# Supplementary material for: A novel gene signature for prognosis prediction and chemotherapy response in patients with pancreatic cancer
Source: Aging (Albany NY). 2021 Apr 26;13(9):12493–513. doi: 10.18632/aging.202922 (PMC8148498; doi:10.18632/aging.202922)
Supplement: Supplementary Table 2 [file aging-13-202922-s003.xls]

## Sheet: Sheet1
Supplementary Table 2. Identification of the RRDEGs in pancreatic cancer.
Genes	pvalue	Regulated in tumor vs normal
CD5L	0.0405365	Down
FXYD3	0.0361882	Up
TSPAN1	0.0368285	Up
STAB2	0.0286821	Down
PERP	0.00261725	Up
S100P	0.00880648	Up
LPXN	0.0113166	Down
GAB3	0.0256854	Down
PKP3	0.014866	Up
MYH14	0.0244738	Up
P2RY13	0.00381785	Down
TFEC	0.0449627	Down
TNS4	0.0060428	Up
PLEK	0.0412741	Down
TNFAIP8L2	0.039476	Down
MARCH1	0.0288293	Down
GPR65	0.0374128	Down
C19orf33	0.0294468	Up
KLK10	0.0116206	Up
TRIM29	0.0096796	Up
PYGB	0.00822611	Up
BAIAP2	0.0101546	Up
KRT19	0.0279885	Up
SPINT2	0.0292308	Up
CD226	0.0348078	Down
NMU	0.0149935	Up
PSCA	0.0134682	Up
FLI1	0.0255027	Down
FAM83A	0.0221266	Up
PCDH1	0.00415187	Up
CD36	0.020384	Down
IGSF6	0.0471281	Down
ARHGAP9	0.0385466	Down
NCF4	0.02883	Down
SPN	0.0306161	Down
SCML4	0.025123	Down
RIPK4	0.0021412	Up
GIMAP8	0.035306	Down
GIMAP1	0.0394504	Down
BIN2	0.0365972	Down
EMP2	0.0188878	Up
CD84	0.0199175	Down
SDC1	0.00172027	Up
TMEM273	0.0260183	Down
BAIAP2L1	0.03509	Up
KRT8	0.0385537	Up
CELF2	0.0428269	Down
CYBB	0.0441178	Down
LCP1	0.00755698	Down
ZNF488	0.0170143	Up
ARHGEF6	0.035214	Down
MBOAT2	0.00408334	Up
MUC5AC	0.00576295	Up
CFP	0.0140861	Down
MCOLN2	0.0190439	Down
C6orf132	0.049191	Up
EPS8L2	0.0488916	Up
CXCR6	0.025399	Down
POU2F2	0.0470437	Down
S100A6	0.0259495	Up
KCNAB2	0.0206172	Down
CD1D	0.0172296	Down
KLK7	0.00289462	Up
CLDN4	0.00659816	Up
LILRB5	0.0128921	Down
GLIPR1	0.0108792	Down
TMEM54	0.0221151	Up
GALNT12	0.0376597	Up
PADI1	0.0347656	Up
FGFBP1	0.0305675	Up
SLAMF8	0.0202676	Down
AMN	0.0419539	Up
KRT15	0.0423262	Up
CAMSAP3	0.0307119	Up
PHLDA2	0.00849334	Up
S100A14	0.0453116	Up
SEMA3D	0.0389518	Down
CAPN9	0.010951	Up
MPEG1	0.0462695	Down
ADA2	0.0134153	Down
CLTB	0.0308039	Up
TRPV2	0.0403463	Down
CLDN7	0.0334362	Up
SLC2A1	0.0162125	Up
ART4	0.00963646	Down
S100A16	0.0120885	Up
CD2	0.0472442	Down
GIMAP7	0.033247	Down
DOCK11	0.0462214	Down
GPSM3	0.0151132	Down
GIMAP6	0.0263626	Down
GJB4	0.0385537	Up
JAML	0.0140846	Down
KLK11	0.0228156	Up
KRT16	0.00730083	Up
CD3D	0.0421484	Down
BCL2A1	0.0366905	Down
IL17RE	0.0291164	Up
ZEB2	0.0287152	Down
FCGR3B	0.0279728	Down
ANO1	0.0185712	Up
ALKAL2	0.044463	Down
GBP5	0.0361882	Down
CPA3	0.0440362	Up
SPIB	0.0241413	Down
CCDC69	0.0313602	Down
CSF2RB	0.0102635	Down
ITGB4	0.029579	Up
NEURL3	0.0172698	Down
MAFF	0.0256481	Up
CLIC3	0.00132289	Up
CAVIN2	0.0435673	Down
DSG3	0.0010956	Up
NECTIN4	0.0454876	Up
PLPP2	0.0439937	Up
DUSP4	0.0230681	Up
FCN1	0.0380717	Down
PTGES	0.0150839	Up
KCNJ16	0.0242719	Down
MELTF	0.024038	Up
KRT7	0.0409527	Up
CHGB	0.0164394	Up
SPINK1	0.0371018	Up
F3	0.0413567	Up
CHGA	0.0443951	Up
ABCC8	0.0225325	Up
SCGN	0.0496091	Up
CTRC	0.0484559	Down
