# Supplementary material for: A novel gene signature for prognosis prediction and chemotherapy response in patients with pancreatic cancer
Source: Aging (Albany NY). 2021 Apr 26;13(9):12493–513. doi: 10.18632/aging.202922 (PMC8148498; doi:10.18632/aging.202922)
Supplement: Supplementary Table 3 [file aging-13-202922-s004.xls]

## Sheet: GO_BP
Supplementary Table 3. Functional enrichment analysis of RRDEGs.
ONTOLOGY	Term	Description	GeneRatio	BgRatio	pvalue	p.adjust	qvalue	geneID	Count
BP	GO:0070268	cornification	8/122	112/18670	7.11383e-07	0.00121646	0.00115469	KRT8/KRT19/KRT7/PERP/PKP3/KRT16/KRT15/DSG3	8
BP	GO:0043312	neutrophil degranulation	12/122	485/18670	8.05633e-05	0.0321848	0.0305503	PYGB/S100P/ADA2/CYBB/CD36/KCNAB2/GLIPR1/ARHGAP9/FCN1/BIN2/CFP/FCGR3B	12
BP	GO:0002283	neutrophil activation involved in immune response	12/122	488/18670	8.54084e-05	0.0321848	0.0305503	PYGB/S100P/ADA2/CYBB/CD36/KCNAB2/GLIPR1/ARHGAP9/FCN1/BIN2/CFP/FCGR3B	12
BP	GO:0042119	neutrophil activation	12/122	498/18670	0.00010342	0.0321848	0.0305503	PYGB/S100P/ADA2/CYBB/CD36/KCNAB2/GLIPR1/ARHGAP9/FCN1/BIN2/CFP/FCGR3B	12
BP	GO:0002446	neutrophil mediated immunity	12/122	499/18670	0.000105389	0.0321848	0.0305503	PYGB/S100P/ADA2/CYBB/CD36/KCNAB2/GLIPR1/ARHGAP9/FCN1/BIN2/CFP/FCGR3B	12
BP	GO:0031424	keratinization	8/122	224/18670	0.000112929	0.0321848	0.0305503	KRT8/KRT19/KRT7/PERP/PKP3/KRT16/KRT15/DSG3	8

## Sheet: GO_CC
Supplementary Table3. Functional enrichment analysis of RRDEGs.
ONTOLOGY	ID	Description	GeneRatio	BgRatio	pvalue	p.adjust	qvalue	geneID	Count
CC	GO:0005911	cell-cell junction	16/124	459/19717	3.11201e-08	6.72195e-06	5.60162e-06	KRT8/CLDN4/PERP/SLC2A1/TRIM29/PCDH1/CLDN7/PKP3/BAIAP2L1/NECTIN4/BAIAP2/CAMSAP3/JAML/DSG3/CD2/GJB4	16
CC	GO:0005913	cell-cell adherens junction	6/124	117/19717	9.69668e-05	0.0103495	0.00862458	TRIM29/PKP3/BAIAP2L1/NECTIN4/BAIAP2/CAMSAP3	6
CC	GO:0016327	apicolateral plasma membrane	3/124	18/19717	0.000184893	0.0103495	0.00862458	KRT8/KRT19/CLDN4	3
CC	GO:0009897	external side of plasma membrane	10/124	393/19717	0.000191657	0.0103495	0.00862458	SDC1/F3/CD36/CD2/FCN1/CD3D/CD1D/CXCR6/CD226/STAB2	10
CC	GO:0030057	desmosome	3/124	25/19717	0.000504661	0.0218013	0.0181678	PERP/PKP3/DSG3	3
CC	GO:0002102	podosome	3/124	30/19717	0.000870651	0.0313434	0.0261195	LCP1/LPXN/BIN2	3

## Sheet: GO_MF
Supplementary Table3. Functional enrichment analysis of RRDEGs.
ONTOLOGY	ID	Description	GeneRatio	BgRatio	pvalue	p.adjust	qvalue	geneID	Count
MF	GO:0098641	cadherin binding involved in cell-cell adhesion	4/117	19/17697	6.51401e-06	0.00184347	0.00167307	TRIM29/PKP3/BAIAP2L1/BAIAP2	4
MF	GO:0050839	cell adhesion molecule binding	13/117	499/17697	2.60717e-05	0.00368915	0.00334816	ITGB4/S100P/TRIM29/LCP1/EPS8L2/PKP3/BAIAP2L1/EMP2/NECTIN4/BAIAP2/JAML/CD1D/CD226	13
MF	GO:0015267	channel activity	11/117	456/17697	0.000219815	0.0158478	0.014383	CLDN4/FXYD3/ANO1/ABCC8/CYBB/KCNAB2/CLIC3/TRPV2/KCNJ16/GJB4/MCOLN2	11
MF	GO:0022803	passive transmembrane transporter activity	11/117	457/17697	0.000223997	0.0158478	0.014383	CLDN4/FXYD3/ANO1/ABCC8/CYBB/KCNAB2/CLIC3/TRPV2/KCNJ16/GJB4/MCOLN2	11
MF	GO:0098632	cell-cell adhesion mediator activity	4/117	50/17697	0.000330484	0.0187054	0.0169764	TRIM29/PKP3/BAIAP2L1/BAIAP2	4
MF	GO:0098631	cell adhesion mediator activity	4/117	59/17697	0.000623936	0.029429	0.0267089	TRIM29/PKP3/BAIAP2L1/BAIAP2	4

## Sheet: KEGG
Supplementary Table3. Functional enrichment analysis of RRDEGs.
ID	Description	GeneRatio	BgRatio	pvalue	p.adjust	qvalue	geneID	Count
hsa04514	Cell adhesion molecules (CAMs)	6/50	147/8016	0.000281	0.0277825	0.0251091	CLDN4/SDC1/CLDN7/SPN/CD2/CD226	6
