# Supplementary material for: A novel gene signature for prognosis prediction and chemotherapy response in patients with pancreatic cancer
Source: Aging (Albany NY). 2021 Apr 26;13(9):12493–513. doi: 10.18632/aging.202922 (PMC8148498; doi:10.18632/aging.202922)
Supplement: Supplementary Table 4 [file aging-13-202922-s005.xls]

## Sheet: univariate cox analysis
Supplementary Table 4. Univariate Cox regression analysis of RRDEGs in training group.
Gene	Coefficient	Standard error	z	HR	1/HR	P value	95% CI(Lower)	95% CI(Upper)	Regulated
S100A6	0.264607	0.105876	2.4992	1.30292	0.767508	0.0124472	1.05875	1.60339	Up
KRT8	0.494675	0.158074	3.12938	1.63997	0.609769	0.00175175	1.20304	2.23557	Up
KRT19	0.383231	0.116649	3.28533	1.46702	0.681656	0.00101864	1.16719	1.84386	Up
KRT7	0.351636	0.109629	3.20752	1.42139	0.703536	0.00133886	1.14656	1.7621	Up
SPINK1	0.109405	0.054939	1.99138	1.11561	0.896368	0.046439	1.00173	1.24245	Up
CHGB	-0.104339	0.0484285	-2.15449	0.90092	1.10998	0.031202	0.81934	0.990624	Up
ITGB4	0.277194	0.104574	2.6507	1.31942	0.757908	0.0080325	1.07491	1.61956	Up
CLDN4	0.26317	0.111086	2.36907	1.30105	0.768612	0.0178328	1.04649	1.61752	Up
SDC1	0.252588	0.109671	2.30315	1.28735	0.776788	0.0212703	1.03835	1.59606	Up
MUC5AC	0.147274	0.0482795	3.05044	1.15867	0.863058	0.00228503	1.05406	1.27367	Up
MYH14	0.331514	0.142662	2.32377	1.39308	0.717836	0.0201378	1.05327	1.84251	Up
CHGA	-0.137784	0.0523766	-2.63064	0.871287	1.14773	0.00852243	0.786281	0.965482	Up
PERP	0.493939	0.149994	3.29307	1.63876	0.610218	0.000991005	1.22135	2.19882	Up
S100A16	0.379472	0.1333	2.84674	1.46151	0.684222	0.0044169	1.12548	1.89788	Up
SLC2A1	0.192016	0.087515	2.19409	1.21169	0.825294	0.0282289	1.0207	1.43842	Up
TSPAN1	0.309539	0.116894	2.64802	1.3628	0.733785	0.00809637	1.08375	1.71369	Up
S100P	0.178652	0.0664414	2.68886	1.1956	0.836397	0.00716965	1.04962	1.36189	Up
PSCA	0.16986	0.0530825	3.19992	1.18514	0.843783	0.00137467	1.06803	1.31508	Up
TRIM29	0.180711	0.0728283	2.48133	1.19807	0.834677	0.0130895	1.0387	1.38189	Up
S100A14	0.169735	0.0709061	2.39379	1.18499	0.843889	0.0166751	1.03124	1.36166	Up
F3	0.266114	0.105187	2.52992	1.30488	0.766352	0.0114088	1.06179	1.60364	Up
PCDH1	0.609745	0.18604	3.2775	1.83996	0.543489	0.00104729	1.27777	2.64951	Up
ANO1	0.5105	0.149614	3.41211	1.66612	0.600195	0.000644614	1.24267	2.23388	Up
PKP3	0.308	0.128378	2.39916	1.3607	0.734915	0.0164327	1.058	1.75	Up
BAIAP2L1	0.303937	0.138081	2.20115	1.35518	0.737907	0.0277254	1.03386	1.77637	Up
ABCC8	-0.113803	0.057306	-1.98588	0.892434	1.12053	0.0470463	0.797622	0.998516	Up
KLK10	0.265506	0.08246	3.21982	1.30409	0.766818	0.00128273	1.10948	1.53284	Up
C19orf33	0.256961	0.0868476	2.95875	1.29299	0.773399	0.00308889	1.09062	1.53293	Up
TNS4	0.153369	0.0686875	2.23286	1.16576	0.857813	0.0255583	1.01892	1.33375	Up
PLPP2	0.391081	0.129057	3.03029	1.47858	0.676326	0.0024432	1.14813	1.90414	Up
KRT16	0.220538	0.0634565	3.47542	1.24675	0.802087	0.000510062	1.10094	1.41186	Up
MELTF	0.219656	0.096737	2.27066	1.24565	0.802795	0.0231678	1.03051	1.5057	Up
KLK7	0.125462	0.0616157	2.0362	1.13367	0.882089	0.0417303	1.00471	1.27919	Up
NECTIN4	0.256887	0.0983242	2.61266	1.2929	0.773455	0.00898414	1.06628	1.56768	Up
MAFF	0.337824	0.164259	2.05665	1.40189	0.713321	0.0397197	1.01601	1.93434	Up
PADI1	0.174288	0.0587314	2.96754	1.1904	0.840055	0.00300188	1.06096	1.33562	Up
KLK11	0.20356	0.0759307	2.68086	1.22576	0.815821	0.00734325	1.05626	1.42245	Up
FAM83A	0.250931	0.063944	3.92423	1.28522	0.778076	8.70086e-05	1.13383	1.45682	Up
C6orf132	0.492488	0.155327	3.17065	1.63638	0.611104	0.00152098	1.2069	2.21871	Up
PTGES	0.282444	0.0974433	2.89855	1.32637	0.753939	0.00374895	1.09577	1.60549	Up
PHLDA2	0.196961	0.0985265	1.99906	1.2177	0.821223	0.0456015	1.00386	1.47708	Up
RIPK4	0.374405	0.169917	2.20346	1.45413	0.687698	0.0275625	1.04224	2.02878	Up
CELF2	-0.352584	0.144453	-2.44082	0.702869	1.42274	0.0146541	0.529561	0.932897	Down
IL17RE	0.435242	0.16171	2.69149	1.54534	0.647108	0.00711333	1.12558	2.12164	Up
KRT15	0.250359	0.0960946	2.60534	1.28449	0.778521	0.00917831	1.06398	1.55069	Up
DSG3	0.257826	0.0773919	3.33144	1.29411	0.77273	0.000863991	1.11198	1.50608	Up
FGFBP1	0.190037	0.0888664	2.13846	1.20929	0.826929	0.0324798	1.01599	1.43938	Up
GJB4	0.395771	0.121055	3.26935	1.48553	0.673161	0.00107793	1.17176	1.88331	Up
GIMAP1	-0.440697	0.212254	-2.07627	0.643587	1.55379	0.0378688	0.424557	0.975615	Down
ZNF488	0.473587	0.148166	3.19632	1.60574	0.622764	0.00139194	1.20104	2.14682	Up
SCML4	-0.525322	0.243	-2.16182	0.591365	1.691	0.0306322	0.367294	0.952133	Down
