# Supplementary material for: A novel gene signature for prognosis prediction and chemotherapy response in patients with pancreatic cancer
Source: Aging (Albany NY). 2021 Apr 26;13(9):12493–513. doi: 10.18632/aging.202922 (PMC8148498; doi:10.18632/aging.202922)
Supplement: Supplementary Table 5 [file aging-13-202922-s006.xls]

## Sheet: Sheet1
Supplementary Table 5. Mean cross-validation error(CVM)and Standard deviation of CVM (CVSD) for each lambda in the LASSO regression.
Lambda	ln(Lambda)	Mean cross-validation error(CVM)	Standard deviation of CVM (CVSD)	CVM + CVSD	CVM - CVSD
0.271107	-1.30524	9.88723	0.282662	10.113	9.61933
0.247022	-1.39828	9.8763	0.283285	10.1008	9.61032
0.225078	-1.49131	9.85247	0.284549	10.0797	9.59668
0.205082	-1.58434	9.82762	0.287324	10.0586	9.58305
0.186863	-1.67738	9.81048	0.291088	10.0411	9.57362
0.170263	-1.77041	9.80004	0.295198	10.0298	9.57003
0.155137	-1.86345	9.79873	0.301651	10.0252	9.57073
0.141355	-1.95648	9.80103	0.308557	10.0257	9.57423
0.128798	-2.04951	9.80249	0.316579	10.0259	9.57683
0.117356	-2.14255	9.80488	0.32798	10.0197	9.57401
0.10693	-2.23558	9.80219	0.340263	10.0062	9.56408
0.0974307	-2.32861	9.79359	0.347885	9.98081	9.54386
0.0887752	-2.42165	9.77883	0.354794	9.95186	9.51928
0.0808887	-2.51468	9.76545	0.362203	9.92752	9.49794
0.0737028	-2.60772	9.75558	0.369727	9.90872	9.47973
0.0671552	-2.70075	9.74897	0.377366	9.89568	9.46532
0.0611893	-2.79378	9.74539	0.385052	9.88721	9.45439
0.0557534	-2.88682	9.75339	0.399912	9.88401	9.44874
0.0508005	-2.97985	9.77697	0.41853	9.8905	9.45144
0.0462875	-3.07288	9.82752	0.451785	9.91722	9.46747
0.0421754	-3.16592	9.92606	0.523194	9.97433	9.50388
0.0384287	-3.25895	10.0465	0.611996	10.0782	9.56334
0.0350148	-3.35199	10.1796	0.710852	10.2174	9.6333
0.0319042	-3.44502	10.3379	0.816495	10.386	9.71269
0.0290699	-3.53805	10.5234	0.931682	10.5858	9.80271
0.0264874	-3.63109	10.7452	1.06558	10.8508	9.92326
0.0241343	-3.72412	10.9921	1.20604	11.2076	10.0858
0.0219903	-3.81715	11.2444	1.34061	11.6521	10.2707
0.0200367	-3.91019	11.5344	1.49129	12.1725	10.4722
0.0182567	-4.00322	11.8879	1.65734	12.7752	10.6871
0.0166349	-4.09625	12.2999	1.82483	13.4507	10.9051
0.0151571	-4.18929	12.7936	2.00179	14.1967	11.1178
0.0138106	-4.28232	13.3477	2.18769	15.0474	11.3356
0.0125837	-4.37536	14.0149	2.39309	15.9601	11.5874
0.0114658	-4.46839	14.8172	2.62216	16.9189	11.9063
0.0104472	-4.56142	15.77	2.87404	17.9854	12.3097
0.00951908	-4.65446	16.8394	3.16673	19.0986	12.7673
0.00867343	-4.74749	18.0411	3.51101	20.2686	13.2867
0.0079029	-4.84052	19.4005	3.90091	21.5707	13.9154
0.00720083	-4.93356	20.9021	4.36233	22.8176	14.62
0.00656113	-5.02659	22.3522	4.81596	24.0296	15.4087
0.00597826	-5.11963	23.9238	5.32731	25.3557	16.3127
0.00544717	-5.21266	25.6836	5.90625	26.7544	17.3058
0.00496325	-5.30569	27.6243	6.51115	28.2497	18.4022
0.00452233	-5.39873	29.8256	7.13711	29.8229	19.5767
0.00412058	-5.49176	32.4909	7.97438	31.43	20.7727
0.00375452	-5.58479	35.325	8.9246	33.1519	22.0263
0.00342098	-5.67783	38.013	9.77755	35.0148	23.3933
0.00311707	-5.77086	40.588	10.5927	36.9423	24.8263
0.00284016	-5.8639	43.089	11.3963	38.9448	26.2784
0.00258785	-5.95693	45.5791	12.1947	41.0455	27.7541
0.00235795	-6.04996	48.1431	13.0717	43.2199	29.2781
0.00214847	-6.143	50.5658	13.8576	45.4779	30.8699
0.00195761	-6.23603	52.9732	14.6311	47.9585	32.6077
0.0017837	-6.32906	55.2867	15.3657	50.4792	34.327
0.00162524	-6.4221	57.5787	16.1063	52.9009	35.9441
0.00148086	-6.51513	59.8452	16.8601	55.2776	37.5052
0.0013493	-6.60817	61.992	17.5725	57.5604	38.9848
0.00122944	-6.7012	64.0395	18.2598	59.7768	40.417
0.00112022	-6.79423	66.0914	18.9891	61.9425	41.8134
0.0010207	-6.88727	68.0911	19.7034	64.1201	43.1937
0.000930023	-6.9803	70.0136	20.3841	66.2715	44.5387
0.000847403	-7.07333	71.819	21.028	68.3636	45.8402
0.000772122	-7.16637	73.5957	21.6715	70.3272	47.0592
0.000703529	-7.2594	75.3544	22.3162	72.179	48.2009
0.000641029	-7.35244	77.0162	22.9279	73.9663	49.3033
0.000584082	-7.44547	78.5525	23.4754	75.6535	50.3436
0.000532194	-7.5385	80.1288	24.0727	77.233	51.3221
0.000484915	-7.63154	81.5738	24.6141	78.6905	52.2168
0.000441836	-7.72457	82.8811	25.1055	80.0571	53.0579
0.000402585	-7.8176	84.0885	25.5626	81.3528	53.8376
0.00036682	-7.91064	85.2258	25.9894	82.5608	54.5708
0.000334233	-8.00367	86.2256	26.3677	83.5765	55.1938
0.000304541	-8.09671	87.1261	26.6984	84.536	55.7792
0.000277486	-8.18974	87.9289	27.0013	85.5396	56.416
