# Supplementary material for: A novel gene signature for prognosis prediction and chemotherapy response in patients with pancreatic cancer
Source: Aging (Albany NY). 2021 Apr 26;13(9):12493–513. doi: 10.18632/aging.202922 (PMC8148498; doi:10.18632/aging.202922)
Supplement: Supplementary Table 6 [file aging-13-202922-s007.xls]

## Sheet: HALLMARK
Supplementary Table 6. Gene set enrichment analysis between high and low risk groups in 165 samples from TCGA PAAD.
Description	setSize	enrichmentScore	NES	pvalue	p.adjust	qvalues	rank	leading_edge	core_enrichment
HALLMARK_PANCREAS_BETA_CELLS	40	-0.814905	-2.47538	0.00182815	0.00573723	0.00181176	1659	tags=60%, list=9%, signal=55%	2308/6812/6514/4825/10000/2641/1641/4005/3375/3670/2645/9935/57818/6750/4821/5080/3642/4760/5063/5122/10590/6833/5126/1113
HALLMARK_ALLOGRAFT_REJECTION	196	-0.534821	-2.0629	0.00171527	0.00573723	0.00181176	2201	tags=36%, list=12%, signal=32%	3824/3689/8807/3394/3559/9466/2113/1435/942/3112/9607/10261/3001/3109/4689/8477/5551/1230/959/3122/6688/50852/926/114548/9450/924/3569/4050/3111/3117/3560/2533/2268/915/6351/6352/917/3937/27240/894/10225/920/912/729230/7903/919/6347/1234/6367/23166/7454/940/3662/5552/914/6775/5199/925/11184/7535/3683/322/916/3059/3603/3702/10563/5788/973/5579/6363
HALLMARK_IL6_JAK_STAT3_SIGNALING	86	-0.432984	-1.48793	0.00894454	0.017201	0.00543191	1948	tags=29%, list=10%, signal=26%	3559/7133/1435/3554/1438/94/9021/1230/1441/929/3572/3563/10148/3569/4050/2/1271/952/3953/23533/3676/1439/10563/948/5320
HALLMARK_INFLAMMATORY_RESPONSE	199	-0.379466	-1.46833	0.00171527	0.00573723	0.00181176	2362	tags=31%, list=13%, signal=28%	8809/4049/2867/4481/1440/2550/5996/10507/8807/3759/5027/7133/490/1435/728/7439/3554/6506/7432/7832/8578/19/1441/6324/719/114548/929/9435/2357/3738/2811/10148/3569/6361/2643/6401/3560/1880/6352/3937/1536/10663/6504/6347/6367/1902/23166/2719/23533/6869/1240/5142/969/10203/187/10242/3587/6402/962/6542/3575/1236
HALLMARK_KRAS_SIGNALING_UP	199	-0.379203	-1.46731	0.00171527	0.00573723	0.00181176	2006	tags=32%, list=11%, signal=29%	3394/7128/7133/2113/6480/51311/50856/10457/2254/51199/1438/3075/347/3290/56172/9590/2022/10418/6324/719/9945/2995/7805/7185/6304/2162/83483/2791/7462/2324/55273/64123/894/2982/25960/1149/5175/7852/5121/1240/1794/11184/4674/8404/3587/5178/9935/951/3936/23136/90865/9892/10320/5243/3575/3800/27344/6616/5649/1363/6447/7102/29106
HALLMARK_HEDGEHOG_SIGNALING	36	-0.494612	-1.45684	0.0315985	0.049682	0.0156891	3150	tags=50%, list=17%, signal=42%	8861/1808/8829/23462/2735/7070/8633/5727/3897/8851/7436/4825/1271/6585/1400/4897/6252/7857
HALLMARK_MYOGENESIS	198	-0.363147	-1.40299	0.00343053	0.00779666	0.0024621	4461	tags=39%, list=24%, signal=30%	3756/6876/624/9172/6450/6678/65055/9659/6442/1134/6261/4842/7433/4616/58529/58498/29970/3270/4851/844/10278/10468/8038/1292/1346/140465/8557/6649/5569/5740/10014/5621/4621/4638/1266/3490/5348/22924/2548/845/2180/11155/5837/70/4629/8614/347/22808/6444/7140/11156/4046/1410/3908/6300/1306/2702/1756/26353/10580/10290/8912/4208/1674/1675/1837/3757/3679/187/3479/816/1191/2273/4684/2775/948/2878
HALLMARK_IL2_STAT5_SIGNALING	199	-0.341671	-1.32209	0.0205832	0.0354883	0.0112068	2598	tags=31%, list=14%, signal=27%	5621/3682/9173/55509/5727/57157/8809/123/11230/1154/92749/943/6335/3394/3559/7133/1435/942/23413/23258/975/29851/28996/58528/51284/152007/80760/1493/64375/5583/84230/6095/8477/2983/8320/3563/5179/7185/8611/4050/9308/8530/3560/894/5325/126669/399/10875/3662/8835/7074/1233/23208/3587/596/4135/6402/962/5243/974/6403/333
HALLMARK_XENOBIOTIC_METABOLISM	197	0.322547	1.27781	0.0334129	0.049682	0.0156891	2699	tags=28%, list=14%, signal=24%	1969/29785/978/1728/9536/8714/7498/218/3294/3728/1401/5967/1562/27346/54498/645/6510/10653/435/8876/5831/8644/2168/1573/54884/8942/2646/957/3417/55502/629/2203/3172/115817/839/760/4522/9564/23564/5699/51635/191/5447/1312/873/2937/3484/7009/1592/7378/211/29950/2618/9446/3251
HALLMARK_COAGULATION	138	0.349224	1.30938	0.0311111	0.049682	0.0156891	1567	tags=20%, list=8%, signal=19%	1510/4316/726/4320/3673/11202/2152/8754/2266/5328/928/1515/3158/4323/5327/4312/23764/2161/824/5879/301/283/6284/629/3172/1848/4324/1311
HALLMARK_PEROXISOME	104	0.365855	1.33054	0.0333333	0.049682	0.0156891	4189	tags=48%, list=22%, signal=38%	1382/51703/8856/706/7153/3291/6820/1718/9961/9249/8915/54884/26986/3417/373156/2172/213/51170/5194/25824/412/1022/2224/80270/1056/10512/11001/5052/347734/3418/54982/1962/8799/4436/6599/30/6342/8443/23457/1891/3155/7555/390916/9525/83752/5828/3416/10005/3265/1503
HALLMARK_PROTEIN_SECRETION	96	0.373856	1.34693	0.0337838	0.049682	0.0156891	4294	tags=40%, list=23%, signal=31%	7103/3875/858/1956/3382/102/525/476/11079/7251/57403/8773/375/10040/10959/8774/51614/10565/1176/7163/27236/1175/9183/5868/10972/9367/1315/10067/163/26286/10652/5862/9525/372/1211/2803/9341/9276
HALLMARK_TNFA_SIGNALING_VIA_NFKB	199	0.351511	1.39291	0.00477327	0.0103767	0.00327684	3092	tags=36%, list=16%, signal=30%	3914/7262/6385/3949/9322/5329/2152/1942/8870/2150/5328/56937/8061/5743/595/7050/374/8553/8744/4084/4088/1846/3280/3606/23764/9314/23529/22822/7127/8942/51278/23645/6890/8767/6364/650/1051/9334/2526/80149/7422/3601/6303/10938/5970/182/602/330/2683/3976/64135/50486/10221/4791/5971/5606/79155/960/4794/1316/6372/9592/3460/3624/10318/6373/8878/5055/3659/3552/9034
HALLMARK_APOPTOSIS	159	0.369673	1.42832	0.00671141	0.0134228	0.00423878	2387	tags=29%, list=13%, signal=25%	3958/3875/706/2065/7153/638/51330/2064/2769/8870/2069/595/10682/598/3315/5327/5058/3606/6574/8915/301/54884/5366/6890/650/837/5663/4000/839/840/7417/841/6303/5970/330/10410/3669/1017/8743/3148/3489/10134/994/4255/1649/960
HALLMARK_APICAL_JUNCTION	199	0.369131	1.46273	0.00238663	0.00573723	0.00181176	1923	tags=24%, list=10%, signal=21%	1308/51208/3914/3918/3691/1001/81607/3909/1364/3675/3728/5097/3673/2886/347902/10205/1366/8754/7408/6237/794/7045/999/6624/6714/81/103910/54509/92359/4192/1500/8751/1495/4597/79849/1265/1956/5819/60/10487/51474/7414/5291/7791/1825/2683/5818
HALLMARK_FATTY_ACID_METABOLISM	155	0.39425	1.50873	0.00227273	0.00573723	0.00181176	4134	tags=41%, list=22%, signal=32%	51703/6281/218/11343/3939/1718/92840/226/3158/3248/3157/8876/2168/54884/3417/5720/79602/2820/51170/760/8801/4282/6611/1056/3320/131076/1632/4913/50814/10808/26275/50486/23173/5092/873/1429/6296/9246/4191/1892/35/1743/1371/728294/387893/1962/3956/9588/30/39/6391/328/6389/1891/6392/2169/3155/3052/58505/51478/2271/10005/4128
HALLMARK_TGF_BETA_SIGNALING	54	0.467124	1.51567	0.0183066	0.0326904	0.0103233	3402	tags=35%, list=18%, signal=29%	3397/56937/999/7050/4088/8412/4091/6574/57154/23645/5499/650/3065/7082/9241/3460/6711/6498/387
HALLMARK_UNFOLDED_PROTEIN_RESPONSE	109	0.421058	1.54172	0.00656455	0.0134228	0.00423878	5916	tags=59%, list=31%, signal=41%	30001/1163/54541/7534/1978/11015/55466/25804/1051/7422/9136/9531/56915/79094/8815/3484/1981/27230/1965/811/10797/1054/10130/10897/4869/29968/51013/5832/8140/1662/28972/5073/4800/6464/54512/3309/27257/9221/55651/1736/3434/57472/10605/468/3799/23478/8602/7466/8570/2521/60559/7184/10954/1974/58477/9775/3313/55738/11260/5394/10775/55272/10525/6208
HALLMARK_NOTCH_SIGNALING	32	0.534947	1.58572	0.013245	0.0245278	0.00774563	3316	tags=41%, list=18%, signal=34%	3955/6934/595/7855/3280/113878/23220/51107/182/7474/55851/5467/7472
HALLMARK_DNA_REPAIR	149	0.433175	1.64653	0.00223214	0.00573723	0.00181176	5058	tags=48%, list=27%, signal=35%	978/57804/11130/23204/79720/4860/5888/5898/2987/353/5437/10309/5423/7298/5111/1603/4350/30833/7251/124583/5984/6809/10134/51251/6881/11047/4830/2237/1716/3704/10959/29901/3251/6749/129607/6119/30834/3615/56655/51160/10063/51082/7936/5424/51292/5982/5439/2959/7084/10714/5440/29927/11051/25920/8721/5985/4832/2073/23649/100/286075/3978/6829/7372/6880/2967/22916/6883/8480/2958/9978
HALLMARK_HYPOXIA	199	0.423457	1.67801	0.00238663	0.00573723	0.00181176	2412	tags=33%, list=13%, signal=29%	6513/771/3099/6275/9957/6385/302/51316/30001/133/1944/6820/3939/5329/2152/1942/8870/205/7045/5214/5317/226/54541/8553/3219/2597/5033/3486/23764/1356/4493/136/5230/51129/11015/2023/26136/7167/23645/2203/1956/112464/3098/839/7162/4282/26355/7422/7052/25824/230/1907/2239/3669/7511/901/8991/2817/3069/55818/5236/1289/1649/3484/23327/1316
HALLMARK_P53_PATHWAY	196	0.466486	1.84622	0.00238663	0.00573723	0.00181176	3838	tags=43%, list=20%, signal=35%	5268/2810/3691/3872/1969/6275/6281/6382/4071/6768/23657/7039/11202/64065/64787/8870/55240/2877/54541/8744/4084/8673/10140/578/9618/9314/23303/54884/3732/51278/23645/6890/650/677/26355/7135/6303/23612/1606/2872/63874/3654/57761/6667/9538/3976/5111/7421/79651/5912/29946/10904/23654/29948/57799/51065/1649/7378/8626/30851/11059/6236/51768/5883/26471/55270/10628/1029/6141/3552/25873/5154/1509/5784/786…
HALLMARK_OXIDATIVE_PHOSPHORYLATION	200	0.471363	1.86518	0.00240964	0.00573723	0.00181176	6120	tags=65%, list=32%, signal=44%	3939/10312/7416/481/54884/3417/840/7417/4709/9377/29088/10651/4697/509/1537/1632/1329/1340/9551/1337/1345/5447/6183/4259/518/2108/7388/54205/4710/65003/10440/521/3418/54704/211/7384/4191/1892/27089/2746/1349/1743/527/2821/10939/10063/514/4706/7385/292/4729/30/56945/80273/10128/4728/4720/89941/26521/1327/4704/2109/6391/6389/51382/1891/6392/3052/2230/64960/56993/581/513/517/56898/4717/26520/1351/22…
HALLMARK_CHOLESTEROL_HOMEOSTASIS	73	0.544204	1.87733	0.00221239	0.00573723	0.00181176	3692	tags=56%, list=20%, signal=45%	3958/6282/5468/114569/3949/7869/51330/5329/6713/23474/27346/928/10682/2222/1717/118429/3157/4597/312/6319/55902/182/230/5833/57761/2224/50814/5359/1595/54206/71/7108/10654/308/58191/3156/4598/1119/39/1891/6309
HALLMARK_ESTROGEN_RESPONSE_EARLY	200	0.476419	1.88518	0.00240964	0.00573723	0.00181176	1278	tags=27%, list=7%, signal=25%	7031/3880/5655/2810/4582/6337/6513/9022/3898/771/27134/7033/51195/9536/79083/3875/2317/3856/29984/3860/221/1999/7739/7869/80004/26509/6820/1366/5029/8645/64699/3866/11145/2274/794/9620/595/374/8553/645/91683/6566/2222/10140/1717/3280/9249/2288/58495/9314/23541/11057/25987/5366
HALLMARK_MITOTIC_SPINDLE	197	0.492909	1.95272	0.00238663	0.00573723	0.00181176	2844	tags=34%, list=15%, signal=29%	2317/54443/22974/5347/7153/1063/983/1894/4751/10276/9787/201176/9133/7430/55785/332/23607/699/51203/9055/6790/24137/6624/11004/3832/2017/81/54509/29127/1062/7277/7272/11135/4643/9700/10403/4001/56992/23012/55722/382/10435/9585/9266/3619/5829/9564/7414/9735/9181/6780/10928/10051/3835/121512/394/134549/8476/8976/80119/29901/58526/10006/10565/6711/9793
HALLMARK_ESTROGEN_RESPONSE_LATE	200	0.510407	2.01967	0.00240964	0.00573723	0.00181176	1659	tags=33%, list=9%, signal=30%	7031/23650/3880/5655/2810/6337/3918/2707/9022/11187/11012/10551/771/27134/7033/51195/9536/2317/3860/2582/10874/221/6768/51599/991/7153/7869/26509/64065/6820/7264/8645/64699/11145/10112/928/57834/999/595/374/645/3158/990/6566/2222/3613/10140/445/4192/1717/2288/10538/7263/58495/9314/6652/11057/9547/6491/7162/2013/7022/760/10733/51659/55806
HALLMARK_MYC_TARGETS_V2	58	0.641264	2.11643	0.0021978	0.00573723	0.00181176	5014	tags=69%, list=27%, signal=51%	3099/5347/27346/3177/3336/4173/6652/3329/11335/10733/9136/79077/6573/56915/9238/7374/51388/5245/10196/26354/54663/7965/8886/80324/4869/5036/51491/9221/23160/9064/23223/92856/51154/79050/6949/2193/79711/4174/4839/64216
HALLMARK_INTERFERON_ALPHA_RESPONSE	95	0.587019	2.11754	0.00220751	0.00573723	0.00181176	4183	tags=61%, list=22%, signal=48%	8638/3429/4061/54809/9636/55601/116071/64108/684/2634/5721/85441/5696/9111/5698/6890/5720/64761/8767/3665/841/3430/4599/3437/219285/10581/10561/10410/3959/3669/93343/64135/6737/94240/5359/85363/54625/10964/5684/9246/8519/3566/129607/6373/3659/10628/9034/567/3433/3107/87178/3574/83666/11054/10379/9830/4343/961
HALLMARK_MTORC1_SIGNALING	197	0.54363	2.15365	0.00238663	0.00573723	0.00181176	3809	tags=55%, list=20%, signal=44%	6513/3099/3949/30001/112399/23657/5347/6241/3939/1718/6713/27346/699/205/928/10682/226/6790/54541/8553/6510/2597/5033/54843/1717/7277/3336/4173/3157/5230/2023/26136/79071/4860/6652/4171/3329/7167/23645/3417/26227/6319/5464/79602/80777/899/5478/9136/8894/57761/3145/871/5719/2181/27101/6184/5052/10963/5606/10213/7374/4793/5236/1649/1595/10452/10987/5684/3638/27230/8833/3251/81873/993/5706/7037/2647…
HALLMARK_GLYCOLYSIS	196	0.587597	2.32554	0.00238663	0.00573723	0.00181176	2594	tags=43%, list=14%, signal=38%	4233/10331/7033/3099/2582/1999/53836/6382/9123/30001/726/112399/1944/7039/638/983/7264/3939/375790/5834/8870/6662/5768/4907/10112/205/7045/5214/226/6790/54541/79644/7295/3161/1824/5033/3486/6676/2288/5318/55635/1058/136/5230/5315/51129/11015/23443/2023/1468/283/7167/8702/3417/10164/1956/6888/6120/839/7162/5478/10380/4282/26355/7422/2239/2683/4166/3669/10616/5373/5836/50814/2817/3069/2673/1289/960…
HALLMARK_E2F_TARGETS	198	0.627123	2.48513	0.00238663	0.00573723	0.00181176	3675	tags=55%, list=19%, signal=44%	3159/4288/991/5347/7153/7083/51155/983/6241/9787/9133/4605/1164/1163/332/9833/55143/146909/6790/24137/9232/11004/55723/3161/29127/1062/29089/701/4173/81624/147841/55635/9700/10635/9212/9837/2146/10615/4171/1033/4085/23594/83461/4001/9319/11113/27338/79733/79019/1111/6628/10460/10733/79077/83463/898/10535/3070/5111/10051/10606/197335/3835/580/29028/3148/9238/6941/7374/994/4830/7884/4176/5901/993/4…
HALLMARK_G2M_CHECKPOINT	193	0.634249	2.50318	0.00233645	0.00573723	0.00181176	3200	tags=47%, list=17%, signal=39%	3159/11065/22974/4288/991/5347/7153/1063/51155/983/4751/9133/4605/6713/1164/1163/10024/332/699/51203/9055/595/6790/890/24137/9232/11004/990/3832/4088/3161/29127/1062/57082/55872/1869/7272/3226/1058/9700/1946/9212/10403/8318/2146/4171/10721/1033/4085/23594/4001/56992/9156/8438/5371/6491/899/1841/27338/1111/10460/9585/10733/51659/3619/5119/602/10419/10051/3835/580/10036/6558/7150/4331/994/1950/1029…
HALLMARK_MYC_TARGETS_V1	195	0.646965	2.5585	0.00235849	0.00573723	0.00181176	5214	tags=74%, list=28%, signal=54%	991/3939/890/3336/4173/7416/3068/5230/8318/4171/3329/4085/26986/6150/6732/11335/5478/7298/9136/9377/6637/8894/6626/5111/10856/1017/1537/5634/5984/5496/6187/10213/6742/23016/1207/4830/22948/6240/8662/5707/10987/1478/23196/4176/6634/5245/6632/3251/5901/9188/4999/5706/2091/5688/1176/1965/6633/2935/7203/3615/26354/5687/5685/5425/6141/7284/4706/6627/7965/6188/9184/5902/5713/8886/10728/4869/10921/2079/…

## Sheet: C2
Supplementary Table6. Gene set enrichment analysis between high and low risk groups in 165 samples from TCGA PAAD
Description	setSize	enrichmentScore	NES	pvalue	p.adjust	qvalues	rank	leading_edge	core_enrichment
SMID_BREAST_CANCER_NORMAL_LIKE_UP	455	-0.72486	-3.0231	0.0015748	0.0149503	0.00956095	2580	tags=67%, list=14%, signal=60%	4147/1540/80310/5330/11025/4638/6843/7056/6483/2669/1264/8809/608/6614/5348/1803/3119/2687/23547/643/151449/10982/23031/216/259197/715/5368/1112/3394/25780/10734/4629/9466/1215/7133/6480/718/50856/11010/4066/2841/3554/6935/9473/50615/104/2277/3112/653361/79649/10865/1438/4818/3043/716/25802/5295/3075/11178/1908/55790/7456/94/83714/29851/3087/199/3001/4145/80760/51177/4223/4689/1634/135138/9627/86…
VECCHI_GASTRIC_CANCER_EARLY_DN	353	-0.701273	-2.8661	0.00164474	0.0149503	0.00956095	2632	tags=58%, list=14%, signal=50%	79901/956/80310/4653/2852/1600/157869/1073/55022/152573/2908/1264/2104/608/8382/55137/845/55553/8309/137970/644150/11155/284/120103/216/23683/5368/284391/342926/6003/5350/83478/6571/151556/84952/2850/57393/1831/6506/4246/361/3112/222008/5274/79772/387119/3075/11251/23284/79656/256691/154/28999/80760/51309/25924/9863/4118/6638/4916/2619/3908/6514/6095/23111/3945/79746/256714/7436/92737/28513/9936/…
SABATES_COLORECTAL_ADENOMA_DN	278	-0.700885	-2.79389	0.00169779	0.0149503	0.00956095	1786	tags=53%, list=9%, signal=49%	3897/10457/6368/7145/51050/5865/7432/653361/222008/9429/25802/284723/3075/1908/79656/256691/7482/51284/80760/4223/85004/7512/9590/8639/140803/108/219348/28513/5764/5101/255231/6689/2162/55026/26228/5139/590/2042/1511/340533/10082/653/2641/80031/55273/152330/7991/9099/443/154661/220965/4692/23768/23302/9899/6352/5539/81035/1843/114815/145270/27240/10810/2192/23158/120892/29802/114786/54738/2824/22…
WINTER_HYPOXIA_DN	49	-0.833173	-2.60826	0.00184502	0.0149503	0.00956095	1698	tags=80%, list=9%, signal=73%	3112/122773/472/51284/25849/80183/2123/2995/3635/4005/2487/10396/2124/940/9459/65982/55843/8490/91526/1794/170575/171024/10516/2313/3071/596/23345/5168/9750/3603/962/168537/10320/5243/5788/973/9452/10659/6363
SMID_BREAST_CANCER_LUMINAL_A_UP	84	-0.740806	-2.55797	0.00175131	0.0149503	0.00956095	1933	tags=60%, list=10%, signal=54%	4629/7079/1359/8614/3043/25802/80760/7832/3908/5764/7786/2162/3991/10687/5241/1843/2099/4958/8839/5733/2192/10742/3953/79987/7704/26033/4239/1675/3679/6424/477/3131/5168/3952/2819/2674/3479/8483/1805/2354/2273/7373/10351/4969/5346/6252/2167/9370/91851/125
LEE_DIFFERENTIATING_T_LYMPHOCYTE	184	-0.666131	-2.54563	0.00165289	0.0149503	0.00956095	2594	tags=49%, list=14%, signal=43%	397/360/694/6843/25957/23225/7915/9759/3689/7351/84636/10507/9404/137835/10734/25956/11320/246175/23077/29851/53347/199/57118/4118/7832/5583/50852/5588/2123/7805/28984/26034/6304/23048/4050/54900/54518/124460/5294/2533/4068/915/917/10396/9535/2289/10225/197358/23240/2124/81704/117289/919/9938/89857/80709/2260/7852/399/257106/9459/55843/1043/64333/963/914/6503/1794/374403/80342/11184/11151/2313/51…
LINDGREN_BLADDER_CANCER_CLUSTER_2B	380	-0.616842	-2.53744	0.00160772	0.0149503	0.00956095	2516	tags=47%, list=13%, signal=42%	128077/1073/4638/7056/4856/5573/29995/2669/57157/25861/4660/1266/3490/3119/2037/6867/91607/22795/241/715/5368/2040/8460/7128/9466/144165/6480/3371/11010/11259/7145/953/83700/1831/2006/716/54438/54492/10219/3087/10019/199/152007/6567/9021/4921/2199/64092/9590/54345/8639/1842/5583/84230/3122/358/140885/4242/719/9936/864/84668/1306/5156/10763/26002/2702/2123/221395/7805/3491/26508/8786/10148/7185/27…
NAKAYAMA_SOFT_TISSUE_TUMORS_PCA2_DN	81	-0.727041	-2.49754	0.00176367	0.0149503	0.00956095	2144	tags=60%, list=11%, signal=54%	845/284/64102/7079/25802/347/56301/80760/8639/1071/3991/6358/7122/443/364/1066/8908/5733/79987/25840/2719/7123/54873/8322/1675/32/183/477/4881/56920/4915/4023/2819/3479/5806/2354/10351/5166/5502/948/5346/5320/2167/9370/6422/91851/2532/2878/125
DELYS_THYROID_CANCER_DN	232	-0.634895	-2.49282	0.00166113	0.0149503	0.00956095	2672	tags=50%, list=14%, signal=43%	4212/79901/10846/4147/4653/5172/2852/9882/7881/4920/23145/2104/5348/2770/124/7941/845/26575/216/744/9638/223117/5350/2326/1959/6262/3776/1831/3043/347/1908/3087/6383/6444/6567/27445/80760/90627/4223/259217/9467/1634/9590/2619/8639/1410/3908/2302/5588/2009/10404/5764/7173/2675/3491/26034/2791/2327/2042/1958/9934/10370/3815/4005/6358/6886/7122/23768/9079/7049/10810/2192/51299/3400/1902/2719/9256/10…
MARTORIATI_MDM4_TARGETS_NEUROEPITHELIUM_DN	156	-0.665573	-2.48075	0.0017452	0.0149503	0.00956095	2682	tags=48%, list=14%, signal=42%	1955/5019/5569/1073/9734/221687/1995/9024/9805/56884/7305/216/744/429/3488/54332/1524/51435/8851/22902/713/1620/8850/1602/7940/27065/5156/8320/225/5101/8153/222166/9450/6304/2162/23270/27319/1641/6886/644353/9832/2534/912/7903/50861/3400/2824/1436/4661/53335/58494/963/5999/1996/23208/1268/11151/84460/4674/4133/3741/1439/1910/56967/4360/8715/56776/2674/5602/10563/9118/4760/6447/6252/29106
WONG_ENDMETRIUM_CANCER_DN	75	-0.733372	-2.47358	0.00182482	0.0149503	0.00956095	3403	tags=72%, list=18%, signal=59%	10278/6926/5648/1521/4811/1346/11096/139221/2200/140876/57124/6096/57616/56849/55022/117581/3090/7220/6571/25802/26153/83468/1634/25849/1842/92293/7490/5156/286097/862/3082/9934/83716/25927/4692/84502/7216/23768/9079/51761/116362/2202/283383/54361/171024/5178/6424/1910/10439/8406/2159/1804/4969/286133
WALLACE_PROSTATE_CANCER_RACE_UP	278	-0.619262	-2.46852	0.00169779	0.0149503	0.00956095	2453	tags=52%, list=13%, signal=46%	1844/7056/54898/1264/3119/10570/57608/27299/29951/3689/7351/64780/5996/241/2040/3394/1390/25780/10734/80301/728/942/50856/11010/2841/9473/51050/11326/4818/7456/713/712/7482/3001/80760/81578/4046/64092/8477/5551/3122/79746/22797/439921/50852/5334/864/10288/64321/2123/348/7805/9595/26228/2791/1193/9934/9308/6401/3117/26353/7122/913/51338/11040/2533/1880/915/6351/6352/3937/9535/3115/29909/2534/2124/…
BERTUCCI_INVASIVE_CARCINOMA_DUCTAL_VS_LOBULAR_DN	45	-0.782321	-2.42974	0.00178253	0.0149503	0.00956095	2041	tags=67%, list=11%, signal=60%	216/1112/7133/2006/7450/116535/7018/108/5293/4958/6414/5452/5175/23460/161176/947/4239/7010/2078/8404/51705/92241/3479/1805/7148/5166/4804/2167/9370/6422
WAMUNYOKOLI_OVARIAN_CANCER_LMP_DN	190	-0.630578	-2.4137	0.00167224	0.0149503	0.00956095	3486	tags=56%, list=18%, signal=46%	64207/1513/114327/57335/10486/800/55816/399668/56925/2258/3234/22841/26258/26122/7078/7025/9581/5631/7745/23414/5627/7325/5376/1809/1655/5621/80310/51306/9727/121274/128077/157869/1073/5573/2737/81847/10409/9338/9759/7259/55553/79611/57088/85012/29940/490/7782/10457/28962/3043/5742/716/7482/54796/6383/51309/85004/283298/23194/4921/9467/1634/8850/5311/4332/2619/11168/9985/140885/7490/54504/50937/1…
LEIN_NEURON_MARKERS	66	-0.716082	-2.37513	0.00180832	0.0149503	0.00956095	2021	tags=55%, list=11%, signal=49%	6857/2893/63908/6262/534/4747/23349/6638/2596/81553/6595/1958/152789/1123/4644/9746/29993/51617/119/27239/65009/6456/2891/26999/2892/816/7345/6855/51310/1804/55859/285175/6616/6252/5798/1114
RORIE_TARGETS_OF_EWSR1_FLI1_FUSION_DN	28	-0.812552	-2.2726	0.00181159	0.0149503	0.00956095	1415	tags=64%, list=7%, signal=60%	2596/1644/393/1641/5630/8788/54738/3670/8490/1400/5168/7111/9118/3800/23504/6422/7857/1114
ONDER_CDH1_TARGETS_2_UP	251	-0.571647	-2.26609	0.00164474	0.0149503	0.00956095	4146	tags=57%, list=22%, signal=45%	26018/4603/7570/3202/9672/9500/26577/5054/1016/4053/4616/58504/1291/2710/1601/6583/10916/11080/4919/22836/5396/5305/51616/9358/3162/8038/6919/4811/80212/1000/1292/8829/3037/5118/5734/7025/2200/283537/7070/26050/79776/63826/5376/1809/79901/2743/9697/642/55022/29995/6907/3490/11230/55068/26575/22795/1112/6935/83700/1831/8614/8825/2941/7456/6383/4885/3487/155066/90627/4921/1634/9732/8850/84159/5737/…
KANG_GLIS3_TARGETS	36	-0.765635	-2.26406	0.00179211	0.0149503	0.00956095	1384	tags=61%, list=7%, signal=57%	57393/51738/6514/2302/4825/2641/2487/5539/3375/3670/9935/57818/6750/57369/5080/4760/5502/10590/6447/6833/5126/1113
RAMALHO_STEMNESS_DN	69	-0.674578	-2.25131	0.00178253	0.0149503	0.00956095	2647	tags=61%, list=14%, signal=53%	80303/10402/2996/2015/8829/79683/2583/10962/100506736/3689/7305/1215/359845/384/353514/6368/51199/94/9060/340527/3067/3290/4118/140885/2123/9450/7462/122618/8514/29993/1436/963/11151/7535/51466/2891/26999/5788/5579/219972/4684/5649
BOQUEST_STEM_CELL_UP	255	-0.564325	-2.24373	0.00162866	0.0149503	0.00956095	2672	tags=48%, list=14%, signal=42%	4212/5740/79901/80310/4653/27295/54898/55022/4886/10409/5348/9759/5783/9805/8309/26032/284/827/216/715/9638/29940/4629/5350/718/3371/25903/2326/10457/51435/2277/79895/716/3075/347/2949/83468/6383/6444/22873/8516/283298/4921/1634/2619/1410/3908/1842/10178/5789/5737/56944/9936/5156/729/5101/9945/348/6091/23743/8434/83716/1641/26353/443/1066/7216/23768/81035/5157/8910/5176/4958/5325/8839/2192/2252/2…
MCLACHLAN_DENTAL_CARIES_DN	79	-0.650326	-2.22347	0.0017762	0.0149503	0.00956095	2191	tags=51%, list=12%, signal=45%	11201/347733/1010/80055/6857/744/7220/793/9863/283298/2596/10418/5334/23090/5101/3491/23037/55026/1958/6489/3815/50859/4958/2260/2823/2719/10149/9353/27244/4675/7074/2690/477/26999/23089/9378/9452/3800/1804/1363
PICCALUGA_ANGIOIMMUNOBLASTIC_LYMPHOMA_UP	204	-0.573274	-2.21636	0.00166113	0.0149503	0.00956095	3507	tags=53%, list=19%, signal=44%	64759/3766/22836/5396/11167/800/1514/80896/1346/5228/2697/5118/56999/4781/2200/8840/4283/7070/5376/1809/79901/51313/4638/1903/10052/3680/3490/3912/79827/27299/6507/2550/7099/56833/6999/715/3488/718/3371/10457/56603/7145/147463/716/3075/94/713/712/9060/8605/7450/1593/4921/9732/714/2022/1071/79839/2983/91624/1306/5156/10979/64094/83937/348/221395/83758/2/26353/6358/23768/53829/11309/64123/8613/2317…
WANG_LSD1_TARGETS_DN	37	-0.740708	-2.21113	0.00178571	0.0149503	0.00956095	2532	tags=54%, list=13%, signal=47%	694/1154/5864/6857/1959/2277/27445/6812/64377/1958/7216/9699/27344/6616/1363/6860/10814/5126/1113/1114
SHIPP_DLBCL_VS_FOLLICULAR_LYMPHOMA_DN	43	-0.722335	-2.21062	0.00180832	0.0149503	0.00956095	2368	tags=56%, list=13%, signal=49%	7294/9338/11010/2841/1831/1153/5133/959/6489/4064/6358/915/6414/4063/399/1776/4208/3676/969/916/1191/287/2532/6366
SCHUETZ_BREAST_CANCER_DUCTAL_INVASIVE_UP	344	-0.540916	-2.20757	0.00163666	0.0149503	0.00956095	3536	tags=53%, list=19%, signal=44%	10234/2115/9891/64759/4919/1513/5396/11167/9358/3162/8038/800/51226/4811/1292/8829/54829/2207/7078/6446/2882/23462/2200/10346/57205/23414/8840/7091/23643/22881/7070/5627/3123/5997/4212/1809/2149/5621/2028/10846/231/26052/29995/1102/2669/57125/3490/3912/3119/4481/57608/79652/9444/2212/6867/7305/5996/56833/22795/3759/9404/6999/715/1112/3394/57088/29940/753/7220/10257/5350/5797/53346/25903/50856/110…
BOQUEST_STEM_CELL_CULTURED_VS_FRESH_DN	31	-0.769237	-2.19402	0.00179211	0.0149503	0.00956095	1879	tags=74%, list=10%, signal=67%	718/347/80760/9021/54504/929/348/28984/51673/5157/4958/8839/1675/8404/10752/4915/3479/1805/2354/4969/2167/730/125
SWEET_LUNG_CANCER_KRAS_DN	402	-0.526467	-2.17964	0.00158479	0.0149503	0.00956095	3034	tags=43%, list=16%, signal=37%	3384/7078/6649/4781/23462/64388/126/2294/2992/256586/5997/9423/5569/5740/5376/7166/5581/6943/7056/643680/5727/3912/5348/2044/651746/9444/2180/284/140685/216/137835/3707/70/59345/4629/9466/3488/1558/2113/718/2326/4066/2254/6935/654/104/3240/2277/5066/94/9060/154/22998/7450/5787/7140/3290/3340/4223/9467/2034/1634/5311/9590/4332/2022/3908/358/2983/11168/5789/6595/19/219348/5156/64321/10979/3572/6091…
MCLACHLAN_DENTAL_CARIES_UP	237	-0.551435	-2.16528	0.00166945	0.0149503	0.00956095	2275	tags=48%, list=12%, signal=42%	3119/4481/27299/2212/3689/7351/2550/7941/7305/2180/56833/241/3394/7128/7133/718/728/10457/6348/3043/713/712/3487/3109/9021/4689/11156/4046/64092/4332/1230/64581/3122/1117/19/719/1306/54504/929/2123/2357/348/3055/7805/9595/2162/3569/4050/6362/6401/51237/3117/51338/11040/2533/3113/6352/3937/1536/3115/920/2124/912/729230/9332/8832/6039/5175/939/30835/6347/64231/22918/6288/1436/23166/7852/10875/5450/…
FLECHNER_BIOPSY_KIDNEY_TRANSPLANT_REJECTED_VS_OK_UP	86	-0.618907	-2.15679	0.00173611	0.0149503	0.00956095	2168	tags=52%, list=11%, signal=47%	3689/7305/7133/11010/953/11326/11006/713/199/3001/7940/929/26002/7805/9450/3635/11040/25900/915/6352/9535/23240/9332/939/7852/399/1043/963/914/6503/1675/1794/925/313/11151/3587/9770/3059/3936/2219/962/5788/10659/5579/2532
WAMUNYOKOLI_OVARIAN_CANCER_GRADES_1_2_DN	68	-0.642819	-2.14688	0.00176991	0.0149503	0.00956095	3103	tags=54%, list=16%, signal=46%	3234/664/23433/60481/80310/121274/157869/10409/57088/85012/718/3554/22902/3043/5742/51309/9467/9732/11188/4332/2619/7490/23331/10252/6622/23768/139818/56255/23179/284129/3400/3791/7074/152926/140597/10659/1363
REACTOME_IMMUNOREGULATORY_INTERACTIONS_BETWEEN_A_LYMPHOID_AND_A_NON_LYMPHOID_CELL	126	-0.582041	-2.1271	0.00172117	0.0149503	0.00956095	3455	tags=53%, list=18%, signal=44%	8778/1280/340205/2213/3384/22914/27181/29992/4267/910/56253/196500/146722/27180/342510/11027/339390/11025/945/6614/11024/124599/23547/11314/3824/3689/7305/131450/259197/10870/718/353514/11006/975/10219/29121/959/89790/10288/926/3903/10666/10859/146894/4068/915/917/81035/10225/8174/3385/912/919/10990/114836/3820/947/3676/120425/925/911/930/3683/916/6402/4345/933
JAATINEN_HEMATOPOIETIC_STEM_CELL_DN	227	-0.540202	-2.11673	0.00166113	0.0149503	0.00956095	3322	tags=52%, list=18%, signal=43%	3957/800/2153/23178/80896/4811/383/6279/116173/2207/3002/6446/3684/22914/6448/10125/5729/1955/2999/5660/360/79722/57125/814/2212/3689/7305/5996/8807/10734/7128/2113/728/221895/942/50856/1524/2841/353514/5924/8851/50615/6348/129804/4818/3043/7057/10261/3001/4118/64407/4332/6095/8477/5551/1230/64581/10178/50852/154075/91624/926/54504/929/2357/3055/9046/28984/2162/387357/25797/10370/6622/83716/8530/…
KLEIN_TARGETS_OF_BCR_ABL1_FUSION	45	-0.681403	-2.11631	0.00178253	0.0149503	0.00956095	1474	tags=47%, list=8%, signal=43%	4689/4332/23495/1441/3563/2995/6689/695/952/1436/7852/1879/5450/3662/930/3683/5079/10320/5788/973/3575
BROWNE_HCMV_INFECTION_2HR_UP	39	-0.696022	-2.10211	0.00177936	0.0149503	0.00956095	2870	tags=51%, list=15%, signal=44%	126/90634/5997/124/81578/1842/348/2643/1958/3164/2533/25992/4239/1675/8013/107/477/5730/91851/125
HOLLERN_EMT_BREAST_TUMOR_UP	133	-0.573452	-2.09925	0.00173611	0.0149503	0.00956095	3133	tags=54%, list=17%, signal=45%	7106/1134/23187/91754/170482/4035/1601/84752/5396/2213/6355/54329/5118/3002/84734/7025/23414/3142/23129/27163/4147/1073/6483/141/8809/3912/2037/5310/7424/26278/7431/2593/59345/1435/11010/6368/51435/6935/11326/22808/3487/64407/4921/1634/4046/6688/5156/10800/114804/7185/2162/1759/8905/124460/2857/25960/729230/7903/94015/375387/4772/1902/1436/7454/130497/56853/5199/316/322/10439/4360/84935
REACTOME_NEURONAL_SYSTEM	408	-0.506712	-2.09747	0.0015873	0.0149503	0.00956095	3512	tags=39%, list=19%, signal=33%	10382/3768/815/3766/5582/81027/6572/10815/2555/2741/84189/9455/2905/4900/57576/10369/2793/3779/9229/3747/3755/26050/3773/5567/2911/23229/347733/57622/27163/50944/143425/2743/5330/8536/10052/5573/7881/114798/57030/7915/80059/2898/3736/2890/2784/3750/2770/814/320/2037/9647/56479/6507/347731/2550/54413/3759/5864/6857/2893/3084/23236/59345/3748/109/26045/6571/84631/3776/785/5924/6506/610/8825/8001/47…
REACTOME_GENERATION_OF_SECOND_MESSENGER_MOLECULES	30	-0.732554	-2.08489	0.00179533	0.0149503	0.00956095	1519	tags=63%, list=8%, signal=58%	3120/3122/3117/2533/915/3113/917/3937/3118/3115/9402/920/919/7454/7535/51466/916/3702/5063
KEGG_HEMATOPOIETIC_CELL_LINEAGE	84	-0.597708	-2.06386	0.00175131	0.0149503	0.00956095	1948	tags=48%, list=10%, signal=43%	3559/1435/3554/1438/2322/3122/1441/926/929/7173/3563/3590/2811/924/3569/3815/913/915/917/920/912/952/1436/3570/947/3676/1378/914/925/911/921/930/916/2208/951/933/3575/948/931/1380
REN_ALVEOLAR_RHABDOMYOSARCOMA_UP	99	-0.584309	-2.059	0.00174216	0.0149503	0.00956095	2956	tags=41%, list=16%, signal=35%	23462/1184/347733/23554/5569/9745/64208/2778/8732/64397/845/1112/2254/58528/7450/7140/10763/83937/57538/4222/1641/51673/10154/57556/27253/83988/5138/489/51268/1674/3782/1268/26999/7111/55800/4897/9452/26051/10659/9254/4684
KEGG_PRIMARY_IMMUNODEFICIENCY	35	-0.701634	-2.05864	0.00178253	0.0149503	0.00956095	1583	tags=49%, list=8%, signal=45%	29851/23495/959/4261/926/915/3718/920/695/115650/925/930/7535/916/5788/973/3575
KONDO_PROSTATE_CANCER_WITH_H3K27ME3	193	-0.536422	-2.0554	0.00167504	0.0149503	0.00956095	3482	tags=31%, list=18%, signal=25%	54112/2358/57084/5105/114905/9229/22798/139221/2620/84623/7007/57795/2999/7166/6898/160365/57821/219287/59084/51062/942/2254/953/361/4922/125113/1493/2596/959/22797/29974/862/6547/5294/5241/3118/912/6039/10990/2824/23460/7852/3375/120425/2078/460/221692/22806/10350/57818/83857/5168/164832/3603/168537/9844/3702/169026/7373
KEGG_INTESTINAL_IMMUNE_NETWORK_FOR_IGA_PRODUCTION	45	-0.658496	-2.04516	0.00178253	0.0149503	0.00956095	2896	tags=53%, list=15%, signal=45%	10673/3123/608/3119/9020/942/3112/29851/3109/23495/959/3122/3569/3111/3117/3113/3118/3115/8174/7852/940/3676/115650/6387
VERHAAK_GLIOBLASTOMA_PRONEURAL	176	-0.534757	-2.03636	0.00168067	0.0149503	0.00956095	2876	tags=40%, list=15%, signal=34%	79570/23046/9363/5332/7267/23229/8493/50512/10962/10846/26052/55565/80059/57144/10570/2047/81551/54413/8936/744/5027/22983/429/23122/56934/2254/8851/22902/2941/23284/190/4325/9901/81796/6304/90362/5217/1641/18/9379/22843/89853/9839/1272/80319/2823/577/83988/4661/6328/10882/1047/4137/478/4133/2891/1400/53826/4821/8715/2786/78986/9378/5063/1804/55859/4684/11189/23544/29106
MCCLUNG_DELTA_FOSB_TARGETS_8WK	47	-0.652289	-2.03367	0.00182149	0.0149503	0.00956095	1742	tags=43%, list=9%, signal=39%	1183/610/3423/10608/3340/117/1408/4628/25822/9099/9145/4133/9770/3798/2891/9915/2572/3745/5579/2775
SU_THYMUS	20	-0.78954	-2.02766	0.00188679	0.0149503	0.00956095	2816	tags=65%, list=15%, signal=55%	910/27299/3394/2113/9595/913/4068/5293/6504/399/3662/80342/3702
TONKS_TARGETS_OF_RUNX1_RUNX1T1_FUSION_MONOCYTE_DN	55	-0.631535	-2.02756	0.00179533	0.0149503	0.00956095	3391	tags=56%, list=18%, signal=46%	26191/1235/2760/910/5997/3119/27299/753/7402/23062/953/1359/3043/6383/3067/7832/8850/6595/4050/9934/913/10154/29909/3385/5733/7903/10875/3662/911/6285/1545
NAKAYAMA_SOFT_TISSUE_TUMORS_PCA1_DN	76	-0.600116	-2.02643	0.00181488	0.0149503	0.00956095	2053	tags=41%, list=11%, signal=37%	827/8913/1908/4744/4885/80760/2053/79746/6492/7089/22859/4692/7216/57556/8788/5979/2824/27087/10446/1949/32/5178/10439/23089/4915/4023/2819/23504/5502/9370/6422
BIOCARTA_CSK_PATHWAY	20	-0.788214	-2.02426	0.00188679	0.0149503	0.00956095	2769	tags=65%, list=15%, signal=56%	3123/5567/5573/3122/915/917/920/919/5577/7535/916/107/5788
REACTOME_PHOSPHORYLATION_OF_CD3_AND_TCR_ZETA_CHAINS	19	-0.799532	-2.0177	0.00190114	0.0149503	0.00956095	1519	tags=63%, list=8%, signal=58%	3120/3122/3117/915/3113/917/3118/3115/920/919/916/5788
KEGG_CHEMOKINE_SIGNALING_PATHWAY	186	-0.526952	-2.01532	0.00166389	0.0149503	0.00956095	3375	tags=39%, list=18%, signal=33%	1237/1235/2185/3579/2793/6355/3717/399694/4283/5332/5567/6349/5330/6356/9560/2784/2770/643/23236/59345/109/1524/6368/10451/6348/653361/5295/196883/6777/1230/108/409/8503/3055/6362/2791/6361/10000/5294/6358/2268/6351/6352/5293/10663/3718/111/2829/729230/6347/1234/157/6367/7852/7454/23533/1794/7074/1233/2788/107/57580/2786/9844/3702/10563/10235/5579/1236/54331/6387/6366/6363
FINETTI_BREAST_CANCER_KINOME_GREEN	16	-0.835108	-2.01374	0.00192308	0.0149503	0.00956095	1221	tags=62%, list=6%, signal=59%	5588/3055/11040/2268/3718/695/11184/7535/3702/5579
REACTOME_POTASSIUM_CHANNELS	97	-0.571187	-2.00078	0.00178253	0.0149503	0.00956095	3694	tags=49%, list=20%, signal=40%	170850/56659/3788/3768/3766/2793/3779/3747/3755/3773/7881/3736/2784/3750/56479/2550/3759/3748/3776/610/10021/9312/3746/3762/3738/3785/23416/89822/8514/3767/3764/3752/3763/3778/3782/3760/3757/2788/10242/3741/3777/83795/2786/3745/81033/10060/54331/6833
BIOCARTA_TCYTOTOXIC_PATHWAY	12	-0.866751	-1.99365	0.00189753	0.0149503	0.00956095	856	tags=92%, list=5%, signal=88%	7070/3689/915/917/919/940/914/925/3683/916/5788
BIOCARTA_THELPER_PATHWAY	12	-0.864763	-1.98908	0.00189753	0.0149503	0.00956095	856	tags=92%, list=5%, signal=88%	7070/3689/915/917/920/919/940/914/3683/916/5788
REACTOME_TRANSLOCATION_OF_ZAP_70_TO_IMMUNOLOGICAL_SYNAPSE	16	-0.82476	-1.98879	0.00192308	0.0149503	0.00956095	1519	tags=75%, list=8%, signal=69%	3120/3122/3117/915/3113/917/3118/3115/920/919/7535/916
REACTOME_PHASE_0_RAPID_DEPOLARISATION	44	-0.644025	-1.98792	0.00178891	0.0149503	0.00956095	3641	tags=57%, list=19%, signal=46%	29098/815/10369/11280/2258/6334/6326/6335/785/6329/6327/775/6324/2257/776/55799/783/6330/2259/6328/781/55800/6332/816/9254
REACTOME_PD_1_SIGNALING	20	-0.772964	-1.98509	0.00188679	0.0149503	0.00956095	1519	tags=70%, list=8%, signal=64%	80380/3123/3120/5133/3122/3117/915/3113/917/3118/3115/920/919/916
LEIN_LOCALIZED_TO_PROXIMAL_DENDRITES	36	-0.670704	-1.98334	0.00179211	0.0149503	0.00956095	2411	tags=50%, list=13%, signal=44%	57030/3208/25830/64748/3423/6638/4130/54550/9829/51617/8927/4133/4131/2819/9118/3800/287/1114
ONO_AML1_TARGETS_DN	41	-0.647043	-1.97833	0.00176678	0.0149503	0.00956095	2592	tags=51%, list=14%, signal=44%	3682/100506736/2867/1112/1390/975/3487/9021/864/6352/944/729230/8832/114836/1234/7852/3662/914/8835/6402/1236
RICKMAN_HEAD_AND_NECK_CANCER_F	55	-0.615731	-1.97682	0.00179533	0.0149503	0.00956095	2856	tags=42%, list=15%, signal=36%	23414/4606/5569/5740/1917/845/10324/70/347/91624/1674/171024/9201/7060/1545/3479/2273/10351/5166/287/5320/91851/1114
REACTOME_PLATELET_HOMEOSTASIS	85	-0.566931	-1.96728	0.00173913	0.0149503	0.00956095	4159	tags=51%, list=22%, signal=40%	5023/801/57113/5739/4842/5777/492/22953/2793/3779/9127/10846/2778/4846/8654/2784/7225/5027/59345/490/3709/2977/80228/491/2983/2791/6547/2268/5153/5136/2982/5175/5138/3708/489/5026/6543/3778/2788/10242/6546/2786/54331
REACTOME_GLUCAGON_SIGNALING_IN_METABOLIC_REGULATION	32	-0.686798	-1.96661	0.00181818	0.0149503	0.00956095	2750	tags=53%, list=15%, signal=45%	5567/2642/2778/5573/2784/59345/109/196883/108/2791/2641/111/5577/2788/107/2786/54331
KAAB_HEART_ATRIUM_VS_VENTRICLE_UP	254	-0.495264	-1.96542	0.00164474	0.0149503	0.00956095	3050	tags=36%, list=16%, signal=31%	79734/7078/8396/1288/6649/57326/7025/9363/64764/5740/1809/694/4638/9173/4920/11230/10409/23547/83989/715/7431/23236/9638/4629/138046/5322/7220/8237/3554/27112/1952/975/5066/3075/472/8622/6777/23057/4118/4921/2199/25849/2619/57493/2702/8722/6358/23768/54674/8910/7049/8618/8839/2192/185/1490/3400/54738/2202/2562/22846/10875/5138/5354/5142/774/6775/3760/1036/3741/158471/3777/4131/10752/23732/4915/23…
REACTOME_INWARDLY_RECTIFYING_KPLUS_CHANNELS	30	-0.689674	-1.96285	0.00179533	0.0149503	0.00956095	3510	tags=57%, list=19%, signal=46%	3768/3766/2793/3773/2784/2550/3759/3762/3767/3764/3763/3760/2788/2786/10060/54331/6833
HOELZEL_NF1_TARGETS_DN	110	-0.546776	-1.96125	0.0017331	0.0149503	0.00956095	3421	tags=52%, list=18%, signal=43%	11167/494470/84189/11096/220963/7025/64388/83872/2917/7325/10156/79822/4147/54510/9734/57144/151473/79652/55691/5587/753/3488/144165/56548/23284/220108/57118/2977/23194/4916/8642/23090/5156/4325/2675/6304/6489/5176/2192/54550/85453/3953/81849/53335/83643/158326/273/9510/107/1910/91653/4345/9892/6752/5166/10590/730
KEGG_ASTHMA	28	-0.700316	-1.95869	0.00181159	0.0149503	0.00956095	4555	tags=68%, list=24%, signal=52%	3127/8288/3108/3586/2207/3123/6356/3119/2206/3112/3109/959/3122/3111/3117/3113/2205/3118/3115
HAHTOLA_SEZARY_SYNDROM_DN	41	-0.640393	-1.958	0.00176678	0.0149503	0.00956095	2453	tags=49%, list=13%, signal=43%	1844/5727/7294/3824/8807/3394/10451/4818/4145/3560/6351/6352/60468/3820/7704/27244/3003/596/4753/4684
REACTOME_G_ALPHA_Z_SIGNALLING_EVENTS	47	-0.627532	-1.95649	0.00182149	0.0149503	0.00956095	3449	tags=49%, list=18%, signal=40%	5582/152/2793/2778/5581/2784/2770/26575/59345/109/196883/5583/108/5588/2791/111/5999/2788/107/2781/2786/5579/54331
BIOCARTA_TCRA_PATHWAY	12	-0.848546	-1.95178	0.00189753	0.0149503	0.00956095	1347	tags=75%, list=7%, signal=70%	3122/915/917/920/2534/919/7535/916/5788
MORI_MATURE_B_LYMPHOCYTE_UP	84	-0.563119	-1.94443	0.00175131	0.0149503	0.00956095	3122	tags=43%, list=17%, signal=36%	3717/132160/23761/9497/2583/57157/643/3394/2113/246175/23062/54899/23077/3112/154/3109/4689/8477/19/348/10148/3111/7462/9308/25939/4208/64744/4121/3587/2208/3936/9750/6402/5788/931/1380
YU_MYC_TARGETS_DN	52	-0.612404	-1.94218	0.00179533	0.0149503	0.00956095	2532	tags=46%, list=13%, signal=40%	694/100506736/3119/5837/23062/3112/3109/4332/19/6689/4050/122618/912/914/3587/51466/3977/951/10439/640/5788/5579/56605/931
LU_TUMOR_VASCULATURE_DN	13	-0.838495	-1.94151	0.00194175	0.0149503	0.00956095	2995	tags=92%, list=16%, signal=78%	139221/90161/5350/9687/6401/170302/5577/25890/9452/10659/345557/4969
REACTOME_GABA_B_RECEPTOR_ACTIVATION	38	-0.645425	-1.9409	0.00177305	0.0149503	0.00956095	3510	tags=53%, list=19%, signal=43%	3768/3766/2793/3773/2784/2770/2550/3759/109/196883/108/3762/2774/111/3763/3760/2788/107/2786/54331
REACTOME_CARDIAC_CONDUCTION	139	-0.525032	-1.93989	0.0017094	0.0149503	0.00956095	3922	tags=53%, list=21%, signal=42%	6261/10142/4842/5566/29098/56659/56660/3768/815/4882/844/4880/53822/492/10369/11280/2258/6334/6326/3750/5348/845/6335/6263/3759/7220/5350/490/3709/6262/3776/785/6329/30819/28996/8850/80228/491/6327/775/6324/2257/30820/23704/1193/6547/776/55799/89822/486/3767/783/6330/2259/6328/3708/482/489/781/6543/3752/3757/478/6546/477/4881/3777/53826/55800/6332/83795/816/10060/9254
GENTLES_LEUKEMIC_STEM_CELL_UP	28	-0.693519	-1.93968	0.00181159	0.0149503	0.00956095	1459	tags=43%, list=8%, signal=40%	9467/253738/2123/4050/2982/947/4208/26040/3131/474344/168537/22915
LINDGREN_BLADDER_CANCER_CLUSTER_2A_DN	136	-0.524735	-1.93678	0.0017094	0.0149503	0.00956095	3670	tags=41%, list=19%, signal=33%	57589/1601/4154/23710/1808/4189/3981/1827/6446/81689/84969/79960/7325/5376/23479/79901/22927/134265/1073/4856/25861/203197/1266/91607/6480/11010/1831/11228/2941/9021/6812/23621/5090/79966/8639/11168/719/9936/5588/2123/8905/4005/51338/1536/6414/5325/4644/56255/165215/84707/84460/10231/9935/7111/9452/10659
SIG_BCR_SIGNALING_PATHWAY	46	-0.620935	-1.93657	0.00179856	0.0149503	0.00956095	2003	tags=39%, list=11%, signal=35%	5532/3709/975/5295/5336/3635/10000/5293/695/4772/3708/4773/11184/930/596/5788/933/1380
REACTOME_TRANSMISSION_ACROSS_CHEMICAL_SYNAPSES	268	-0.485117	-1.92937	0.00166389	0.0149503	0.00956095	4074	tags=40%, list=22%, signal=32%	6540/140679/2554/1134/801/1145/2558/8541/5566/57554/60482/10382/3768/815/3766/5582/81027/6572/10815/2555/2741/2905/4900/57576/10369/2793/3773/5567/23229/347733/27163/2743/5330/8536/5573/57030/7915/2898/2890/2784/2770/814/320/9647/6507/2550/3759/5864/6857/2893/3084/23236/59345/109/6571/785/5924/6506/8825/8001/4747/1136/196883/6853/6812/108/2566/3762/27330/2899/84254/2791/590/7846/18/55799/22843/68…
LIM_MAMMARY_STEM_CELL_UP	466	-0.461341	-1.92821	0.00156986	0.0149503	0.00956095	3326	tags=44%, list=18%, signal=37%	56895/6909/800/28514/114900/23587/10892/160428/1002/83439/8829/3037/83636/5228/26086/3779/2697/5118/7078/389119/29902/7070/5627/1809/5098/2121/493861/5621/4147/57526/57569/157869/57616/4638/10052/2889/54510/55679/252983/2669/1264/3680/114818/3912/79827/5348/2770/84085/79652/9759/2047/9444/10389/5310/93649/6507/117581/7941/6867/140710/63876/253827/57542/7431/11149/8460/3084/9638/114757/59345/4629/…
REACTOME_INTERACTION_BETWEEN_L1_AND_ANKYRINS	31	-0.674957	-1.92511	0.00179211	0.0149503	0.00956095	2694	tags=55%, list=14%, signal=47%	6334/6326/6335/3897/6329/6327/6324/3785/6330/6328/6710/57731/55800/6332/4897/23114/287
REACTOME_INTEGRATION_OF_ENERGY_METABOLISM	107	-0.540662	-1.92488	0.00176367	0.0149503	0.00956095	2961	tags=41%, list=16%, signal=35%	3747/2740/5567/3630/2642/2778/5330/5573/2784/2770/23236/59345/109/3709/51085/196883/6812/6514/775/108/2791/2641/776/6844/111/3767/783/3708/11069/2864/32/5577/2788/107/6861/2786/3745/773/9254/6616/54331/948/6833/9370
LE_NEURONAL_DIFFERENTIATION_UP	18	-0.775404	-1.92477	0.00192308	0.0149503	0.00956095	2858	tags=78%, list=15%, signal=66%	84557/6326/7881/3750/2550/3776/56934/9627/23208/1268/6861/3745/6447/287
BIOCARTA_CTLA4_PATHWAY	20	-0.749271	-1.92425	0.00188679	0.0149503	0.00956095	1826	tags=60%, list=10%, signal=54%	3123/942/5295/29851/1493/3122/915/917/919/940/916/3702
KEGG_CELL_ADHESION_MOLECULES_CAMS	130	-0.52586	-1.92317	0.0017452	0.0149503	0.00956095	2375	tags=55%, list=13%, signal=48%	1002/1000/3384/3684/80380/4267/3123/24146/4685/3680/6614/3119/3689/54413/5797/942/3897/83700/3112/6900/29851/6383/8516/3109/1493/5133/4359/9369/57555/959/3122/8506/5010/926/3111/6401/3117/10666/7122/9379/3113/22871/3118/23705/3115/920/8174/3385/1272/5175/1003/6693/947/940/923/58494/3676/257194/914/925/3683/57502/6402/4897/5788/9378/57863/933/4684/6403/23114
BONOME_OVARIAN_CANCER_POOR_SURVIVAL_UP	31	-0.673682	-1.92147	0.00179211	0.0149503	0.00956095	2424	tags=68%, list=13%, signal=59%	5412/23411/8504/9652/5151/7881/23741/3488/22998/8925/221981/862/64781/79633/8434/5980/2202/3953/7704/9365/7102
BIOCARTA_NO2IL12_PATHWAY	15	-0.809217	-1.92131	0.00193798	0.0149503	0.00956095	856	tags=67%, list=5%, signal=64%	3717/3594/915/917/920/919/1234/914/6775/916
ZHOU_PANCREATIC_ENDOCRINE_PROGENITOR	14	-0.813874	-1.91901	0.00191205	0.0149503	0.00956095	1769	tags=64%, list=9%, signal=58%	51085/4825/3670/4661/170302/9935/4821/5080/4760
RICKMAN_HEAD_AND_NECK_CANCER_A	99	-0.544243	-1.91782	0.00174216	0.0149503	0.00956095	1589	tags=35%, list=8%, signal=33%	2850/3598/4885/57512/25849/66000/256714/5010/26002/5179/6689/1756/6401/148641/2487/8745/4045/116362/85453/119/84870/57484/171024/596/57502/3977/9915/10439/23089/4897/4345/7345/5806/260436/6422
BORCZUK_MALIGNANT_MESOTHELIOMA_DN	94	-0.549535	-1.91632	0.00177936	0.0149503	0.00956095	2104	tags=35%, list=11%, signal=31%	7434/5368/9912/1359/653361/25802/347/7512/729/2257/7185/221981/2487/9402/6347/952/923/5199/316/80342/930/2208/9744/974/973/933/9214/3575/23544/931/5320/6366/730
PLASARI_TGFB1_SIGNALING_VIA_NFIC_10HR_DN	28	-0.684237	-1.91372	0.00362319	0.0186328	0.011916	1805	tags=54%, list=10%, signal=49%	220/23462/5866/4066/8614/23263/283897/5156/54491/8839/4239/1794/2313/9935/10659
PID_IL12_STAT4_PATHWAY	33	-0.6652	-1.91336	0.00184162	0.0149503	0.00956095	2769	tags=52%, list=15%, signal=44%	3123/9063/8809/30009/8807/5532/3559/942/5551/3122/915/917/920/919/940/6775/916
REACTOME_COMPLEMENT_CASCADE	57	-0.589488	-1.9125	0.00178571	0.0149503	0.00956095	2922	tags=47%, list=15%, signal=40%	721/10747/5627/727/8547/715/718/728/78989/975/716/3075/713/712/714/3004/719/729/1378/1675/5199/930/7448/2219/1191/1380/730
BIOCARTA_NKT_PATHWAY	26	-0.689075	-1.91152	0.00181488	0.0149503	0.00956095	2362	tags=46%, list=13%, signal=40%	8809/6348/1230/959/7043/6351/920/1234/7852/940/1233/1236
REACTOME_INSULIN_PROCESSING	27	-0.687496	-1.91131	0.00373134	0.0189531	0.0121208	1767	tags=41%, list=9%, signal=37%	57393/25924/6844/4644/3798/169026/3800/56605/5122/1363/5126
VILIMAS_NOTCH1_TARGETS_UP	53	-0.59974	-1.90772	0.00181488	0.0149503	0.00956095	1948	tags=43%, list=10%, signal=39%	3559/1959/942/3001/1493/50852/7185/924/1958/9308/915/6352/917/27334/9760/4772/940/914/969/7535/3587/3575/1236
NIKOLSKY_BREAST_CANCER_19Q13.1_AMPLICON	22	-0.717678	-1.90666	0.00182815	0.0149503	0.00956095	4315	tags=82%, list=23%, signal=63%	199704/51276/92285/92283/25850/163087/84503/147923/374899/57711/22835/84911/374900/148268/163115/390927/148266/163255
REACTOME_ANTIGEN_ACTIVATES_B_CELL_RECEPTOR_BCR_LEADING_TO_GENERATION_OF_SECOND_MESSENGERS	30	-0.666657	-1.89735	0.00179533	0.0149503	0.00956095	1900	tags=47%, list=10%, signal=42%	7220/3709/5295/80228/5336/5293/2534/695/3708/930/640/974/973/933
DEURIG_T_CELL_PROLYMPHOCYTIC_LEUKEMIA_DN	305	-0.469367	-1.88936	0.00169492	0.0149503	0.00956095	3277	tags=32%, list=17%, signal=27%	1514/1521/10892/8648/5533/3002/4155/9120/10346/4306/9815/23046/56253/5962/2999/22927/2149/1540/3298/373/9882/9922/25957/1102/38/8809/22884/30009/643/3824/64780/1390/57515/7133/7220/23108/5797/23062/3423/4818/5066/5295/472/29851/154/3001/1493/6095/8477/5551/57493/8611/2791/2643/6489/8530/3560/915/3113/6351/6352/3937/27334/1123/7049/3115/2534/2124/8832/9938/3820/161176/9840/940/1043/5552/914/5142/3…
REACTOME_REGULATION_OF_INSULIN_SECRETION	77	-0.557405	-1.88877	0.00178891	0.0149503	0.00956095	3231	tags=49%, list=17%, signal=41%	152/2793/3747/2740/5567/3630/2778/5330/5573/2784/2770/23236/59345/3709/6812/6514/775/2791/2641/776/6844/111/3767/783/3708/11069/2864/5577/2788/6861/2786/3745/773/9254/6616/54331/948/6833
KEGG_AUTOIMMUNE_THYROID_DISEASE	50	-0.601229	-1.8887	0.00183824	0.0149503	0.00956095	4161	tags=44%, list=22%, signal=34%	3108/3586/7038/356/3002/7253/3123/3119/942/3112/3109/1493/5551/959/3122/7173/3111/3117/3113/3118/3115/940
VILIMAS_NOTCH1_TARGETS_DN	27	-0.678519	-1.88635	0.00373134	0.0189531	0.0121208	3740	tags=67%, list=20%, signal=54%	4353/340205/2213/7177/3684/11025/3689/2040/1215/1438/4145/4689/126364/1441/1511/695/1436/10462
SCHAEFFER_PROSTATE_DEVELOPMENT_48HR_DN	398	-0.455997	-1.88385	0.00159744	0.0149503	0.00956095	3729	tags=44%, list=20%, signal=36%	6092/23221/1004/81832/1601/10602/79819/57568/51555/9891/64207/5396/91409/576/9951/23389/283659/79575/5900/114905/389432/162494/220382/8651/8396/203228/57722/90187/29850/5297/22881/57685/23135/57124/256586/6509/5019/552/4147/85445/57526/1630/51439/256536/6356/1844/367/54510/124842/7881/6483/114798/90139/57125/2890/7225/2044/9759/2047/387758/6507/9865/117154/7305/10100/8936/6263/284654/23683/85458/…
PASQUALUCCI_LYMPHOMA_BY_GC_STAGE_DN	161	-0.503013	-1.88349	0.00173611	0.0149503	0.00956095	2966	tags=38%, list=16%, signal=32%	145226/88455/4606/10125/5567/55024/4033/397/694/8303/1266/54769/203328/2113/56548/246175/8698/54438/9467/6638/4046/9532/57565/2995/55504/64005/7991/22843/152789/9535/29802/60468/7454/80774/1879/5138/55843/53335/3708/5140/91526/143686/11151/84824/930/54440/951/26999/3936/92241/9750/5079/3899/57705/10235/973/933/10659/5579/1236/10814
REACTOME_GABA_RECEPTOR_ACTIVATION	55	-0.586521	-1.88304	0.00179533	0.0149503	0.00956095	4662	tags=55%, list=25%, signal=41%	2785/2567/2557/55879/2554/2558/3768/3766/2555/2793/3773/23229/2784/2770/2550/3759/109/196883/108/2566/3762/2774/111/2562/3763/3760/2788/107/2786/54331
MIKKELSEN_IPS_HCP_WITH_H3_UNMETHYLATED	78	-0.550588	-1.87525	0.00179211	0.0149503	0.00956095	2990	tags=28%, list=16%, signal=24%	56121/26206/56142/5443/1630/57597/140767/25780/85449/84631/50651/26167/6886/3752/148252/266812/6750/116/6752/81033/10060/10590
WEST_ADRENOCORTICAL_TUMOR_MARKERS_DN	20	-0.730103	-1.87502	0.00188679	0.0149503	0.00956095	2444	tags=60%, list=13%, signal=52%	4856/3488/718/1634/4046/2619/10418/5156/2192/54361/2354/125
REACTOME_COSTIMULATION_BY_THE_CD28_FAMILY	66	-0.565157	-1.87454	0.00180832	0.0149503	0.00956095	1826	tags=36%, list=10%, signal=33%	9020/942/5295/29851/3120/1493/5133/3122/8503/10000/3117/915/3113/917/3118/3115/9402/920/2534/151888/919/940/916/5063
MORI_PLASMA_CELL_DN	35	-0.638637	-1.8738	0.00178253	0.0149503	0.00956095	1125	tags=31%, list=6%, signal=30%	7805/6689/9308/4005/60468/89857/9840/53335/115650/933/931
STARK_PREFRONTAL_CORTEX_22Q11_DELETION_UP	191	-0.488719	-1.87289	0.00167224	0.0149503	0.00956095	3819	tags=39%, list=20%, signal=32%	84894/91752/5087/138151/58480/387597/57554/114787/112574/7182/284361/815/5582/494470/7008/2185/23154/84726/353274/51277/1955/51362/150726/57526/22862/57030/2890/2770/6507/10982/5837/23741/6671/114757/490/23413/10501/8851/6506/23077/8825/5295/130399/145567/9369/81553/6595/30845/55504/23467/687/10154/55084/6925/10396/9839/157/27087/7704/1742/4208/83692/29767/1268/8927/478/6546/9806/26999/10439/2855…
TAKADA_GASTRIC_CANCER_COPY_NUMBER_DN	30	-0.658027	-1.87279	0.00179533	0.0149503	0.00956095	2897	tags=43%, list=15%, signal=37%	130752/81617/22862/1102/2898/23189/57105/6595/7436/8745/92949/7010/6456
BIOCARTA_CLASSIC_PATHWAY	14	-0.793586	-1.87118	0.00191205	0.0149503	0.00956095	2922	tags=71%, list=15%, signal=60%	721/727/715/718/716/713/712/714/729/730
REACTOME_CLASS_A_1_RHODOPSIN_LIKE_RECEPTORS	319	-0.461959	-1.87034	0.00167785	0.0149503	0.00956095	3433	tags=32%, list=18%, signal=27%	2358/2587/1237/3355/1235/10316/186/152/155/3579/1241/5734/4987/6915/9290/4852/4283/7253/3792/2151/27199/2834/5729/5443/552/5660/2149/727/3356/2852/1903/84432/3274/680/2867/4886/9294/643/151306/2828/4985/5368/553/64748/718/728/1524/2841/6368/54886/8698/1908/11251/4922/64805/154/5028/57105/51738/8477/1230/5737/719/10800/2357/5179/2359/9002/9934/9890/1880/6352/27334/53829/5539/10663/2829/5733/729230…
SMID_BREAST_CANCER_RELAPSE_IN_LUNG_DN	37	-0.624653	-1.86469	0.00178571	0.0149503	0.00956095	1859	tags=46%, list=10%, signal=42%	7079/4246/25802/7122/54674/3679/6424/3479/8483/1805/7373/10351/5502/2167/9370/2532/125
REACTOME_PEPTIDE_LIGAND_BINDING_RECEPTORS	187	-0.487656	-1.86457	0.00167504	0.0149503	0.00956095	3433	tags=33%, list=18%, signal=27%	2358/2587/1237/1235/10316/186/3579/4987/4852/4283/3792/2151/2834/5443/552/5660/2149/727/2852/84432/680/4886/643/4985/5368/553/718/728/1524/6368/1908/4922/51738/1230/719/2357/5179/2359/9002/6352/5539/10663/2829/729230/185/1234/6288/7852/6869/1233/187/183/1910/6750/10563/6753/6752/1236/6387/2532/6366/6363
CHEN_ETV5_TARGETS_SERTOLI	25	-0.678864	-1.86426	0.00181818	0.0149503	0.00956095	2451	tags=60%, list=13%, signal=52%	7056/411/2212/10457/6368/713/3487/64581/3569/2641/64231/5341/963/948/6387
REACTOME_VOLTAGE_GATED_POTASSIUM_CHANNELS	42	-0.609246	-1.86236	0.00358423	0.0186029	0.0118969	4980	tags=67%, list=26%, signal=49%	3786/3739/27133/9196/3756/26251/90134/3737/170850/3788/3747/3755/7881/3736/3750/56479/3748/9312/3746/3738/3785/23416/8514/3752/3757/3741/3745/81033
HADDAD_T_LYMPHOCYTE_AND_NK_PROGENITOR_DN	63	-0.562242	-1.86205	0.00353357	0.0186029	0.0118969	2130	tags=43%, list=11%, signal=38%	7305/3394/6348/4885/10418/3055/9450/924/2162/4050/3082/1511/9379/8530/1880/5176/6039/64231/1436/9256/3570/6328/5341/1675/3512/3575/1236
REACTOME_NITRIC_OXIDE_STIMULATES_GUANYLATE_CYCLASE	22	-0.700718	-1.8616	0.00365631	0.0186328	0.011916	3119	tags=59%, list=17%, signal=49%	3779/10846/4846/8654/2977/2983/5153/5136/2982/5138/3708/3778/10242
BEGUM_TARGETS_OF_PAX3_FOXO1_FUSION_UP	59	-0.570721	-1.8599	0.00178891	0.0149503	0.00956095	3758	tags=53%, list=20%, signal=42%	5087/5793/81027/23522/11096/8676/6446/7025/2778/57088/5350/10451/1602/1756/2791/10154/54674/4958/27253/3400/2823/9353/1268/4121/5577/10203/9510/3977/23089/64084/6586
KEGG_TYPE_II_DIABETES_MELLITUS	47	-0.595644	-1.85707	0.00182149	0.0149503	0.00956095	3223	tags=51%, list=17%, signal=42%	3101/389692/8651/3630/5581/8913/6517/5295/9021/6514/775/8503/5294/776/5293/3767/23533/2645/774/8835/5602/773/6833/9370
REACTOME_G_ALPHA_I_SIGNALLING_EVENTS	397	-0.450123	-1.8555	0.00161551	0.0149503	0.00956095	3754	tags=35%, list=20%, signal=28%	5566/2826/2868/83875/5144/4035/2840/6751/815/5582/2358/2587/1237/3355/846/1235/2262/10316/186/152/3579/2793/26086/5533/145226/4987/2917/9290/4852/4283/5332/63940/5567/27199/5443/5660/727/2778/5330/2852/5158/1903/5573/9560/4886/2784/2770/814/9294/643/2550/5996/4985/26575/5368/5532/23236/59345/6003/109/718/6000/3709/728/1524/2841/6368/8698/29967/26166/11251/64805/6383/196883/338328/64407/5137/1230/…
MOLENAAR_TARGETS_OF_CCND1_AND_CDK4_UP	61	-0.563799	-1.85456	0.0017762	0.0149503	0.00956095	2818	tags=43%, list=15%, signal=36%	348801/153364/23135/5997/140767/79652/2040/7402/26045/22902/122773/51309/9863/1496/140612/23090/27303/64506/6304/94241/5053/2252/4661/5168/6447/730
WILENSKY_RESPONSE_TO_DARAPLADIB	30	-0.651446	-1.85405	0.00179533	0.0149503	0.00956095	3347	tags=63%, list=18%, signal=52%	3162/80896/2760/3689/7351/7941/653361/1230/409/2123/348/3903/6352/1536/51411/920/2124/729230/962
BOSCO_TH1_CYTOTOXIC_MODULE	112	-0.5175	-1.85402	0.00173913	0.0149503	0.00956095	3133	tags=48%, list=17%, signal=40%	6355/8651/3002/9953/283316/4283/342510/389289/2149/57616/3680/7294/3824/441168/3559/122773/4818/51177/1493/10461/5551/50852/154075/864/5588/2162/84174/9023/55340/4068/29909/6504/23179/10990/79603/1234/952/23166/54757/940/3662/1240/5026/55303/3003/6775/921/596/9915/155038/5168/168537/5243/6752
REACTOME_CHEMOKINE_RECEPTORS_BIND_CHEMOKINES	48	-0.590801	-1.85298	0.00182149	0.0149503	0.00956095	835	tags=40%, list=4%, signal=38%	1237/1235/3579/4283/643/1524/1230/6352/10663/2829/729230/1234/7852/1233/10563/1236/6387/6366/6363
LIM_MAMMARY_LUMINAL_MATURE_DN	92	-0.532249	-1.8529	0.00177305	0.0149503	0.00956095	3690	tags=52%, list=20%, signal=42%	1291/1601/1808/11167/8313/800/1292/9331/220382/4781/2882/7091/4212/2037/6507/10100/55691/7431/8460/1112/114757/3707/144165/2113/25925/79192/128553/2308/51285/1410/10461/81553/121551/10763/26002/348/2995/8434/10580/23024/7049/6347/115207/53335/8404/4915/4023/6422
ZHENG_BOUND_BY_FOXP3	473	-0.442427	-1.85227	0.00155763	0.0149503	0.00956095	2432	tags=28%, list=13%, signal=25%	643680/79722/1102/57157/22884/814/84547/79925/80055/5996/131450/55068/5991/1390/137835/3559/7128/753/85464/6003/2113/23387/7402/490/6480/51311/3709/1524/2841/246175/785/23258/89801/7456/256691/29851/340152/7450/1493/29121/25849/64092/56172/84159/5583/84230/8477/2322/50852/9962/5588/3572/113263/9595/6304/94241/11262/387357/6489/10370/6622/54518/5294/10666/51338/2533/1880/256380/4068/54491/149628/2…
RIGGI_EWING_SARCOMA_PROGENITOR_UP	416	-0.446767	-1.85105	0.00158983	0.0149503	0.00956095	3224	tags=42%, list=17%, signal=36%	30817/155/1002/83439/5228/389432/2624/6770/3384/5734/7025/3684/170261/9394/84969/170463/57722/6915/167681/4306/3995/83872/57685/5997/9465/1836/221662/956/2149/397/2028/727/84898/360/1600/90293/1903/152573/57030/6397/7915/238/9734/4886/2898/163933/57608/8564/2047/4914/5783/3689/81551/55553/151449/112609/91607/55351/10982/201134/6999/5368/1390/5027/3488/6480/3371/53346/56603/145581/57604/104/51365/…
ZHENG_GLIOBLASTOMA_PLASTICITY_DN	56	-0.572785	-1.84999	0.00357782	0.0186029	0.0118969	4434	tags=55%, list=23%, signal=42%	55251/8572/10018/26577/11117/58480/10278/1292/79683/7078/7070/1836/80821/2047/421/22873/10608/11188/1410/10461/3491/10396/4045/5325/1902/3679/4137/5239/5730/2354/1191
PAPASPYRIDONOS_UNSTABLE_ATEROSCLEROTIC_PLAQUE_DN	41	-0.604144	-1.84717	0.00353357	0.0186029	0.0118969	3119	tags=63%, list=17%, signal=53%	3779/2697/6649/29116/5740/4638/4856/387758/92126/26032/23741/70/4629/7145/83700/25802/5066/51285/79974/5311/439921/11142/3400/10186/171024/4131
REACTOME_O_GLYCOSYLATION_OF_TSR_DOMAIN_CONTAINING_PROTEINS	39	-0.611147	-1.84577	0.00355872	0.0186029	0.0118969	3145	tags=54%, list=17%, signal=45%	11096/56999/80731/157869/170689/23145/9507/170692/7057/9508/55901/10418/170690/221981/9719/57188/11095/92949/9037/5199/9510
BOSCO_ALLERGEN_INDUCED_TH2_ASSOCIATED_MODULE	144	-0.495651	-1.84541	0.00168067	0.0149503	0.00956095	3065	tags=42%, list=16%, signal=35%	341019/8651/81689/2615/6448/387496/94120/1540/694/57125/1154/1803/27314/131450/25780/137835/3559/359845/1435/1831/283848/28996/58528/57105/4118/64375/50943/5334/10800/8320/22936/9595/8611/26228/4222/9308/54518/3937/22866/8832/5175/284129/6367/3662/4208/9037/120425/222223/6775/8835/7074/969/8013/596/2208/3512/4897/3702/10320/10563
BIOCARTA_CCR5_PATHWAY	17	-0.748986	-1.8418	0.00191205	0.0149503	0.00956095	836	tags=47%, list=4%, signal=45%	2185/5335/6351/6347/1234/7852/5579/6387
INAMURA_LUNG_CANCER_SCC_DN	14	-0.780264	-1.83976	0.00191205	0.0149503	0.00956095	1717	tags=57%, list=9%, signal=52%	104/7450/51285/57188/11095/81849/5239/10351
FARMER_BREAST_CANCER_CLUSTER_1	38	-0.611727	-1.83957	0.0035461	0.0186029	0.0118969	1794	tags=55%, list=10%, signal=50%	2841/3001/9595/51237/4068/915/3937/9535/29909/729230/1234/952/5450/55303/914/3003/925/3587/3512/962/3702
MIKKELSEN_MCV6_HCP_WITH_H3K27ME3	424	-0.443349	-1.83869	0.00159236	0.0149503	0.00956095	2748	tags=34%, list=15%, signal=30%	2911/140730/2834/6334/2894/5740/50512/2676/84966/150726/57699/134265/121274/114134/256536/4856/55509/8291/4004/163933/79827/30009/7480/10570/9024/8808/2047/91608/151449/146713/196740/9427/83482/284654/3394/9956/8913/64067/59345/441151/3748/6571/221895/170692/159296/3897/57540/220164/430/654/64405/23077/79192/1795/6900/94/1136/4744/344558/7482/9607/56301/23349/4885/84867/5787/252995/51285/25924/49…
REACTOME_GPCR_LIGAND_BINDING	451	-0.440034	-1.83691	0.00156986	0.0149503	0.00956095	3433	tags=32%, list=18%, signal=27%	2358/2587/1237/3355/846/1235/10316/5745/2015/186/152/30817/155/3579/1241/2793/50846/5734/4987/2740/6915/2917/9290/4852/4283/7253/3792/2151/2911/27199/2834/6608/5729/5443/552/5660/2149/727/2642/2778/3356/2852/1903/84658/84432/3274/5727/680/2867/4886/2784/7480/9294/643/151306/2828/2550/7434/1392/4985/5368/59345/553/64748/718/728/1524/2841/1393/6368/54886/8698/7432/1908/11251/4922/64805/7482/154/502…
TURASHVILI_BREAST_DUCTAL_CARCINOMA_VS_LOBULAR_NORMAL_DN	64	-0.55463	-1.83674	0.00357782	0.0186029	0.0118969	1996	tags=45%, list=11%, signal=41%	5174/4629/51050/256691/80726/1410/84668/5764/83690/199920/10580/23705/3400/60468/2824/6288/7704/441027/1675/23336/171024/2690/477/4256/4915/5063/2354/6422/125
WANG_IMMORTALIZED_BY_HOXA9_AND_MEIS1_DN	22	-0.690906	-1.83553	0.00365631	0.0186328	0.011916	2395	tags=55%, list=13%, signal=48%	2669/10100/2322/9450/6304/939/22918/1879/947/2078/10203/3575
ZHAN_MULTIPLE_MYELOMA_PR_DN	48	-0.585179	-1.83535	0.00182149	0.0149503	0.00956095	3027	tags=44%, list=16%, signal=37%	7799/8651/4306/5098/150365/1540/7942/25780/8850/84159/5334/6304/1272/134111/23492/91526/64744/152926/374403/4133/78986
KEGG_CYTOKINE_CYTOKINE_RECEPTOR_INTERACTION	262	-0.461601	-1.83464	0.00165289	0.0149503	0.00956095	2455	tags=29%, list=13%, signal=26%	6356/9560/8809/4049/60401/608/643/1440/943/8807/7424/3559/7133/80301/1435/1524/6368/3554/50615/6348/2277/1896/1438/94/23495/2322/1230/959/1441/5156/7173/3572/3563/7043/55504/3590/3569/4050/6362/6361/3082/3815/6358/2324/3560/6351/6352/10663/944/2829/729230/11009/1271/939/6347/1234/3791/3953/6367/1436/7852/3570/5618/115650/1233/3587/1439/2690/3977/3952/10563/3575/1236/6387/4804/6366/6363
KEGG_SYSTEMIC_LUPUS_ERYTHEMATOSUS	55	-0.571417	-1.83455	0.00359066	0.0186029	0.0118969	2922	tags=45%, list=15%, signal=39%	721/3123/727/3119/2212/715/718/942/3112/716/713/712/3109/714/959/3122/729/1511/3111/3117/3113/3118/3115/940/730
BIOCARTA_COMP_PATHWAY	19	-0.726378	-1.83309	0.00380228	0.0192924	0.0123378	3285	tags=74%, list=17%, signal=61%	720/5648/721/10747/727/715/718/716/713/712/714/729/1675/730
MORI_LARGE_PRE_BII_LYMPHOCYTE_DN	56	-0.567517	-1.83298	0.00357782	0.0186029	0.0118969	2229	tags=43%, list=12%, signal=38%	643/6646/10507/3394/23062/54899/7456/3109/8477/401612/9450/4050/7462/9308/1269/25939/1794/3587/3936/9750/5788/974/933/931
KEGG_TYPE_I_DIABETES_MELLITUS	41	-0.599049	-1.83159	0.00353357	0.0186029	0.0118969	3025	tags=49%, list=16%, signal=41%	3002/3123/3630/4049/3119/942/3112/3109/5799/5551/3122/3111/3117/3113/3118/3115/940/2572/1363/5798
ONO_FOXP3_TARGETS_DN	42	-0.599121	-1.83141	0.00358423	0.0186029	0.0118969	2393	tags=48%, list=13%, signal=42%	100506736/84868/2867/1112/3487/3001/864/8320/9934/6352/10663/7049/29909/944/8832/114836/7852/3662/596/6402
ACEVEDO_LIVER_CANCER_WITH_H3K27ME3_UP	278	-0.459118	-1.83015	0.00169779	0.0149503	0.00956095	3396	tags=36%, list=18%, signal=30%	7097/283659/253935/160364/800/114821/186/22987/58511/11280/220963/341019/139221/4781/22914/133121/256586/5621/397/285025/2743/93035/375449/9173/1010/84868/1310/10321/6507/140685/253827/10324/5587/137835/23635/51311/3776/5066/89795/22998/80760/57520/84230/64581/23357/11281/57631/5588/9435/57573/221806/221395/79689/23037/4093/9595/26034/6304/57562/3569/158880/387357/255928/10000/9890/2641/80031/800…
KUROZUMI_RESPONSE_TO_ONCOCYTIC_VIRUS	43	-0.597839	-1.82961	0.00361664	0.0186328	0.011916	3317	tags=60%, list=18%, signal=50%	1235/3579/6355/3684/4283/4049/643/7133/718/6368/6348/1230/959/3572/4050/3560/6352/2829/6347/1234/6367/3570/1233/3587/3603/1236
REACTOME_NEUROTRANSMITTER_RECEPTORS_AND_POSTSYNAPTIC_SIGNAL_TRANSMISSION	203	-0.470928	-1.82294	0.00165563	0.0149503	0.00956095	3512	tags=35%, list=19%, signal=29%	10382/3768/815/3766/5582/81027/2555/2741/2905/4900/57576/10369/2793/3773/5567/23229/347733/2743/5330/8536/5573/2898/2890/2784/2770/814/320/9647/2550/3759/2893/3084/23236/59345/109/5924/8825/8001/4747/1136/196883/108/2566/3762/27330/2899/84254/2791/7846/22843/2774/111/5923/2562/83988/2901/1742/3763/1740/3760/1141/5577/4137/2788/107/2891/2892/2786/816/5579/54331/7102
PID_CD8_TCR_DOWNSTREAM_PATHWAY	65	-0.548406	-1.82123	0.00358423	0.0186029	0.0118969	2003	tags=28%, list=11%, signal=25%	5532/3559/5551/926/5588/8320/1958/3560/915/917/919/5778/4772/6775/925/4773/916/5579
REACTOME_GLUCAGON_TYPE_LIGAND_RECEPTORS	32	-0.635956	-1.82103	0.00363636	0.0186328	0.011916	3138	tags=50%, list=17%, signal=42%	2793/2740/2642/2778/2784/7434/59345/7432/117/9340/2791/2641/2788/116/2786/54331
BOYAULT_LIVER_CANCER_SUBCLASS_G3_DN	52	-0.573872	-1.81998	0.00359066	0.0186029	0.0118969	3285	tags=46%, list=17%, signal=38%	5648/1757/1346/433/7915/38/79652/2822/2593/2155/5295/3075/1593/6514/7018/6595/9936/219654/23371/55340/5176/164656/187/53826
REACTOME_PEPTIDE_HORMONE_METABOLISM	90	-0.52305	-1.81952	0.00177305	0.0149503	0.00956095	2661	tags=38%, list=14%, signal=33%	5443/2999/3630/2028/2784/1803/7941/1215/57393/1359/25924/90701/619373/51738/590/1511/2641/139760/1066/6844/4644/3670/2864/183/3798/3952/5080/3479/169026/3800/56605/5122/1363/5126
PID_TCR_PATHWAY	65	-0.547755	-1.81907	0.00358423	0.0186029	0.0118969	3938	tags=51%, list=21%, signal=40%	1326/2885/5777/9846/7409/83593/10892/5335/10125/3123/5581/9020/942/3122/5588/84174/2533/915/917/3937/9402/920/2534/919/7454/940/11184/7535/916/3702/10235/5788/5579
WIKMAN_ASBESTOS_LUNG_CANCER_DN	28	-0.64958	-1.81679	0.00362319	0.0186328	0.011916	2043	tags=39%, list=11%, signal=35%	55335/942/472/50852/729230/4644/64231/10875/3676/9935/474344
ZHAN_MULTIPLE_MYELOMA_CD2_UP	44	-0.588428	-1.81631	0.00357782	0.0186029	0.0118969	2590	tags=45%, list=14%, signal=39%	23035/8732/1102/29951/5368/3707/6003/79656/6383/3908/944/8613/29802/939/115650/1268/6546/5079/973/931
KEGG_ABC_TRANSPORTERS	44	-0.586231	-1.80953	0.00357782	0.0186029	0.0118969	1897	tags=32%, list=10%, signal=29%	10257/10349/21/9429/5244/19/225/23461/23460/10350/5243/10060/10351/6833
ZHENG_FOXP3_TARGETS_IN_T_LYMPHOCYTE_DN	38	-0.600734	-1.80651	0.0035461	0.0186029	0.0118969	3917	tags=58%, list=21%, signal=46%	64919/51611/388650/5128/51735/2185/1102/7402/7456/29121/6304/6489/51338/256380/5733/60468/64231/9840/91526/596/5788/1363
LEE_TARGETS_OF_PTCH1_AND_SUFU_DN	84	-0.523093	-1.80622	0.00175131	0.0149503	0.00956095	2398	tags=50%, list=13%, signal=44%	5582/51286/5648/114900/2697/9581/7070/9723/140767/2890/22924/10100/10982/5864/6857/8913/63908/793/4744/9369/491/6095/767/5179/23048/6844/2982/869/254263/57282/3708/65009/9201/6546/10231/3798/9806/64084/5730/27344/4684/547
LIAN_LIPA_TARGETS_6M	77	-0.532512	-1.80442	0.00357782	0.0186029	0.0118969	2273	tags=42%, list=12%, signal=37%	4481/2212/7941/5996/7402/26253/353514/10457/11006/713/712/10261/51284/25924/714/1230/719/79689/2289/4063/4644/8832/3820/64231/6288/4327/84707/5199/58475/9935/219972/547
REACTOME_G_PROTEIN_MEDIATED_EVENTS	52	-0.568584	-1.80321	0.00359066	0.0186029	0.0118969	2812	tags=44%, list=15%, signal=38%	5332/5567/5330/5573/2770/814/23236/109/3709/196883/5137/108/84254/5153/5136/2774/111/3708/5577/107/2781/816/2775
WANG_CLASSIC_ADIPOGENIC_TARGETS_OF_PPARG	28	-0.644519	-1.80264	0.00362319	0.0186328	0.011916	2098	tags=43%, list=11%, signal=38%	2180/216/85329/3290/2053/364/1675/4023/729359/948/2167/9370
LEE_EARLY_T_LYMPHOCYTE_DN	56	-0.557589	-1.80091	0.00357782	0.0186029	0.0118969	2579	tags=41%, list=14%, signal=36%	1540/9882/79722/9466/2308/472/154075/9595/1880/54674/29909/151888/939/25939/3570/55303/170575/4773/4753/1901/57134/168537/1236
DURAND_STROMA_S_UP	291	-0.450342	-1.80029	0.00171527	0.0149503	0.00956095	2839	tags=37%, list=15%, signal=32%	11043/2620/57124/84623/11238/26108/23129/5866/5376/1809/2583/64208/79822/6096/4147/2852/780776/1519/9173/4920/7480/6507/114991/23266/8807/22795/827/5587/2255/1558/6480/133022/109/3554/56603/1831/1795/610/1896/57689/55790/23237/6853/158866/6660/8639/116535/57537/168667/23357/6324/30845/166614/5156/10763/5764/253738/9435/64094/22936/27330/8611/221981/90362/79884/79633/249/114805/26353/2533/5153/513…
KANG_IMMORTALIZED_BY_TERT_DN	101	-0.508588	-1.7995	0.00173913	0.0149503	0.00956095	3482	tags=48%, list=18%, signal=39%	54112/220/50939/7700/1000/8829/8534/29906/4987/126/2917/23414/5376/2676/7543/2642/10846/4886/54221/7128/5274/5742/9508/1759/2/687/3164/7049/8839/5521/6347/2260/7852/6693/51156/1960/9459/1043/8490/1268/8013/2690/9935/7060/4915/10235/10060/4969
NABA_ECM_GLYCOPROTEINS	195	-0.469605	-1.79938	0.0016835	0.0149503	0.00956095	3269	tags=42%, list=17%, signal=35%	2244/347252/4811/220001/203522/5118/22798/2200/90187/4054/83872/8840/9423/8292/7007/4147/157869/4856/9211/23145/3490/3912/129080/54084/84628/22795/284654/3488/3371/133584/2006/163175/256158/129804/7057/7450/3487/285313/2199/5212/3908/1842/10418/168667/64094/221806/83690/3491/83716/79812/25992/89932/203190/8839/2192/1490/6585/2202/79987/55203/10875/84870/4239/64093/9353/7143/8404/10516/4753/7448/4…
LIAN_LIPA_TARGETS_3M	61	-0.54616	-1.79654	0.0035524	0.0186029	0.0118969	2273	tags=46%, list=12%, signal=41%	4481/2212/7941/5996/7402/26253/353514/10457/11006/713/712/10261/51284/714/1230/719/79689/2289/4063/4644/3820/64231/6288/4327/5199/58475/9935/219972
GUENTHER_GROWTH_SPHERICAL_VS_ADHERENT_UP	22	-0.67602	-1.79598	0.00548446	0.0248317	0.0158803	1736	tags=41%, list=9%, signal=37%	1952/23284/10763/5803/894/4133/2891/1400/27344
REACTOME_OPIOID_SIGNALLING	86	-0.51479	-1.79396	0.00173611	0.0149503	0.00956095	3138	tags=44%, list=17%, signal=37%	5566/5144/815/5582/2793/5533/5332/5567/5443/5330/5573/2784/2770/814/5532/23236/59345/109/3709/196883/5137/108/84254/2791/5153/5136/2774/111/3708/5142/5577/2788/107/2781/2786/816/2775/54331
BIOCARTA_PAR1_PATHWAY	19	-0.710758	-1.79367	0.00570342	0.0257233	0.0164504	3266	tags=53%, list=17%, signal=44%	2185/2149/4660/2768/23236/5295/9002/5294/107/5579
REACTOME_VASOPRESSIN_REGULATES_RENAL_WATER_HOMEOSTASIS_VIA_AQUAPORINS	42	-0.586658	-1.79332	0.00358423	0.0186029	0.0118969	3138	tags=48%, list=17%, signal=40%	2793/22841/5567/2778/360/5573/2784/59345/109/361/196883/358/108/2791/111/5577/2788/107/2786/54331
BIOCARTA_IL17_PATHWAY	15	-0.753729	-1.78957	0.00581395	0.0261712	0.0167369	1058	tags=67%, list=6%, signal=63%	1440/3569/915/917/920/919/947/914/925/916
NAKAYAMA_SOFT_TISSUE_TUMORS_PCA1_UP	75	-0.530038	-1.78776	0.00182482	0.0149503	0.00956095	2293	tags=51%, list=12%, signal=45%	6614/3119/2212/2550/56833/718/10457/11326/716/3075/713/712/7057/199/3001/4689/1634/3122/929/2162/3117/51338/10859/3113/6352/51411/8839/9332/6347/2202/1436/55843/1043/6503/3003/1794/3071/4360
ODONNELL_METASTASIS_UP	72	-0.530676	-1.7877	0.0035524	0.0186029	0.0118969	3854	tags=44%, list=20%, signal=36%	4430/4774/1004/1280/2624/245812/90634/5332/2889/10409/2246/9501/5310/90273/5375/5071/11248/785/1896/8844/90627/55901/11278/8643/3762/27147/3164/2562/23533/10391/22861/23544
IIZUKA_LIVER_CANCER_EARLY_RECURRENCE	11	-0.794632	-1.78435	0.00187266	0.0149503	0.00956095	2991	tags=82%, list=16%, signal=69%	6446/10346/7431/7128/3122/5156/7805/894/4208
KEGG_NEUROACTIVE_LIGAND_RECEPTOR_INTERACTION	271	-0.448218	-1.78141	0.00169492	0.0149503	0.00956095	4593	tags=44%, list=24%, signal=33%	1132/2567/151/2557/1394/1135/2565/886/1813/1133/624/2696/135/55879/5023/1395/2554/1134/84634/1129/1145/4889/2558/5739/7433/2912/887/6751/2358/2587/2555/3355/10316/2741/5745/22953/186/2905/152/155/1241/5734/4987/2740/6915/2917/7253/2151/2911/2834/5729/2894/9127/552/2149/2642/2743/3356/1903/3274/2908/680/4886/2898/2890/9294/2550/7434/4985/2893/5027/553/728/8698/8001/1136/154/5028/3001/57105/117/573…
NABA_CORE_MATRISOME	274	-0.448526	-1.78123	0.00172117	0.0149503	0.00956095	3413	tags=39%, list=18%, signal=33%	148113/84034/1280/50939/2244/347252/4811/220001/1292/203522/54829/340267/5118/1288/22798/2200/90187/4054/83872/8840/9423/8292/7007/131873/4147/84570/157869/4856/9211/23145/3490/3912/129080/1310/54084/84628/22795/284654/3488/3371/133584/91522/136227/2006/163175/256158/129804/7057/7450/3487/285313/81578/1634/2199/5212/1285/1286/3908/1842/10418/168667/1306/64094/221806/83690/3491/83716/79812/25992/8…
BIOCARTA_LAIR_PATHWAY	17	-0.723931	-1.78019	0.00573614	0.0258458	0.0165288	2587	tags=53%, list=14%, signal=46%	727/3689/718/729/3569/3676/3683/6403/730
KIM_GERMINAL_CENTER_T_HELPER_UP	63	-0.536414	-1.77651	0.00353357	0.0186029	0.0118969	2750	tags=38%, list=15%, signal=33%	5567/64393/9882/5532/26207/2113/1959/1389/28962/64921/283455/1117/8905/4628/4068/7903/8832/9760/89857/5450/55303/4121/10563/1114
PLASARI_TGFB1_TARGETS_10HR_DN	248	-0.448954	-1.77457	0.00166113	0.0149503	0.00956095	2995	tags=42%, list=16%, signal=35%	139221/34/4781/167681/254228/2620/116931/154043/4591/79776/8633/4212/5376/79822/57569/1903/7056/1102/8654/9338/57728/9420/401494/54769/10194/27314/168544/744/85458/25780/23236/2593/3488/25925/353514/6368/51435/2277/11006/5295/22873/23194/9467/140612/84159/2619/116535/358/5789/6595/719/1644/8503/5156/5101/253738/3572/2123/4325/221981/862/79633/5136/54674/9079/166336/7049/23066/93986/2252/9760/2291…
BIOCARTA_LECTIN_PATHWAY	12	-0.768752	-1.76824	0.00948767	0.0369772	0.0236475	3857	tags=67%, list=20%, signal=53%	720/5648/721/10747/727/718/729/730
MINGUEZ_LIVER_CANCER_VASCULAR_INVASION_DN	21	-0.67923	-1.76812	0.0093633	0.0365928	0.0234017	4471	tags=67%, list=24%, signal=51%	10157/7763/5444/10249/7366/1807/5105/127/10747/4638/5295/5053/687/55089
KLEIN_PRIMARY_EFFUSION_LYMPHOMA_DN	57	-0.544359	-1.76609	0.00357143	0.0186029	0.0118969	2962	tags=54%, list=16%, signal=46%	2882/3995/4033/7915/3119/643/9805/10982/3394/2113/6480/3109/4689/9467/7832/971/11142/6689/27240/23240/5452/939/53335/1043/930/9770/9750/974/973/933/931
REACTOME_GLUCAGON_LIKE_PEPTIDE_1_GLP1_REGULATES_INSULIN_SECRETION	41	-0.577489	-1.76567	0.00353357	0.0186029	0.0118969	3138	tags=46%, list=17%, signal=39%	2793/3747/2740/5567/2778/5573/2784/59345/3709/2791/2641/111/3708/11069/5577/2788/2786/3745/54331
REACTOME_MUSCLE_CONTRACTION	207	-0.456664	-1.76325	0.00168919	0.0149503	0.00956095	4083	tags=49%, list=22%, signal=39%	30818/801/7094/3672/6261/10142/4842/5566/7273/29098/58498/56659/56660/3768/815/4882/844/4880/53822/492/800/10369/11280/2258/140465/8557/4606/6334/6326/4621/4638/8291/3750/5348/845/6335/6263/3759/7431/70/4629/7220/5350/490/3709/6262/3776/785/6329/30819/25802/28996/2977/7140/8850/80228/491/2983/6327/775/6324/2257/1756/30820/23704/1193/6547/10580/776/55799/89822/486/2982/3767/783/6330/2259/6328/3708…
REACTOME_CA_DEPENDENT_EVENTS	36	-0.595919	-1.76219	0.00358423	0.0186029	0.0118969	4040	tags=50%, list=21%, signal=39%	801/5566/815/5582/5567/5573/814/109/196883/5137/108/84254/5153/5136/111/5577/107/816
CROONQUIST_NRAS_SIGNALING_UP	38	-0.585932	-1.762	0.0035461	0.0186029	0.0118969	2441	tags=55%, list=13%, signal=48%	8303/4481/942/1524/10457/6348/7512/9450/8611/9899/6351/6352/1536/729230/7903/23158/6039/2824/2208/3512/962
REACTOME_G_PROTEIN_ACTIVATION	26	-0.634671	-1.7606	0.00544465	0.0246753	0.0157803	3138	tags=42%, list=17%, signal=35%	2793/5443/2784/2770/59345/2791/2788/2781/2786/2775/54331
PID_CD8_TCR_PATHWAY	53	-0.553436	-1.76043	0.00362976	0.0186328	0.011916	3938	tags=51%, list=21%, signal=40%	1326/2885/5777/7409/83593/10892/5335/10125/5581/9020/942/5551/926/5588/915/917/3937/9402/2534/919/940/925/7535/916/10235/5788/5579
BIOCARTA_BLYMPHOCYTE_PATHWAY	12	-0.76499	-1.75959	0.0113852	0.0424651	0.0271571	3304	tags=67%, list=18%, signal=55%	2213/3123/3689/3122/1378/3683/5788/1380
BOQUEST_STEM_CELL_DN	213	-0.451299	-1.75923	0.00164474	0.0149503	0.00956095	2769	tags=46%, list=15%, signal=39%	3123/9710/4033/23554/10156/375449/26052/7056/6397/8809/3119/57608/51293/1440/1390/25780/26207/7133/22900/6480/5797/51365/79772/54438/51294/3087/10019/154/7450/5787/23263/25924/4855/2022/5583/3122/358/8578/8503/64321/3563/51267/26468/7805/54922/256949/83483/221981/2791/4222/6401/4005/3117/6358/7122/79812/55340/3113/3937/64123/57556/9535/3115/51299/79750/27253/23158/7075/5175/80177/3791/1003/22918/…
KEGG_T_CELL_RECEPTOR_SIGNALING_PATHWAY	108	-0.491421	-1.75177	0.00176991	0.0149503	0.00956095	2279	tags=31%, list=12%, signal=28%	57144/9020/5532/10451/5295/29851/1493/5133/959/6300/8503/926/5588/5600/10000/5294/915/917/3937/5293/9402/920/2534/919/4772/23533/940/925/4773/7535/916/3702/5788/5063
REACTOME_DAG_AND_IP3_SIGNALING	40	-0.576481	-1.74814	0.0035524	0.0186029	0.0118969	3754	tags=55%, list=20%, signal=44%	801/5566/815/5582/5335/5567/5581/5573/814/109/3709/196883/5137/108/84254/5153/5136/111/3708/5577/107/816
BIOCARTA_ACE2_PATHWAY	13	-0.754742	-1.74758	0.0116505	0.0431623	0.027603	3325	tags=62%, list=18%, signal=51%	59272/186/1288/1215/1285/1286/185/183
REACTOME_ADRENALINE_NORADRENALINE_INHIBITS_INSULIN_SECRETION	27	-0.628451	-1.74716	0.00559701	0.0252678	0.0161592	2300	tags=52%, list=12%, signal=46%	152/2793/2784/2770/59345/775/2791/776/111/783/2788/2786/9254/54331
KUROZUMI_RESPONSE_TO_ONCOCYTIC_VIRUS_AND_CYCLIC_RGD	20	-0.679623	-1.74538	0.0113208	0.0424119	0.0271231	3375	tags=65%, list=18%, signal=53%	3586/1237/3579/4283/6356/4049/1230/959/3560/1234/6367/1233/3587
STARK_HYPPOCAMPUS_22Q11_DELETION_UP	50	-0.554795	-1.74283	0.00367647	0.0187151	0.0119686	3684	tags=48%, list=20%, signal=39%	81832/284361/22895/9331/9110/353274/80315/22848/6483/57030/22990/535/25903/8851/3423/6812/2034/51560/8506/6844/27087/1740/8927/9201
TONKS_TARGETS_OF_RUNX1_RUNX1T1_FUSION_SUSTAINED_IN_MONOCYTE_DN	10	-0.801849	-1.74254	0.00187617	0.0149503	0.00956095	2752	tags=70%, list=15%, signal=60%	5997/3043/3067/4050/10154/6285/1545
HASLINGER_B_CLL_WITH_MUTATED_VH_GENES	18	-0.701871	-1.74224	0.00961538	0.0372796	0.0238409	1469	tags=56%, list=8%, signal=51%	6932/5023/79888/4118/23641/5101/1756/6504/3587/4023
KORKOLA_EMBRYONIC_CARCINOMA_VS_SEMINOMA_DN	22	-0.65543	-1.74128	0.00731261	0.0303695	0.0194218	1709	tags=45%, list=9%, signal=41%	221662/79192/7482/64506/64321/1756/3815/10516/8115/27344
VERHAAK_AML_WITH_NPM1_MUTATED_DN	240	-0.441429	-1.74003	0.00165563	0.0149503	0.00956095	2268	tags=38%, list=12%, signal=33%	2770/79652/9805/55351/5996/8936/23683/29940/4629/753/109/23635/5797/53346/2308/5066/55790/58528/8938/6638/1602/10418/4261/8642/1441/439921/30845/7436/864/6091/2995/6689/924/221981/26228/862/3082/10252/6622/3815/3117/9379/8530/915/3113/54491/2205/5064/4037/5176/8788/3115/894/729230/9760/952/2824/2260/9145/9256/947/4208/5026/5270/5140/914/51162/2078/5142/969/25999/4121/911/930/2788/7535/51466/10462…
LU_AGING_BRAIN_DN	151	-0.467417	-1.73991	0.0017331	0.0149503	0.00956095	3487	tags=37%, list=18%, signal=30%	6416/815/5582/5800/10486/5306/23468/2258/3631/7070/51362/3356/6782/6843/57030/2890/814/1392/5864/23646/8851/64405/1954/534/793/25849/491/81553/6595/6327/27065/5179/2675/2257/22843/10396/11076/1272/783/5923/2562/64061/4208/1780/5999/4137/11151/29114/4133/4131/6750/3745/9378/5579/287/1114
REACTOME_ADENYLATE_CYCLASE_ACTIVATING_PATHWAY	10	-0.797069	-1.73216	0.00187617	0.0149503	0.00956095	1880	tags=60%, list=10%, signal=54%	109/196883/108/2774/111/107
PID_FCER1_PATHWAY	59	-0.531076	-1.7307	0.00357782	0.0186029	0.0118969	3593	tags=37%, list=19%, signal=30%	9846/7409/6416/2213/2207/5335/5783/2206/5295/7456/8611/7462/3937/2205/1843/2534/695/4773/3059/1901/3702/5579
REACTOME_PKA_ACTIVATION_IN_GLUCAGON_SIGNALLING	17	-0.703666	-1.73035	0.00764818	0.0315665	0.0201873	2750	tags=59%, list=15%, signal=50%	5566/5567/2778/5573/109/196883/108/111/5577/107
MCDOWELL_ACUTE_LUNG_INJURY_DN	45	-0.556625	-1.72877	0.00356506	0.0186029	0.0118969	3150	tags=38%, list=17%, signal=32%	8829/3384/23462/126/727/2246/1803/94/4223/9435/55504/4137/187/10462/23136/2273/6387
REACTOME_G_PROTEIN_GATED_POTASSIUM_CHANNELS	24	-0.640043	-1.72832	0.00931099	0.0364628	0.0233186	3510	tags=54%, list=19%, signal=44%	3768/3766/2793/3773/2784/2550/3759/3762/3763/3760/2788/2786/54331
REACTOME_PROTEIN_PROTEIN_INTERACTIONS_AT_SYNAPSES	87	-0.496763	-1.72713	0.00175747	0.0149503	0.00956095	3265	tags=45%, list=17%, signal=37%	84189/9455/2905/9229/26050/2911/57622/50944/143425/114798/80059/2890/320/2037/347731/54413/6857/2893/26045/84631/8825/6812/4916/9369/57555/5789/58512/9379/22871/85358/94030/1742/1740/5802/57502/23136/2892/9066/9378
JIANG_AGING_HYPOTHALAMUS_DN	33	-0.599417	-1.72414	0.00552486	0.0249662	0.0159663	2750	tags=33%, list=15%, signal=29%	5567/2890/6857/23646/2034/348/1759/1742/482/5730/1363
SHIN_B_CELL_LYMPHOMA_CLUSTER_9	19	-0.682284	-1.72181	0.0095057	0.0369772	0.0236475	2229	tags=47%, list=12%, signal=42%	643/3394/6689/6886/53335/22806/930/5079/973
REACTOME_NEUROTRANSMITTER_RELEASE_CYCLE	51	-0.54579	-1.71881	0.00364299	0.0186328	0.011916	4751	tags=57%, list=25%, signal=43%	6512/10497/6854/64130/22999/2744/6540/140679/8541/60482/6572/10815/27163/57030/7915/320/6507/5864/6857/6571/6506/8825/6853/6812/18/6844/9256/2572/6616
GRADE_COLON_AND_RECTAL_CANCER_DN	100	-0.486058	-1.71779	0.00348432	0.0186029	0.0118969	3516	tags=39%, list=19%, signal=32%	55190/79147/29928/6776/89796/3957/220963/6770/84969/7091/5567/57622/2908/30815/57659/3707/1524/83700/9687/7694/25849/64377/26167/5803/8611/6622/23328/9079/7049/29780/940/339983/1675/8835/192683/56967/9254/2273/5166
KEGG_VASCULAR_SMOOTH_MUSCLE_CONTRACTION	114	-0.479292	-1.71751	0.00176678	0.0149503	0.00956095	3479	tags=39%, list=18%, signal=32%	5739/5566/8398/4882/5582/800/3779/140465/5332/5567/552/2778/5330/5581/4638/4660/2768/23236/4629/553/5322/109/3709/196883/2977/5583/2983/775/108/5588/776/2982/111/185/10266/10268/3708/3778/10203/10242/107/26279/4881/5579/5320
PLASARI_NFIC_TARGETS_BASAL_DN	19	-0.680565	-1.71748	0.0095057	0.0369772	0.0236475	3133	tags=58%, list=17%, signal=48%	6355/2028/4856/4332/5156/253738/2042/4222/4239/9353/2313
MORI_PRE_BI_LYMPHOCYTE_DN	75	-0.508346	-1.71459	0.00364964	0.0186328	0.011916	1445	tags=24%, list=8%, signal=22%	7832/4046/971/401612/9595/9450/1269/25939/914/84824/3587/1901/640/5788/974/933/56605/931
REACTOME_NEUREXINS_AND_NEUROLIGINS	56	-0.529887	-1.71144	0.00536673	0.0244608	0.0156431	3261	tags=48%, list=17%, signal=40%	9455/2905/9229/2911/50944/143425/80059/320/2037/347731/54413/6857/26045/8825/6812/9369/57555/58512/9379/22871/85358/1742/1740/57502/23136/9066/9378
CHASSOT_SKIN_WOUND	11	-0.761886	-1.71082	0.00749064	0.031026	0.0198416	1828	tags=45%, list=10%, signal=41%	1959/1958/1960/4773/2354
KEGG_GRAFT_VERSUS_HOST_DISEASE	37	-0.572771	-1.70981	0.00357143	0.0186029	0.0118969	3025	tags=43%, list=16%, signal=36%	3002/3123/3119/3824/942/3112/3109/5551/3122/3569/3111/3117/3113/3118/3115/940
REACTOME_EICOSANOID_LIGAND_BINDING_RECEPTORS	15	-0.719848	-1.70912	0.00775194	0.0319101	0.020407	4371	tags=80%, list=23%, signal=62%	165140/5739/2840/1241/5734/6915/5729/11251/57105/5737/10800/5733
KEGG_CALCIUM_SIGNALING_PATHWAY	177	-0.448703	-1.70758	0.00167504	0.0149503	0.00956095	3485	tags=40%, list=18%, signal=33%	815/5582/492/2185/22953/2905/155/5533/84812/6915/5335/5332/5567/2911/9127/552/2149/2778/5330/3356/4638/4846/3274/814/6263/5532/23236/5027/8913/3707/553/7220/5350/490/109/3709/6262/154/196883/57105/5137/491/775/108/5737/5336/5156/10800/8911/6547/776/5153/5136/2774/5733/185/952/8912/6869/3708/489/5026/6543/774/6546/107/1910/816/5579/773
BOQUEST_STEM_CELL_CULTURED_VS_FRESH_UP	419	-0.411693	-1.70744	0.00158479	0.0149503	0.00956095	1962	tags=31%, list=10%, signal=28%	64102/7128/70/10257/7079/2326/11010/3776/10457/56603/1831/6348/2308/79895/8614/5295/3075/7057/9060/22998/51285/1634/7832/8639/2022/1842/6095/10178/2983/5789/9936/1306/10404/729/26002/53616/348/79689/862/590/1759/2327/2042/1193/1958/10252/9308/2/1641/687/55714/10580/55273/443/81558/1066/3113/55084/2487/57188/55885/81035/10396/1843/2099/4139/5176/7049/4958/6414/2982/11341/10742/185/6347/23460/25939…
GAURNIER_PSMD4_TARGETS	69	-0.51147	-1.70696	0.00356506	0.0186029	0.0118969	3133	tags=43%, list=17%, signal=36%	6355/3594/4283/3123/8809/3119/718/728/942/6368/50615/6348/3120/3109/1230/3122/719/3569/6362/3111/3117/3113/6352/3115/6347/1234/3603/10563/1236/6363
KEGG_ALLOGRAFT_REJECTION	35	-0.580881	-1.70434	0.00534759	0.0244608	0.0156431	4675	tags=57%, list=25%, signal=43%	3593/3127/3108/3586/356/3002/3123/3119/942/3112/3109/5551/959/3122/3111/3117/3113/3118/3115/940
BIOCARTA_MONOCYTE_PATHWAY	11	-0.758376	-1.70293	0.00749064	0.031026	0.0198416	950	tags=73%, list=5%, signal=69%	3684/3689/6401/5175/3676/3683/6402/6403
REACTOME_NCAM1_INTERACTIONS	42	-0.556532	-1.70123	0.00358423	0.0186029	0.0118969	3690	tags=50%, list=20%, signal=40%	1463/1291/256076/1280/1292/131873/5621/8913/785/6900/1285/1286/775/2675/8911/776/7903/783/8912/2674/4684
REACTOME_REGULATION_OF_GENE_EXPRESSION_IN_BETA_CELLS	21	-0.653093	-1.70009	0.011236	0.0422639	0.0270284	1659	tags=48%, list=9%, signal=43%	2308/6514/4825/10000/3375/2645/4821/222546/5080/4760
REACTOME_SYNTHESIS_SECRETION_AND_DEACYLATION_OF_GHRELIN	19	-0.673471	-1.69957	0.0095057	0.0369772	0.0236475	2638	tags=53%, list=14%, signal=45%	3630/7941/90701/619373/51738/590/2641/3952/3479/5122
WU_SILENCED_BY_METHYLATION_IN_BLADDER_CANCER	51	-0.539662	-1.69951	0.00364299	0.0186328	0.011916	2383	tags=51%, list=13%, signal=45%	1264/3119/3689/4629/1524/3043/3908/1193/219654/4005/3164/7049/6414/2982/11341/5733/10875/5341/8013/5178/3512/3479/1805/5788/5806/1363
REACTOME_ADENYLATE_CYCLASE_INHIBITORY_PATHWAY	14	-0.72074	-1.69941	0.00956023	0.0371583	0.0237634	2268	tags=50%, list=12%, signal=44%	2770/109/196883/108/2774/111/107
CHEBOTAEV_GR_TARGETS_DN	120	-0.468059	-1.6989	0.0017331	0.0149503	0.00956095	2980	tags=42%, list=16%, signal=36%	25817/55316/22836/53344/22986/1757/5734/57722/254228/22881/5569/143425/27295/1600/367/29951/5587/10734/3488/221895/785/10451/22998/9369/90102/767/26167/91624/64506/2675/55026/5217/9023/83716/6594/23768/54674/10396/50804/1272/114928/9829/2824/3662/65982/84870/55089/23345/4897/1363/6387
WANG_RESPONSE_TO_GSK3_INHIBITOR_SB216763_UP	348	-0.414798	-1.69696	0.00163132	0.0149503	0.00956095	4329	tags=37%, list=23%, signal=29%	2696/7096/342908/84938/84162/56606/9586/3108/9909/79738/23287/51611/427/972/9652/57337/79800/9398/79699/10385/58480/11123/3242/2799/497661/4210/83938/114327/26191/3981/4671/23312/2760/4758/84519/9924/9896/10673/112483/57205/283537/1657/5627/2055/49855/146722/376940/220002/5660/26301/80315/727/84898/284759/64393/55819/4685/121274/6483/54557/1102/89849/7294/79713/58484/22990/2548/401494/115727/241/…
PID_IL12_2PATHWAY	63	-0.512383	-1.69692	0.00353357	0.0186029	0.0118969	3774	tags=49%, list=20%, signal=40%	4616/356/6776/10912/3717/3594/8651/3002/3123/3142/8809/30009/8807/5532/3559/3554/6348/3001/3122/926/8320/3560/915/6351/917/920/919/1234/6775/925/916
VANDESLUIS_COMMD1_TARGETS_GROUP_4_DN	17	-0.690013	-1.69678	0.00764818	0.0315665	0.0201873	2674	tags=35%, list=14%, signal=30%	5019/284654/136227/51673/5176/4760
KEGG_LONG_TERM_DEPRESSION	69	-0.508348	-1.69654	0.00356506	0.0186029	0.0118969	2812	tags=35%, list=15%, signal=30%	5332/2911/2778/5330/2890/2770/2768/1392/23236/5322/3709/2977/2983/2982/3708/26279/2891/2781/2892/3479/5579/773/2775/5320
IWANAGA_CARCINOGENESIS_BY_KRAS_PTEN_DN	344	-0.41559	-1.69609	0.00163666	0.0149503	0.00956095	2901	tags=29%, list=15%, signal=25%	5335/10147/64388/57205/126/5997/79776/5019/4212/9931/5376/84898/27295/388336/6943/643680/9723/1264/333929/3119/10321/256435/23031/23266/216/3394/23235/70/59345/85464/619208/9811/3709/2326/6935/79192/29851/3001/863/23194/5311/9590/2619/2022/23111/23140/5789/57463/23040/50937/225/23331/23037/6304/83483/161198/114805/7122/4692/9899/9079/11185/90135/64123/57381/4644/8777/1269/9938/64231/22918/83988/1…
COLIN_PILOCYTIC_ASTROCYTOMA_VS_GLIOBLASTOMA_UP	33	-0.589603	-1.69591	0.00552486	0.0249662	0.0159663	1630	tags=39%, list=9%, signal=36%	347/7018/57555/92737/23037/114805/11341/5270/9770/477/1363/7102/5320
REACTOME_INTRINSIC_PATHWAY_OF_FIBRIN_CLOT_FORMATION	21	-0.650189	-1.69253	0.0131086	0.0472517	0.0302183	2167	tags=43%, list=11%, signal=38%	3818/3053/2157/7450/5547/2811/2/5270/2159
FERRANDO_LYL1_NEIGHBORS	14	-0.717689	-1.69222	0.0133843	0.0476931	0.0305006	1581	tags=57%, list=8%, signal=52%	3087/4046/4005/894/947/7704/596/6402
REACTOME_INITIAL_TRIGGERING_OF_COMPLEMENT	22	-0.636935	-1.69215	0.0109689	0.0416054	0.0266074	3285	tags=68%, list=17%, signal=56%	5648/721/10747/8547/715/718/78989/716/713/712/714/3004/1675/5199/2219
TARTE_PLASMA_CELL_VS_B_LYMPHOCYTE_DN	38	-0.56259	-1.69181	0.00531915	0.0244608	0.0156431	2932	tags=50%, list=16%, signal=42%	10346/9815/643/10982/3394/4066/2841/3087/3109/4261/6304/4050/2643/9308/399/3708/951/640/931
VICENT_METASTASIS_UP	13	-0.730285	-1.69095	0.0116505	0.0431623	0.027603	2078	tags=62%, list=11%, signal=55%	26032/23683/9429/439921/221981/25797/6925/6616
DIAZ_CHRONIC_MEYLOGENOUS_LEUKEMIA_DN	115	-0.471126	-1.69077	0.00176367	0.0149503	0.00956095	2598	tags=33%, list=14%, signal=29%	5621/11025/55803/4638/6507/3394/50856/11010/1393/11006/4818/3109/7832/4332/2322/9450/6304/2162/51338/8530/729230/10186/64231/2260/1436/10875/58494/963/3587/9935/51816/6402/3603/4023/23136/3575/1236/2878
BIOCARTA_BAD_PATHWAY	25	-0.615654	-1.69067	0.00909091	0.0359372	0.0229824	2750	tags=44%, list=15%, signal=38%	5567/5573/5295/3563/3815/5294/5577/596/1439/107/3479
LEE_NEURAL_CREST_STEM_CELL_UP	144	-0.453686	-1.68917	0.00168067	0.0149503	0.00956095	2421	tags=34%, list=13%, signal=30%	1917/3490/3912/79652/9865/81551/10324/3488/4741/3897/11178/4747/6444/51285/1634/2596/28513/5156/26002/2995/862/590/219654/653/8905/1641/10580/54674/9839/11341/6585/6328/4208/3676/10395/1268/29114/477/6750/9705/9118/9378/23114/6616/7373/11189/29106/4804/1113
GUTIERREZ_CHRONIC_LYMPHOCYTIC_LEUKEMIA_UP	12	-0.734318	-1.68904	0.0113852	0.0424651	0.0271571	866	tags=75%, list=5%, signal=72%	5567/9922/10154/1536/5026/3676/911/3512/931
NABA_PROTEOGLYCANS	35	-0.575626	-1.68892	0.00534759	0.0244608	0.0156431	1455	tags=49%, list=8%, signal=45%	633/150356/3339/4060/176/1463/5549/50939/54829/1634/50859/127435/4958/10216/5552/9806/4969
UZONYI_RESPONSE_TO_LEUKOTRIENE_AND_THROMBIN	36	-0.571065	-1.6887	0.00537634	0.0244608	0.0156431	2752	tags=50%, list=15%, signal=43%	5997/3142/2669/3759/1390/84159/22936/3491/1958/10370/6401/3164/1843/1960/8013/9510/81575/5166
REACTOME_ION_HOMEOSTASIS	54	-0.528411	-1.68796	0.00359712	0.0186157	0.0119051	2284	tags=44%, list=12%, signal=39%	5348/845/6263/7220/5350/490/3709/6262/80228/491/1193/6547/486/3767/3708/482/489/6543/478/6546/477/53826/816/10060
KEGG_B_CELL_RECEPTOR_SIGNALING_PATHWAY	75	-0.500107	-1.68681	0.00364964	0.0186328	0.011916	2003	tags=29%, list=11%, signal=26%	5532/25780/10451/975/5295/971/5336/8503/3635/10000/5294/5293/695/4772/23533/4773/930/974/973/933/5579/1380
BIOCARTA_GRANULOCYTES_PATHWAY	15	-0.71013	-1.68605	0.0116279	0.0431471	0.0275933	3034	tags=60%, list=16%, signal=50%	3384/3684/727/1440/3689/5175/3683/6402/6403
MIKKELSEN_ES_HCP_WITH_H3K27ME3	39	-0.558091	-1.68553	0.00355872	0.0186029	0.0118969	5872	tags=64%, list=31%, signal=44%	22865/51296/777/347741/8929/159989/242/7026/57717/91752/81832/758/56146/3234/3645/56129/56121/7025/1630/56145/30820/6886/170302/3752/116
BIOCARTA_CTCF_PATHWAY	24	-0.623041	-1.68241	0.0111732	0.0420956	0.0269208	1819	tags=54%, list=10%, signal=49%	6198/7048/4086/1027/4090/5728/4089/5295/7043/5294/7049/974/973
LOPEZ_MESOTHELIOMA_SURVIVAL_UP	12	-0.730441	-1.68012	0.0113852	0.0424651	0.0271571	2859	tags=42%, list=15%, signal=35%	90634/1389/81558/3570/125
HATADA_METHYLATED_IN_LUNG_CANCER_UP	360	-0.409881	-1.67912	0.00162602	0.0149503	0.00956095	3534	tags=33%, list=19%, signal=27%	9104/56112/126549/51733/57084/1280/2555/755/51226/285676/54463/220001/56925/113220/3645/23498/92999/283537/2917/129684/7253/10125/26108/2834/3142/4947/55321/26301/64168/199777/5330/4846/6943/8291/1264/79827/2044/79652/11314/112609/256435/55351/6263/22795/3707/23098/25956/134548/4741/54806/1435/4066/145581/9576/975/54438/5066/56963/4747/117248/8622/3487/10021/114897/1593/4118/4046/23641/7018/15037…
MIKKELSEN_MEF_HCP_WITH_H3_UNMETHYLATED	222	-0.429511	-1.67709	0.00166945	0.0149503	0.00956095	4593	tags=38%, list=24%, signal=29%	1132/881/11318/64180/341/139065/29930/375341/51444/56606/55879/64599/56135/124535/134829/57110/5739/4842/266743/5777/3902/56139/341880/2670/815/56146/22895/2741/10369/9229/84519/56129/10673/80731/26206/56143/56147/56160/56142/64168/56145/56144/57597/140767/10409/9658/56884/54332/284485/65998/9576/1908/57512/140803/23641/57555/79626/9985/256714/26167/190/393/51209/83483/147138/486/3718/92949/20319…
KEGG_JAK_STAT_SIGNALING_PATHWAY	155	-0.449251	-1.67704	0.0017331	0.0149503	0.00956095	1948	tags=23%, list=10%, signal=21%	3559/30837/50615/1438/5295/3598/6777/9021/1441/8503/7173/3572/3563/3590/3569/10252/10000/5294/3560/5293/3718/894/11009/1271/3953/23533/3570/5618/6775/8835/3587/1439/2690/3977/3952/3575
REACTOME_ABC_TRANSPORTERS_IN_LIPID_HOMEOSTASIS	18	-0.674414	-1.67409	0.0115385	0.0428834	0.0274246	1787	tags=44%, list=9%, signal=40%	8504/20/10349/21/225/23461/23460/10350
SOUCEK_MYC_TARGETS	10	-0.76944	-1.67211	0.00750469	0.0310291	0.0198436	2542	tags=70%, list=13%, signal=61%	11025/6368/6352/6347/1439/10563/6366
REACTOME_INTERLEUKIN_RECEPTOR_SHC_SIGNALING	27	-0.601425	-1.67202	0.00932836	0.0365002	0.0233425	3906	tags=56%, list=21%, signal=44%	2885/5777/9846/3717/3568/3559/1438/5295/8503/3563/3635/3560/5293/3718/1439
BIOCARTA_LYM_PATHWAY	13	-0.72201	-1.67179	0.0135922	0.0480307	0.0307164	725	tags=62%, list=4%, signal=59%	3384/3689/8174/5175/947/3676/3683/6402
DAWSON_METHYLATED_IN_LYMPHOMA_TCL1	56	-0.517482	-1.67137	0.00715564	0.0299753	0.0191697	2498	tags=39%, list=13%, signal=34%	5332/57616/114818/140767/55137/4985/23266/1959/114880/2619/5789/64321/862/285671/27319/57575/2099/79632/3400/26084/84935/4684
BROWNE_HCMV_INFECTION_1HR_UP	52	-0.526542	-1.66988	0.00359066	0.0186029	0.0118969	3062	tags=37%, list=16%, signal=31%	8534/10125/2890/5375/223117/3488/2334/2841/3340/6660/491/3572/3569/3164/375057/5979/11009/1047/3131
REACTOME_PI_3K_CASCADE:FGFR1	21	-0.641388	-1.66962	0.0131086	0.0472517	0.0302183	2538	tags=33%, list=13%, signal=29%	8822/2246/2255/2254/5295/2260/9365
MIKKELSEN_MCV6_ICP_WITH_H3K27ME3	74	-0.492656	-1.6692	0.00358423	0.0186029	0.0118969	2945	tags=30%, list=16%, signal=25%	83546/170591/7881/84432/339398/55553/26278/5368/2255/6329/51294/64321/3762/924/51676/5293/5452/10875/64333/11151/7448/5079
KEGG_FC_EPSILON_RI_SIGNALING_PATHWAY	78	-0.490016	-1.66895	0.00358423	0.0186029	0.0118969	1906	tags=27%, list=10%, signal=24%	5322/2206/10451/5295/6300/5336/8503/5600/3635/10000/5294/3937/5293/2205/2534/695/23533/26279/5602/5579/5320
BIOCARTA_CTL_PATHWAY	13	-0.720745	-1.66886	0.0135922	0.0480307	0.0307164	3697	tags=69%, list=20%, signal=56%	356/3002/3689/5551/915/917/919/3683/916
BIOCARTA_VIP_PATHWAY	26	-0.601494	-1.66856	0.00907441	0.0359372	0.0229824	3084	tags=46%, list=16%, signal=39%	5533/5335/5567/5573/7434/5532/1959/7432/4772/1960/5577/4773
PEPPER_CHRONIC_LYMPHOCYTIC_LEUKEMIA_DN	20	-0.649526	-1.66809	0.0132075	0.0475233	0.0303919	2929	tags=45%, list=16%, signal=38%	6915/5627/10846/8556/4747/64377/9148/1233/90865
YAUCH_HEDGEHOG_SIGNALING_PARACRINE_UP	138	-0.452991	-1.66777	0.00172712	0.0149503	0.00956095	3608	tags=41%, list=19%, signal=33%	78991/7484/3604/167691/220/79575/5648/114905/3002/91947/4155/253559/6326/9697/80108/5727/84871/10077/6507/84636/128853/64102/3488/7220/65975/55698/3290/85004/29121/10418/27065/5179/55504/23704/100132916/90362/590/2042/55273/2487/5979/5733/3953/6367/119/5802/2891/57535/4915/79608/441631/5649/6447/931/286133/6422
REACTOME_G_BETA:GAMMA_SIGNALLING_THROUGH_PI3KGAMMA	24	-0.617591	-1.66769	0.0130354	0.0472065	0.0301893	3138	tags=46%, list=17%, signal=38%	2793/146850/2784/59345/2791/10000/5294/23533/2788/2786/54331
ZHAN_MULTIPLE_MYELOMA_CD1_AND_CD2_UP	88	-0.479732	-1.66737	0.00176367	0.0149503	0.00956095	4665	tags=45%, list=25%, signal=34%	23598/29883/5934/146198/7637/8658/23116/55170/91750/5023/1633/22849/23678/54112/23522/9807/9924/3995/84247/55024/694/6907/9444/2180/241/490/151556/54954/10979/2643/122618/64098/3760/10242/3587/6546/2208/57134/81575/56605
SCHAEFFER_SOX9_TARGETS_IN_PROSTATE_DEVELOPMENT_DN	44	-0.53987	-1.66642	0.00357782	0.0186029	0.0118969	2427	tags=36%, list=13%, signal=32%	54510/114798/10409/2113/25925/6925/9353/1996/7074/10516/9770/1400/10439/3479/6860/6422
BOYLAN_MULTIPLE_MYELOMA_PCA1_UP	111	-0.465187	-1.66394	0.0017452	0.0149503	0.00956095	2362	tags=40%, list=13%, signal=35%	8809/10409/608/10321/25780/718/353514/10451/3240/9576/4818/10261/3067/4332/10418/22797/2357/22936/4050/9823/1511/8434/51338/3560/2533/915/6352/10663/729230/2823/10875/8912/7704/5618/55303/6775/26960/3683/155038/54855/3512/25890/3702/1363
TERAO_AOX4_TARGETS_SKIN_DN	21	-0.639123	-1.66372	0.0131086	0.0472517	0.0302183	4837	tags=67%, list=26%, signal=50%	23383/115265/136895/51149/389432/1657/90293/2104/64407/118491/225/23305/3479/7345
ONDER_CDH1_TARGETS_3_UP	18	-0.669473	-1.66182	0.0115385	0.0428834	0.0274246	3986	tags=61%, list=21%, signal=48%	9500/10916/6919/6279/1831/8614/687/3953/7704/3778/1545
REACTOME_CGMP_EFFECTS	16	-0.688729	-1.66077	0.00769231	0.0316926	0.0202679	3119	tags=56%, list=17%, signal=47%	3779/10846/8654/5153/5136/5138/3708/3778/10242
NOUZOVA_METHYLATED_IN_APL	60	-0.507457	-1.66022	0.00357143	0.0186029	0.0118969	3377	tags=38%, list=18%, signal=32%	56100/201163/84630/399697/157869/2044/26032/345895/159296/79192/222008/23284/147948/54504/4325/25822/154661/23705/23428/130497/26040/5199/6752
REACTOME_FCERI_MEDIATED_CAPLUS2_MOBILIZATION	31	-0.581689	-1.65909	0.0107527	0.0410144	0.0262294	4040	tags=61%, list=21%, signal=48%	801/2885/7409/2207/5335/7294/5532/3709/2206/10451/5336/3937/2205/9402/695/4772/3708/4773/3702
THEODOROU_MAMMARY_TUMORIGENESIS	30	-0.58263	-1.6582	0.010772	0.0410144	0.0262294	2786	tags=57%, list=15%, signal=48%	7471/5159/23199/57628/340419/1326/5627/5740/23245/3912/2255/490/28999/10178/57713/1960/84870
HAHTOLA_MYCOSIS_FUNGOIDES_DN	15	-0.69833	-1.65803	0.0116279	0.0431471	0.0275933	2275	tags=47%, list=12%, signal=41%	3119/5583/1066/7704/951/3512/10320
ASGHARZADEH_NEUROBLASTOMA_POOR_SURVIVAL_DN	40	-0.546123	-1.65608	0.0035524	0.0186029	0.0118969	4328	tags=50%, list=23%, signal=39%	22903/83591/92806/6605/59269/54329/2676/1107/2770/4914/8913/84553/9001/6328/29767/1268/107/57731/221935/55800
SCHAEFFER_PROSTATE_DEVELOPMENT_12HR_DN	48	-0.527174	-1.65342	0.00728597	0.0302858	0.0193683	2595	tags=42%, list=14%, signal=36%	5100/1107/6483/10409/1995/284654/3090/3487/2596/5630/51617/273/1996/29114/1400/10439/4915/53826/6860/6387
ONO_AML1_TARGETS_UP	25	-0.59935	-1.6459	0.0127273	0.0461982	0.0295445	3948	tags=72%, list=21%, signal=57%	57823/4616/356/51744/4204/3002/80380/5997/1655/84868/4818/3001/5133/8320/9934/10663/8788/952
REACTOME_FGFR1_LIGAND_BINDING_AND_ACTIVATION	16	-0.682488	-1.64572	0.00769231	0.0316926	0.0202679	2538	tags=38%, list=13%, signal=32%	8822/2246/2255/2254/2260/9365
CHIARADONNA_NEOPLASTIC_TRANSFORMATION_KRAS_CDC25_DN	51	-0.521726	-1.64303	0.00364299	0.0186328	0.011916	1879	tags=33%, list=10%, signal=30%	718/3371/3554/2277/285313/27065/3590/8745/8839/6288/151887/1036/4256/1545/5806/5166/6387
HERNANDEZ_MITOTIC_ARREST_BY_DOCETAXEL_1_UP	32	-0.573721	-1.64282	0.00909091	0.0359372	0.0229824	1092	tags=47%, list=6%, signal=44%	7078/6446/128077/7424/28984/590/8908/1843/2719/6869/183/1910/25890/9452/6366
GERHOLD_ADIPOGENESIS_UP	48	-0.523441	-1.64172	0.00728597	0.0302858	0.0193683	1340	tags=27%, list=7%, signal=25%	3945/7436/348/3991/1675/3679/8404/183/2690/3479/948/2167/9370
ASTON_MAJOR_DEPRESSIVE_DISORDER_UP	47	-0.525031	-1.63691	0.00728597	0.0302858	0.0193683	4669	tags=51%, list=25%, signal=39%	3730/7248/3073/2947/5108/887/800/5745/324/9229/57711/22881/3490/23033/9687/23090/53616/5179/5980/5325/11122/53335/10659/7276
BIOCARTA_TCR_PATHWAY	44	-0.530295	-1.63687	0.00536673	0.0244608	0.0156431	2003	tags=43%, list=11%, signal=39%	801/2885/7409/6416/5533/5335/5532/5295/5294/915/917/2534/919/5778/4772/4773/7535/916/5579
REACTOME_PLATELET_CALCIUM_HOMEOSTASIS	28	-0.584916	-1.63593	0.0108696	0.0413522	0.0264454	4159	tags=64%, list=22%, signal=50%	5023/801/57113/492/22953/9127/7225/5027/490/3709/80228/491/6547/3708/489/5026/6543/6546
KEGG_PRION_DISEASES	35	-0.557538	-1.63585	0.00713012	0.0299311	0.0191415	2750	tags=40%, list=15%, signal=34%	5567/5621/727/4685/713/712/714/729/3569/1958/6352/2534/4684/730
CHARAFE_BREAST_CANCER_BASAL_VS_MESENCHYMAL_DN	51	-0.518864	-1.63401	0.00364299	0.0186328	0.011916	3777	tags=47%, list=20%, signal=38%	26289/7187/9891/151963/1292/4267/154043/221662/221687/3797/7402/6000/6935/10019/9945/4325/23331/2791/10687/219654/9915/4131/333/7857
PIEPOLI_LGI1_TARGETS_UP	16	-0.677457	-1.63359	0.00961538	0.0372796	0.0238409	4265	tags=75%, list=23%, signal=58%	4094/10018/23530/2258/7078/2044/6262/1496/8530/9077/10875/3131
HADDAD_B_LYMPHOCYTE_PROGENITOR	264	-0.410998	-1.63178	0.00166667	0.0149503	0.00956095	2840	tags=27%, list=15%, signal=23%	4852/7091/65986/10125/55024/4033/11027/694/55805/4638/6843/8303/25957/7915/22795/3759/744/10734/753/23635/9429/2308/55790/472/7832/7694/8850/5311/9590/84159/971/4261/23090/10288/5101/80183/7805/9934/10370/51237/6925/5293/57556/23240/29802/939/60468/2824/161176/7852/5450/3662/6328/4208/3708/5026/10391/8835/969/930/2788/26999/640/5079/78986/974/973/933/9214/3575/8115/931
BOYLAN_MULTIPLE_MYELOMA_C_D_DN	265	-0.40989	-1.62975	0.00165289	0.0149503	0.00956095	2362	tags=35%, list=13%, signal=31%	8809/10409/608/30009/3824/203259/10321/84636/10100/55151/8807/168544/535/84626/25780/6003/718/26253/353514/2206/953/353189/10451/3240/29967/9576/22901/4818/64499/29851/10261/3001/3067/3290/64407/4332/6095/10418/3945/22797/5588/8320/2357/79689/22936/28984/924/2162/4050/54900/9823/1511/9934/8434/3815/10666/51338/3560/2533/1880/4068/915/89853/6352/917/4542/10663/6414/729230/79603/2823/10875/8912/770…
MCGARVEY_SILENCED_BY_METHYLATION_IN_COLON_CANCER	42	-0.532648	-1.62822	0.00537634	0.0244608	0.0156431	2661	tags=36%, list=14%, signal=31%	5443/170689/59345/170692/430/83700/2199/64321/57338/2202/9148/6424/10752/7345/6422
CHUNG_BLISTER_CYTOTOXICITY_DN	43	-0.53192	-1.62788	0.00723327	0.0302012	0.0193142	2441	tags=51%, list=13%, signal=45%	5934/55534/2887/5023/400073/10602/23389/8303/401494/84106/23108/134957/51199/64407/8850/4332/5336/51411/5199/9750/6402/5579
WORSCHECH_TUMOR_REJECTION_UP	60	-0.497375	-1.62724	0.00357143	0.0186029	0.0118969	3750	tags=43%, list=20%, signal=35%	2826/10333/356/597/7293/6355/3002/6356/4481/3824/7099/7133/353514/6368/57593/4332/6351/6352/117289/6367/3662/10462/3512/3702/3575/2532
REACTOME_GLUTAMATE_BINDING_ACTIVATION_OF_AMPA_RECEPTORS_AND_SYNAPTIC_PLASTICITY	31	-0.569184	-1.62342	0.0125448	0.0457851	0.0292803	482	tags=35%, list=3%, signal=35%	815/5582/10369/2890/2893/1742/2891/2892/816/5579/7102
DUNNE_TARGETS_OF_AML1_MTG8_FUSION_UP	51	-0.515214	-1.62252	0.00728597	0.0302858	0.0193683	2532	tags=55%, list=13%, signal=48%	4925/6279/5734/694/89849/3490/241/29125/4818/8825/54622/64092/7940/9051/1441/9936/7805/23048/1511/8530/4542/3385/7852/3570/5552/6503/3936/10235
HUNSBERGER_EXERCISE_REGULATED_GENES	30	-0.569928	-1.62205	0.010772	0.0410144	0.0262294	2188	tags=50%, list=12%, signal=44%	9500/2885/5105/4852/1440/1959/4885/6853/1958/22859/23705/7425/3603/4915/7857
ZHAN_MULTIPLE_MYELOMA_MS_UP	47	-0.520069	-1.62144	0.00728597	0.0302858	0.0193683	2534	tags=34%, list=13%, signal=30%	27018/90293/92126/25925/83700/29967/25924/154661/4139/10742/5270/4675/1047/1837/140597/51310
SERVITJA_ISLET_HNF1A_TARGETS_UP	159	-0.432925	-1.62042	0.00173913	0.0149503	0.00956095	3037	tags=45%, list=16%, signal=38%	5118/7025/2200/3995/2917/8840/5332/7070/79776/23129/4212/5376/94120/397/26052/643680/140767/814/2044/2037/3689/64780/56884/7431/1435/1959/25925/6368/51435/7432/716/4747/713/2596/9590/714/51560/117/4062/27303/5764/348/7043/7805/1759/6622/55799/9899/2982/1149/3400/6347/2202/9515/51617/9256/2259/1960/5270/1268/3679/9201/8404/10752/1545/116/78986/1805/10563/7345/6387
IVANOVA_HEMATOPOIESIS_STEM_CELL	180	-0.425934	-1.61999	0.00167785	0.0149503	0.00956095	3067	tags=30%, list=16%, signal=25%	85463/79870/220382/57722/6915/79960/5567/54839/768206/64753/5581/2669/3680/80059/5837/25830/222553/223117/23077/80760/5311/4916/2022/9369/57683/6595/7436/9962/90362/1958/56265/3164/23328/54538/6925/6844/2099/1123/129049/29965/79603/114088/54873/3763/9353/5142/23208/4773/9900/3798/51705/51655/9378/6363
VECCHI_GASTRIC_CANCER_ADVANCED_VS_EARLY_UP	169	-0.428002	-1.61959	0.00169492	0.0149503	0.00956095	3926	tags=44%, list=21%, signal=35%	55704/5549/4053/64359/29887/1004/25817/1601/9891/5396/11167/7097/9358/8038/800/160428/7078/23462/2200/8840/84898/84868/3119/4481/84547/9420/9444/6507/7941/22795/133746/59345/29940/727936/7220/54332/10457/8614/7057/51309/4921/2619/3908/719/23090/1306/9945/26002/83690/3569/57713/50810/5139/158880/2327/10082/4628/10000/2982/9332/11009/134111/2202/28986/23533/9353/7074/9935/6424/4256/7060/4023/1545/1…
CREIGHTON_ENDOCRINE_THERAPY_RESISTANCE_2	432	-0.389721	-1.61841	0.0016	0.0149503	0.00956095	5371	tags=48%, list=28%, signal=35%	79583/54585/130162/84288/1767/200373/84131/8701/11158/55231/11092/4291/80705/80313/1318/10745/5813/83853/3753/55352/10693/4867/124637/158787/149465/146845/161394/83894/25876/95681/151651/26130/138255/129881/151790/83544/56890/374868/55776/55130/1690/254428/200081/83657/257236/219621/23116/11116/90288/51533/4117/80258/80217/400566/10943/7597/254956/84316/23567/79864/65055/220136/6932/54887/54681/8…
PID_CXCR3_PATHWAY	43	-0.528295	-1.61678	0.00723327	0.0302012	0.0193142	2838	tags=33%, list=15%, signal=28%	4283/6356/2770/3689/5295/8503/5600/1759/5293/3683/2781/10563/2775/54331
LEIN_LOCALIZED_TO_DISTAL_AND_PROXIMAL_DENDRITES	17	-0.657265	-1.61625	0.0114723	0.0427395	0.0273326	572	tags=65%, list=3%, signal=63%	84687/815/51440/134548/1902/5662/1742/3708/107/3798/1363
REACTOME_INTERLEUKIN_2_FAMILY_SIGNALING	44	-0.523155	-1.61483	0.00715564	0.0299753	0.0191697	4104	tags=50%, list=22%, signal=39%	6655/2885/5777/9846/6776/2185/3717/3568/84868/3559/50615/1438/5295/6777/8503/3563/3635/3560/5293/3718/6775/1439
BIOCARTA_IL7_PATHWAY	16	-0.666957	-1.60827	0.0115385	0.0428834	0.0274246	1633	tags=56%, list=9%, signal=51%	6776/2185/5295/6777/5294/3718/2534/596/3575
MIKKELSEN_ES_ICP_WITH_H3K27ME3	40	-0.529762	-1.60647	0.0071048	0.0299311	0.0191415	4320	tags=52%, list=23%, signal=41%	7124/1582/797/149465/56130/7732/6440/53822/8534/83546/5158/1264/3208/347731/4629/55026/51237/9839/64098/94030/3952
YAO_HOXA10_TARGETS_VIA_PROGESTERONE_UP	79	-0.468952	-1.60335	0.0053286	0.0244608	0.0156431	2451	tags=35%, list=13%, signal=31%	7056/7881/2669/3119/7069/2006/5295/5090/3908/358/1441/348/687/23371/7122/3164/11185/3953/1675/54361/5178/596/477/5168/8436/7148/4684/9370
REACTOME_TRAFFICKING_OF_GLUR2_CONTAINING_AMPA_RECEPTORS	17	-0.651439	-1.60192	0.0133843	0.0476931	0.0305006	2303	tags=35%, list=12%, signal=31%	2890/2893/2891/2892/5579/7102
COLDREN_GEFITINIB_RESISTANCE_UP	83	-0.46431	-1.60051	0.00528169	0.0244108	0.0156111	3911	tags=46%, list=21%, signal=36%	85450/55244/79047/150465/403/4194/55352/6666/55454/3399/51611/4673/140606/5793/10491/80311/1000/23433/119032/89927/10962/128077/6907/83856/84085/216/26278/359845/6935/83700/22873/25797/29780/91775/7275/10439/4131/7345
POMEROY_MEDULLOBLASTOMA_DESMOPLASIC_VS_CLASSIC_DN	60	-0.488926	-1.5996	0.00535714	0.0244608	0.0156431	3216	tags=37%, list=17%, signal=31%	220/7029/4811/2735/9896/5727/3394/3488/716/3075/347/4916/5090/6925/7852/1996/1268/596/4256/3642/7345/6447
ABE_VEGFA_TARGETS_30MIN	28	-0.57167	-1.59889	0.0126812	0.0461025	0.0294833	2170	tags=54%, list=11%, signal=47%	1827/910/9805/1959/1620/3067/348/3491/1958/3164/5539/27253/1960/1996/3003
CHEN_LVAD_SUPPORT_OF_FAILING_HEART_DN	42	-0.522912	-1.59845	0.00896057	0.0358116	0.0229021	3272	tags=48%, list=17%, signal=39%	2153/6279/8829/2697/5734/5740/8707/3043/729/929/3764/6347/783/58494/55303/5142/478/187/6387/6366
MIKKELSEN_ES_HCP_WITH_H3_UNMETHYLATED	63	-0.482393	-1.5976	0.00530035	0.0244245	0.0156199	4194	tags=32%, list=22%, signal=25%	56606/64599/80778/4842/3604/815/22895/10369/56160/57597/25780/284485/84631/26167/486/54873/6750/6752/10060/6855
BIOCARTA_DC_PATHWAY	17	-0.649516	-1.5972	0.0133843	0.0476931	0.0305006	2370	tags=35%, list=13%, signal=31%	945/3687/51284/924/914/921
CAIRO_HEPATOBLASTOMA_CLASSES_DN	211	-0.409444	-1.59502	0.00330579	0.0181974	0.0116375	3261	tags=39%, list=17%, signal=33%	9455/51226/9881/9681/1827/7363/643641/20/10129/22914/10346/126/9363/2028/1540/1519/4638/375449/367/55679/9734/124/9020/8869/196740/9404/715/130/1524/3554/6935/1831/2277/975/716/25802/54438/8605/8516/5787/57118/80760/3290/25924/1634/135138/2022/3908/5583/10418/100996492/3572/8722/256949/1958/79633/219654/23371/79812/443/3560/55340/25992/9079/29909/3820/23460/5923/79987/1776/5138/10268/316/126393/2…
REACTOME_INTERLEUKIN_3_INTERLEUKIN_5_AND_GM_CSF_SIGNALING	48	-0.508322	-1.5943	0.00910747	0.0359372	0.0229824	3906	tags=46%, list=21%, signal=36%	2885/5777/5566/9846/7409/6776/3717/3568/2889/3559/1438/5295/6777/8503/3563/3055/3635/3560/5293/3718/2534/1439
REACTOME_BINDING_AND_UPTAKE_OF_LIGANDS_BY_SCAVENGER_RECEPTORS	42	-0.521403	-1.59384	0.00896057	0.0358116	0.0229021	3285	tags=40%, list=17%, signal=34%	5648/284297/3040/4481/55576/78989/3240/3043/8578/348/81035/9332/6288/23166/3512/948/286133
REACTOME_COOPERATION_OF_PDCL_PHLP1_AND_TRIC_CCT_IN_G_PROTEIN_BETA_FOLDING	40	-0.525432	-1.59334	0.00888099	0.0357076	0.0228356	2300	tags=30%, list=12%, signal=26%	2784/2770/59345/6000/8786/2791/8787/2788/2781/2786/2775/54331
REACTOME_REGULATION_OF_BETA_CELL_DEVELOPMENT	42	-0.520423	-1.59085	0.00896057	0.0358116	0.0229021	1944	tags=33%, list=10%, signal=30%	2255/2308/8850/6514/4825/10000/10046/3375/2645/4821/222546/5080/3642/4760
DACOSTA_ERCC3_ALLELE_XPCS_VS_TTD_DN	34	-0.547848	-1.59076	0.00910747	0.0359372	0.0229824	3712	tags=59%, list=20%, signal=47%	1185/4919/3162/9324/55816/3037/1264/9404/23635/1183/7436/5764/5157/23066/8613/7852/10266/10395/23336/5168
THUM_SYSTOLIC_HEART_FAILURE_UP	405	-0.384168	-1.59009	0.00158983	0.0149503	0.00956095	3912	tags=35%, list=21%, signal=28%	54941/4673/81688/972/4053/140606/80832/4616/4774/153222/10402/10602/10491/2115/11080/5396/442319/51616/9358/58155/59272/2213/65997/90624/56911/56925/6355/3717/54829/2207/170463/26074/9581/5631/23643/3123/154043/23229/5962/4033/8292/23554/5621/397/84898/51313/64168/90139/1266/2246/3119/4481/3689/7305/7099/241/10324/6487/3394/57088/7402/6480/83478/1524/51435/6935/953/83700/11326/716/713/712/7057/51…
PID_LPA4_PATHWAY	15	-0.669648	-1.58993	0.0135659	0.0480307	0.0307164	4092	tags=60%, list=22%, signal=47%	9252/5566/5581/109/196883/108/2774/111/107
DAVICIONI_MOLECULAR_ARMS_VS_ERMS_UP	333	-0.391666	-1.58978	0.00165017	0.0149503	0.00956095	3734	tags=34%, list=20%, signal=28%	80150/79068/5037/29098/27185/10602/9656/4851/55190/55852/10670/8924/56995/23389/10912/58155/5116/152/8648/1346/259230/57209/9110/29116/81689/10129/84726/1184/79570/283537/2294/158427/4591/1955/89927/64208/10014/23177/3298/8732/5048/26268/23245/54898/238/6615/64780/22844/23189/7434/26575/6263/827/85458/23108/23122/5860/8760/25903/54886/2308/8614/1908/7594/79605/1620/58528/9863/4916/5789/64377/4399…
URS_ADIPOCYTE_DIFFERENTIATION_UP	66	-0.478744	-1.58792	0.00542495	0.02461	0.0157385	2361	tags=35%, list=13%, signal=31%	123/5348/6256/2180/6777/1410/1842/491/5803/1511/51761/3929/5341/3757/187/5802/183/7448/4023/2819/1805/2167/9370
SCHRAETS_MLL_TARGETS_UP	30	-0.557825	-1.5876	0.010772	0.0410144	0.0262294	1873	tags=40%, list=10%, signal=36%	3371/1634/4332/10763/4692/23705/947/5270/5178/8436/2273/7102
WATANABE_ULCERATIVE_COLITIS_WITH_CANCER_DN	15	-0.668285	-1.5867	0.0135659	0.0480307	0.0307164	2283	tags=60%, list=12%, signal=53%	115362/85464/246175/64092/10800/3937/10663/6503/57580
TAKEDA_TARGETS_OF_NUP98_HOXA9_FUSION_8D_DN	190	-0.413938	-1.58446	0.00167224	0.0149503	0.00956095	3304	tags=42%, list=18%, signal=35%	2213/2153/3101/57458/80896/4199/8829/222487/6446/9120/3684/57205/3568/5621/84898/51313/55022/84658/7941/10100/27314/56833/131450/6999/727936/2113/53346/728/221895/50856/85329/2206/10457/6368/953/147463/713/712/84329/152007/57118/3290/2034/9732/1602/714/64581/2701/50852/929/3563/2357/2359/6489/3117/913/8530/2533/2857/55084/3937/27334/81035/11309/1536/9332/284129/81849/1378/3778/596/6285/2219/8406/…
HOFFMANN_IMMATURE_TO_MATURE_B_LYMPHOCYTE_UP	38	-0.526266	-1.58257	0.0106383	0.040738	0.0260526	1927	tags=39%, list=10%, signal=36%	359845/1435/8851/5090/51560/4261/348/51338/64231/399/55303/6775/596/6402/1380
AKL_HTLV1_INFECTION_DN	67	-0.474443	-1.58137	0.00533808	0.0244608	0.0156431	4211	tags=51%, list=22%, signal=40%	23097/9659/29969/10656/10142/23376/7273/2015/3002/1288/10129/51465/4212/5569/25957/3490/7259/23266/57515/942/3001/8477/54504/26228/5980/917/51761/29909/10225/2534/5175/4208/158471/5168
BAELDE_DIABETIC_NEPHROPATHY_UP	89	-0.454727	-1.57759	0.00530035	0.0244245	0.0156199	1969	tags=37%, list=10%, signal=33%	2822/3488/5797/1393/6348/3043/94/5787/4855/2022/358/2009/221395/9754/9679/7089/219654/9719/486/57556/8613/7075/5175/6578/947/5138/10266/7123/7010/22899/26112/9452/1191
SA_MMP_CYTOKINE_CONNECTION	15	-0.664357	-1.57737	0.0135659	0.0480307	0.0307164	2183	tags=47%, list=12%, signal=41%	943/7133/1435/944/6693/3570/6402
MIKKELSEN_MEF_ICP_WITH_H3K4ME3_AND_H3K27ME3	38	-0.523792	-1.57513	0.0106383	0.040738	0.0260526	2325	tags=42%, list=12%, signal=37%	4886/57144/347731/55553/55691/3759/26278/6857/2255/5274/8506/55273/11151/8715/50632/5122
REACTOME_G_PROTEIN_BETA:GAMMA_SIGNALLING	31	-0.552238	-1.57509	0.0125448	0.0457851	0.0292803	3138	tags=48%, list=17%, signal=40%	2793/146850/5330/2784/23236/59345/2791/10000/5294/695/23533/9459/2788/2786/54331
ZHENG_FOXP3_TARGETS_IN_THYMUS_UP	192	-0.40972	-1.57221	0.00166113	0.0149503	0.00956095	2405	tags=24%, list=13%, signal=22%	2908/57157/22884/80055/5996/5991/7128/753/2113/23387/490/2841/246175/23258/3423/5295/84159/50852/113263/26034/10370/1880/149628/27334/6504/8832/9760/114836/25939/9840/7852/940/3662/55843/27244/6503/5142/6775/8835/969/4121/2313/285513/55619/10659/3575/1363
CHANGOLKAR_H2AFY_TARGETS_DN	40	-0.517794	-1.57018	0.0124334	0.0455566	0.0291342	3357	tags=30%, list=18%, signal=25%	54737/5648/4638/367/219899/5028/5629/22936/1240/2690/5730/5649
MCCLUNG_COCAINE_REWARD_5D	71	-0.465936	-1.5677	0.00528169	0.0244108	0.0156111	2394	tags=37%, list=13%, signal=32%	6397/2890/22924/2893/2006/84867/6812/6595/5179/752/55799/6844/5064/920/1490/81849/1742/482/51412/10391/5142/4753/9806/6855/10659/7102
ODONNELL_TARGETS_OF_MYC_AND_TFRC_UP	78	-0.458491	-1.56158	0.00537634	0.0244608	0.0156431	2967	tags=46%, list=16%, signal=39%	3684/10346/2917/64393/1102/388403/3119/80008/7351/5996/11010/1524/1831/3112/3423/5742/84622/10608/971/64005/6304/94241/18/4005/3117/149628/3937/939/5142/969/951/54855/4897/9214/219972/286133
PID_CXCR4_PATHWAY	101	-0.441307	-1.56144	0.00695652	0.0295478	0.0188963	2375	tags=32%, list=13%, signal=28%	3680/2770/5996/23236/2308/5295/8516/6777/3122/409/8503/3055/1759/5294/2268/915/917/5293/920/2534/919/7852/23533/3676/3679/916/2781/640/5788/2775/54331/6387
PID_IL2_1PATHWAY	55	-0.486025	-1.5604	0.00897666	0.0358146	0.022904	3593	tags=35%, list=19%, signal=28%	9846/6776/2185/8651/5581/1154/3559/5295/6777/9021/5600/9046/3560/3718/2534/8835/22806/596/5579
ROSS_LEUKEMIA_WITH_MLL_FUSIONS	78	-0.458119	-1.56031	0.00537634	0.0244608	0.0156431	3708	tags=40%, list=20%, signal=32%	24141/1601/4154/22836/3355/26054/22914/5098/79888/3490/11024/64780/9638/23122/23646/6368/4818/1602/5090/7436/1066/6352/9839/59342/894/2824/65982/3679/55228/3059/5788
REACTOME_AQUAPORIN_MEDIATED_TRANSPORT	51	-0.495363	-1.56	0.00910747	0.0359372	0.0229824	3138	tags=41%, list=17%, signal=34%	2793/22841/5567/2778/360/5573/2784/59345/109/361/196883/358/108/2791/364/111/5577/2788/107/2786/54331
SANSOM_APC_TARGETS_DN	343	-0.382423	-1.55968	0.00164204	0.0149503	0.00956095	2616	tags=31%, list=14%, signal=28%	7166/397/3682/1600/6943/6397/28512/10409/608/22924/2687/3687/3689/7305/11155/8900/168544/535/1215/3090/6480/384/4066/3112/653361/1908/29851/8844/58528/9060/89846/3001/155066/51177/3109/4921/2053/4046/714/54345/51738/971/6514/10461/8506/140885/9936/1644/23040/7092/9435/2123/7805/6689/924/752/8611/3635/7462/2641/2324/8530/122618/9099/3560/915/54491/6352/5293/23428/7903/3767/3820/5450/6532/940/3662/…
DAVICIONI_TARGETS_OF_PAX_FOXO1_FUSIONS_DN	66	-0.470225	-1.55966	0.00542495	0.02461	0.0157385	2892	tags=41%, list=15%, signal=35%	64388/2620/5332/5997/5569/9865/10324/70/4741/2254/1908/56944/23335/26002/80183/54674/6925/6351/6347/115207/9459/55843/3708/55086/3757/8404/9806
BIOCARTA_GPCR_PATHWAY	30	-0.547487	-1.55818	0.0125673	0.0458315	0.02931	3084	tags=33%, list=16%, signal=28%	5533/5335/5567/5573/5532/4772/5577/4773/107/5579
BIOCARTA_FCER1_PATHWAY	39	-0.514876	-1.55502	0.0142349	0.0499988	0.0319751	4040	tags=41%, list=21%, signal=32%	801/2885/7409/6416/5533/2207/5335/5532/2206/5295/5294/2205/695/4772/4773/5579
INGRAM_SHH_TARGETS_UP	123	-0.427419	-1.55434	0.00350877	0.0186029	0.0118969	2946	tags=38%, list=16%, signal=32%	9848/112574/83938/4811/58511/2735/2200/51465/5443/5376/7056/2908/5727/3490/117581/152831/151556/25903/2326/11259/21/1831/11228/347/3487/1634/56172/9590/6095/64094/5179/10252/653/687/2324/3164/11185/1843/4958/6414/1490/10266/7123/7010/4256/1545/221476
PANGAS_TUMOR_SUPPRESSION_BY_SMAD1_AND_SMAD5_UP	127	-0.42351	-1.55139	0.00510204	0.0236743	0.0151401	3421	tags=43%, list=18%, signal=36%	9891/11167/10278/89796/342527/2015/57458/1757/4811/94032/2735/90161/56977/5569/2245/4147/57125/79652/55068/23180/727936/2113/115557/2277/56963/7456/712/340527/23263/4332/1410/57537/64581/168667/283897/23051/775/23090/27303/9532/7805/50810/64101/8447/6925/9535/89857/4772/8490/9068/10516/158471/3936/100507421/10659
RICKMAN_HEAD_AND_NECK_CANCER_B	50	-0.493771	-1.55113	0.0110294	0.0416517	0.026637	1489	tags=26%, list=8%, signal=24%	6857/81578/9369/590/3117/4958/51299/2719/26084/55228/6424/55859/4969
BILBAN_B_CLL_LPL_UP	60	-0.474102	-1.5511	0.00892857	0.0357756	0.0228791	1885	tags=32%, list=10%, signal=29%	6480/2841/51284/9590/9962/1756/9823/10687/3117/8910/27240/60468/23460/3662/2208/23089/4023/9844/1236
PID_TXA2PATHWAY	56	-0.480189	-1.55092	0.0107335	0.0410014	0.0262211	3113	tags=39%, list=16%, signal=33%	146850/6915/5729/5330/5581/4846/2768/5583/409/5588/5600/3055/1759/6401/5294/2268/2534/157/23533/640/5579/54331
TONKS_TARGETS_OF_RUNX1_RUNX1T1_FUSION_HSC_DN	187	-0.405551	-1.55064	0.00167504	0.0149503	0.00956095	2203	tags=32%, list=12%, signal=29%	2212/80008/7305/2180/8900/241/3394/753/3488/10257/1435/353189/29125/4818/3043/4744/9415/3487/3067/863/4689/7940/6688/30845/864/7805/9046/8611/4050/1511/7462/8530/1880/10154/3937/2205/1536/51411/6347/23166/7852/399/3570/7704/1960/1043/5026/6503/3757/3587/3683/9770/1439/54440/6285/962/1545/3575/1236/948
MEISSNER_NPC_HCP_WITH_H3K4ME2_AND_H3K27ME3	340	-0.380718	-1.55004	0.00163666	0.0149503	0.00956095	2612	tags=32%, list=14%, signal=28%	9745/84966/168002/2778/5172/388336/57699/238/163933/3736/30009/1995/6899/146713/137970/9427/4985/83482/284654/25830/22983/80725/138046/23108/11248/133584/6262/2850/54212/27112/430/654/353189/610/6900/55118/4744/79605/54796/23349/25924/85004/4118/5799/54345/491/2322/4062/64506/10893/64094/5179/26468/3738/6492/84063/2899/3785/23467/4825/57338/8911/255928/114805/157695/5630/375057/81035/140689/12743…
XU_GH1_EXOGENOUS_TARGETS_UP	51	-0.491848	-1.54894	0.010929	0.0415443	0.0265683	4136	tags=39%, list=22%, signal=31%	1395/6655/64800/4842/2057/79570/2834/9294/845/256435/94097/80863/28996/27445/5452/117289/64231/9068/8404/6861
KEGG_COMPLEMENT_AND_COAGULATION_CASCADES	69	-0.464015	-1.54858	0.00713012	0.0299311	0.0191415	3285	tags=46%, list=17%, signal=38%	5648/2153/2244/721/10747/5627/2149/727/7056/3818/715/718/3053/728/2155/2157/716/3075/713/712/7450/714/719/729/2162/2/1378/1675/5345/2159/1380/730
GRUETZMANN_PANCREATIC_CANCER_DN	193	-0.403675	-1.54675	0.00167504	0.0149503	0.00956095	3400	tags=27%, list=18%, signal=23%	162/10260/3957/5745/4925/8648/6446/34/4781/5962/6509/727/694/7881/4886/23189/216/2593/4089/21/1359/6609/3087/2053/5799/8850/4046/5090/1410/729/3572/2995/1501/1756/866/486/4542/894/2719/23542/781/5577/1036/8406/4915/4897/5080/1804/1191/333/6387/5798/2878
HOEBEKE_LYMPHOID_STEM_CELL_UP	91	-0.443863	-1.54554	0.00884956	0.0356118	0.0227744	2708	tags=33%, list=14%, signal=28%	64759/23389/30817/79870/3142/23129/1107/9922/10409/55351/3394/7128/29125/10418/64174/19/864/6304/9934/27128/6925/695/9938/6328/3676/26040/80342/51466/22861/5579
BASSO_CD40_SIGNALING_DN	68	-0.462684	-1.54527	0.00707965	0.0298805	0.019109	2568	tags=38%, list=14%, signal=33%	360/2852/23299/7915/9734/10750/5368/6480/653361/199/4689/7832/80228/862/4050/55885/939/952/25840/5450/3782/1268/5577/1439/3512/10235
HESS_TARGETS_OF_HOXA9_AND_MEIS1_DN	80	-0.450335	-1.5444	0.00706714	0.0298547	0.0190925	2740	tags=41%, list=15%, signal=35%	146722/5660/4856/100506736/2867/4481/728/1959/384/353514/7832/4046/10461/7018/64581/140885/719/2357/3055/1958/9934/2268/1843/1536/1234/64231/25939/1436/5341/1439/4023/4360/219972
KEGG_ADIPOCYTOKINE_SIGNALING_PATHWAY	67	-0.462602	-1.5419	0.00533808	0.0244608	0.0156431	2120	tags=27%, list=11%, signal=24%	6256/2180/7133/6517/9021/5588/84254/10000/6258/126129/3953/23305/32/57818/3952/5602/948/9370
RODWELL_AGING_KIDNEY_UP	459	-0.36819	-1.53836	0.0015625	0.0149503	0.00956095	2283	tags=29%, list=12%, signal=26%	115362/3119/4481/2687/387758/3689/6507/2550/421/7305/441168/91607/5996/56833/23180/7424/715/7431/3394/59345/753/359845/10870/144165/3371/6571/221895/50856/1524/10457/9473/653361/4818/716/5066/115992/22808/713/712/1136/152007/3001/51177/9021/116441/714/127254/7940/9369/81553/1230/64581/3122/10418/1117/864/1306/27303/929/79930/26002/80183/2123/7805/23048/4050/3082/25797/219654/6622/54518/7846/2/529…
PID_BCR_5PATHWAY	63	-0.464209	-1.53738	0.00530035	0.0244245	0.0156199	2003	tags=24%, list=11%, signal=21%	5532/2113/5295/9467/971/5336/5452/695/4772/11184/930/5788/974/973/933
CADWELL_ATG16L1_TARGETS_UP	97	-0.438642	-1.5365	0.00713012	0.0299311	0.0191415	1739	tags=24%, list=9%, signal=22%	7069/3240/9021/114897/259217/29121/7018/11185/5733/9332/27253/51156/151887/1675/54440/4023/3952/56776/729359/948/5346/2167/9370
SHEDDEN_LUNG_CANCER_GOOD_SURVIVAL_A12	273	-0.386963	-1.53635	0.00342466	0.0186029	0.0118969	4411	tags=40%, list=23%, signal=31%	6722/200316/6559/3275/135/7597/92482/51303/11247/6540/9709/9372/81567/57823/9374/388650/10444/4842/3699/57506/79877/79931/3242/51135/4189/8778/23389/4880/23522/100129250/2624/23312/22982/3384/3002/9468/51465/3568/54149/23433/6509/5019/5172/2852/9697/6782/79770/25837/8303/6397/57125/2867/10409/608/10570/79627/27299/11314/259197/535/5368/22983/1215/6480/160518/11248/3897/9473/11178/11251/23057/7832…
SCHAEFFER_PROSTATE_DEVELOPMENT_6HR_UP	150	-0.412024	-1.53506	0.00170358	0.0149503	0.00956095	2546	tags=26%, list=13%, signal=23%	55819/1519/38/24149/6507/7305/23683/85458/1359/2277/7432/5742/11251/5787/3067/8639/409/8503/26468/161198/25797/687/55340/81035/139818/57381/8910/284129/64231/26033/27244/8404/56920/8436/10563/5579/22915/4969/2167
MEISSNER_NPC_HCP_WITH_H3K4ME2	473	-0.365418	-1.52986	0.00155763	0.0149503	0.00956095	2640	tags=30%, list=14%, signal=26%	64208/79822/552/84570/157869/256536/55803/54898/55509/8291/4920/57125/84871/6615/2898/79827/10570/9024/164045/7351/117581/151449/421/7434/54769/10507/8900/23180/3394/128853/8913/3090/441151/6517/85449/109/27439/53346/144423/25903/91522/170692/65998/115557/3776/51085/1831/64921/7482/1620/119587/154/23237/4885/4145/5787/55698/135295/65266/2199/6620/79856/5244/161725/388121/256714/6324/203447/91624/…
SOTIRIOU_BREAST_CANCER_GRADE_1_VS_3_DN	51	-0.484488	-1.52576	0.0127505	0.0462464	0.0295753	4708	tags=47%, list=25%, signal=35%	81493/55701/10157/79864/64784/80127/79846/11215/54737/643641/10129/4054/79901/80108/8382/57728/85458/1524/1153/6777/90627/6595/1408/27244
REACTOME_NCAM_SIGNALING_FOR_NEURITE_OUT_GROWTH	63	-0.460518	-1.52516	0.00883392	0.0355796	0.0227537	1965	tags=46%, list=10%, signal=41%	5623/6708/9252/1463/2885/1291/256076/1280/1292/131873/5621/8913/785/6900/1285/1286/775/2675/8911/776/2534/7903/783/2260/8912/6710/57731/2674/4684
PEDRIOLI_MIR31_TARGETS_DN	397	-0.369631	-1.5237	0.00161551	0.0149503	0.00956095	3229	tags=31%, list=17%, signal=26%	55786/4811/84449/8829/56911/22982/7078/146433/56999/23462/283537/8740/90634/221264/153364/2055/376940/3142/23129/80310/2743/5172/134265/23017/1519/93035/8556/3274/7480/153241/6867/23189/5368/11149/1390/23195/23236/5027/7128/753/375775/374900/5924/57604/10677/22902/23077/51365/2277/7432/9429/114880/23284/8605/6444/7450/83543/27445/116835/23621/9590/5547/3908/118491/5629/1441/3563/6091/4325/10858/9…
LIU_PROSTATE_CANCER_DN	472	-0.364127	-1.52315	0.00156495	0.0149503	0.00956095	2676	tags=34%, list=14%, signal=30%	7223/9745/5376/1809/360/80310/64753/157869/231/1073/4638/117178/10052/90139/9723/3680/4660/114818/3912/79827/25943/151473/93649/9805/285598/6867/196740/8309/253827/115290/715/2040/8460/9638/2822/29940/4629/6571/151556/221895/7145/1952/1831/10451/716/25802/5295/22808/54492/79656/4744/7482/8844/10536/8516/340527/100131755/196883/80760/51285/114897/4921/2034/5311/9590/8639/1410/116535/10418/3945/439…
QI_PLASMACYTOMA_UP	248	-0.385303	-1.52298	0.00332226	0.0182666	0.0116818	2819	tags=34%, list=15%, signal=29%	3568/10068/63940/9423/397/694/1844/7942/1154/1803/3824/5783/3689/5996/8807/241/3394/7128/59345/9466/26253/10677/50615/6348/5742/51177/4046/7940/2322/1230/4261/9051/150372/50852/9532/83937/23228/3055/9450/6689/7185/924/26228/4050/11262/2791/3815/51225/8530/3560/2268/10154/4068/915/6351/6352/917/920/6504/729230/23179/1269/1234/1436/10875/1776/5341/963/6503/930/7535/9770/596/916/951/3059/3936/640/34…
POOLA_INVASIVE_BREAST_CANCER_UP	269	-0.383463	-1.52277	0.00337268	0.018522	0.0118451	2257	tags=38%, list=12%, signal=34%	8564/27299/2212/3687/3689/7941/6646/56833/22795/9404/6999/3394/10734/10257/3371/54806/6571/942/11010/9473/6348/11006/199/3001/3109/64092/4332/7940/8477/1230/64581/9051/22797/50852/10288/2123/7805/2359/1118/9595/7185/866/4050/6362/11262/9023/7462/3117/913/8530/10859/2533/1880/915/6351/3937/55885/29909/5979/2124/9332/695/9938/939/952/7852/4327/923/55843/1043/5552/5341/3676/963/5999/914/6503/3003/67…
WANG_MLL_TARGETS	283	-0.380412	-1.51834	0.00339559	0.0186029	0.0118969	3444	tags=39%, list=18%, signal=32%	6776/345274/26191/1280/9781/28514/2153/1292/54829/2242/56129/29116/2882/3747/10003/399694/254228/126/154043/90161/392255/56977/5866/552/397/2028/92211/3356/55819/22862/9173/1903/1844/7056/367/9734/1154/79827/55063/117581/284/3759/9404/7424/8913/2255/490/5797/338707/1896/344558/83468/3290/23194/65266/6660/84159/3945/5737/10404/929/253738/64094/80183/79689/27330/4825/3569/10687/6547/443/23328/25992…
MIKKELSEN_NPC_HCP_WITH_H3K4ME3_AND_H3K27ME3	206	-0.392805	-1.51726	0.00503356	0.0234497	0.0149965	2595	tags=31%, list=14%, signal=27%	5100/92211/5172/153020/90139/3736/123041/26011/651746/1392/11248/384/133584/57540/430/2254/64405/55220/4747/344558/84867/25924/23057/5799/64377/64506/8320/10893/64094/3738/85442/6304/23416/84254/2643/27319/91584/11095/2774/127435/5979/130026/5733/869/5923/7852/6869/286336/23542/205147/7275/3778/23336/7425/2313/8120/8941/3899/9118/3800/5649/6387/4804/5126
MIKKELSEN_NPC_ICP_WITH_H3K4ME3	434	-0.36434	-1.51411	0.0015949	0.0149503	0.00956095	4070	tags=32%, list=22%, signal=26%	55815/79140/167410/54838/1463/115111/79661/2134/6451/142679/164395/59353/5087/56521/84276/55294/4035/161253/157773/761/145407/65991/2115/56204/3988/29952/7802/344148/7097/80298/56895/800/126820/84189/1497/285676/51088/245812/57326/57545/9468/1184/130752/112483/23643/80128/23135/9465/23229/9755/89927/57496/80315/285025/84446/2852/8536/1519/6948/222658/130132/114798/123/9734/84814/167838/1607/34773…
LI_INDUCED_T_TO_NATURAL_KILLER_DN	135	-0.410939	-1.51131	0.00515464	0.0238709	0.0152658	3917	tags=40%, list=21%, signal=32%	64919/5549/10444/80757/1291/55719/53373/2731/100505573/89796/79575/57605/1840/200010/401548/6915/90634/7267/492311/333929/10077/1803/3119/6867/8460/2113/6480/718/3709/6368/3112/975/1493/11188/66000/56944/253738/28984/6304/157695/122618/2533/4068/915/939/286336/923/55843/420/914/6503/10659/5579/6387
RUTELLA_RESPONSE_TO_HGF_DN	235	-0.383729	-1.5078	0.00498339	0.0233559	0.0149365	2439	tags=33%, list=13%, signal=29%	1241/8648/11280/4122/3384/9489/7091/5997/4033/11027/694/55022/55509/123/9734/3490/11314/9647/9020/64780/10982/3084/23387/6480/23108/728/942/1524/1153/199/11156/9467/64174/864/10288/114548/929/80183/2357/23228/9450/28984/23048/1958/9308/4005/3117/51338/55799/2533/2205/2534/23240/3385/9332/56255/5175/64231/7852/9459/4208/1043/3676/1675/5199/221692/313/11184/3683/26112/9935/2219/6402/962/10235/26051…
TORCHIA_TARGETS_OF_EWSR1_FLI1_FUSION_DN	305	-0.373807	-1.5047	0.00338983	0.0185943	0.0118913	4322	tags=42%, list=23%, signal=33%	10287/55144/27010/25814/2887/54875/57026/3108/51303/7570/143282/6540/80778/10656/291/23531/317649/126308/5087/9057/55316/122060/7187/10602/9873/123016/64759/3988/22836/83938/83593/9781/57605/2153/9455/51088/4122/222487/91947/9497/90634/5332/6608/7325/5019/23177/80310/80108/8556/1844/2908/945/8654/1266/57608/2037/10389/117154/7305/284/23266/23683/7431/1215/53346/65998/6368/84861/975/79895/4818/745…
RASHI_RESPONSE_TO_IONIZING_RADIATION_6	75	-0.445023	-1.50101	0.0127737	0.0462948	0.0296063	1781	tags=37%, list=9%, signal=34%	5305/2213/6279/6355/126/4283/8809/7305/6368/1438/51177/11156/2123/7805/752/6352/729230/6288/7852/399/55089/5199/962/10320/10563/5788/974/931
KIM_GLIS2_TARGETS_UP	79	-0.438322	-1.49862	0.0106572	0.0407769	0.0260775	3396	tags=46%, list=18%, signal=38%	7097/597/4811/6355/2207/2200/10673/4147/11025/3119/2212/7431/718/199/285313/3109/9021/1634/4046/10418/1306/5156/4050/6352/5157/729230/1490/6347/4239/8404/4256/1805/7373/4969/6387/6366
RUIZ_TNC_TARGETS_UP	155	-0.401072	-1.49719	0.0034662	0.0186029	0.0118969	2977	tags=30%, list=16%, signal=26%	7025/23462/4054/2294/5627/54149/79822/5660/694/10957/8654/3490/57608/5783/11037/6999/23635/7079/25903/3554/55790/9627/84159/9962/5156/348/6091/8611/90362/219654/2/687/7216/23768/9079/6414/25840/115207/9037/4121/9935/5168/56967/1191/6616/6387/7857
REACTOME_ACTIVATION_OF_NMDA_RECEPTORS_AND_POSTSYNAPTIC_EVENTS	92	-0.42823	-1.49078	0.0141844	0.049859	0.0318857	3754	tags=37%, list=20%, signal=30%	5566/57554/10382/815/81027/2905/4900/57576/5567/347733/8536/5573/2890/814/320/9647/2893/3084/5924/8825/4747/27330/84254/7846/22843/5923/1742/1740/5577/4137/107/2891/2892/816
ACEVEDO_LIVER_CANCER_WITH_H3K9ME3_UP	127	-0.406672	-1.48971	0.00510204	0.0236743	0.0151401	2626	tags=28%, list=14%, signal=24%	7226/8742/116449/23026/84547/55068/401190/23373/3776/57593/154810/22998/128344/80228/9369/66000/168667/57683/11281/10404/221806/26034/57562/387357/80031/2533/54491/783/28986/83988/4674/10242/4857/54331/287
LEIN_MIDBRAIN_MARKERS	83	-0.431296	-1.4867	0.00880282	0.0354849	0.0226932	3535	tags=41%, list=19%, signal=33%	10916/57084/2262/2741/186/4054/57685/79776/26052/79722/2047/90668/5860/1389/1831/8001/54796/8938/1644/1306/253738/9001/6547/9308/5630/8788/57687/5354/5026/1047/183/2674/5730/27344
TAKEDA_TARGETS_OF_NUP98_HOXA9_FUSION_6HR_UP	83	-0.430099	-1.48258	0.00880282	0.0354849	0.0226932	2673	tags=40%, list=14%, signal=34%	23554/6326/51313/2770/8564/55137/5783/5350/11010/353189/5274/79772/64805/22998/1602/5090/2322/767/5334/5101/2123/51338/2289/27253/2252/9760/157/6775/969/10203/3512/8436/3575
KEGG_LEISHMANIA_INFECTION	69	-0.444183	-1.4824	0.0124777	0.0456473	0.0291922	4675	tags=49%, list=25%, signal=37%	3593/6885/2209/3127/3553/3108/3586/5777/51135/7097/3717/3684/3123/3119/2212/3689/7099/718/3112/653361/3109/4689/3122/6300/5600/7043/3111/3117/3113/3118/3115/3676/1378/5579
AFFAR_YY1_TARGETS_UP	188	-0.385738	-1.47974	0.00661157	0.0290818	0.0185983	2812	tags=34%, list=15%, signal=29%	5332/140578/53342/7166/4621/25778/3298/27295/54898/5372/3680/1310/256435/11155/10868/70/6517/21/654/4885/155066/11156/4118/7832/6638/1410/3945/19/5629/7490/64506/8722/6492/1501/94241/18/2533/4068/1843/50859/3718/6414/869/3400/3820/57468/3791/2202/64641/2719/10266/84707/56853/4675/23208/1036/4135/53826/2892/7345/1191/931/4804
TARTE_PLASMA_CELL_VS_PLASMABLAST_UP	376	-0.359187	-1.47227	0.00164745	0.0149503	0.00956095	2300	tags=27%, list=12%, signal=24%	2784/1995/7480/9338/3687/2548/9647/7691/23189/216/241/9638/2822/3707/7128/70/553/3371/1435/2841/10457/1831/1359/3240/3112/1153/716/5066/6609/3087/8516/3487/3001/3120/4855/4921/6812/7832/1493/1410/4359/971/7940/10461/8506/140885/926/348/4325/7043/6689/1756/7185/6304/862/25797/5217/1958/6622/3117/2324/3164/2268/1066/915/2487/5064/1843/1123/8613/54738/6367/947/1742/6710/1378/774/7074/3778/5577/4753/…
CHYLA_CBFA2T3_TARGETS_UP	367	-0.35778	-1.46713	0.00326797	0.0180105	0.011518	3236	tags=35%, list=17%, signal=30%	6919/3101/80896/51088/11279/9331/220963/222487/114826/3002/497189/6915/125488/3568/23433/2151/115761/56977/24146/2149/397/134265/375449/6948/1844/945/2867/4004/64651/2212/3818/2081/55151/241/715/3084/5027/3707/1558/26253/53346/1524/8851/1831/50615/3240/11228/29967/338707/10865/79895/79772/4818/5742/5066/10261/84329/100131755/3001/3067/80760/3290/4689/23621/167359/7018/8477/3945/6688/22797/30845/4…
GRAHAM_CML_DIVIDING_VS_NORMAL_QUIESCENT_DN	85	-0.422671	-1.46669	0.00869565	0.035144	0.0224752	3059	tags=40%, list=16%, signal=34%	79870/57415/5734/10346/3142/1519/8809/3119/1390/11010/1393/3423/22998/9467/5101/2123/9595/1756/23048/9823/9023/3117/3113/6925/2982/53335/2078/3131/6402/4345/140597/10563/5788/6363
SHETH_LIVER_CANCER_VS_TXNIP_LOSS_PAM5	105	-0.412133	-1.46647	0.0123239	0.0452978	0.0289687	2164	tags=26%, list=11%, signal=23%	6507/7099/4985/6671/753/134548/80169/51050/3112/152007/57537/161725/203447/6785/50859/1123/6504/3375/399/9037/3752/1996/115650/925/1047/4684/4804
LEIN_PONS_MARKERS	90	-0.42115	-1.46504	0.0124113	0.0455115	0.0291054	3587	tags=43%, list=19%, signal=35%	162466/10916/2670/11167/57084/2262/2741/22987/4054/5376/1809/9127/956/79722/2104/112609/3084/64072/6571/7145/1831/610/1593/8938/9590/8153/253738/326624/83937/9308/26353/8514/8788/5026/164633/1047/6285/27344/90113
REACTOME_G_ALPHA_Q_SIGNALLING_EVENTS	216	-0.375242	-1.4628	0.00495868	0.0232827	0.0148897	2812	tags=28%, list=15%, signal=24%	5332/8526/10125/2151/5997/2911/552/2149/2642/5330/3356/5581/84432/680/2867/2784/7225/1607/2828/5996/26575/23236/59345/553/6003/3709/115557/6368/5295/1908/4922/5028/57105/64407/51738/5583/8477/5737/8503/5588/10800/9002/2791/2641/27334/2829/185/695/6288/1902/6869/3708/2864/8490/5999/2788/183/1910/2786/10235/54331
RUTELLA_RESPONSE_TO_CSF2RB_AND_IL4_DN	316	-0.36023	-1.46021	0.00500835	0.0233751	0.0149488	3217	tags=32%, list=17%, signal=27%	80896/1241/8648/4122/259230/23312/3384/9489/6446/9120/7091/56253/23433/5997/4033/4947/11027/231/55022/7942/38/123/9734/3490/125058/11314/9647/7941/10982/9404/535/3084/23387/6480/23108/718/26253/53346/728/1524/953/6348/11326/11006/79772/4818/712/199/1593/9467/1230/9051/64174/719/10288/114548/929/80183/2357/23228/9450/28984/1958/687/3903/4005/3117/51338/55799/2533/1066/1536/2534/3385/9332/56255/517…
VART_KSHV_INFECTION_ANGIOGENIC_MARKERS_UP	161	-0.389373	-1.45797	0.00347222	0.0186029	0.0118969	2601	tags=35%, list=14%, signal=30%	2149/80310/694/4846/6356/57125/2246/7480/2047/284/7424/64102/55576/2277/5742/7482/6853/4855/1285/2022/57493/1306/5156/5764/3572/7043/3491/3569/3082/2042/2324/54538/6352/2487/5176/8788/7075/164656/5175/1234/3791/2260/23166/7852/10268/4327/8322/9068/7010/51162/10203/6424/4881/1901/3479/6387
WANG_SMARCE1_TARGETS_UP	285	-0.364062	-1.45569	0.00505051	0.0235052	0.015032	3632	tags=37%, list=19%, signal=30%	1601/55122/112574/57568/4919/22836/5396/10114/2555/9781/800/28514/4811/160428/4199/389432/9953/10129/84969/167681/57205/83872/8840/5627/90161/23129/5376/1809/79901/2149/84898/4147/1540/27018/157869/4638/1903/29995/57608/5783/93649/22795/6999/4163/2040/23236/57088/23101/3488/23646/25925/84952/3554/5924/10677/128553/2308/716/3075/6383/152007/3487/9021/2034/1634/1602/66000/19/7490/7436/121551/91624/…
MARKEY_RB1_CHRONIC_LOF_DN	115	-0.404071	-1.45012	0.0123457	0.0453063	0.0289741	3633	tags=43%, list=19%, signal=35%	761/7409/23710/51669/4803/3162/65997/79683/7078/5973/8840/10962/7166/26268/100506736/123/4481/7941/7305/23646/353514/6368/6348/713/712/1634/25849/714/9051/6688/719/929/348/3569/2791/4005/3937/23705/6347/64231/1436/23166/9145/5552/65009/963/5199/5788/7345
SENGUPTA_EBNA1_ANTICORRELATED	139	-0.390859	-1.44414	0.00683761	0.0292522	0.0187072	3783	tags=37%, list=20%, signal=30%	144608/4616/27036/84687/144132/57716/91409/1497/2624/79683/79734/8557/8740/63893/3755/440712/116236/285025/1540/143425/2889/55679/7942/1154/84872/285598/23125/284654/221472/51199/3423/124997/283848/23263/1493/29121/393/752/8911/8514/54491/165631/919/29993/340348/64926/23208/80342/115350/26999/11170
IVANOVA_HEMATOPOIESIS_STEM_CELL_LONG_TERM	207	-0.372723	-1.43914	0.00675676	0.0292404	0.0186997	2849	tags=32%, list=15%, signal=27%	342357/9363/221458/23433/49855/84898/729438/128077/4886/2044/2037/2548/943/117581/23390/284/168544/1112/128853/57088/139735/5350/7402/54332/84952/7145/83700/361/104/79656/27445/6095/8578/775/285368/5629/5101/140706/5803/9435/53616/9901/85442/7185/1759/22859/79739/9079/203190/81704/7903/1272/27145/7075/23492/283383/1960/58494/1996/26040/23466/26960/3131/57535/56776/57369
CAIRO_LIVER_DEVELOPMENT_UP	160	-0.384081	-1.43888	0.00694444	0.0295234	0.0188807	3422	tags=35%, list=18%, signal=29%	5961/56995/6926/58155/9324/56925/2697/7025/25800/8840/7267/57124/9727/51666/10052/8303/10409/8936/23266/827/223117/3488/84861/29967/6604/8516/51309/2619/6595/7490/23090/5156/10763/10800/5764/23037/6304/23270/9823/5217/10000/8434/23024/22859/4692/6594/7216/9079/81035/2260/5270/11184/51466/5802/1910/51705
REACTOME_L1CAM_INTERACTIONS	120	-0.396032	-1.43747	0.0138648	0.0488829	0.0312614	2722	tags=29%, list=14%, signal=25%	5962/6334/347733/6326/26052/3680/3912/6335/3897/6329/6900/2596/8506/6327/6324/27330/3785/1759/7846/1641/1272/2260/6330/6328/1742/6710/6456/57731/10752/55800/6332/4897/4684/23114/287
MCBRYAN_PUBERTAL_BREAST_4_5WK_DN	189	-0.375388	-1.43745	0.00834725	0.033912	0.0216873	2509	tags=25%, list=13%, signal=22%	5581/64397/38/2037/9444/2180/22795/535/2040/6517/2113/85329/3776/51085/7145/64499/28996/10019/130399/56301/28999/3487/6567/2034/4359/203447/57678/3491/590/10580/4692/7075/1149/1003/81849/9479/7704/5026/925/3777/4023/2819/3745/2273/5166/2167/91851
PEREZ_TP53_AND_TP63_TARGETS	202	-0.371361	-1.43561	0.00827815	0.0337724	0.021598	3551	tags=38%, list=19%, signal=31%	57568/9891/3768/83593/4880/131583/30812/9828/5228/2258/6770/29116/10129/9394/399694/2294/10125/154043/9423/56977/360/9727/642/55803/25861/10570/151473/80055/6867/10507/384/84952/1831/9473/4747/8844/1410/6095/121551/26002/9435/4093/28984/57690/1958/219654/83716/8447/23328/54491/5979/6414/85358/116362/8613/9760/3400/134111/85352/9459/54873/164633/170302/9353/107/9935/3777/54855/57134/22861/23136/26…
CASORELLI_ACUTE_PROMYELOCYTIC_LEUKEMIA_UP	153	-0.385182	-1.43456	0.00696864	0.0295724	0.018912	3396	tags=33%, list=18%, signal=27%	7097/23389/23522/1521/30817/2258/23312/29116/90634/5997/9931/22848/694/6843/945/3490/8869/8900/23236/2334/23387/23108/11010/1831/23258/5551/2322/439921/2123/28984/3082/10370/8905/1880/915/1843/10225/5325/9938/23166/5140/1675/5199/925/51816/22861/9214/8115/5730/2354
LENAOUR_DENDRITIC_CELL_MATURATION_UP	115	-0.399732	-1.43455	0.0123457	0.0453063	0.0289741	2281	tags=34%, list=12%, signal=30%	1803/3119/2212/9805/8900/3707/6480/1435/942/713/3290/6638/5311/348/2162/6361/9308/10370/2/3117/8514/3113/1843/3115/894/6039/6367/1776/3662/1378/6503/911/8013/2208/5168/4023/4360/1236/2167
FULCHER_INFLAMMATORY_RESPONSE_LECTIN_VS_LPS_DN	431	-0.34264	-1.42353	0.00317965	0.0175445	0.01122	3593	tags=32%, list=19%, signal=26%	9846/143458/5151/2799/112574/64207/1513/80833/2358/162/23522/9644/3162/2015/284443/30817/80896/4199/56925/84268/23312/200942/664/6446/5734/4155/9120/10346/10147/283537/4283/256586/83852/5567/5962/123872/11027/79888/11025/54557/2908/8291/123/6614/11314/9444/441168/23189/7099/55691/216/2040/9956/3707/59345/144165/490/23635/51311/25903/10457/23062/22902/29967/653361/79066/716/340152/199/3109/9021/51…
ASTON_MAJOR_DEPRESSIVE_DISORDER_DN	154	-0.381062	-1.4181	0.00699301	0.0295951	0.0189265	2722	tags=25%, list=14%, signal=22%	5962/5376/22848/5158/2044/23547/7259/11155/5027/83700/6900/5295/347/472/4118/1410/7018/28513/5588/2123/9679/3991/443/50859/5923/1902/5354/7074/192683/4137/5168/4915/4821/9705/23114/333/23025/10351/5126
XU_GH1_EXOGENOUS_TARGETS_DN	104	-0.397439	-1.41483	0.013986	0.0492358	0.0314871	3355	tags=29%, list=18%, signal=24%	9781/2072/6557/6446/80380/9497/116931/93190/80108/8556/141/2104/5837/6671/2822/5924/4246/22797/775/9962/9099/23148/6594/8514/29909/1996/171024/57134/2572/9892
GAUSSMANN_MLL_AF4_FUSION_TARGETS_G_UP	235	-0.359194	-1.4114	0.00830565	0.0337724	0.021598	3043	tags=29%, list=16%, signal=25%	29906/50846/4781/92999/1184/126/140578/7267/56253/79845/1836/388630/54839/9127/25/4856/4920/201229/79827/125150/129080/387758/10194/284/744/718/1959/7057/84867/2596/84159/116535/81553/2302/27065/26167/253738/1501/23500/4692/114815/81704/64231/83988/10268/5026/27239/257194/56853/51162/143686/23208/4137/8404/2313/10894/1400/23089/23732/962/1545/55619/2786/3479/9705/7345/6403/5649/1114
YAUCH_HEDGEHOG_SIGNALING_PARACRINE_DN	236	-0.35835	-1.40829	0.00665557	0.0290841	0.0185998	2565	tags=24%, list=14%, signal=21%	115948/4685/27295/55805/157869/9723/140767/2890/845/57643/112609/26032/89890/5837/10324/51161/345895/429/64067/26045/6262/2206/54212/114880/84435/7140/29121/1286/50852/283417/5101/6492/9481/340533/23500/2/57575/23768/8788/11341/939/3400/10290/940/164633/7143/774/8835/3760/22806/3757/115350/7060/3603/3642/222962/7276
HAHTOLA_MYCOSIS_FUNGOIDES_SKIN_UP	175	-0.369938	-1.40709	0.010101	0.0389682	0.0249208	2605	tags=22%, list=14%, signal=19%	57496/80310/29995/1102/1266/125058/9638/50856/1831/1359/1153/23258/3075/7940/9450/6304/6622/3117/7122/6925/9079/81035/9535/5176/894/2192/9760/3708/1043/9037/58494/8490/2078/6503/4915/9452/3575/2532/6363
PEREZ_TP63_TARGETS	341	-0.344397	-1.40219	0.00656814	0.0290067	0.0185503	3402	tags=34%, list=18%, signal=28%	83593/4880/131583/1735/3957/392617/30812/9828/1827/5228/2258/6770/29116/10129/23462/9394/399694/342357/57685/2294/10125/57221/154043/9423/56977/360/9727/57616/642/55803/55679/25861/114818/64651/1995/10570/151473/80055/6867/2180/10507/1112/114757/80318/384/84952/10677/1831/9473/4747/90594/8844/130399/9021/1410/5583/6095/121551/864/9945/26002/9435/80183/4093/28984/57690/1958/219654/83716/80031/3815…
MIKKELSEN_NPC_HCP_WITH_H3K27ME3	341	-0.342451	-1.39427	0.00656814	0.0290067	0.0185503	2612	tags=29%, list=14%, signal=25%	9745/84966/168002/388336/57699/256536/124842/238/57125/333929/163933/30009/7225/146713/9427/4985/83482/284654/25830/22983/80725/7133/138046/23108/6262/2850/159296/56934/145581/27112/654/353189/610/6900/55118/4744/79605/9607/54796/23349/4118/54345/491/2322/4062/1306/23105/326624/5179/6492/3055/2899/3785/23467/4825/57338/222865/114805/157695/5630/83648/5241/81035/140689/6258/81704/345630/54738/5746…
RIGGI_EWING_SARCOMA_PROGENITOR_DN	185	-0.364729	-1.39273	0.0116667	0.0431879	0.0276194	2091	tags=33%, list=11%, signal=30%	10194/9404/715/23236/727936/25925/3776/3554/51435/8614/5742/716/55790/117248/3598/83468/54796/1634/23621/116535/1842/10418/1117/5737/5010/57493/5156/5764/9945/26002/4325/55504/113263/57562/3082/10082/23024/5136/3113/55084/7049/11341/8613/8839/2192/2252/27115/79987/1879/10216/130497/5142/1047/6424/8406/1191/7373/5166/54331/6387/6586
KEGG_MAPK_SIGNALING_PATHWAY	266	-0.348713	-1.38879	0.00819672	0.0336323	0.0215084	2288	tags=21%, list=12%, signal=19%	2246/4914/2768/9020/115727/5532/25780/8913/2255/5322/785/3554/5924/2254/22808/84867/6300/775/409/5156/929/5600/7786/7043/2257/27330/4215/8911/10000/776/55799/3164/1843/2252/5778/783/5923/2260/2259/8912/9479/4208/23542/781/774/4773/11184/4137/26279/4915/5602/10235/5579/773/9254/5320
REACTOME_PLATELET_ACTIVATION_SIGNALING_AND_AGGREGATION	258	-0.347119	-1.37814	0.00996678	0.038514	0.0246303	4040	tags=35%, list=21%, signal=28%	801/7094/1608/57113/5054/2885/3699/5777/9749/57406/7273/78991/7409/10916/1/5582/2153/2244/1521/152/2793/146850/2207/7078/6915/8526/5627/10125/2151/54495/22927/5660/2149/5581/2784/7225/2770/2768/1607/7424/59345/10257/3709/2157/10451/2277/5295/64805/7057/5028/7450/5583/7018/409/5336/8503/5588/7043/2811/9002/2162/2791/3082/54518/2/5294/3937/6414/2534/5175/23533/7123/3708/11069/5552/5341/1675/5345/27…
HORIUCHI_WTAP_TARGETS_UP	286	-0.343852	-1.37401	0.00679117	0.0292404	0.0186997	2999	tags=29%, list=16%, signal=24%	84734/29116/2615/23462/2200/114801/83872/9363/22881/5997/5376/8493/5621/6948/92017/2908/352999/100101467/58491/2550/8869/3759/23180/387763/1112/140775/7128/54332/3709/5797/1435/51062/170692/3554/28962/953/83464/8614/5742/3075/22998/5547/84159/6095/22797/19/56944/7436/10404/9435/83690/113263/23037/25797/8905/8434/6401/81035/9839/8745/8613/27253/9077/85453/6347/89857/3708/420/65009/3676/5270/84707/…
KUMAR_TARGETS_OF_MLL_AF9_FUSION	390	-0.333107	-1.37213	0.00645161	0.0285461	0.0182557	2836	tags=27%, list=15%, signal=23%	2620/7070/25864/256586/2151/6608/60481/2583/2149/2028/79888/80108/9173/55565/5727/57157/10409/643/9420/3824/1310/2550/7941/284/715/5174/59345/6480/7782/384/353514/2206/10501/80169/2006/1359/472/29851/3001/3067/11156/4332/714/971/401612/11168/5588/8320/284307/255231/5179/55504/22936/256949/6689/6304/57713/4050/9823/9308/10370/8434/51338/11040/8514/6352/2205/27240/2534/29965/939/1003/51617/1879/545…
VERHAAK_AML_WITH_NPM1_MUTATED_UP	176	-0.360284	-1.37196	0.0117647	0.0433789	0.0277415	3763	tags=40%, list=20%, signal=33%	29887/58504/79068/29970/2799/6691/63895/7799/3162/3957/597/1514/2015/3101/23312/29992/80310/11025/27018/8536/64170/10409/11024/2212/2180/7099/3759/25780/7128/10257/728/942/1524/353514/6368/6348/653361/79772/713/712/7057/9627/5090/1230/64174/108/719/10288/54504/929/2357/3055/3569/2643/1511/10859/2268/6351/59342/6414/9332/10875/5341/5577/9935/2219/1545/23136/5806/1191/948
BERTUCCI_MEDULLARY_VS_DUCTAL_BREAST_CANCER_DN	167	-0.363244	-1.37112	0.0102215	0.0393678	0.0251764	3539	tags=37%, list=19%, signal=30%	199964/4882/442319/11167/9644/8038/800/51226/1827/8648/399668/3779/245812/7078/57685/7267/84056/80310/4638/54510/55679/29995/8654/25943/320/253827/359845/144165/51062/1524/975/89795/2977/90627/4921/6638/8639/3908/358/439921/5803/10979/23331/1501/2042/219654/4628/23705/138311/79750/10290/22979/9037/8490/10395/5999/222223/7060/91653/2273/6586
WIERENGA_STAT5A_TARGETS_DN	184	-0.357644	-1.36674	0.00991736	0.0383548	0.0245285	3370	tags=38%, list=18%, signal=31%	340205/9644/348093/55501/8676/2207/84519/4781/5627/55024/11027/727/84898/5330/8536/4638/10077/9338/79627/9647/284/253827/10868/3394/25780/3707/203328/2113/9811/80301/85329/83700/1183/122773/54438/7450/64407/2053/7940/2983/2701/5336/929/79930/2811/2791/1511/7122/147138/2205/202309/5176/8788/59342/10225/10810/8832/5175/22918/7852/22846/5341/285195/4675/11151/6297/2219/8436/6403
SHETH_LIVER_CANCER_VS_TXNIP_LOSS_PAM4	276	-0.342557	-1.3622	0.011925	0.0439007	0.0280752	3655	tags=31%, list=19%, signal=25%	169355/761/23710/57706/36/80833/5800/1807/154791/2213/5648/5745/127/1757/6821/6649/23498/90634/2620/9423/63826/116236/2028/339390/642/6943/3680/38/51293/27299/56479/54386/2180/23031/5864/216/3488/1558/30837/55576/5860/165530/29958/6567/1634/2053/2619/1410/959/5789/30845/1644/7043/10858/23743/23270/2643/8434/18/4692/10154/11185/9839/912/9332/8777/3400/1234/2202/2823/55061/1776/57453/7123/5618/5270…
RUTELLA_RESPONSE_TO_HGF_VS_CSF2RB_AND_IL4_UP	407	-0.326136	-1.34939	0.00636943	0.0283167	0.018109	4021	tags=36%, list=21%, signal=29%	6283/81501/5054/3586/57823/10384/427/11117/366/4053/91752/29887/79931/3992/1601/54/7187/2799/64759/1513/271/55852/10912/2730/1514/80896/4199/8648/8829/56925/6355/4122/259230/23312/2760/3384/9489/6446/9120/4283/7091/56253/23433/5962/4033/6509/4947/11027/231/55022/7942/38/123/9734/3490/125058/8564/27299/11314/2768/6507/7941/10982/56833/9404/535/2040/8460/23387/6480/23108/718/26253/8760/53346/728/15…
RICKMAN_METASTASIS_UP	333	-0.332255	-1.34863	0.00825083	0.0336963	0.0215493	4207	tags=29%, list=22%, signal=23%	199953/80127/117247/5884/285989/23398/92806/606495/55167/91754/51321/79921/130916/10771/57325/84307/80303/25817/9848/23710/55250/80823/7572/9016/51616/80095/9358/80298/79707/23178/1911/7029/7741/4204/348801/26122/56999/9852/5332/8493/2778/27018/51306/79770/2669/3680/10513/8975/55028/196740/57613/5587/8460/727936/619208/54806/83700/11228/283578/11041/344558/51285/51309/9863/4921/5547/3908/340542/1…
YAGI_AML_WITH_11Q23_REARRANGED	335	-0.331391	-1.34578	0.00822368	0.0336425	0.0215149	3216	tags=27%, list=17%, signal=23%	7029/9681/1292/8518/23312/9941/22982/7078/6915/9468/90634/26953/4033/6509/2874/3682/2743/8536/231/56145/2908/9734/2898/129080/1995/1803/2770/6103/4914/9444/6899/6867/151449/7434/5837/241/25780/9638/23101/284439/109/9811/3709/26049/953/27285/9576/3423/975/8825/472/11156/1602/5090/10178/23357/2302/5336/5588/2995/7805/8905/6886/23328/5293/23705/1536/3718/8745/894/5979/23240/5325/1490/2824/2823/3570/…
JAATINEN_HEMATOPOIETIC_STEM_CELL_UP	308	-0.332489	-1.34022	0.00844595	0.0342237	0.0218866	3153	tags=30%, list=17%, signal=26%	23468/2624/9331/79870/57473/147991/29902/114801/22881/153364/5332/154043/5962/1809/2149/389206/375449/3680/56981/3490/2770/151473/84547/9805/114991/6335/8936/284/55151/253827/216/23236/23635/25925/65998/159296/1393/10451/1359/5066/3075/3087/22998/51309/5311/2322/23111/22797/6595/84327/283417/57631/221806/83690/23037/9481/286097/50810/9823/79884/10000/51237/3815/4692/6594/7216/5136/80243/50859/641…
CHANDRAN_METASTASIS_DN	305	-0.331024	-1.33248	0.0101695	0.0392	0.025069	2706	tags=30%, list=14%, signal=27%	81617/221662/79901/6096/121274/1519/57616/1073/4638/1844/4856/54510/55679/57659/8654/4660/2737/1803/29951/2550/117581/146713/10100/23546/4163/5532/7782/54806/1959/246175/7145/83700/51050/1153/2941/2949/4744/5028/80760/51285/51309/90627/128344/4921/7832/5799/25849/56172/79966/116535/91624/5764/26002/64094/83937/28984/285671/2042/83716/26353/10580/51676/3164/89853/166336/1843/50859/127435/4045/1008…
YAGI_AML_WITH_T_8_21_TRANSLOCATION	362	-0.32054	-1.31341	0.0097561	0.0377624	0.0241497	2841	tags=26%, list=15%, signal=22%	5297/4267/3568/3697/7267/3123/433/6509/23129/2874/10156/23177/2778/10957/4856/23225/7915/10409/3119/643/2037/2212/9805/26278/9466/109/6571/2206/653361/5295/7594/1620/199/2977/6777/3109/9021/4916/80228/84159/7940/3122/4261/23111/1441/50852/7436/28513/8722/6091/2995/9754/7805/23331/862/4059/3815/3117/10666/3113/5064/3718/3115/10225/2982/5325/8839/5452/695/6585/54738/2824/83988/9145/947/9459/3708/42…
FLORIO_NEOCORTEX_BASAL_RADIAL_GLIA_UP	369	-0.319639	-1.31034	0.00819672	0.0336323	0.0215084	3382	tags=30%, list=18%, signal=25%	57084/9358/1237/160364/2262/22987/114905/11280/8829/389432/26258/340267/3384/22798/56999/10346/144321/170591/4283/3568/154043/4033/440738/79822/143425/116449/9173/54510/79722/100506736/57125/680/3824/93649/91937/196740/112609/23266/253827/9507/11149/285966/429/2113/83478/84952/10451/7057/130399/54796/6444/57105/9687/283298/54058/168667/653567/81788/57477/8320/5179/165186/400954/23704/57713/199920…
KINSEY_TARGETS_OF_EWSR1_FLII_FUSION_DN	319	-0.321022	-1.29973	0.011745	0.0433746	0.0277388	3986	tags=36%, list=21%, signal=29%	9500/79630/23187/115111/4673/23112/147906/91752/4774/1601/116039/9846/2799/57568/55250/10234/9891/27250/29952/151963/11167/100505573/5745/347252/55816/11096/200942/4758/57326/29116/57722/2200/6448/4054/83872/84557/22881/10014/6096/5660/2778/694/4856/55022/54510/2669/3490/388403/64651/2770/92126/10194/284/55691/216/10324/387763/7431/1112/3488/490/3371/10457/56603/2308/9060/22998/10608/80228/84159/…
MATSUDA_NATURAL_KILLER_DIFFERENTIATION	458	-0.310481	-1.29659	0.0109718	0.0416054	0.0266074	2414	tags=23%, list=13%, signal=21%	252983/9211/1102/2669/123/30009/255057/2687/814/3824/1310/3818/55553/5996/6671/359845/55576/83478/53346/8029/56548/353514/785/1831/2277/23258/4818/7456/3487/4145/6567/9021/3290/4916/11188/2619/2022/5133/10461/7018/5551/1230/10418/4261/3945/401612/5789/767/9936/64506/255231/9450/6785/924/2042/5217/8434/51338/55799/3560/2857/6925/6351/6352/23705/4542/10663/9402/5325/4644/3764/919/3400/10290/1234/38…
ODONNELL_TFRC_TARGETS_UP	354	-0.313042	-1.28016	0.0130506	0.0472249	0.0302011	3436	tags=31%, list=18%, signal=26%	442319/53344/1280/57335/492/800/22987/4811/327657/26086/54329/6446/29116/4781/3684/10346/9468/2917/29850/340024/5997/6096/64393/22848/11025/694/4638/8556/1102/57157/56896/91156/57125/2898/388403/64651/56975/57144/3119/80008/7351/90668/5996/56833/11010/1524/353514/56934/80169/1831/84861/3112/3423/256158/5742/84622/9542/7057/28996/10608/57091/971/219348/7786/64005/6304/924/94241/124602/2643/114805/…
BONOME_OVARIAN_CANCER_SURVIVAL_SUBOPTIMAL_DEBULKING	487	-0.305381	-1.28008	0.00788644	0.0324351	0.0207428	2634	tags=23%, list=14%, signal=20%	51362/57496/2149/80310/22862/117178/5573/2889/7881/25957/2770/9759/4914/83989/23031/55691/23683/23741/2040/5532/9638/55036/29903/3488/7220/1435/11259/6935/83700/2157/9429/79895/25802/5066/5295/2949/9060/6383/22998/3487/4145/6777/81578/4223/1634/9627/5799/8850/1842/10461/81553/23111/6688/5789/8642/64377/9936/1306/5156/10404/3572/8925/221395/221981/862/64781/79633/219654/8434/23024/4692/5980/5136/5…
PASQUALUCCI_LYMPHOMA_BY_GC_STAGE_UP	274	0.312921	1.302	0.0118765	0.0437565	0.027983	4040	tags=38%, list=21%, signal=30%	3783/23555/6382/129642/85415/30001/6768/3664/83481/10205/4072/1212/444/6692/57715/5129/10653/7263/79056/784/116447/5831/10413/3693/57619/22822/9601/84418/27293/5464/54502/5445/3382/1051/5074/2526/7052/148808/23612/51629/5291/6238/54682/25996/10410/11014/9855/4363/7082/57222/6184/55353/10221/1832/2923/4642/3069/10945/64778/7873/960/9545/55825/54732/83707/10787/527/56243/55074/3703/10130/143689/550…
HELLER_SILENCED_BY_METHYLATION_UP	272	0.314427	1.3024	0.0121655	0.0447505	0.0286187	2057	tags=24%, list=11%, signal=22%	6286/3855/5645/4582/3918/7032/7262/6277/3429/7850/6275/1728/23555/822/3949/9245/55165/991/5347/7153/1063/2305/3303/26509/375790/3397/8870/1577/9235/55715/699/9620/891/999/6790/9636/78999/6624/8673/3486/55601/7205/9314/7127/6284/8942/5366/629/5371/899/4599/3437/8792/6303/23564/22904/7035/2239/330/10561/1056/3669/3176/29899/64135/901
REACTOME_INTERFERON_SIGNALING	197	0.334519	1.33169	0.0124688	0.0456473	0.0291922	3409	tags=27%, list=18%, signal=23%	23650/8638/3429/11074/2317/3664/2635/9636/4940/684/402569/2634/4939/5696/2537/5371/5595/6672/3665/3430/4599/3437/10107/10581/4600/7341/10410/3669/55706/6737/5580/85363/79023/960/3661/7316/1981/9246/81603/8519/6772/3840/3460/3135/9688/3659/80263/3134/9470/54739/567/3433/3106/57122
SENESE_HDAC3_TARGETS_UP	472	0.308182	1.33357	0.00275482	0.0152907	0.00977867	2927	tags=27%, list=16%, signal=23%	4233/8638/8091/80117/3159/4071/5801/57016/23657/6947/54795/3655/94122/1604/10643/1942/7430/55240/56938/2150/444/9235/130340/5266/5328/307/6696/1525/79180/7534/79695/144455/23204/6566/4323/598/4312/389/3216/8795/118429/4173/13/6744/9069/112616/58516/8644/1021/29766/57707/8942/51312/29113/4862/6318/5366/26751/3854/6319/3556/6364/51274/3297/650/5782/6374/1174/283209/51107/3437/9991/6303/6804/57552/6…
REACTOME_UB_SPECIFIC_PROCESSING_PROTEASES	186	0.339762	1.34402	0.00997506	0.0385141	0.0246304	4439	tags=33%, list=24%, signal=26%	991/890/4088/7416/79589/5721/5696/5698/5720/9986/7979/5423/7417/5699/8312/330/64135/5719/5686/10213/6881/8607/11047/7316/5707/55611/5684/5710/6478/9804/993/5706/5688/64426/5702/5687/5685/7186/5713/5691/5704/27430/5682/63967/5690/1080/5714/7375/5692/5709/9146/9960/3416/7189/5715/5695/5693/9097/10197/5708/5717/9100
DOANE_RESPONSE_TO_ANDROGEN_DN	237	0.32912	1.34878	0.00496278	0.0232827	0.0148897	2770	tags=30%, list=15%, signal=26%	7031/5652/7262/8612/1382/254531/10874/64129/983/6241/347902/22885/6237/444/79144/1948/124222/4088/2059/1846/3486/9249/4091/4173/114908/79071/9401/6548/29108/5696/8438/55286/79733/1848/51097/840/5083/10435/10733/22874/83463/412/3070/54503/10410/7421/54985/871/79679/10512/10036/5359/6187/5580/11001/1832/9238/2043/2817/83990/3418/8882/3667/8519/10293/115708/993/376267/1371/79022
CONCANNON_APOPTOSIS_BY_EPOXOMICIN_UP	235	0.331314	1.35457	0.005	0.0233751	0.0149488	2534	tags=26%, list=13%, signal=23%	7262/1728/302/9123/7739/23657/3303/22885/4072/1212/11145/2150/57146/27113/6696/9518/54498/645/8744/4084/4488/3315/5327/1846/9249/23764/283638/578/8795/8492/2195/7277/3310/79703/3337/23231/8644/23645/4000/1051/840/5590/6303/4051/9181/10539/7791/871/5719/10808/79143/5686/7328/10963/4254/11047/1649/960/1316/7378/171586/5707
KOYAMA_SEMA3B_TARGETS_UP	248	0.331459	1.35533	0.0075	0.0310291	0.0198436	2016	tags=22%, list=11%, signal=20%	3783/3918/5307/11187/1382/3099/3875/80117/3856/7869/64866/3710/132299/11226/5329/388115/23474/5328/10553/7045/9518/54541/55450/5493/81/6725/4257/5318/79589/9170/55357/54852/79628/301/8857/26872/25987/4862/5696/548596/1741/65124/10164/80271/93349/6672/5819/1396/162989/7114/347404/131566/138065/3959/79094
REACTOME_SLC_MEDIATED_TRANSMEMBRANE_TRANSPORT	249	0.331948	1.36003	0.00501253	0.0233751	0.0149488	2531	tags=22%, list=13%, signal=20%	6513/55630/92745/28231/11254/9123/54716/284111/23657/80736/5002/85414/115019/6581/55974/6549/6510/6566/3177/81031/389015/6574/1356/7355/23443/1468/23446/10568/6548/6717/283375/9056/6526/27173/64078/213/57153/6550/55343/10559/126969/84102/28234/65010/6558/51248/6564/347734/133418/9843/79751/7780/10999/11046/80024/861
REACTOME_EXTRACELLULAR_MATRIX_ORGANIZATION	300	0.324918	1.36197	0.00961538	0.0372796	0.0238409	2457	tags=24%, list=13%, signal=21%	1308/3914/5645/4680/3694/3918/3691/388743/3909/5650/3675/5644/10753/6385/6382/4316/726/4320/652/5339/1294/3673/3655/8754/375790/2266/50848/1301/634/101/55214/999/977/1515/6696/4323/823/5033/4312/1300/824/1504/8751/4017/780/3693/440387/59277/831/650/5663/4324/1311/4322/1303/102/2335/147968/6650/826/1605/871/1404/222663/79709/8573/1289/960/3696/92291/22801
HAN_SATB1_TARGETS_UP	411	0.318531	1.3643	0.00542005	0.02461	0.0157385	2383	tags=23%, list=13%, signal=20%	6286/7031/5645/5753/2810/688/1001/771/6819/2859/5644/6590/133/706/23657/57214/638/10205/57211/1718/2152/63910/120224/6713/9076/444/9235/5266/10053/6307/6934/9620/205/7045/5743/999/2036/1525/54541/8553/6566/4940/5033/5327/4312/3217/3606/23764/6676/7277/5916/435/3157/7263/3269/5792/684/9540/51141/100133941/23541/3887/3732/221035/6890/55286/837/22941/7022/840/4599/3437/162966/230/2872/3814/4600/3976…
REACTOME_METABOLISM_OF_VITAMINS_AND_COFACTORS	189	0.343873	1.36478	0.00744417	0.0308883	0.0197536	3342	tags=29%, list=18%, signal=24%	6513/5646/81693/5644/6385/6382/3949/57016/6947/93100/113278/375790/4907/5743/55034/79581/1208/1504/8876/8644/10840/54884/143/6697/26020/3417/440387/119391/53630/4522/5406/11330/2239/3320/6573/4363/51248/2817/54625/2356/55191/7804/9446/80308/27249/154807/337/10797/79717/80347/6472/10135/84875/128240
KEGG_PATHWAYS_IN_CANCER	325	0.323396	1.36703	0.002457	0.0149503	0.00956095	2067	tags=21%, list=11%, signal=19%	3914/6513/3918/4233/3909/7476/5468/23624/3675/112399/652/3728/2950/7039/3673/3655/2064/2122/1163/332/6934/7477/5743/999/595/6469/1855/4088/598/7481/4312/7855/80326/1869/1495/9618/5879/1021/5888/5898/5371/1956/5899/5595/650/7849/3845/1488/6923/841/10401/7422/8772/5970/8312/7170/64399/3065/898/2335/8030/5291/10342/330/7474/10928/3320/1017/2263
REACTOME_CELLULAR_RESPONSES_TO_STRESS	370	0.322082	1.37188	0.00514139	0.0238332	0.0152417	4200	tags=32%, list=22%, signal=26%	768/8091/3159/11065/30001/112399/2950/3303/3304/3397/2877/27242/84790/890/7295/84962/3315/2288/7277/3310/1869/1535/3337/1021/2146/55466/5721/4001/5696/5698/5720/6195/5595/3297/7979/1051/6923/7422/25824/162989/5970/5699/898/23043/10383/6667/3320/9531/343/1017/871/5719/55706/10808/25994/5686/5052/10963/79023/5606/10213/54205/829/7316/5707/9448/5684/5710/3576/8655/5706/5688/6921/5702/9688/6119/84516…
HOLLMANN_APOPTOSIS_VIA_CD40_DN	249	0.334862	1.37197	0.00501253	0.0233751	0.0149488	3794	tags=38%, list=20%, signal=31%	55630/6282/302/9123/706/7264/55655/928/1992/3217/3216/2628/10653/7504/7205/64108/1495/4065/965/28969/54913/26136/79071/29108/4258/5696/5698/5499/5720/64761/6132/5445/837/3206/839/840/8801/26063/25978/4615/23597/23333/4600/8531/6238/55608/10342/51700/9531/3959/79792/10617/871/64135/5092/6184/5236/64778/9943/6891/51734/8540/5530/27068/4521/9246/6259/8519/6772/9446/1371/3135/23314/6711/23549/9019/10…
WANG_LMO4_TARGETS_UP	335	0.324881	1.37228	0.00507614	0.023601	0.0150932	4677	tags=38%, list=25%, signal=29%	6513/150696/10551/58489/7033/25803/55359/22977/10276/50848/27346/25841/977/54541/95/6744/10529/84798/6856/481/116028/4151/6284/55771/157313/64105/65124/56731/6120/2013/11335/84231/7022/122416/84270/285489/90355/57486/10362/23333/7341/54675/3070/10890/10559/10928/666/84326/3176/191/8991/8273/9208/57222/10134/83862/58190/145282/54704/201254/56256/29950/1534/2746/203068/1622/54998/6711/83786/7468/81…
GROSS_HYPOXIA_VIA_ELK3_UP	199	0.344361	1.37401	0.0049505	0.0232718	0.0148827	3739	tags=35%, list=20%, signal=29%	11065/652/5339/6241/9133/113130/332/10112/55715/11282/891/595/84790/858/890/23204/84962/29127/3217/3280/55872/1058/1946/10403/79071/10615/9824/10207/9156/54820/6319/1841/55920/10401/23612/2872/10383/3070/80256/9538/22800/3959/1849/6737/6558/653808/6484/5606/9351/5361/2618/29901/993/3460/1622/7037/10628/9918/10280/441478/4296/23625/3911/10123/10411/4641/10955/9368/80381/23603
LINSLEY_MIR16_TARGETS	204	0.343902	1.37437	0.0025	0.0149503	0.00956095	4015	tags=33%, list=21%, signal=26%	54443/4008/638/11343/3304/2152/2069/144455/389/8795/80323/1869/79589/83596/1021/6548/283375/55054/5445/9986/29775/1111/11313/840/119392/55038/2872/57552/28987/898/7866/10712/6992/2043/2673/57403/79751/51068/11059/25923/993/8226/1965/222236/127933/26056/613/84458/9842/7023/162073/3984/7465/7779/56674/9191/10749/7335/127262/3726/143384/57169/9741/23608/6050/80146/129401
REACTOME_NEUTROPHIL_DEGRANULATION	475	0.317962	1.37441	0.00278552	0.0153879	0.00984082	3883	tags=34%, list=21%, signal=28%	6286/5645/4680/3958/5646/6282/978/26/221/10562/302/6590/51316/3934/116844/6317/3728/2950/6947/93100/3303/3304/1476/1604/64114/5329/5834/201294/5768/634/101/5328/5317/226/10555/8673/9961/823/976/54509/9725/1992/10312/4257/3310/8694/8876/1535/965/5315/684/5879/1729/4860/5284/240/29108/84418/353/3417/4069/1265/5663/11322/5478/8635/4831/4282/57153/10487/28956/230/7414/102/10383/10890/23218/2683/5269/…
LI_INDUCED_T_TO_NATURAL_KILLER_UP	299	0.329358	1.38086	0.0071599	0.0299753	0.0191697	2522	tags=27%, list=13%, signal=24%	11187/55630/55057/6277/3958/6282/8612/3099/6275/6281/302/822/706/57228/11202/84419/26031/6820/113278/1476/8870/2274/4907/6307/928/6696/84790/83442/8553/85014/153768/9961/54509/3656/54843/388564/5355/824/10227/10538/3157/1495/9260/4643/64834/6856/26136/2634/6284/1848/4000/382/377007/51097/23052/219285/79026/10581/415116/197259/201799/826/5269/10410/9531/3959/1632/8743/5359/1312/25907/12/8793/2817/…
REACTOME_DISORDERS_OF_TRANSMEMBRANE_TRANSPORTERS	176	0.353953	1.38447	0.004914	0.0231703	0.0148178	4357	tags=39%, list=23%, signal=30%	6513/55630/11254/54716/5002/6566/81031/1356/7355/23443/10568/5721/5696/2646/5698/5720/9056/7979/3098/213/55343/5699/10559/28234/5719/55706/5686/79023/10213/9843/10999/10613/7316/5707/5684/5710/5706/5688/5702/9688/5687/682/5685/6048/5713/5691/5704/5682/57122/6505/6575/11160/5690/1080/5714/8671/5692/129401/5709/26503/5715/55315/5695/5693/30061/10197/5708/79139
SANSOM_APC_TARGETS	197	0.348075	1.38566	0.00249377	0.0149503	0.00956095	3284	tags=30%, list=17%, signal=25%	5645/3816/113026/254531/9957/51330/53834/55040/155465/6662/3158/123036/64600/1846/23436/285973/1357/8876/51514/6659/154141/10635/10403/9780/83879/84958/440387/63036/55722/2049/286676/4324/2013/7135/284996/284403/7298/5407/84264/10606/89891/6558/10221/8323/960/84722/8379/126917/11140/8836/4610/6035/84057/10328/284110/57129/29968/5426/6472/8140
REACTOME_CELLULAR_RESPONSES_TO_EXTERNAL_STIMULI	465	0.320687	1.38722	0.00271739	0.0152015	0.00972164	4200	tags=31%, list=22%, signal=25%	768/8091/3159/11065/30001/112399/2950/92421/3303/3304/3397/2877/27242/4495/84790/890/7295/6714/84962/3315/2288/7277/285973/3310/1869/7416/4493/1535/3337/1021/2146/55466/5721/4001/5696/5698/128866/5720/6195/55054/5595/3297/7979/1051/6923/7422/4496/25978/28956/25824/162989/5970/5699/27243/898/23043/10383/6667/3320/9531/343/1017/871/5719/55706/10808/25994/5686/5052/10963/79023/5606/10213/54205/829/1…
DAVICIONI_MOLECULAR_ARMS_VS_ERMS_DN	177	0.356071	1.39268	0.00493827	0.0232378	0.0148609	2491	tags=30%, list=13%, signal=26%	55630/8091/1382/10644/4061/6382/90993/652/9322/7869/2064/79887/7264/64285/8821/26873/595/26504/6510/2050/976/7481/79581/1846/7205/1978/3226/3227/334/684/64762/26872/25987/1956/23246/2049/3206/7162/10938/2239/6238/80346/1849/3223/871/59307/2014/64778/51454/81621/57523/8626/2131
FOSTER_KDM1A_TARGETS_UP	243	0.341924	1.39334	0.00254453	0.0149503	0.00956095	1991	tags=20%, list=11%, signal=18%	5655/7138/1001/3816/200879/8537/7103/978/4061/51316/127534/79983/153769/5967/6820/6712/1562/57146/10553/148170/8538/1179/127294/3217/7504/1208/7263/7136/58495/154141/1573/9547/4258/80168/3417/84941/54502/63036/7162/5406/79101/4599/10581/3814/54682/80021/3959/23593
JISON_SICKLE_CELL_DISEASE_UP	178	0.355849	1.39419	0.00492611	0.0232039	0.0148393	3136	tags=32%, list=17%, signal=27%	8638/306/4061/302/133/22885/10643/6713/1192/10553/928/977/54498/645/7295/8673/7504/7205/684/481/3693/2634/5721/8942/4001/5696/10226/5698/6890/6888/2787/840/9517/3430/4599/3437/2335/4664/10561/9537/2014/5052/1890/10440/1649/5106/4794/5684/9246/6772/9446/811/7168/10063/5747/9034/5034
PLASARI_TGFB1_TARGETS_10HR_UP	193	0.350486	1.39585	0.00246914	0.0149503	0.00956095	2783	tags=32%, list=15%, signal=27%	2810/6513/2707/3099/2317/259173/3775/55971/10848/2706/2591/51330/11343/5329/8870/2150/2069/56937/8061/8482/5743/5317/8553/23508/4909/7481/445/2628/23764/6574/9547/23645/152519/5366/6364/26030/23012/84879/1848/29775/64900/7422/10272/284996/23052/182/3976/84102/5744/56034/9208/4642/4982/861/27230/6478/7804/157285/9592/10625/3624
GROSS_HYPOXIA_VIA_ELK3_DN	151	0.364805	1.40251	0.0117647	0.0433789	0.0277415	2925	tags=30%, list=15%, signal=26%	6513/10170/4071/6590/30001/133/23657/3655/7264/55785/5743/7050/54498/8553/26298/3219/1846/6574/9314/8915/2023/4939/23645/29923/79602/112464/1051/7422/9991/25824/6303/182/415116/27289/25994/8793/960/23327/1316/7378/6478/6372/54206/56892/290/10797
GROSS_HYPOXIA_VIA_ELK3_AND_HIF1A_DN	99	0.392732	1.4037	0.0140187	0.0493137	0.0315369	4073	tags=41%, list=22%, signal=33%	11065/652/5339/6241/375790/11282/891/595/3217/3606/64834/79071/9156/151648/55920/3959/1849/6737/27101/391059/5361/2618/29901/993/3460/10628/10280/441478/6498/4296/22928/10123/10411/7084/9368/80381/7841/10645/2114/3838/483
PAL_PRMT5_TARGETS_UP	191	0.354316	1.40782	0.00247525	0.0149503	0.00956095	4218	tags=39%, list=22%, signal=31%	4233/4288/822/991/1894/9133/1164/1163/7045/3832/29128/29127/2288/9768/4173/7272/9212/995/4860/4171/5099/9319/54820/112464/10460/3619/7298/54108/3654/3070/8502/10477/6626/10559/191/2014/3148/51642/5796/27166/4830/27068/6240/7884/8904/1892/5427/81892/54998/5702/51602/5558/51053/10428/7284/7112/10541/7529/2079/56474/10169/79042/55656/328/1891/6418/5921/3191/5985/9789/129401/3838/5935/5693/10631
DAZARD_RESPONSE_TO_UV_SCC_DN	112	0.384365	1.40885	0.0117096	0.0432782	0.0276772	4776	tags=38%, list=25%, signal=29%	8091/3397/8853/3833/7050/6790/54541/1846/9748/9618/1058/6659/136/8653/841/8772/5373/10904/23327/8626/2131/23212/6478/3566/2295/2535/23613/7465/3156/51491/7132/10123/1870/25976/7705/9798/10458/25983/6477/10557/27161/22992/4140
REACTOME_SLC_TRANSPORTER_DISORDERS	99	0.394406	1.40969	0.0116822	0.0432113	0.0276344	2451	tags=22%, list=13%, signal=19%	6513/55630/11254/54716/5002/6566/81031/1356/7355/23443/10568/2646/9056/3098/213/55343/10559/28234/55706/79023/9843/10999
DAIRKEE_CANCER_PRONE_RESPONSE_BPA_E2	115	0.382633	1.41094	0.0137931	0.0486668	0.0311232	4189	tags=43%, list=22%, signal=34%	7138/6275/3159/6241/3706/9088/7295/2597/2628/5355/1978/79041/334/7086/5437/4600/2011/580/10036/3148/518/79885/7388/7125/6159/1981/4176/10969/2091/1176/1965/5687/7168/1968/5425/10541/9588/25873/51491/3183/7867/5690/10212/29927/5985/1351/5520/4722/8073/1503
REACTOME_PTEN_REGULATION	138	0.371943	1.4134	0.00945626	0.0369079	0.0236032	5370	tags=53%, list=28%, signal=38%	5468/2122/23186/2146/5721/5696/5698/5720/5371/5595/7979/28956/5699/3065/5719/5686/10213/7316/5707/5684/23028/5710/2444/5706/5688/54815/5702/5687/1457/5685/5978/5713/5691/5704/6009/5682/1460/6591/51564/10542/5690/5714/5692/23608/5709/4343/5715/5695/5693/207/57504/10197/11060/5708/1459/5717/27161/9219/9491/8535/84232/10273/5700/5701/8726/5683/55004/5931/64223/6233/9861/8649/23198
ALCALAY_AML_BY_NPM1_LOCALIZATION_DN	181	0.359464	1.41391	0.00245098	0.0149503	0.00956095	1743	tags=30%, list=9%, signal=27%	7850/11065/22974/4288/991/7083/2305/6241/9787/9133/8821/7464/8842/1163/332/3833/891/54997/3241/4883/890/24137/645/9232/11004/990/3161/2059/55601/9249/9185/4173/995/23397/4171/1033/4085/8942/55388/3561/5366/9156/10223/899/1841/79019/1111/4522/79801/7422/284403/7298/23052/10581
MILI_PSEUDOPODIA_CHEMOTAXIS_DN	415	0.329907	1.41499	0.00269542	0.0151593	0.00969462	4396	tags=37%, list=23%, signal=29%	10232/3783/6513/2317/1893/3675/4061/3949/30001/4320/57016/7869/5097/2152/55240/5768/1192/928/7050/8744/2050/6566/4323/5033/5327/81031/10227/6574/3321/3157/8694/1495/7355/334/136/5792/64834/23529/1729/780/6717/6319/51274/3297/86/135228/7162/57153/57217/8828/22904/57552/7414/51635/2335/23353/6238/415116/6573/4350/476/1605/8165/25921/5447/4363/8273/93185/84804/6184/2923/79709/23654/10134/51144/6891/…
GENTILE_UV_HIGH_DOSE_DN	278	0.341163	1.41525	0.00484262	0.0228568	0.0146173	3495	tags=28%, list=19%, signal=24%	4233/22943/5646/8091/4071/9322/3655/10643/3397/444/1164/891/6790/9636/54541/8553/990/2063/4088/2059/8412/1058/9837/5366/382/6923/841/7764/10733/10272/6303/90355/9685/8772/2000/11235/1022/8502/5597/22800/1849/5420/1337/10904/3148/5580/6809/7374/571/1649/7884/6675/861/8766/2297/6236/6478/390/5427/3566/3460/8226/26471/23314/26585/2535/3589/4690/4314/23613/5747/4729/7465/51491/2355/7132/5861/4800/101…
GAL_LEUKEMIC_STEM_CELL_DN	227	0.348984	1.41735	0.0025	0.0149503	0.00956095	2007	tags=26%, list=11%, signal=24%	6286/6337/771/3958/3557/5653/822/991/5347/7153/983/250/6241/9133/332/10112/699/51203/3833/891/9833/55143/146909/890/11130/79695/990/55723/64151/3161/701/9768/1869/1058/9700/8318/995/10840/5888/1033/7167/4001/4069/51512/79733/79019/1174/11313/213/79801/51659/7298/79728/1472/9480/7421/8507/1953/64598/3176
POOLA_INVASIVE_BREAST_CANCER_DN	128	0.381833	1.4237	0.00968523	0.0375192	0.0239942	1328	tags=22%, list=7%, signal=20%	3914/5655/3872/771/3960/1728/2317/6385/80162/54961/8821/10406/2069/9620/977/54997/5317/3158/7984/4488/5327/3852/563/684/51312/8190/3854/79789
REACTOME_BIOLOGICAL_OXIDATIONS	218	0.352617	1.42418	0.00501253	0.0233751	0.0149488	2518	tags=23%, list=13%, signal=20%	29785/6819/26/54575/27284/218/2950/22977/6820/1562/1577/26873/57834/66002/54498/95/6783/23491/4257/124975/13/1573/7364/91703/4258/54658/134147/80777/373156/8824/119391/196/10380/55902/4051/1591/1555/79094/191/54905/5447/1312/4259/347734/2937/54578/1592/79017/1595/1559
REACTOME_HIV_LIFE_CYCLE	151	0.37139	1.42782	0.00470588	0.022347	0.0142912	5267	tags=43%, list=28%, signal=31%	3159/92421/79720/1104/128866/5437/5478/6923/25978/27243/1022/7469/93343/55706/7251/2961/79023/10015/4331/8815/2963/6881/23327/2237/7316/5901/6749/6921/51510/9688/7520/51652/51160/5905/5441/6874/5902/7936/57122/55048/5439/2959/5440/8812/25920/6917/9525/129401/51271/7514/3978/81929/6829/8148/11198/6880/2967/22916/6883/8480/2958/6396/5438/27183/6233
REACTOME_METABOLISM_OF_AMINO_ACIDS_AND_DERIVATIVES	361	0.339079	1.43667	0.0025974	0.0149503	0.00956095	4435	tags=38%, list=23%, signal=30%	347735/1728/50506/23474/6535/389434/54498/6192/445/2628/84706/435/7263/5831/1468/23446/4357/5721/8942/5696/100131187/5698/162417/26227/548596/5720/6132/1159/2875/116832/7979/57571/58472/6303/5699/883/6611/65263/3176/191/5719/51582/26275/5686/5092/6187/57407/6223/10213/200916/51065/6227/125061/53905/6159/5707/6158/5625/5684/5710/2746/5706/6173/1743/5688/5702/6229/586/5687/256987/5685/6157/6141/618…
KEGG_PARKINSONS_DISEASE	112	0.391969	1.43672	0.00936768	0.0365928	0.0234017	5346	tags=54%, list=28%, signal=39%	125965/7416/7417/4709/9377/4697/509/1537/1329/1340/1337/1345/518/4715/7388/54205/4710/7384/9246/27089/1349/4725/4716/514/4706/7385/292/4729/4728/4720/1327/4704/6391/6389/6392/513/517/4717/1351/4694/4722/10476/7317/4705/4723/4713/4726/6390/1350/9167/7318/29796/836/4695/539/516/4719/4711/440567/4700/506
CHICAS_RB1_TARGETS_GROWING	240	0.352164	1.43757	0.00251256	0.0149503	0.00956095	3233	tags=37%, list=17%, signal=31%	771/55107/306/128239/22974/991/7153/1063/2305/4751/57211/1718/259266/9133/7430/27346/10112/699/51203/891/55143/890/54541/24137/9928/3613/3161/29128/3486/57082/8492/701/9768/4173/1978/7272/55635/1058/10635/9837/2146/4171/83879/1033/5099/9111/26227/6319/51512/64105/4000/839/139886/51659/54892/10098/10535/3070/10051/5836/5984/222663/27101/151246/5932/994/5106/3418/79718/8476/4176/8833/3251/5427/7902…
WOOD_EBV_EBNA1_TARGETS_UP	108	0.395515	1.43999	0.00915332	0.0360486	0.0230536	3644	tags=42%, list=19%, signal=34%	6275/1728/28231/218/3303/3304/64699/10626/3177/445/3336/3226/3337/8644/6652/3329/2013/7022/3628/8549/8030/4664/10477/10651/9531/3959/3223/5420/871/518/8540/960/1798/1981/6772/10787/2535/8175/7301/9582/1509/5725/9330/23596/10417
GOZGIT_ESR1_TARGETS_UP	142	0.380327	1.44439	0.007109	0.0299311	0.0191415	1277	tags=24%, list=7%, signal=22%	150696/6707/5468/51703/7498/1893/221/7020/653145/135932/9121/250/254439/10643/92840/2274/444/4907/51442/6934/3861/1824/3852/10312/3486/3606/29841/5460/7368/55635/240/6717/51312/8702
SHEPARD_CRUSH_AND_BURN_MUTANT_UP	200	0.363233	1.44929	0.00248139	0.0149503	0.00956095	4158	tags=36%, list=22%, signal=29%	3872/7262/1364/118932/10053/205/5743/10140/10809/1846/3280/3692/64834/122704/23246/650/10039/1051/8635/841/6303/29789/9136/2872/102/2335/54675/25996/1591/3320/400916/1953/90007/131076/871/901/25994/24140/7873/51065/3484/1592/51388/8882/1595/9241/54433/23212/9804/2091/56892/114049/10628/9093/10328/93974/55168/51042/84916/55110/55319/3726/6182/581/1491/3614/388962/9605/1263/29093/92856/114971/23438
ENK_UV_RESPONSE_KERATINOCYTE_DN	473	0.335442	1.44979	0.00277778	0.0153879	0.00984082	5531	tags=44%, list=29%, signal=32%	6513/22943/11065/22974/7153/10643/3397/6713/6307/23607/1525/8553/11130/6566/2222/2597/8412/51304/1846/5058/3280/5757/9249/9414/2195/3321/3336/5584/1495/965/6856/3693/6717/5638/3329/5099/4085/26872/9319/9111/80777/86/3845/11335/8653/6672/5074/4522/7525/4496/23779/7298/955/6637/8030/6788/7341/330/4179/7474/6780/10561/10559/10606/1017/901/9231/6636/5744/10512/2181/51582/5359/5932/11222/2963/8323/860…
KAN_RESPONSE_TO_ARSENIC_TRIOXIDE	121	0.390317	1.4506	0.00697674	0.0295799	0.0189168	2655	tags=36%, list=14%, signal=31%	22943/3949/133/57016/23657/7153/3303/6241/3304/9787/10643/4495/1948/10112/10626/205/9518/858/54541/3310/4493/23231/8644/9547/29113/4001/23645/26227/6319/23246/54478/26355/4496/182/57761/131566/5420/5744/25907/1649/1981/3638/4176/3576
REACTOME_RNA_POLYMERASE_II_PRE_TRANSCRIPTION_EVENTS	84	0.417858	1.45193	0.0139211	0.0490443	0.0313647	6226	tags=46%, list=33%, signal=31%	5437/6923/1022/7469/2961/4331/2963/6881/6749/6921/5441/6874/7936/5439/2959/5440/8812/79577/25920/6917/55677/6829/8148/11198/6880/2967/22916/6883/2958/5438/2068/123169/51497/5432/6873/2965/5434/6879/5436
REACTOME_PHASE_II_CONJUGATION_OF_COMPOUNDS	107	0.400712	1.45426	0.00689655	0.0293465	0.0187676	3358	tags=27%, list=18%, signal=22%	6819/54575/27284/2950/6820/26873/6783/4257/124975/7364/4258/54658/373156/119391/10380/79094/191/1312/4259/347734/2937/54578/79017/9446/79799/51504/2938/2939/27430
REACTOME_COPI_DEPENDENT_GOLGI_TO_ER_RETROGRADE_TRAFFIC	98	0.406936	1.45506	0.00923788	0.0362373	0.0231744	4072	tags=44%, list=22%, signal=35%	10112/3833/84790/146909/24137/11004/3832/29127/1062/7277/11015/23303/81930/56992/90990/9585/10383/11014/3835/23423/10945/378/375/22820/54732/10959/8774/81876/9183/22818/10749/79861/10972/5861/26958/1315/89953/26286/381/10381/55083/372/51014
REACTOME_C_TYPE_LECTIN_RECEPTORS_CLRS	140	0.384684	1.45687	0.00719424	0.0300921	0.0192444	4356	tags=45%, list=23%, signal=35%	4586/4582/140453/4585/94025/3710/200958/727897/84433/6714/4584/5058/394263/8915/29108/5721/5696/5698/5720/3845/7979/841/56667/5970/5699/10071/5719/5686/5580/4791/5971/10213/5530/997/7316/5707/5684/5710/5706/5688/5702/5687/4893/5685/5713/5691/5704/5682/7335/5690/5714/5534/5692/5709/7189/5715/5062/3265/5695/5693/10197/9040/5708
HINATA_NFKB_TARGETS_KERATINOCYTE_UP	84	0.419774	1.45859	0.00928074	0.0363749	0.0232623	2999	tags=39%, list=16%, signal=33%	3855/3694/1001/6699/3557/1942/10406/9235/5328/928/3861/4323/5327/4312/5879/7127/6890/6364/1956/650/7422/5970/2335/7474/5606/3576/390/9446/6372/10318/6373/5055/3659
ALONSO_METASTASIS_UP	189	0.368322	1.46181	0.00248139	0.0149503	0.00956095	3853	tags=38%, list=20%, signal=30%	768/54443/6281/1829/2266/11145/1163/205/6461/3832/3161/7277/7416/334/2023/9540/6717/8428/6319/4831/9689/25824/10581/4709/29088/8507/1603/10606/1537/1340/2181/196527/12/746/51253/3484/22948/8667/51142/118487/25923/5901/25879/6921/27249/8836/92689/7520/79154/4706/8491/132/7465/56674/28972/56945/689/54499/51728/5861/328/55970/1026/6392/55651/10542/6165/6418/10381/3685/5507
ZHU_CMV_ALL_UP	105	0.403278	1.46256	0.00921659	0.0361842	0.0231404	3514	tags=42%, list=19%, signal=34%	3429/3303/1604/5743/5214/9636/7277/3336/2023/4860/4939/5696/9144/2537/6890/5371/27338/2013/6672/4599/4600/2011/6737/10963/7873/54704/211/5684/8519/9688/5687/3589/3659/6627/1434/5902/4869/26003/10135/8140/80273/5321/23516/2959
SCHAEFFER_PROSTATE_DEVELOPMENT_6HR_DN	440	0.339029	1.46274	0.00268097	0.015151	0.00968933	4899	tags=40%, list=26%, signal=30%	3880/58489/3856/129642/3775/652/79098/1366/4072/3397/6662/10755/23607/4188/55450/6624/1179/598/3209/29128/222/9249/9414/283638/2288/7379/23186/157638/5315/58516/481/83596/3693/85456/9601/5202/6697/10226/5499/1265/144717/5531/51274/80320/3845/2820/840/51107/9689/389792/55571/51474/140609/79026/8284/10362/9181/92799/8502/5818/11014/4697/23286/1849/51094/1017/54985/14/6636/29946/8887/57222/51726/425…
REACTOME_SIGNALING_BY_RHO_GTPASES	391	0.342984	1.46307	0.00261097	0.0150098	0.00959904	3553	tags=36%, list=19%, signal=30%	2810/128239/29984/79784/85415/171177/991/9322/5347/25791/1063/1894/10276/201176/9743/27237/332/699/9055/999/84790/55143/7534/11130/7984/11004/9928/6714/1855/2017/103910/54509/79682/29127/389/5058/1062/57082/701/7277/1495/83540/81624/147841/1535/1058/55789/9212/1072/10403/81930/5879/1729/995/10811/9824/4085/11113/54820/64105/94134/5595/79019/84904/23092/151648/55920/128272/60/5590/23779/3619/10094…
RIGGINS_TAMOXIFEN_RESISTANCE_DN	218	0.363577	1.46844	0.00250627	0.0149503	0.00956095	2665	tags=29%, list=14%, signal=25%	7031/4582/6337/1001/3429/54575/306/4071/26509/1829/8754/8821/6662/55240/9914/9603/9636/5920/55601/563/2195/3157/9314/10529/114908/23443/51141/9111/5366/2537/54502/94134/5782/6526/29775/51097/213/677/7764/10581/54477/102/10098/4664/284266/10410/8507/3959/5836/64135/10512/8743/55236/55353/1832/12/8573/51454/9633/7884/9246/5104/6772
STARK_PREFRONTAL_CORTEX_22Q11_DELETION_DN	500	0.337654	1.46873	0.0027027	0.0151637	0.00969745	5245	tags=48%, list=28%, signal=35%	6277/132299/83451/444/9168/127281/7295/5058/3336/7263/3692/51527/65078/4597/84418/7167/5202/2987/93109/3417/5499/128866/6132/55505/2013/11335/4831/6923/7417/26355/28956/3619/653784/84817/7341/51629/29088/6780/116984/2224/140823/666/509/84264/84326/84908/1537/5634/54985/1329/9551/51573/26275/27101/6183/5686/1312/4259/5052/10963/10213/873/4710/10134/11222/200916/65003/1207/286827/10440/23042/63875/…
KEGG_TIGHT_JUNCTION	131	0.389795	1.47064	0.00700935	0.0296373	0.0189536	3096	tags=33%, list=16%, signal=28%	51208/1364/27134/57530/79784/1366/84612/50848/6237/9076/10627/2036/137075/6714/2017/81/103910/92359/9414/5584/1495/100506658/10207/3845/60/5590/7525/56288/8531/22800/3993/7082/5580/8573/64398/9071/5522/60412/1457/4893/71/87/23562
YAO_TEMPORAL_RESPONSE_TO_PROGESTERONE_CLUSTER_12	75	0.42671	1.47433	0.0132159	0.0475233	0.0303919	2888	tags=39%, list=15%, signal=33%	6282/57016/6237/1164/2222/4192/118429/79071/3417/5720/373156/841/55699/826/3959/10552/191/2014/50814/286827/960/3418/9545/54982/56994/51614/8836/6119/60412
EPPERT_PROGENITOR	134	0.391136	1.47886	0.00472813	0.022407	0.0143297	4189	tags=44%, list=22%, signal=35%	10276/9133/55240/2069/27346/11130/79682/29127/7504/9768/51514/10403/1021/6652/29766/9319/6319/55215/1111/10733/51659/90355/56889/23043/9735/1022/3320/10606/55706/11001/27102/6296/6240/5707/118987/5427/7037/1965/9793/23576/1457/10797/84079/7168/813/9645/56259/10128/9669/8898/9124/4285/58488/11200/9790/3416/166647/1737/1503
LINDGREN_BLADDER_CANCER_CLUSTER_3_DN	222	0.36561	1.47952	0.00248139	0.0149503	0.00956095	3810	tags=32%, list=20%, signal=26%	3914/3872/3898/10551/10509/1294/3673/2051/10205/57211/2122/2877/4907/595/54997/3861/84962/4088/388610/54947/54843/7205/4091/24139/2987/4862/25878/1265/5371/837/64795/25824/5829/1606/8906/79026/182/1022/1591/3176/9855/26275/2108/6809/11047/1512/960/83862/2131/122786/390/9446/2746/414/55127/84269/79990/1781/4869/64745/219699/3476/84795/6591/689/6166/7084/23362/5791/3267/55020/10253
DARWICHE_PAPILLOMA_RISK_HIGH_UP	135	0.392305	1.48093	0.0047619	0.0225442	0.0144174	3816	tags=37%, list=20%, signal=30%	2810/6282/11065/4061/6590/5653/6317/7039/3939/3397/10406/56937/7295/8986/29127/137797/5230/2023/8801/9689/26355/182/23597/23353/3976/10410/1329/27101/5480/7161/56994/9141/1475/8655/4691/387695/129607/637/7186/58191/79095/55168/2584/6170/1119/64215/55651/10575/5211/29101
DOANE_RESPONSE_TO_ANDROGEN_UP	173	0.380476	1.48336	0.002457	0.0149503	0.00956095	3407	tags=34%, list=18%, signal=28%	6286/9052/2525/3958/79838/2317/8437/79098/2528/7113/3291/7264/5834/55974/66002/57804/79778/563/2762/23541/6652/25987/55567/10223/6319/3206/23092/55711/23052/79026/6788/6238/284266/23286/191/27289/4681/10808/4363/10221/8690/5304/23327/6296/59338/26047/23144/811/6715/256987/55161/5550/7163/10788/4604/23242/30/9645/4598
REACTOME_HIV_INFECTION	233	0.362961	1.48414	0.00246914	0.0149503	0.00956095	4987	tags=47%, list=26%, signal=35%	3159/92421/130340/10053/79720/1104/5879/5721/5696/5698/128866/5720/5437/7979/1174/5478/6923/25978/5699/27243/1022/7469/93343/5719/55706/7251/2961/5686/79023/10213/10015/4331/8815/2963/6881/23327/2237/7316/5707/5684/375/5710/5901/5706/5688/6749/6921/51510/5702/9688/7520/5687/51652/51160/5905/5685/5441/6874/292/5902/5713/4869/7936/1175/5691/5704/567/5682/57122/55048/5439/2959/163/5690/5440/8812/571…
LAIHO_COLORECTAL_CANCER_SERRATED_UP	111	0.407055	1.48936	0.00699301	0.0295951	0.0189265	3450	tags=34%, list=18%, signal=28%	4680/3429/302/4071/9245/5357/103910/8407/55601/481/55505/29095/25978/9685/102/57162/1603/509/6635/29097/2014/56034/8826/5480/10133/829/4738/5710/10109/3956/10130/308/4729/567/10169/5321/3183/6166
DITTMER_PTHLH_TARGETS_DN	69	0.439128	1.48981	0.0136054	0.048041	0.030723	3981	tags=41%, list=21%, signal=32%	3655/4495/2195/55625/5267/81855/4000/9517/4496/3814/4709/5597/22800/3320/11014/9208/1981/10109/10625/71/5425/5747/10917/501/8451/24145/3306/5692
IGARASHI_ATF4_TARGETS_DN	97	0.41552	1.49095	0.00680272	0.0292404	0.0186997	2720	tags=34%, list=14%, signal=29%	6286/4680/10551/222171/79983/5002/3303/1829/3304/2877/444/1040/9314/10529/8644/283/4001/26227/10447/283209/8801/5819/160335/166929/4664/22906/10552/8323/5106/8693/2444/9804/10787
IZADPANAH_STEM_CELL_ADIPOSE_VS_BONE_UP	126	0.399748	1.49285	0.00712589	0.0299311	0.0191415	2009	tags=28%, list=11%, signal=25%	7262/8091/1728/51703/7020/23657/84419/2122/4495/8061/3241/1992/5327/10312/65108/2762/10265/136/9540/8942/5696/5698/3206/1848/4000/9989/7422/9991/5699/182/51635/10098/3207/64968/10606
KIM_WT1_TARGETS_12HR_UP	164	0.383987	1.49312	0.00238663	0.0149503	0.00956095	1317	tags=23%, list=7%, signal=21%	771/4071/90993/3775/133/8045/79098/3303/26509/3304/9787/64699/6662/5328/55715/374/9518/54541/4088/5033/2059/5327/578/55366/7277/6574/3310/79720/55357/3337/780/481/3693/9289/9547/30850/3556
PUIFFE_INVASION_INHIBITED_BY_ASCITES_UP	75	0.432362	1.49386	0.0110132	0.0416517	0.026637	2849	tags=32%, list=15%, signal=27%	4680/22974/57016/5339/55355/2152/10112/55143/598/1058/51192/5230/2023/8644/7086/10226/7298/23353/55379/10963/1981/2618/6478/2935
MCBRYAN_PUBERTAL_TGFB1_TARGETS_UP	160	0.384428	1.4939	0.00234742	0.0149503	0.00956095	2667	tags=31%, list=14%, signal=27%	5268/6513/6277/3875/1893/822/6768/2591/10276/2152/8870/6662/1192/634/148170/7050/8553/4323/5327/3280/9414/7277/65108/1356/334/1785/51278/3098/10401/7422/7052/10487/10938/182/102/2335/7474/476/1537/56034/50486/1312/5796/3069/8323/3169/3927/861/1534/6478
PEART_HDAC_PROLIFERATION_CLUSTER_DN	74	0.434792	1.49397	0.0112613	0.0423249	0.0270675	2879	tags=30%, list=15%, signal=25%	6282/3159/11065/5347/9133/6790/11130/8780/684/3561/1841/4831/10733/9735/7866/2014/4176/3576/8519/5901/5427/586
YANG_BCL3_TARGETS_UP	321	0.354552	1.49409	0.00245098	0.0149503	0.00956095	1635	tags=24%, list=9%, signal=22%	3855/7138/27111/8638/4070/11065/4288/6382/129642/440335/28/51599/991/7153/2305/3664/983/1894/6241/1604/9787/728113/84808/89958/27242/25825/10112/699/51203/9055/891/7045/9572/81610/6790/2635/890/9232/11004/8744/1992/5327/92359/29127/2628/29089/64108/55872/1869/1356/51192/9700/10635/9212/51129/79071/2634/9824/83461/5696/9111/5698/157313/6890/6319/1159/54502/54478/3665/10460/9585/10733/90417/4322/34…
NGUYEN_NOTCH1_TARGETS_DN	80	0.430977	1.49624	0.00917431	0.0360486	0.0230536	2980	tags=30%, list=16%, signal=25%	688/7020/1294/3673/10276/2152/1192/5743/3241/445/6574/9314/4643/5099/5698/6120/871/6558/2043/8626/2131/27230/10797/10105
KESHELAVA_MULTIPLE_DRUG_RESISTANCE	75	0.43312	1.49647	0.0110132	0.0416517	0.026637	4226	tags=44%, list=22%, signal=34%	7103/977/645/3315/8751/57707/2987/51657/5531/373156/837/28956/22904/3065/2335/8507/54535/5744/8826/80178/10134/51734/35/79169/3077/10972/55110/984/58488/10611/55916/5192/10165
NIKOLSKY_BREAST_CANCER_20Q12_Q13_AMPLICON	143	0.396081	1.50162	0.00484262	0.0228568	0.0146173	3778	tags=34%, list=20%, signal=28%	5753/8537/4923/28231/6385/6590/116154/84612/63910/79144/5266/56937/6790/79444/6725/140700/51012/140893/85441/387521/56731/1051/55257/7022/7764/128414/1591/9885/55959/11047/57403/6227/7165/8813/5688/79025/10953/5203/23613/514/6874/7529/10139/7335/3911/54994/11317/11054/81928
REACTOME_PCP_CE_PATHWAY	92	0.422731	1.50368	0.00684932	0.0292522	0.0187072	4945	tags=58%, list=26%, signal=43%	1212/1855/7481/7855/23513/5879/5721/57154/5696/5698/5720/7979/5699/7474/5719/5686/10213/8323/7316/5707/5684/6259/5710/5706/5688/5702/5687/2535/5685/5713/1175/5691/5704/5682/387/163/5690/5714/5692/5709/5715/1211/5695/5693/10197/5708/5717/1173/9491/5216/5700/5701/160
REACTOME_PROTEIN_LOCALIZATION	160	0.388193	1.50853	0.00234742	0.0149503	0.00956095	6005	tags=61%, list=32%, signal=42%	7416/3329/3417/373156/197257/26063/5194/122970/6804/10651/400916/1537/23480/51287/388753/91452/11001/2671/10440/8540/55825/10452/7316/51142/27230/9804/1962/84269/100287932/8799/10245/51608/10063/54927/8266/4580/51025/84896/6901/30/6342/80273/8443/26521/1891/3155/56993/390916/26520/83752/9218/5828/3416/10005/5192/54469/10165/219743/224/79145/8310/92609/5195/131118/5264/90639/56942/27235/131474/342…
PID_E2F_PATHWAY	73	0.439545	1.50898	0.00904977	0.0359221	0.0229728	3131	tags=34%, list=17%, signal=29%	7083/983/6241/4605/5328/890/144455/990/23491/1869/8824/840/7298/3065/898/10419/6667/1017/5932/6240/7161/993/1029/4998/5902
DARWICHE_SQUAMOUS_CELL_CARCINOMA_UP	134	0.399183	1.50929	0.00472813	0.022407	0.0143297	2825	tags=31%, list=15%, signal=27%	6282/11065/4061/6590/51316/5653/7039/3939/3397/10406/56937/6696/7295/8986/824/137797/5230/2023/11261/4069/8801/51255/10435/9689/26355/182/23597/23353/3976/10410/1329/27101/5480/7161/56994/9141/1475/8655/4691/387695/129607/637
SENESE_HDAC2_TARGETS_UP	110	0.416406	1.51254	0.00470588	0.022347	0.0142912	3490	tags=39%, list=18%, signal=32%	8091/3159/5339/6947/3655/444/5328/6566/8795/118429/4173/13/6744/8942/3297/5782/51107/760/80149/10733/7052/5829/3814/57552/23333/4664/201562/50486/8826/10440/4982/8773/3576/7037/5756/3624/6157/7042/3552/10135/5868/5725/23516
PETROVA_ENDOTHELIUM_LYMPHATIC_VS_BLOOD_DN	162	0.390154	1.51511	0.00235294	0.0149503	0.00956095	1141	tags=23%, list=6%, signal=22%	3855/113146/3918/22943/4070/3429/306/822/5097/1366/10643/57211/375790/2122/8870/6237/2274/27242/9235/5328/6535/7045/9636/9961/4088/4323/2059/4312/283638/4493/4065/4017/9540/481/3693/2634/6652
AGUIRRE_PANCREATIC_CANCER_COPY_NUMBER_UP	290	0.363609	1.51572	0.00243309	0.0149503	0.00956095	5402	tags=52%, list=29%, signal=37%	55630/10848/652/55040/9787/7264/3397/1577/26873/6510/79778/79581/8780/51337/435/8694/23513/24139/51012/6856/143/57154/81858/312/10298/26030/5445/55722/7979/4831/3972/29924/55030/51032/55379/80221/10856/79792/28998/11169/10552/1537/9885/10095/79143/6183/7975/10945/4793/30846/4830/394/3661/6227/126208/8379/7165/25865/29894/5245/58533/8985/2997/5688/51236/6633/23144/51160/29888/1029/6141/514/5747/68…
LIEN_BREAST_CARCINOMA_METAPLASTIC_VS_DUCTAL_UP	80	0.436882	1.51674	0.00917431	0.0360486	0.0230536	2969	tags=41%, list=16%, signal=35%	55612/7850/10644/1947/27284/133/51330/10643/56938/64714/55214/9928/3269/136/51129/650/1051/8531/1404/50486/25907/79709/7378/4982/2296/646962/6274/5351/2297/3576/586/6715/813
JI_RESPONSE_TO_FSH_UP	65	0.451647	1.51736	0.0135135	0.0479704	0.0306779	3301	tags=40%, list=17%, signal=33%	6713/10682/9636/5920/2222/5493/2017/8644/4597/5698/839/11161/3430/4664/2224/901/873/521/9122/1595/79090/35/8519/7108/3156/22978
PID_ERBB1_DOWNSTREAM_PATHWAY	105	0.41839	1.51737	0.00230415	0.0149503	0.00956095	4384	tags=44%, list=23%, signal=34%	2810/7534/6714/598/2059/8986/824/81624/5879/9610/6548/5898/1956/5595/3845/1848/5590/10094/5291/10095/8826/5580/378/1950/10092/8976/6772/10109/10787/572/10006/4893/10096/7529/5868/10093/9712/7410/998/5520/3265/10097/7532/207/5518/10458
MARKEY_RB1_CHRONIC_LOF_UP	110	0.417803	1.51762	0.00235294	0.0149503	0.00956095	2611	tags=33%, list=14%, signal=28%	3783/6382/125965/7153/7083/3304/55355/728113/6713/374/6510/2222/29128/9748/2628/54810/9314/23397/79071/2146/4171/83879/10447/5371/1396/55038/4664/3207/5111/11169/1017/6484/3418/7884/1595/4176
GROSS_HYPOXIA_VIA_ELK3_AND_HIF1A_UP	141	0.402218	1.52214	0.00479616	0.0226834	0.0145064	3109	tags=34%, list=16%, signal=29%	9052/6513/3099/6385/302/4071/205/7050/54498/4084/5033/1846/23186/9314/5230/51129/8915/51141/22822/4041/7167/29923/112464/26355/7422/79660/25824/6303/182/415116/5597/6573/7511/27289/8991/25994/8793/960/23327/394/1316/122786/6478/54206/56892/10939/64856/7965
SU_TESTIS	79	0.439611	1.52342	0.00683371	0.0292522	0.0187072	2123	tags=20%, list=11%, signal=18%	983/4751/9133/699/891/6790/11004/3161/701/7272/23397/2146/1033/116832/11339/5984
SHEPARD_CRUSH_AND_BURN_MUTANT_DN	190	0.383358	1.5237	0.00247525	0.0149503	0.00956095	1988	tags=27%, list=11%, signal=24%	3159/54443/22974/4288/55165/991/7083/2305/983/1894/9787/259266/9133/1164/11166/332/9055/891/9833/11004/9928/3832/4088/4192/29127/7855/57082/701/7272/9212/83461/55771/157313/54820/55502/51512/6491/94134/7546/648791/57153/79801/10460/10733/84823/182/4709/6242/6664/11339/476
REACTOME_O_LINKED_GLYCOSYLATION	111	0.416914	1.52543	0.002331	0.0149503	0.00956095	2034	tags=27%, list=11%, signal=24%	4586/4582/140453/4585/94025/10331/11227/93010/9245/192134/2591/11226/200958/339366/727897/79695/51809/4584/84002/394263/79623/10164/9334/56667/55568/56913/81792/6482/1605/10071
TOOKER_GEMCITABINE_RESISTANCE_UP	80	0.439652	1.52635	0.00688073	0.0293465	0.0187676	4034	tags=46%, list=21%, signal=37%	3958/51703/652/6934/9636/645/445/64834/301/7167/2537/5445/112464/6628/6303/51635/1825/6737/23423/63875/6240/26574/6158/3704/1371/7520/10953/54663/7965/100288413/2495/4676/91/10379/56898/6050/1351
REACTOME_MITOTIC_PROPHASE	81	0.438697	1.52758	0.00689655	0.0293465	0.0187676	5506	tags=49%, list=29%, signal=35%	5347/983/9133/891/4001/5595/4000/64900/140609/54892/8548/10051/55706/79023/8815/9688/387893/23310/7112/81876/26003/84930/57122/5861/7443/6418/5862/9663/129401/5518/10783/81929/8480/7444/6396/2029/10592/53371/23165/2010
DARWICHE_PAPILLOMA_RISK_LOW_UP	148	0.401542	1.52794	0.00248139	0.0149503	0.00956095	2795	tags=27%, list=15%, signal=23%	2810/55765/6282/11065/4061/6590/5653/6317/7039/3939/3397/10406/56937/7295/8986/824/137797/147841/5230/2023/10615/8801/9689/26355/182/23597/3976/10410/1329/27101/5480/23042/7161/56994/9141/1475/8655/4691/387695/129607
LIU_SOX4_TARGETS_DN	306	0.36533	1.53028	0.00243309	0.0149503	0.00956095	5345	tags=45%, list=28%, signal=33%	6337/4241/3159/286077/64423/8045/3303/2528/3710/2886/3939/89958/444/11282/3158/26298/95/79056/9618/334/2023/6856/23446/57619/9289/4041/1663/80777/6491/55695/150223/4831/7422/3601/10272/10094/2872/7035/6650/6780/10481/10616/79094/22906/10552/1017/901/55706/55236/6183/6184/10963/3069/873/80255/9545/2618/6425/10959/5127/1349/1622/8226/5756/54853/2821/3705/7163/9470/10144/1175/2120/6137/8663/80198/51…
PHONG_TNF_TARGETS_UP	63	0.461305	1.53171	0.00917431	0.0360486	0.0230536	2999	tags=40%, list=16%, signal=33%	3918/1969/6385/3949/8870/2069/5328/8553/8795/7127/51278/11221/6364/650/330/3976/4791/960/1316/3576/9592/3460/3624/3589/3659
NABA_ECM_REGULATORS	237	0.374352	1.53415	0.00248139	0.0149503	0.00956095	1914	tags=22%, list=10%, signal=20%	5268/5645/1510/5646/79148/5644/6590/144568/4316/4320/112399/6317/6768/1476/8754/339366/101/5266/5328/55214/1469/1515/1474/4323/8710/1992/5033/5327/4312/10136/8492/23436/2161/8751/4017/5267/10863/3026/5046/3373/6318/63036/135228/4324/259/4322/7052/51032/1472/102/81792/5269
TURASHVILI_BREAST_DUCTAL_CARCINOMA_VS_LOBULAR_NORMAL_UP	72	0.450257	1.53722	0.00683371	0.0292522	0.0187072	3956	tags=47%, list=21%, signal=37%	54443/7153/259266/1301/51203/9833/3161/29127/55601/1300/51514/5879/4860/55771/55215/3437/1360/55711/2335/10539/56888/27102/286827/22948/2530/3624/163486/219699/65080/115908/1277/55103/122769/131578
SANSOM_APC_TARGETS_REQUIRE_MYC	215	0.382831	1.53723	0.00253165	0.0149503	0.00956095	3829	tags=36%, list=20%, signal=29%	3955/7869/7083/51330/89958/26472/10755/79644/85014/3177/701/285973/6659/26227/55502/51512/84958/8438/1841/55695/64841/55920/51659/84823/284403/9136/57552/8531/10535/220134/23218/10056/55591/7469/84264/6636/89891/5744/10221/4791/347734/8323/4830/9448/400506/54433/8476/9894/4176/126917/7804/115708/2091/637/728294/79847/23576/7760/5886/10328/10280/7112/51013/5426/6599/6472/80198/4598/57060/28989/922…
VERHAAK_GLIOBLASTOMA_MESENCHYMAL	215	0.382884	1.53744	0.00253165	0.0149503	0.00956095	2361	tags=33%, list=13%, signal=30%	3958/6282/6275/221/302/9123/6768/64866/26509/79887/64114/5329/2769/6237/2274/1192/5328/23607/307/7045/645/57804/9961/1824/10312/10538/435/4065/6813/80223/6856/23529/10413/26136/301/240/4258/6284/8942/9144/1265/831/54502/837/53827/8717/1051/6672/841/58472/7764/3601/8792/6303/2000/131566/7421/5836/6778/2014/10095/5358/8273/3489/8826/9208/5971/79709/1890/64778/1289/30846
PASINI_SUZ12_TARGETS_DN	308	0.36698	1.53751	0.00243902	0.0149503	0.00956095	3236	tags=35%, list=17%, signal=30%	9052/3880/2810/6277/306/3875/3856/6281/3675/57530/302/6382/652/51330/7113/64065/64114/2152/8870/1301/1192/4907/2041/8842/25841/977/858/8553/6461/4323/3486/5318/824/4017/157638/6659/9260/9069/23767/1946/112616/114908/64834/26136/1021/80727/2634/11057/301/22822/221035/51278/26872/6319/1265/51114/7171/650/5782/1848/5074/11177/29957/10487/79026/182/7414/2335/7791/131566/22800/6664/871/5912/10512/9208…
WANG_SMARCE1_TARGETS_DN	372	0.361338	1.53769	0.00258398	0.0149503	0.00956095	4085	tags=41%, list=22%, signal=32%	6273/1969/3429/3099/28231/3159/4061/9957/4071/3303/64866/84419/3304/79774/1476/10643/8821/55240/27242/4907/928/9518/10682/6790/858/1855/64151/51809/4940/84002/1846/55872/3157/51192/10403/684/79071/4085/8942/51312/51278/5696/100131187/25878/5698/6890/64761/100507436/59277/79623/6732/80777/1956/55215/1848/6374/840/7052/4599/51022/23597/898/9377/4600/6611/10539/54821/5597/3976/10434/22800/3959/28998…
KIM_WT1_TARGETS_8HR_UP	166	0.397171	1.54047	0.00241546	0.0149503	0.00956095	3041	tags=33%, list=16%, signal=28%	3914/2810/7262/771/3159/4071/90993/133/5339/3303/3304/5329/6662/2069/8061/55715/374/54509/23764/7277/6574/3310/55357/3337/5099/30850/3556/7162/2872/7791/3320/6482/1849/5420/871/5744/4681/56034/10808/5580/10221/7150/5606/5530/171586/8773/11059/80328/3566/10625/3589/9939/29888/87
REACTOME_PROCESSING_OF_CAPPED_INTRON_CONTAINING_PRE_MRNA	240	0.378434	1.5448	0.00251256	0.0149503	0.00956095	6263	tags=53%, list=33%, signal=36%	25804/5437/51639/6628/3185/6637/6626/6635/55706/6636/10262/79023/2963/10465/7884/22827/1478/6634/29894/79228/6632/6633/9688/6631/9939/55660/5441/6627/8175/10921/51503/84321/23658/8683/5093/5725/57122/56259/10713/3183/4116/1665/5439/9092/3184/80145/9343/55110/51692/5440/10212/3191/11051/4904/25949/129401/3181/10992/8106/8896/10285/84844/10236/5546/6429/57819/51690/22938/27238/51691/8189/23451/6629…
MEISSNER_NPC_HCP_WITH_H3K27ME3	79	0.446153	1.54609	0.00455581	0.0217449	0.0139062	2291	tags=28%, list=12%, signal=25%	2300/29785/25833/128434/3219/92359/54101/3217/3216/80326/54626/3227/6928/3784/3206/7022/5590/3215/147699/3207/59307/1045
REACTOME_INTERLEUKIN_1_SIGNALING	102	0.428573	1.54681	0.002331	0.0149503	0.00956095	5370	tags=59%, list=28%, signal=42%	3557/7850/3656/5721/5696/5698/3556/5720/8767/7979/5970/5699/4615/3654/57162/5719/5686/4791/10213/4793/79155/7316/5707/5684/5710/5706/5688/5702/5687/8878/5685/3552/5713/5691/5704/5682/7335/5690/5714/5692/5709/7189/5715/5695/5693/10197/5708/5717/28511/3146/9491/5700/5701/9978/5683/3551/6233/64127/9861/23198
MIKKELSEN_MCV6_LCP_WITH_H3K4ME3	154	0.399979	1.54708	0.00232558	0.0149503	0.00956095	2138	tags=27%, list=11%, signal=24%	10232/84951/4582/3783/11012/26/7498/10158/2859/221/218/9245/132014/165545/201294/9982/64834/159195/85456/2634/301/9289/90060/4939/10223/84958/10164/8824/3430/22874/10581/5639/2011/3959/3669/79679/51719/121512/2014/6737/8743
REACTOME_TRANSCRIPTION_COUPLED_NUCLEOTIDE_EXCISION_REPAIR_TC_NER	78	0.446788	1.54739	0.00675676	0.0292404	0.0186997	6226	tags=63%, list=33%, signal=42%	57804/5437/1022/5111/5984/4331/7316/10987/5427/6119/56655/5425/5441/5426/3150/5424/5982/5439/64708/10714/8451/5440/6917/5985/2073/7515/57654/3978/27339/2967/54107/9978/5438/6233/50813/10450/2068/10980/9318/57461/5432/3980/2965/7874/56949/9716/5434/5983/5436
SANA_TNF_SIGNALING_UP	81	0.444394	1.54742	0.00689655	0.0293465	0.0187676	3555	tags=47%, list=19%, signal=38%	3914/8542/9235/338440/4088/4940/55601/3965/684/7127/4939/8767/6364/51170/4599/6303/219285/57552/4600/330/3959/64135/54625/10964/3576/6372/3624/129607/10318/6373/55074/4314/3106/4319/6892/115908/2495/3107
SARRIO_EPITHELIAL_MESENCHYMAL_TRANSITION_DN	149	0.405485	1.54847	0.00242718	0.0149503	0.00956095	2231	tags=29%, list=12%, signal=26%	3868/23650/3880/4070/6699/5349/6707/3557/6275/10158/3860/7869/3664/728113/1942/9982/928/999/3861/9961/1824/8876/7086/2634/7127/8942/6319/5720/629/760/6303/2872/10581/7035/5287/1825/330/10561/10410/9231/10512/1832/12
PASINI_SUZ12_TARGETS_UP	108	0.42545	1.54897	0.00228833	0.0149503	0.00956095	2857	tags=30%, list=15%, signal=25%	2707/55630/29785/200879/10509/2950/3710/84419/29842/4605/5214/6696/3613/445/54913/9314/6652/79019/10581/7035/57085/57761/400916/79094/5106/55287/7378/55686/51768/3251/23314/84901
REACTOME_TRANSCRIPTIONAL_REGULATION_BY_RUNX3	96	0.432049	1.54976	0.0045045	0.0217221	0.0138917	4921	tags=57%, list=26%, signal=43%	6934/595/6696/6714/4088/3280/10413/7005/5721/57154/5696/5698/5720/3845/7979/7004/5699/182/5719/5686/10213/7316/861/5707/5684/5710/5706/5688/5702/5687/5685/1029/5713/5691/5704/5682/1026/5690/5714/5692/5709/5715/1499/5695/5693/10197/6097/5708/5717/22938/9491/865/5700/84441/5701
GRAESSMANN_RESPONSE_TO_MC_AND_SERUM_DEPRIVATION_DN	79	0.447219	1.54979	0.00455581	0.0217449	0.0139062	3549	tags=37%, list=19%, signal=30%	768/3816/2859/30001/5317/79180/3861/1992/92359/5318/9260/11015/26136/839/7422/3601/51123/25994/64840/8497/54566/2997/11140/7139/7163/2584/51728/51234/10411
DACOSTA_UV_RESPONSE_VIA_ERCC3_COMMON_UP	73	0.452088	1.55204	0.00452489	0.0217449	0.0139062	4215	tags=44%, list=22%, signal=34%	7083/1212/1942/6535/1515/8744/990/10140/7277/8694/9540/7162/5970/10383/5111/7844/873/997/211/6415/1968/3134/51704/30/26156/10614/5985/25949/2261/2073/3265/6199
REACTOME_PROTEIN_UBIQUITINATION	64	0.46446	1.55319	0.00677201	0.0292404	0.0186997	6119	tags=61%, list=32%, signal=41%	11065/29089/8915/27338/51255/5194/10477/5111/55236/7328/997/7316/55829/7347/56852/79577/5828/5192/7317/79139/3093/7324/54926/65264/5195/7320/7319/3105/6233/7322/5591/7323/92305/123169/7321/7336/9810/7874/7332
THILLAINADESAN_ZNF217_TARGETS_UP	40	0.504291	1.55508	0.0113895	0.0424651	0.0271571	1249	tags=25%, list=7%, signal=23%	55971/53834/55143/55450/79682/221150/10635/995/4001/55771
DASU_IL6_SIGNALING_UP	58	0.472998	1.55562	0.0134228	0.0477938	0.0305649	3151	tags=41%, list=17%, signal=35%	9536/4061/5339/3303/375790/8870/1164/10626/4312/23764/6659/1785/4828/1051/7022/3654/10712/25907/994/3576/290/5055/4314/3134
DACOSTA_UV_RESPONSE_VIA_ERCC3_TTD_UP	59	0.471768	1.55799	0.0112867	0.0423523	0.027085	3765	tags=47%, list=20%, signal=38%	5331/2064/4605/4192/578/9260/4597/6303/3814/1337/14/6737/3489/6183/10573/6772/5127/572/114049/811/682/10105/55558/8266/2584/11333/10093/1030
JACKSON_DNMT1_TARGETS_UP	79	0.449641	1.55818	0.00455581	0.0217449	0.0139062	2734	tags=37%, list=14%, signal=32%	1969/3159/6590/7083/1894/2118/2069/5743/9636/3315/9618/9314/22822/3556/1111/3665/4599/3437/5970/901/191/7251/10808/10512/3489/5606/7884/7058/993
SANSOM_APC_TARGETS_UP	124	0.417809	1.56126	0.00232558	0.0149503	0.00956095	3184	tags=36%, list=17%, signal=30%	81607/771/3875/9957/51330/1894/155465/6662/7050/26298/123036/3613/3171/29089/65108/81624/51514/6659/4171/3784/283/83879/55502/1841/2049/2013/7135/8894/10606/6558/57222/10221/7374/960/57590/8379/4176/25923/11140/8836/4610/3615/56984/29968/55124
REACTOME_SIGNALING_BY_TGF_BETA_RECEPTOR_COMPLEX	73	0.455122	1.56246	0.00452489	0.0217449	0.0139062	4747	tags=40%, list=25%, signal=30%	57530/50848/56937/7050/4088/57154/23645/5499/5590/3065/56288/6667/23327/7316/4738/23370/6498/387/3726/51377/1030/8812/5500/9040/22938/7514/60436/4221/10273
YAO_TEMPORAL_RESPONSE_TO_PROGESTERONE_CLUSTER_7	70	0.461297	1.56316	0.00228311	0.0149503	0.00956095	5174	tags=53%, list=27%, signal=39%	306/1265/1396/161882/476/90007/84908/5496/63875/79016/997/10267/29950/79568/1965/10066/2535/5747/10328/10541/83877/6892/4116/84522/7164/8669/55299/3181/6239/3265/153328/7879/8535/3799/84919/55207/5683
UEDA_PERIFERAL_CLOCK	166	0.403357	1.56447	0.00241546	0.0149503	0.00956095	2762	tags=29%, list=15%, signal=25%	6281/4008/51599/2065/3664/9076/1164/23474/79144/10553/205/928/9572/8553/3171/1717/9249/2288/7205/3157/79071/4860/9601/11261/57462/55388/55502/80777/57104/1051/25953/2872/2224/3320/6482/343/10808/5447/51726/25798/5606/54760/3182/211/8519/8655/3566/203068
ZHU_CMV_24_HR_UP	82	0.448318	1.56788	0.00454545	0.0217449	0.0139062	3769	tags=46%, list=20%, signal=37%	3429/3303/1604/5214/9636/7277/3336/2023/4860/9144/2537/6890/27338/2013/4599/2011/6737/10963/7873/54704/211/5684/8519/9688/5687/3589/3659/6627/1434/5902/4869/26003/10135/80273/5321/23516/5690/5440
ZHONG_SECRETOME_OF_LUNG_CANCER_AND_ENDOTHELIUM	62	0.471013	1.56881	0.00900901	0.0358715	0.0229404	2762	tags=42%, list=15%, signal=36%	306/6385/218/3939/999/6696/84790/7534/2597/1356/2023/7086/7167/629/213/60/7414/2335/5269/5111/3959/5052/22883/4191/83707/203068
DAZARD_RESPONSE_TO_UV_SCC_UP	103	0.43601	1.56889	0.00236967	0.0149503	0.00956095	4074	tags=41%, list=22%, signal=32%	4070/306/302/983/1829/6241/5743/7534/7348/10140/5230/6717/8942/5366/6364/7923/5899/26292/5359/6742/10471/3576/3251/5756/1968/10130/6990/7385/10728/132/567/1315/10614/501/3326/6392/6309/5714/5985/57142/51014/9255
DANG_REGULATED_BY_MYC_UP	66	0.465001	1.5711	0.00890869	0.0357266	0.0228477	3562	tags=38%, list=19%, signal=31%	6513/11065/7083/7295/6566/6574/7416/6732/6628/7298/9136/10856/10607/7150/6675/6634/7037/6633/6929/7186/8140/22928/10885/7443/9343
CUI_GLUCOSE_DEPRIVATION	59	0.475997	1.57196	0.00902935	0.0358715	0.0229404	3010	tags=41%, list=16%, signal=34%	54443/1999/192134/983/6241/7050/54541/55872/81620/100506658/5831/9601/5590/4709/11014/51726/5971/2923/2673/5106/7037/811/10130/10628
REACTOME_GLYCEROPHOSPHOLIPID_BIOSYNTHESIS	128	0.421803	1.57274	0.00242131	0.0149503	0.00956095	2622	tags=32%, list=14%, signal=28%	200879/254531/54979/129642/80736/11343/79887/11145/8399/5920/10555/64600/10809/54947/255189/51205/1040/8694/22925/154141/23446/5319/57104/84879/2820/57153/64900/5833/63874/54675/27132/126969/83394/79143/80339/114884/9600/114879/171586/56994/8904
ZHANG_PROLIFERATING_VS_QUIESCENT	47	0.492422	1.57283	0.0110375	0.0416517	0.026637	3402	tags=51%, list=18%, signal=42%	2950/3655/5329/9168/891/595/3315/5757/65108/837/4831/5970/1603/3320/901/6223/1649/3576/8655/6921/2821/3688/4296/387
REACTOME_FORMATION_OF_HIV_ELONGATION_COMPLEX_IN_THE_ABSENCE_OF_HIV_TAT	48	0.490824	1.57321	0.013245	0.0475233	0.0303919	6226	tags=54%, list=33%, signal=36%	5437/6923/1022/7469/4331/2963/6749/6921/5441/7936/5439/5440/8812/25920/6917/6829/11198/2967/22916/5438/2068/51497/5432/2965/5434/5436
ZHANG_BREAST_CANCER_PROGENITORS_UP	414	0.366741	1.57329	0.0026738	0.015151	0.00968933	4934	tags=42%, list=26%, signal=32%	4233/771/54443/79977/55165/7039/7153/1063/3673/1894/1829/3655/6241/130340/8842/23607/699/9833/55143/6790/858/890/144455/11004/990/84962/64151/2059/29128/701/55872/7416/79589/55635/51012/9069/780/2146/4171/83879/5888/9319/86/6120/1111/151648/83787/4522/79801/79101/157570/23043/54675/3070/151188/8502/10056/116984/4697/10051/10606/29899/5634/191/10913/2181/51582/3148/9616/151246/805/8887/140688/8466…
REACTOME_CRISTAE_FORMATION	29	0.548624	1.57374	0.0133333	0.047657	0.0304774	5547	tags=62%, list=29%, signal=44%	10651/509/9551/518/521/54927/514/4580/513/517/10476/125988/539/516/506/10989/10632/3313
BRACHAT_RESPONSE_TO_CAMPTOTHECIN_DN	39	0.513178	1.57451	0.0113636	0.0424651	0.0271571	3497	tags=51%, list=19%, signal=42%	51316/983/307/205/2597/578/3157/2023/57153/10410/25994/8887/8519/572/203068/2821/6576/29968/6741/9694
REACTOME_HOMOLOGY_DIRECTED_REPAIR	103	0.437627	1.57471	0.00236967	0.0149503	0.00956095	5351	tags=50%, list=28%, signal=36%	890/57804/10635/116028/5888/10721/9156/5531/1111/79728/7341/5111/1017/580/5984/5932/83990/7516/2237/83695/7316/5883/79184/5427/7329/6119/7468/56655/146956/7517/5425/5426/5424/80198/5982/10714/63967/641/5985/165918/1763/7515/675/4683/54107/672/11073/10038/6233/29086/6613/5890
REACTOME_DNA_REPAIR	283	0.379469	1.57571	0.00242131	0.0149503	0.00956095	6226	tags=53%, list=33%, signal=36%	9636/890/57804/29089/9768/51514/2175/10635/116028/5888/10721/124739/9156/5437/5531/55215/86/1111/5423/10401/60/79728/7341/1022/5111/4350/1017/4913/580/5984/23583/5932/7374/4331/4255/83990/8607/11284/7516/2237/83695/55247/7316/201254/10987/9246/5883/79184/5427/7329/6119/7520/7468/56655/146956/7517/2177/6612/5425/5886/5441/56852/4436/5426/3150/5424/125476/80198/5982/5439/64708/55120/328/10714/63967…
REACTOME_DUAL_INCISION_IN_TC_NER	65	0.469156	1.57618	0.00675676	0.0292404	0.0186997	6226	tags=63%, list=33%, signal=42%	57804/5437/1022/5111/5984/4331/7316/5427/6119/56655/5425/5441/5426/3150/5424/5982/5439/10714/8451/5440/6917/5985/2073/57654/27339/2967/54107/9978/5438/6233/10450/2068/57461/5432/2965/7874/56949/9716/5434/5983/5436
MONNIER_POSTRADIATION_TUMOR_ESCAPE_DN	366	0.371386	1.57781	0.0025974	0.0149503	0.00956095	3550	tags=32%, list=19%, signal=26%	10232/2707/140576/3875/51316/112399/706/2709/84419/56262/81622/55355/3397/6237/10406/11145/57146/1192/10553/699/205/10682/3241/8553/144455/153768/3656/388564/29089/5318/1356/4017/51192/3693/2634/283991/9601/23645/3417/831/94134/51274/55722/1848/119391/139886/152185/151648/841/1122/7052/1396/29095/55902/7114/83463/4709/54602/415116/84188/3669/131076/901/221908/1337/6737/2181/25994/3148/7082/55959/…
REACTOME_GLOBAL_GENOME_NUCLEOTIDE_EXCISION_REPAIR_GG_NER	84	0.454211	1.57824	0.00232019	0.0149503	0.00956095	6043	tags=58%, list=32%, signal=40%	57804/86/10401/60/7341/1022/5111/5984/4331/8607/7316/10987/5427/7329/6119/56655/6612/5425/5886/5426/5424/125476/5982/64708/10714/8451/5985/2073/7528/7515/3978/4798/5887/2967/83444/79913/54107/9978/10038/6233/50813/6613/2068/10980/9318/7336/10445/3980/2965
WATANABE_RECTAL_CANCER_RADIOTHERAPY_RESPONSIVE_DN	92	0.443809	1.57865	0.00456621	0.0217723	0.0139237	5260	tags=52%, list=28%, signal=38%	1308/3958/5349/822/2950/1829/375790/54474/6493/3336/5584/301/3329/6697/837/8030/10598/7058/2746/1176/5687/3956/87/908/3688/23370/23471/7301/10430/3685/57142/23438/5693/5616/6729/51351/10557/10042/6059/2932/1278/4067/4839/1290/8570/2029/6224/51367
REACTOME_RUNX1_REGULATES_TRANSCRIPTION_OF_GENES_INVOLVED_IN_DIFFERENTIATION_OF_HSCS	70	0.466578	1.58106	0.00228311	0.0149503	0.00956095	5370	tags=67%, list=28%, signal=48%	10413/5721/5696/5698/5720/7979/5699/1022/5719/5686/10213/4331/7161/7316/861/5707/5684/5710/5706/5688/5702/5687/5685/6929/5713/5691/5704/5682/5690/5714/5692/5709/5715/5695/5693/10197/5708/5717/83737/9491/865/5700/5701/5683/6233/9861/23198
ACEVEDO_NORMAL_TISSUE_ADJACENT_TO_LIVER_TUMOR_DN	345	0.37344	1.58132	0.00254453	0.0149503	0.00956095	4426	tags=43%, list=23%, signal=34%	26499/11199/7033/978/6385/3949/726/22977/53834/92840/1672/11145/27346/55974/79180/10555/55034/10809/2288/84706/79720/3157/7263/8694/28992/10263/1729/481/4860/54442/54884/4041/23645/26227/6319/80777/6051/115817/90637/51107/26063/25824/51635/54602/10383/161882/80270/140823/666/400916/130589/23677/1329/191/27289/6636/25921/50814/163782/51726/10221/27102/79590/7873/79155/79751/10613/80024/3927/201254…
REACTOME_NICOTINAMIDE_SALVAGING	19	0.598925	1.58176	0.012605	0.0458615	0.0293292	3597	tags=42%, list=19%, signal=34%	93100/5743/143/54625/10135/84875/128240/83666
REACTOME_TRANSCRIPTION_OF_E2F_TARGETS_UNDER_NEGATIVE_CONTROL_BY_DREAM_COMPLEX	19	0.599582	1.58349	0.012605	0.0458615	0.0293292	2734	tags=37%, list=14%, signal=32%	7153/990/1869/3065/5111/286826/993
HAMAI_APOPTOSIS_VIA_TRAIL_DN	195	0.396803	1.58472	0.00245098	0.0149503	0.00956095	2513	tags=30%, list=13%, signal=26%	54869/7138/55630/7262/28231/3875/5653/64423/54795/9121/2064/5329/7408/1942/55240/79729/10626/9518/9636/79644/6510/3219/8407/1992/4192/7855/29763/2161/9618/1535/54913/6659/58516/51129/5792/5831/8942/6195/7137/4828/53827/147645/10272/23564/5119/230/10581/602/2306/284266/871/10904/1890/27201/5106/997/10062/6274
JIANG_HYPOXIA_VIA_VHL	19	0.6002	1.58513	0.012605	0.0458615	0.0293292	5212	tags=63%, list=28%, signal=46%	26010/26136/64968/55825/55075/5424/6175/9255/51693/27258/2026/2764
GALLUZZI_PREVENT_MITOCHONDIAL_PERMEABILIZATION	23	0.583535	1.58625	0.0109649	0.0416054	0.0266074	1549	tags=35%, list=8%, signal=32%	4582/3099/706/7295/598/578/7416/7417
FERNANDEZ_BOUND_BY_MYC	179	0.404938	1.58636	0.00247525	0.0149503	0.00956095	3116	tags=32%, list=17%, signal=27%	1048/4582/4233/2950/2305/3291/3655/1476/4605/6493/5266/27113/5317/9572/7295/3613/10312/5757/3336/1869/2023/3329/9144/4000/5423/841/602/10535/3145/6573/3669/10606/7866/6778/4913/8165/7150/1207/378/4830/9351/3661/7884/2356/375/4176/5245/7037/6715/682/4893/71/6157/5425/7042/10428/197/3688
CHYLA_CBFA2T3_TARGETS_DN	226	0.390615	1.58647	0.0025	0.0149503	0.00956095	2360	tags=22%, list=13%, signal=20%	1510/688/7262/1364/8638/3816/7103/92745/1728/23555/200634/129642/3934/54716/63898/64129/11343/84419/440603/64714/645/124222/4323/3321/79589/23541/9401/79628/64762/3732/162417/9056/59277/8824/4000/3665/58472/677/80139/388581/10107/83463/2239/3669/29899/4259/84804/653808/1289/51280
GEORGES_CELL_CYCLE_MIR192_TARGETS	60	0.479104	1.59134	0.0135747	0.0480307	0.0307164	2227	tags=32%, list=12%, signal=28%	4288/5328/9928/29127/51514/3269/23397/5888/10721/4085/55388/5499/3206/9585/84823/23677/9231/5358/7150
STEIN_ESRRA_TARGETS_UP	381	0.373161	1.59138	0.00257732	0.0149503	0.00956095	4598	tags=40%, list=24%, signal=31%	3783/79152/771/27134/64063/9123/10848/112399/55040/1829/6820/55240/26873/6692/10553/5214/9518/10682/6790/4883/6624/6566/3613/54509/95/10312/8694/481/80772/23541/4258/5898/10637/10226/2101/6195/1159/373156/55286/3098/11322/79991/8635/9334/7417/9517/26355/7422/10360/230/3628/79077/5833/11235/9377/65981/54187/29088/1591/10651/509/11344/23286/1632/1329/8165/25994/6183/4259/518/5480/54205/5236/65003/7…
REACTOME_EPHB_MEDIATED_FORWARD_SIGNALING	42	0.513741	1.59185	0.0135135	0.0479704	0.0306779	4222	tags=69%, list=22%, signal=54%	1947/2051/1948/2050/6714/5058/1072/5879/2049/60/7525/10094/10552/10095/8997/10092/8976/10109/71/5747/10096/3984/387/64283/10093/5921/998/3265/10097
STEIN_ESRRA_TARGETS_RESPONSIVE_TO_ESTROGEN_UP	30	0.551803	1.59277	0.0134831	0.0479355	0.0306556	2689	tags=47%, list=14%, signal=40%	7031/771/8870/54733/6566/9748/8795/4173/80179/760/5984/51765/5245/2444
FERRANDO_T_ALL_WITH_MLL_ENL_FUSION_DN	87	0.453586	1.59315	0.00230947	0.0149503	0.00956095	4513	tags=59%, list=24%, signal=45%	6275/3159/11065/7153/3706/9088/6510/7295/6192/2597/5355/9768/334/6652/4171/6548/4001/27338/7298/4600/5111/1017/580/10036/3148/518/6240/8662/201254/3251/6921/1176/9688/5687/5425/1434/5902/9588/7867/6389/5690/10212/1351/5520/8073/23649/5223/2806/1936/9100/51450
AMIT_EGF_RESPONSE_480_MCF10A	43	0.509926	1.59363	0.013363	0.0476931	0.0305006	2600	tags=40%, list=14%, signal=34%	26499/7262/3673/6662/3241/54509/27076/5366/7422/57761/387509/5744/2673/57403/55686/2297/8636
PRAMOONJAGO_SOX4_TARGETS_DN	48	0.497359	1.59416	0.013245	0.0475233	0.0303919	4018	tags=50%, list=21%, signal=39%	9536/4061/9787/11005/27346/332/10112/891/2063/8751/1033/27338/6183/55353/10959/11332/10280/5424/5725/1201/64087/3191/513/2653
SAGIV_CD24_TARGETS_DN	44	0.508983	1.59459	0.0112867	0.0423523	0.027085	2655	tags=41%, list=14%, signal=35%	8638/1893/638/2051/7286/5328/1474/9518/2017/23645/3669/79094/2014/5971/2297/81603/80328/3576
SCHLOSSER_MYC_TARGETS_AND_SERUM_RESPONSE_DN	48	0.497622	1.595	0.013245	0.0475233	0.0303919	4007	tags=50%, list=21%, signal=39%	3939/3068/6732/3654/5373/10606/8165/24140/23016/10440/23212/4691/5901/9188/10969/2091/7347/22934/1434/5036/26156/1736/9801/9830
ZHOU_TNF_SIGNALING_30MIN	52	0.493882	1.59638	0.0134831	0.0479355	0.0306556	4379	tags=58%, list=23%, signal=44%	3429/3159/1192/5743/3861/8407/3315/5355/7277/10207/27173/25824/10383/3069/10131/7009/8997/4176/5245/9592/51614/10280/3726/517/8872/1499/5695/10992/6134/5518
JAZAERI_BREAST_CANCER_BRCA1_VS_BRCA2_UP	47	0.499795	1.59638	0.0110375	0.0416517	0.026637	4568	tags=51%, list=24%, signal=39%	9787/2222/6548/6374/6923/22913/10262/5606/4331/861/2618/572/813/7284/2783/56259/5525/26155/5062/9567/207/5500/9898/29966
REACTOME_TRANSCRIPTIONAL_REGULATION_BY_TP53	359	0.376847	1.59725	0.00259067	0.0149503	0.00956095	5206	tags=43%, list=28%, signal=32%	2810/22974/10848/983/64065/79370/55240/2877/27113/332/891/6790/890/54541/7534/8797/144455/7295/3486/8795/1869/9212/9540/995/116028/85456/5366/9156/5371/5437/55215/79733/839/1111/6923/55571/28956/25824/79837/3065/843/898/9377/10419/1022/5111/7469/4697/1017/1329/1340/1337/580/1345/5984/5052/8793/5932/54205/4331/2963/83990/6881/27166/7161/83695/8626/7316/5883/1349/124446/6749/6921/54815/637/387893/6…
BILD_SRC_ONCOGENIC_SIGNATURE	56	0.488193	1.5974	0.00902935	0.0358715	0.0229404	3698	tags=39%, list=20%, signal=32%	150696/55612/771/6241/8853/6714/6744/23645/115817/6526/131566/5744/10808/6558/7804/4999/23023/5055/125476/55120/1277/23150
SENGUPTA_NASOPHARYNGEAL_CARCINOMA_UP	297	0.381278	1.59828	0.00239808	0.0149503	0.00956095	2783	tags=31%, list=15%, signal=27%	55612/54443/55165/118932/7153/1063/983/1894/6241/9787/5328/1948/51203/9055/5743/9833/9603/146909/890/11130/3832/64151/79682/29128/29127/55601/1062/57082/8795/701/9768/55872/4173/7272/83540/81624/51514/6659/55789/135398/10635/10403/684/9837/23446/2146/83879/4085/56992/55771/5366/3417/219988/64105/899/55215/11335/1111/23779/7298/157570/23333/2335/3070/151188/8502/55591/5111/10051/3223/11169/64135/5…
MCBRYAN_PUBERTAL_BREAST_5_6WK_UP	118	0.432066	1.59838	0.00236407	0.0149503	0.00956095	3229	tags=39%, list=17%, signal=33%	688/150696/27134/79083/3775/2065/1829/10276/3304/1366/120224/7430/27242/634/9603/6696/51809/3852/9414/5318/29841/100506658/154141/481/3417/5074/7022/57153/29957/284996/9580/80221/56034/10904/12/4254/54751/23080/6478/390/1962/290/4314/26262/3895/7465
SENESE_HDAC1_TARGETS_UP	434	0.37143	1.59911	0.00266667	0.015151	0.00968933	3167	tags=32%, list=17%, signal=27%	3914/3918/4233/28231/80117/3159/10644/4071/5801/5339/23657/6947/51330/3673/1829/3655/1604/10643/84612/7430/55240/55785/444/130340/5266/5328/8061/699/79413/1525/7534/6566/598/3656/4312/4257/23764/8795/118429/4173/1495/13/6744/9069/90861/58516/1021/4860/29766/221035/57707/8942/51312/4862/6364/51274/3297/650/5782/6374/90407/55432/51107/760/80149/10733/7422/7052/9991/5829/137994/157570/3814/7035/102/…
PID_SYNDECAN_2_PATHWAY	33	0.534278	1.59928	0.0130719	0.0472517	0.0302183	4162	tags=45%, list=22%, signal=35%	3909/3673/7430/858/6714/5595/2335/5580/8573/3576/3688/387/5921/581/3265
SHEPARD_BMYB_MORPHOLINO_DN	201	0.401644	1.60005	0.00252525	0.0149503	0.00956095	2057	tags=28%, list=11%, signal=26%	3691/3872/128239/3159/54443/22974/4288/991/7083/2305/983/9787/259266/2266/9076/11166/332/9055/11282/891/9833/645/9928/990/3177/3832/4192/29128/4173/84706/7272/116447/9212/9837/4171/83461/55771/157313/54820/629/51512/8824/79019/648791/10460/29957/51659/55902/6242/7341/3070/80221/6664/476/1017/5836/901
KEGG_STEROID_HORMONE_BIOSYNTHESIS	55	0.489814	1.60041	0.011236	0.0422639	0.0270284	2952	tags=31%, list=16%, signal=26%	54575/3294/3291/6820/1577/79644/6783/8644/7364/54658/7923/412/1312/51144/54578/6715/79799
KIM_LIVER_CANCER_POOR_SURVIVAL_UP	22	0.594069	1.60053	0.010989	0.0416369	0.0266275	2705	tags=55%, list=14%, signal=47%	4071/51155/2152/226/54541/3486/5315/5898/10099/8826/81539/10109
REACTOME_INFECTIOUS_DISEASE	380	0.376481	1.60158	0.00263158	0.0150912	0.00965105	5267	tags=51%, list=28%, signal=37%	4233/3159/92421/3303/130340/10053/928/999/9636/6714/6192/1500/118429/79720/1104/402569/5879/5721/79849/5696/5698/128866/5720/6132/5437/116832/7979/1174/5478/6923/25978/6804/5699/27243/1022/3320/7469/93343/5719/55706/7251/2961/5686/6187/6223/79023/5606/10213/10015/4331/8815/200916/2963/6881/51065/23327/2237/6227/6159/7316/5707/6158/5684/375/5710/3840/5901/5706/6173/5688/6749/6921/51510/5702/6229/9…
BASAKI_YBX1_TARGETS_DN	373	0.37685	1.60223	0.00257732	0.0149503	0.00956095	1821	tags=20%, list=10%, signal=19%	84985/4582/10103/4233/771/3429/6819/3099/54575/79838/80117/6590/129642/3934/4316/10509/133/23657/5002/2591/85414/7851/2886/10276/1604/10205/8645/444/4907/205/999/6696/9518/1525/54541/8553/55450/1992/5033/54843/445/4312/81031/10312/3280/9249/23764/6574/65108/10529/5230/23767/58516/684/23446/4860/642273/6548/5046/10447/6319/79623/54502/1848/8635/26355/7422/389792/8792/6303/9685/56889/230/7035/7105
JIANG_HYPOXIA_NORMAL	196	0.402324	1.60274	0.0025	0.0149503	0.00956095	4547	tags=42%, list=24%, signal=32%	9052/6513/3691/771/51599/4605/6713/444/4907/6307/307/205/928/645/10555/5033/54101/4192/1717/3486/6920/10076/6813/51129/25987/23645/29923/6319/5782/26355/7052/23779/5699/230/8894/9181/10342/6780/10617/7511/11079/56034/6992/56888/51526/997/7378/56994/8904/9804/3840/4691/26471/29911/2938/5034/10947/7779/54676/4817/4598/57586/3309/55647/163/5507/23255/84061/51428/998/9792/64847/483/9514/5333/7324/261…
REACTOME_SIGNALING_BY_NOTCH4	82	0.459018	1.6053	0.00227273	0.0149503	0.00956095	5335	tags=63%, list=28%, signal=46%	7534/4088/3280/5721/5696/5698/5720/7979/5663/51107/10460/5699/182/102/5719/5686/10213/55851/7316/5707/5684/5710/5706/5688/5702/5687/5685/5713/5691/5704/5682/5690/5714/5692/5709/5715/5695/5693/207/10197/5708/5717/22938/9491/5700/84441/5701/9978/5683/23385/6233/9861
FARMER_BREAST_CANCER_APOCRINE_VS_LUMINAL	323	0.381071	1.60553	0.00249377	0.0149503	0.00956095	2437	tags=29%, list=13%, signal=26%	7031/57402/3855/9022/8638/7033/7103/1382/10158/2582/6590/30001/133/57016/3294/79669/55359/2591/7083/7113/1476/7264/1718/8754/55240/11145/9076/5768/5266/6307/205/2222/4088/4488/27347/5033/445/1717/222/563/5318/7277/64108/1978/3157/55503/334/5230/684/10413/4860/11057/1573/5099/6284/57707/8942/5046/5366/3417/6319/1956/5445/10099/51097/9517/7422/3430/653784/90355/55711/23564/2872/8030/9650/5291/54682…
LIU_CMYB_TARGETS_UP	159	0.414115	1.60648	0.00234192	0.0149503	0.00956095	3180	tags=33%, list=17%, signal=28%	3868/10103/771/1728/8714/63898/6241/5834/6662/2274/79144/205/7045/25841/7050/3241/79153/3613/10140/161291/445/58495/11135/80223/2146/7784/54502/5595/839/3382/4496/9991/6303/182/54836/2011/3669/9537/8165/2014/8273/12/4521/3638/29901/55344/23314/6715/256987/51053/613/11332/10610
MODY_HIPPOCAMPUS_PRENATAL	35	0.533022	1.60701	0.00907029	0.0359372	0.0229824	3830	tags=40%, list=20%, signal=32%	11065/7153/9133/1164/25804/6132/8894/5111/901/6137/6136/689/9343/6156
COULOUARN_TEMPORAL_TGFB1_SIGNATURE_DN	135	0.425753	1.60719	0.00238095	0.0149503	0.00956095	2784	tags=38%, list=15%, signal=32%	3958/347735/8091/978/8714/3949/2706/5097/64787/1718/6698/6307/1525/3248/6783/1717/1500/3486/3157/10188/11261/3026/51312/957/3417/2875/1848/115817/55343/182/5833/57761/10056/2224/9531/79792/84326/64598/8991/2181/5971/2937/29948/51734/6452/1595/211/9246/9446/65249/54206
KOKKINAKIS_METHIONINE_DEPRIVATION_48HR_UP	129	0.429383	1.60776	0.0023753	0.0149503	0.00956095	3765	tags=42%, list=20%, signal=34%	2950/2065/51330/3664/983/2064/64065/5329/9133/2069/5328/205/891/999/8797/2222/3315/5327/3486/8795/64108/4860/4258/10721/650/839/7098/8717/5423/840/4615/898/330/7474/3320/1017/8743/4255/2237/3576/9446/993/637/7042/3552/6498/7465/3156/27430/6464/1026/6309/1635/1030
BHAT_ESR1_TARGETS_VIA_AKT1_DN	80	0.463386	1.60875	0.00458716	0.0218276	0.0139591	1134	tags=29%, list=6%, signal=27%	8000/1001/57530/9121/1942/1948/26298/5493/598/2059/8412/9569/54843/29841/84632/3321/5916/55625/157638/481/51141/1021/57619
POMEROY_MEDULLOBLASTOMA_PROGNOSIS_DN	43	0.515483	1.611	0.00890869	0.0357266	0.0228477	4430	tags=60%, list=23%, signal=46%	3159/1063/4605/1082/2023/7086/6717/471/2683/1605/580/6223/994/10131/6159/6633/9918/6157/6627/6165/517/1351/2261/3921/6230/6222
GENTILE_RESPONSE_CLUSTER_D3	50	0.497866	1.61171	0.0131004	0.0472517	0.0302183	2731	tags=28%, list=14%, signal=24%	22943/4071/1164/990/2063/9837/10733/2000/5420/10904/7374/7884/6478/5427
SHETH_LIVER_CANCER_VS_TXNIP_LOSS_PAM2	164	0.414714	1.6126	0.00238663	0.0149503	0.00956095	2579	tags=37%, list=14%, signal=32%	5652/55630/6282/7103/3557/302/5357/1829/6241/79370/120224/8870/54863/1948/891/595/858/57804/6624/9232/124222/84962/3161/8407/389/80326/8876/83540/51192/23231/23529/780/4171/9289/84418/27293/6319/94134/1848/5074/10460/4648/118881/90355/85461/6242/57761/11344/1329/5359/80339/653808/5236/51280/1649/9843/7378/84722/9448/30851/112479
REACTOME_HDR_THROUGH_HOMOLOGOUS_RECOMBINATION_HRR	67	0.478047	1.61276	0.00227273	0.0149503	0.00956095	5620	tags=58%, list=30%, signal=41%	57804/10635/116028/5888/9156/1111/79728/5111/580/5984/5932/83990/7516/83695/7316/5883/5427/6119/56655/146956/7517/5425/5426/5424/80198/5982/10714/641/5985/1763/675/4683/54107/672/11073/6233/5890/545/10111
REACTOME_RHO_GTPASES_ACTIVATE_PKNS	34	0.533259	1.6131	0.013245	0.0475233	0.0303919	4275	tags=50%, list=23%, signal=39%	2810/79784/7534/103910/389/5058/5879/995/5586/23028/7529/29941/387/354/7532/5500/4627
REACTOME_MAPK6_MAPK4_SIGNALING	90	0.456462	1.61549	0.00228311	0.0149503	0.00956095	4626	tags=57%, list=25%, signal=43%	983/2118/148170/3315/5058/3337/5879/5721/5696/5698/5720/7979/10435/5699/5597/5719/5686/10213/8997/7316/5707/5684/5710/5706/5688/5702/5687/5685/10642/5713/5691/5704/5682/4319/5690/5714/998/5692/5709/4343/5715/5062/5695/5693/5896/10197/5708/5717/7514/27161/9491
KIM_WT1_TARGETS_12HR_DN	210	0.403618	1.61593	0.0025	0.0149503	0.00956095	3481	tags=37%, list=18%, signal=31%	9052/26499/3918/8091/79838/51316/57228/51155/7286/347902/10643/7430/56938/444/56937/595/55450/3606/3321/1495/26233/1082/11261/5202/26872/9144/10447/25804/1956/837/3206/11335/1488/9517/677/7764/79101/25996/81671/1591/28998/1849/1404/50814/10512/5359/6187/23583/4254/2963/7873/3182/960/2237/2131/115939/2297/23212/8976/7804/390/10959/3624/7347/26354/8886/7112/80324/132/23658/55233/11082/9191/10139/51…
MCCABE_HOXC6_TARGETS_CANCER_DN	20	0.607276	1.61672	0.0127119	0.0461782	0.0295317	3478	tags=60%, list=18%, signal=49%	5331/10053/3486/9780/122704/5663/5074/9517/54206/84269/79042/9367
WAGNER_APO2_SENSITIVITY	26	0.579685	1.61676	0.0133038	0.0475877	0.0304331	1719	tags=38%, list=9%, signal=35%	2525/11227/2591/2528/11226/2524/79695/79623/2526/55568
BRUECKNER_TARGETS_OF_MIRLET7A3_UP	108	0.444554	1.61853	0.00228833	0.0149503	0.00956095	2487	tags=34%, list=13%, signal=30%	3914/22943/55612/1999/171177/64065/6820/1604/2118/1942/2266/54997/1525/55366/311/2195/157638/9314/1021/84418/5445/5782/3845/23092/5423/9334/7417/6303/7035/1591/5111/23286/6558/5052/3169/9545/2296
TONKS_TARGETS_OF_RUNX1_RUNX1T1_FUSION_SUSTAINDED_IN_ERYTHROCYTE_UP	44	0.516933	1.61949	0.00902935	0.0358715	0.0229404	1577	tags=41%, list=8%, signal=38%	3557/1728/1893/302/4071/23657/7851/347902/3397/6934/9518/3315/5327/6659/780/2634/1848/7764
YANG_BREAST_CANCER_ESR1_BULK_DN	23	0.596449	1.62136	0.00877193	0.0354216	0.0226527	2983	tags=52%, list=16%, signal=44%	3898/5329/8645/259266/1672/5214/7272/114908/1051/9175/8833/4690
FARMER_BREAST_CANCER_CLUSTER_7	20	0.609136	1.62167	0.0105932	0.040632	0.0259848	2084	tags=50%, list=11%, signal=45%	80004/999/645/4488/222/10265/23443/6319/440026/27289
WHITFIELD_CELL_CYCLE_S	141	0.428683	1.6223	0.00239808	0.0149503	0.00956095	3582	tags=38%, list=19%, signal=31%	200879/7153/1294/6241/57211/113130/9088/6581/11130/55723/79682/29089/9768/2175/10635/8318/51141/2146/5888/400986/9156/8438/828/8543/79733/79019/90990/7764/7298/253650/157570/4664/3070/6667/114822/29028/5984/143872/5932/83990/51526/2237/6240/220042/23023/5558/80263/56852/84930/5982/835/6464/79075/253782
NABA_ECM_AFFILIATED	170	0.416868	1.62249	0.00241546	0.0149503	0.00956095	1389	tags=21%, list=7%, signal=20%	4586/83998/4582/140453/11199/389376/4585/94025/3958/3960/306/6385/302/6382/10509/653145/5967/7869/4583/200958/728113/727897/57715/8482/307/4584/3965/311/5968/394263/5068/55600/301/729238/312/5365
UDAYAKUMAR_MED1_TARGETS_UP	130	0.431706	1.62328	0.002331	0.0149503	0.00956095	4072	tags=39%, list=22%, signal=31%	5307/6382/9123/444/6790/858/990/6566/1500/9748/5757/9768/1978/7355/5792/23086/54502/1841/23246/80179/5074/64795/6573/2181/25994/10036/5586/56994/8379/6259/5245/7804/9317/80321/327/10328/7965/7112/8175/29968/10527/92140/1665/10228/6182/56954/2230/5211/8721/9949/51014
WHITFIELD_CELL_CYCLE_G1_S	125	0.434901	1.62416	0.00235294	0.0149503	0.00956095	4478	tags=44%, list=24%, signal=34%	6382/6317/990/29128/4173/1869/51514/154141/116028/9401/4171/83879/374393/139886/51659/898/55608/5111/580/29028/10036/7374/7884/83939/861/80308/993/10625/55344/51053/80263/55536/4998/4436/10947/3110/1509/835/55656/79075/10714/195828/63967/6944/54532/6747/116225/1870/79968/4175/3265/27301/10458/97/10717
SUNG_METASTASIS_STROMA_DN	53	0.499866	1.62458	0.00665188	0.0290841	0.0185998	2986	tags=43%, list=16%, signal=37%	113130/4495/9088/79682/1869/4493/8318/4860/143/1956/1841/382/377007/3185/4496/54892/51635/3070/5111/51071/5427/51053/4314
REACTOME_BUDDING_AND_MATURATION_OF_HIV_VIRION	28	0.572683	1.62796	0.00888889	0.0357085	0.0228362	3458	tags=54%, list=18%, signal=44%	92421/79720/128866/5478/25978/27243/93343/7251/10015/23327/7316/51510/51652/51160/55048
SUNG_METASTASIS_STROMA_UP	108	0.447242	1.62831	0.00228833	0.0149503	0.00956095	3705	tags=45%, list=20%, signal=37%	22943/1382/6385/3775/1604/375790/307/5743/5920/6566/5033/2059/445/222/3157/23231/7086/240/2537/6319/23012/8543/1848/115817/4248/1303/102/131566/5639/81671/4179/9086/1289/51280/5351/7058/966/2935/811/157506/55075/286343/7461/6591/10614/23362/3726/5738/80381
WANG_ADIPOGENIC_GENES_REPRESSED_BY_SIRT1	26	0.583899	1.62851	0.0133038	0.0475877	0.0304331	3015	tags=54%, list=16%, signal=45%	6513/30001/112399/5214/2597/5230/2023/7167/57761/400916/25994/873/1962/2821
MANN_RESPONSE_TO_AMIFOSTINE_UP	19	0.616763	1.62887	0.0105042	0.0403237	0.0257877	4516	tags=53%, list=24%, signal=40%	6275/9518/837/677/4738/1371/5886/1026/4832/2936
YAMAZAKI_TCEB3_TARGETS_DN	192	0.410591	1.63034	0.0025	0.0149503	0.00956095	3090	tags=34%, list=16%, signal=29%	3880/1001/10551/6277/3958/3159/3775/7153/1894/4751/1829/1366/4072/1718/4605/1164/10112/51203/999/7050/6696/6790/23204/2222/3832/29128/7855/10653/701/6574/3157/7416/1535/58516/1729/301/27338/6888/1848/1488/7022/4282/157570/898/57085/10383/3320/51804/10856/23286/55196/55959/133418/84722/643161/10598/5245/8519/10969/203068/7037/7203/7520/55536/6627/7163
SMID_BREAST_CANCER_RELAPSE_IN_BONE_UP	94	0.45792	1.63037	0.00454545	0.0217449	0.0139062	1679	tags=31%, list=9%, signal=28%	1048/7031/4680/4582/10103/10551/771/7033/8537/79083/25803/10753/80736/7869/11226/80162/8821/9620/2813/3158/51809/1846/9185/4151/2203/10309/51097/1396/1360
RASHI_RESPONSE_TO_IONIZING_RADIATION_3	45	0.517789	1.63156	0.0113379	0.042442	0.0271424	2384	tags=27%, list=13%, signal=23%	3549/3613/6697/7137/10401/60/23286/84908/4363/7328/54760/80305
LAU_APOPTOSIS_CDKN2A_UP	55	0.50016	1.63421	0.00674157	0.0292404	0.0186997	4130	tags=49%, list=22%, signal=38%	51330/4605/8744/598/8795/1869/9618/8915/10298/29775/5074/841/8772/26292/5111/8793/54205/10015/637/51053/7159/10016/835/1026/1611/5885/5062
REACTOME_COBALAMIN_CBL_VITAMIN_B12_TRANSPORT_AND_METABOLISM	21	0.610913	1.63668	0.00854701	0.0345732	0.0221101	2147	tags=38%, list=11%, signal=34%	5646/81693/5644/6947/1504/440387/11330/4363
REACTOME_SYNTHESIS_OF_ACTIVE_UBIQUITIN:_ROLES_OF_E1_AND_E2_ENZYMES	30	0.568144	1.63994	0.00674157	0.0292404	0.0186997	5325	tags=60%, list=28%, signal=43%	11065/29089/27338/10477/55236/7328/997/7316/7347/7317/3093/7324/54926/65264/7320/7319/6233/7322
DOANE_BREAST_CANCER_ESR1_UP	109	0.45073	1.64045	0.00232558	0.0149503	0.00956095	835	tags=23%, list=4%, signal=22%	9052/7031/4582/54869/6337/7138/10103/10551/771/27134/7033/79838/79083/3875/25803/80736/7869/54961/8821/9620/374/9518/51809/1846/563
SHEPARD_BMYB_TARGETS	75	0.474976	1.64109	0.00220264	0.0149503	0.00956095	1988	tags=40%, list=11%, signal=36%	3159/54443/22974/4288/991/7083/2305/983/9787/259266/11166/332/9055/891/9833/9928/3832/4192/7272/9212/83461/55771/157313/54820/51512/648791/10460/6242/6664/476
EINAV_INTERFERON_SIGNATURE_IN_CANCER	26	0.588954	1.64261	0.0133038	0.0475877	0.0304331	2665	tags=54%, list=14%, signal=46%	4061/7050/9636/684/4939/2537/6672/3430/4599/3437/10561/10964/9246/6772
STEIN_ESRRA_TARGETS_RESPONSIVE_TO_ESTROGEN_DN	41	0.534402	1.64292	0.00917431	0.0360486	0.0230536	2734	tags=49%, list=14%, signal=42%	26509/444/990/79682/51514/4171/55388/1138/51659/54892/5111/10051/11169/29028/11001/2237/6240/55055/5427/993
REACTOME_COLLAGEN_FORMATION	90	0.464291	1.6432	0.00228311	0.0149503	0.00956095	990	tags=18%, list=5%, signal=17%	1308/3914/3918/3691/3909/4316/5339/1294/3655/1301/55214/977/1515/5033/1300/4017
FURUKAWA_DUSP6_TARGETS_PCI35_UP	71	0.483343	1.64332	0.00230415	0.0149503	0.00956095	1268	tags=27%, list=7%, signal=25%	3872/5349/54979/250/84419/200958/9235/5920/3861/4192/1846/81031/64108/6659/8644/100133941/29108/84978/5698
REACTOME_NUCLEOTIDE_EXCISION_REPAIR	110	0.452657	1.64422	0.00235294	0.0149503	0.00956095	6226	tags=61%, list=33%, signal=41%	57804/5437/86/10401/60/7341/1022/5111/5984/4331/8607/7316/10987/5427/7329/6119/56655/6612/5425/5886/5441/5426/3150/5424/125476/5982/5439/64708/10714/8451/5440/6917/5985/2073/7528/7515/57654/3978/4798/5887/27339/2967/83444/79913/54107/9978/5438/10038/6233/50813/6613/10450/2068/10980/9318/57461/7336/10445/5432/3980/2965/7874/56949/9716/5434/5983/5436
REACTOME_DEGRADATION_OF_THE_EXTRACELLULAR_MATRIX	140	0.434262	1.64463	0.00239808	0.0149503	0.00956095	1913	tags=26%, list=10%, signal=24%	1308/3914/5645/3918/388743/3909/5650/5644/10753/4316/726/4320/1294/8754/1301/101/999/1515/6696/4323/823/4312/1300/824/1504/8751/440387/831/5663/4324/4322/1303/102/2335/147968/6650/826
REACTOME_FGFR2_ALTERNATIVE_SPLICING	27	0.578464	1.64509	0.0107296	0.0410014	0.0262211	3769	tags=37%, list=20%, signal=30%	54845/80004/5437/3185/2263/2963/5441/5725/5439/5440
LOCKWOOD_AMPLIFIED_IN_LUNG_CANCER	210	0.410993	1.64546	0.0025	0.0149503	0.00956095	4875	tags=46%, list=26%, signal=35%	4233/6277/6282/4061/7286/7264/1163/858/57804/1717/3068/80194/65078/26136/116028/84988/6284/5499/10072/57175/6150/5437/1956/27173/5083/283635/11177/7422/8772/7170/56288/56704/23480/10904/93185/65003/1649/960/394/22948/63905/145282/4521/1981/22827/4176/29894/58533/7037/51586/55226/6715/1181/5886/908/10654/29956/6498/2783/9191/1662/128240/65005/10016/4720/5439/6464/317762/6389/6746/10652/8500/11179/…
PID_AURORA_B_PATHWAY	37	0.540716	1.646	0.0113122	0.0424119	0.0271231	3402	tags=54%, list=18%, signal=44%	332/10112/699/55143/6790/11004/64151/29127/1058/9212/10403/23397/151648/3619/10051/5684/4691/9918/4869/387
KEGG_GLYCOSPHINGOLIPID_BIOSYNTHESIS_LACTO_AND_NEOLACTO_SERIES	26	0.590276	1.6463	0.0133038	0.0475877	0.0304331	2436	tags=46%, list=13%, signal=40%	2525/10331/28/2528/2524/10317/84002/8702/2526/2683/6484/8704
REACTOME_TELOMERE_MAINTENANCE	35	0.546103	1.64645	0.00680272	0.0292404	0.0186997	4554	tags=60%, list=24%, signal=46%	57804/5111/10856/5984/8607/2237/5427/6119/56655/5558/5425/5426/5424/5982/10714/55651/1736/5985/23649/1763/3978
WHITFIELD_CELL_CYCLE_M_G1	127	0.441733	1.64699	0.00241546	0.0149503	0.00956095	5470	tags=54%, list=29%, signal=39%	10024/9055/595/9518/9232/55872/81839/58516/100133941/1033/10226/3845/5663/11335/10765/10362/7414/1022/23286/29097/10712/7150/1832/79023/147179/60312/8655/5901/2935/80321/79650/51503/6009/3433/80273/51042/55048/11163/57181/23596/9712/10915/7090/3267/1736/9801/57169/998/5520/5885/7528/3434/55791/136319/339287/8087/55646/3608/6880/10146/6428/10766/23367/81611/55291/28973/57532/84168/7323
WANG_CLIM2_TARGETS_DN	175	0.421335	1.64711	0.00245098	0.0149503	0.00956095	4182	tags=37%, list=22%, signal=29%	3958/53836/10848/51330/10205/6237/6307/54809/9636/221393/51809/103910/116092/2161/3157/6856/100133941/54442/26020/2537/94134/283149/1174/6672/84280/284996/140609/182/8548/6482/30833/83940/9208/6674/8690/51454/10987/30851/6772/10109/8813/51510/6711/5558/55660/5203/5978/908/56852/64746/51025/65005/90480/84529/8898/10955/9929/10379/23560/5985/84105/1211/51018/3434
MOHANKUMAR_HOXA1_TARGETS_UP	398	0.385986	1.64753	0.00265957	0.015151	0.00968933	4383	tags=42%, list=23%, signal=33%	6337/1001/771/8612/1382/7020/991/5347/7869/983/11226/6241/79887/3304/2626/1366/3939/9133/8870/11145/10053/10553/699/25841/26504/84790/8553/91683/11130/144455/990/55723/823/2628/2195/9768/6574/65108/79041/9618/28969/51527/1104/10265/5315/3337/23446/10615/8942/25987/10072/57175/80777/54502/60488/86/4522/79801/10435/10204/402778/162966/55699/7035/10098/10383/3070/6650/8502/55379/10056/3145/5111/1060…
ZWANG_EGF_PERSISTENTLY_DN	59	0.498918	1.64766	0.00677201	0.0292404	0.0186997	3684	tags=47%, list=20%, signal=38%	10103/8714/11254/9121/3710/81622/2036/57804/27198/147841/28992/26027/6120/57217/29095/402778/23218/5818/27315/5106/83707/29911/79654/100288413/84233/80206/55120/55152
REACTOME_THE_CITRIC_ACID_TCA_CYCLE_AND_RESPIRATORY_ELECTRON_TRANSPORT	161	0.424268	1.64775	0.00234742	0.0149503	0.00956095	5819	tags=58%, list=31%, signal=41%	9123/3939/6566/7416/8801/4709/9377/4697/509/1537/1329/1340/9551/1337/1345/518/2108/4715/7388/54205/4710/10131/521/3418/54704/7384/4191/81889/27089/55967/1349/80219/1743/4725/728294/4716/682/514/4706/7385/4729/5467/5163/10128/4728/4720/1327/4704/2109/6391/6389/6392/51241/513/517/4717/1351/2271/4694/4722/1737/51300/10476/4705/8050/4723/4713/4726/6390/28976/1350/9167/29796/3421/54539/116228/4695/539…
GHANDHI_DIRECT_IRRADIATION_UP	101	0.458532	1.6487	0.00234192	0.0149503	0.00956095	3254	tags=38%, list=17%, signal=31%	3914/26499/3918/11199/22943/23657/79669/26031/9076/4495/27113/5743/54997/9518/144455/4312/8795/5460/4493/8942/650/6374/4496/330/3976/338376/50486/5971/3576/7804/3624/56892/3589/5055/4314/3552/7779/10135
DUTERTRE_ESTRADIOL_RESPONSE_6HR_UP	222	0.407471	1.64892	0.00248139	0.0149503	0.00956095	4189	tags=47%, list=22%, signal=37%	771/51195/9536/2317/3860/7739/7869/26509/94122/8645/11145/374/54498/645/6510/990/6566/55034/79682/29128/9424/2288/4173/1869/51514/154141/8318/23541/4171/11057/22822/83879/3329/3732/55388/90381/9156/94121/7162/1111/5083/1138/29957/51659/7052/55806/23052/1303/3070/5111/3669/56915/10606/11169/8165/57475/10036/126382/11001/5932/7374/83990/8607/960/7516/2237/51388/4176/23212/158046/2618/7804/2444/9188…
REACTOME_MRNA_SPLICING	187	0.41566	1.64895	0.00246914	0.0149503	0.00956095	6263	tags=58%, list=33%, signal=39%	25804/5437/51639/6628/3185/6637/6626/6635/6636/10262/2963/10465/22827/1478/6634/29894/6632/6633/6631/9939/55660/5441/6627/8175/10921/51503/23658/8683/5093/5725/56259/10713/3183/4116/1665/5439/9092/3184/9343/55110/51692/5440/3191/11051/4904/25949/3181/10992/8106/8896/10285/84844/10236/5546/6429/57819/51690/22938/27238/51691/8189/23451/6629/3178/220988/23350/3192/10421/27258/27339/22916/9416/6428/1…
MOHANKUMAR_HOXA1_TARGETS_DN	163	0.424853	1.64898	0.00238663	0.0149503	0.00956095	1257	tags=22%, list=7%, signal=21%	4586/6286/57402/5268/3914/4680/4582/3918/9022/55765/6277/5349/7033/54854/80352/706/8437/79669/638/11343/2266/11005/2877/374/9518/79695/3248/3219/1824/3606/3321/1978/11057/301/26872/9111
REACTOME_BASE_EXCISION_REPAIR	44	0.526384	1.6491	0.00677201	0.0292404	0.0186997	5305	tags=61%, list=28%, signal=44%	57804/5423/5111/4350/4913/5984/23583/7374/11284/2237/55247/5427/6119/56655/5425/5426/5424/5982/328/10714/5985/7515/54936/3978/54107/10038/25913
JI_METASTASIS_REPRESSED_BY_STK11	26	0.591544	1.64984	0.0110865	0.0418026	0.0267335	1126	tags=38%, list=6%, signal=36%	84951/4680/6493/2150/374/9518/57210/1846/3693/100133941
REACTOME_REGULATION_OF_PTEN_STABILITY_AND_ACTIVITY	69	0.486327	1.64994	0.00226757	0.0149503	0.00956095	5370	tags=68%, list=28%, signal=49%	5721/5696/5698/5720/7979/5699/5719/5686/10213/7316/5707/5684/5710/2444/5706/5688/5702/5687/1457/5685/5713/5691/5704/5682/1460/5690/5714/5692/23608/5709/5715/5695/5693/207/10197/11060/5708/1459/5717/9491/10273/5700/5701/5683/6233/9861/23198
CAIRO_PML_TARGETS_BOUND_BY_MYC_UP	20	0.619759	1.64995	0.00423729	0.0211547	0.0135288	4083	tags=55%, list=22%, signal=43%	7083/3939/891/5757/83879/83939/993/586/8886/581/10591
BENPORATH_ES_CORE_NINE_CORRELATED	99	0.461661	1.65007	0.00233645	0.0149503	0.00956095	2999	tags=37%, list=16%, signal=32%	688/3159/2305/29842/4605/6662/51442/10553/4188/9603/1869/6659/2146/9319/9111/8543/3297/79733/1051/7004/7022/51513/2000/6664/11169/3148/5971/4794/2296/23028/6772/6749/54815/7468/811/1054/3659
REACTOME_RECOGNITION_OF_DNA_DAMAGE_BY_PCNA_CONTAINING_REPLICATION_COMPLEX	30	0.572782	1.65333	0.00449438	0.0217221	0.0138917	5267	tags=67%, list=28%, signal=48%	57804/51514/5111/5984/7316/5427/6119/56655/5425/56852/5426/5424/5982/10714/8451/5985/7320/54107/9978/6233
SMID_BREAST_CANCER_RELAPSE_IN_LUNG_UP	22	0.613708	1.65344	0.00659341	0.0290359	0.0185689	998	tags=36%, list=5%, signal=34%	3872/94025/5650/10874/5653/1515/4323/7136
COLINA_TARGETS_OF_4EBP1_AND_4EBP2	345	0.390829	1.65495	0.00254453	0.0149503	0.00956095	3327	tags=39%, list=18%, signal=33%	3557/51703/54443/4061/22974/6385/4071/3934/9123/64129/991/5347/7153/2305/1894/4751/26031/64065/9787/83451/2152/1212/57159/27346/332/10112/51203/891/9833/595/2635/4883/9636/890/8553/645/11004/11035/55723/3161/29127/10312/4257/29089/64108/55872/1356/81620/7272/83540/79589/81624/9700/9212/5792/10403/684/481/4860/2634/22822/283/5888/377677/6284/27293/5696/5698/64761/64105/6150/5445/7849/10039/115817/…
REACTOME_TRANSPORT_OF_BILE_SALTS_AND_ORGANIC_ACIDS_METAL_IONS_AND_AMINE_COMPOUNDS	85	0.476405	1.65698	0.00234192	0.0149503	0.00956095	2531	tags=25%, list=13%, signal=21%	55630/11254/9123/54716/284111/80736/5002/6581/6566/1356/23446/283375/6526/27173/57153/126969/84102/133418/9843/7780/861
CHEN_ETV5_TARGETS_TESTIS	24	0.603673	1.65882	0.00645161	0.0285461	0.0182557	2027	tags=33%, list=11%, signal=30%	4288/205/4171/83879/5888/4085/3070/1017
KEGG_DRUG_METABOLISM_OTHER_ENZYMES	51	0.512841	1.66022	0.00662252	0.0290818	0.0185983	2952	tags=31%, list=16%, signal=27%	978/54575/7498/7083/1577/7364/54658/8824/1890/54578/7378/3704/8833/3251/3615/79799
ZHENG_GLIOBLASTOMA_PLASTICITY_UP	238	0.406339	1.66092	0.00250627	0.0149503	0.00956095	2450	tags=39%, list=13%, signal=34%	8537/7476/54443/22974/6385/259173/991/5347/7153/7083/1894/6241/2118/57211/2152/259266/9133/8870/444/1164/1163/51090/332/127281/699/51203/9055/891/9833/595/5214/54997/6696/55143/6790/79180/24137/144455/445/29128/29127/1846/29089/7277/9768/4173/1356/81620/83540/79589/7368/1104/10635/9212/10403/81930/8318/10615/4171/10840/5888/4085/221035/83461/4001/11113/9156/8438/899/1848/2820/4324/79801/10733/104…
HANN_RESISTANCE_TO_BCL2_INHIBITOR_DN	46	0.525127	1.6612	0.00896861	0.0358131	0.022903	2682	tags=41%, list=14%, signal=36%	5645/5646/5644/6385/85415/8437/3303/54997/3315/445/157638/118881/57761/1056/5480/4255/5106/6641/9446
KOKKINAKIS_METHIONINE_DEPRIVATION_48HR_DN	61	0.50225	1.66291	0.0022779	0.0149503	0.00956095	3313	tags=48%, list=18%, signal=39%	4233/978/7083/332/10682/9212/10811/373156/3665/4831/7298/3065/3654/4350/7866/30833/124583/3489/4259/7150/994/1649/4830/6240/7378/1054/10654/25788/56474
TURASHVILI_BREAST_DUCTAL_CARCINOMA_VS_DUCTAL_NORMAL_DN	185	0.421026	1.66313	0.00248756	0.0149503	0.00956095	1378	tags=23%, list=7%, signal=22%	1308/3868/1830/23650/3914/3855/3918/3691/3872/4233/1001/3909/5650/10158/1999/4071/4316/7039/388115/2564/6662/3866/55240/1515/2568/858/3861/3158/26298/51304/3852/4257/2628/23764/8795/7205/1356/5284/301/642273/51312/3854/1956
WALLACE_JAK2_TARGETS_UP	22	0.617575	1.66385	0.00659341	0.0290359	0.0185689	3721	tags=55%, list=20%, signal=44%	5646/2051/5058/8824/11161/3835/4259/994/10465/5426/5439/6182
REACTOME_NEURODEGENERATIVE_DISEASES	22	0.617678	1.66413	0.00659341	0.0290359	0.0185689	2734	tags=45%, list=14%, signal=39%	823/824/995/4001/831/4000/826/5052/994/993
SESTO_RESPONSE_TO_UV_C4	20	0.62613	1.66691	0.00423729	0.0211547	0.0135288	3809	tags=50%, list=20%, signal=40%	8581/928/9636/7298/1606/6626/5550/8683/7132/10212
REACTOME_ACYL_CHAIN_REMODELLING_OF_PE	29	0.581142	1.66702	0.00666667	0.0290841	0.0185998	1115	tags=41%, list=6%, signal=39%	254531/54979/129642/79887/11145/8399/5920/64600/255189/22925/154141/5319
HEIDENBLAD_AMPLICON_12P11_12_DN	21	0.622439	1.66756	0.00641026	0.028444	0.0181904	2587	tags=38%, list=14%, signal=33%	50853/3960/79098/2568/161291/9144/80221/54433
LIU_CDX2_TARGETS_UP	34	0.551366	1.66787	0.00662252	0.0290818	0.0185983	3677	tags=62%, list=19%, signal=50%	688/10103/10551/4583/54474/4883/5225/7429/9314/4069/2172/182/474/7421/9843/6476/290/1044/6343/1789/2169
MOOTHA_MITOCHONDRIA	446	0.38655	1.66797	0.00269542	0.0151593	0.00969462	4427	tags=40%, list=23%, signal=31%	3958/706/638/2064/5834/205/26504/3158/6461/598/51205/2628/578/3336/7263/1535/5831/1468/5319/4357/4151/3329/51312/5464/1159/80777/60488/3098/2820/11313/4831/7417/65993/841/4522/22904/23597/4709/9377/29088/26292/10651/4697/28998/509/1537/1632/1329/1340/9551/1337/1345/51582/8743/5447/6183/5580/518/51642/2108/7388/54205/4710/6742/1890/11222/79590/65003/10440/63875/521/5106/79751/3418/1716/51067/10452…
MOOTHA_PGC	417	0.38908	1.66809	0.0027248	0.0152015	0.00972164	3653	tags=36%, list=19%, signal=29%	4586/8000/29984/3934/30001/57016/64129/2305/1294/6241/3939/1164/6692/5214/6696/9518/5129/54541/6714/8673/2597/10312/6574/3336/8694/51012/5230/5315/2023/481/22822/3329/11261/6284/4041/7167/2987/60370/2101/30850/6319/7137/55505/1848/760/65993/9517/26355/7422/440026/6303/5699/5833/84727/4709/7341/29088/80256/10651/10856/28998/509/11344/476/1537/1329/51719/8165/1337/51582/5496/6183/5686/1312/9238/271…
VERRECCHIA_EARLY_RESPONSE_TO_TGFB1	54	0.512123	1.66917	0.00672646	0.0292404	0.0186997	2986	tags=44%, list=16%, signal=38%	3675/3728/8754/6934/1855/4323/5327/389/3486/5058/65108/3693/2049/4831/9266/5829/2335/7791/4830/960/390/966/682/4314
SMID_BREAST_CANCER_RELAPSE_IN_BRAIN_UP	39	0.54507	1.67236	0.00681818	0.0292522	0.0187072	1378	tags=33%, list=7%, signal=31%	3868/23650/1001/4316/1063/8645/27242/51442/3833/3613/1356/55388/1956
BURTON_ADIPOGENESIS_5	113	0.455191	1.67345	0.002331	0.0149503	0.00956095	3781	tags=48%, list=20%, signal=38%	3099/5468/27346/6510/10140/51012/11261/57462/2101/5464/6888/65993/2872/415116/404550/29088/5597/10651/1537/1337/5447/5686/4259/7388/10134/10440/26608/10452/84833/4191/1892/5245/10960/2997/1622/4716/100287932/10130/10105/2821/10063/4706/55177/5682/80273/8443/64225/2109/6392/204/6182/84522/57017/2230
REACTOME_G2_M_DNA_DAMAGE_CHECKPOINT	61	0.505461	1.67354	0.0022779	0.0149503	0.00956095	4331	tags=44%, list=23%, signal=34%	2810/983/891/7534/995/116028/9156/1111/7341/580/5984/5932/83990/83695/5883/79184/6119/7468/7529/7465/5982/641/11200/5985/165918/7532/1763
REACTOME_APOPTOTIC_CLEAVAGE_OF_CELLULAR_PROTEINS	38	0.547976	1.67395	0.00684932	0.0292522	0.0187072	2509	tags=47%, list=13%, signal=41%	1830/5339/1829/999/5317/9414/100506658/8428/4001/4000/839/840/841/7082/5580/1832/10134/51765
REACTOME_SUMOYLATION_OF_DNA_REPLICATION_PROTEINS	45	0.531676	1.67531	0.00680272	0.0292404	0.0186997	2995	tags=36%, list=16%, signal=30%	7153/332/55143/6790/9212/10401/3619/7341/5111/55706/7150/79023/7329/9688/5905/6612
SENGUPTA_NASOPHARYNGEAL_CARCINOMA_WITH_LMP1_DN	163	0.431731	1.67568	0.00238663	0.0149503	0.00956095	1482	tags=28%, list=8%, signal=26%	6286/10232/3855/64073/4680/113146/8796/6699/6707/1382/79148/1728/10158/284340/11254/10562/124220/3934/4316/6317/653145/2706/29842/3038/64699/1672/388115/6698/5266/8842/2568/3861/7348/6783/445/80005/79589/13/3851/5284/6318/93099/3854/629/6374/135228
KIM_WT1_TARGETS_UP	216	0.416603	1.67627	0.00251889	0.0149503	0.00956095	2783	tags=35%, list=15%, signal=30%	3914/2810/3872/1969/7262/6699/8091/3159/6385/4071/6590/3775/79669/51330/5329/2152/8870/6662/2274/2069/8061/374/8553/6461/4088/9569/23764/6574/3157/5584/23186/23268/4643/481/54442/5099/3556/26030/65124/80271/7162/11322/29775/760/677/60/11177/7414/4664/65981/7791/3976/116984/8507/22800/6482/5373/5744/5580/10221/4791/5971/5606/960/4794/2296/1595/2297/3576/390/9592/3566/3460/376267/200424/3624
KIM_BIPOLAR_DISORDER_OLIGODENDROCYTE_DENSITY_CORR_DN	85	0.481983	1.67638	0.00234192	0.0149503	0.00956095	2291	tags=29%, list=12%, signal=26%	8796/5652/1969/4320/3955/652/7153/3291/6820/1562/10317/7481/222/113878/2863/55503/1946/5319/3556/3972/3814/22904/5373/7975/1045
MOOTHA_HUMAN_MITODB_6_2002	428	0.389258	1.6767	0.00268817	0.0151551	0.00969191	5365	tags=48%, list=28%, signal=35%	51703/706/7083/3303/205/9518/3158/7295/598/51205/2628/578/3336/7263/1535/5831/1468/4357/3329/51312/1159/80777/2875/60488/3098/2820/11313/7417/65993/841/4522/22904/23597/4709/9377/25996/29088/1591/4697/28998/509/1537/1632/1329/1340/8165/9551/1337/1345/2181/51582/6183/518/51642/2108/7388/54205/4710/6742/79590/65003/10131/10440/63875/521/5106/3418/1716/10452/54704/211/2356/7384/4191/1892/35/2746/980…
REACTOME_TRNA_AMINOACYLATION	24	0.610187	1.67672	0.00645161	0.0285461	0.0182557	4856	tags=58%, list=26%, signal=43%	5464/55157/55699/10056/27068/51067/7965/124454/80222/9255/23438/57176/10352/2193
IRITANI_MAD1_TARGETS_DN	40	0.543874	1.67714	0.00683371	0.0292522	0.0187072	3646	tags=50%, list=19%, signal=40%	983/6566/445/5464/79733/4831/79077/84326/191/9086/7384/2091/54663/2821/6141/6137/5424/6136/328/51692
FUJII_YBX1_TARGETS_UP	42	0.541295	1.67723	0.00900901	0.0358715	0.0229404	1338	tags=31%, list=7%, signal=29%	4582/9022/6277/53836/9123/822/79983/634/5920/9961/3965/629/84958
SANSOM_APC_MYC_TARGETS	233	0.410241	1.67747	0.00246914	0.0149503	0.00956095	4701	tags=42%, list=25%, signal=32%	6382/3955/81786/7869/51330/2305/1718/89958/26873/84433/595/85014/598/7855/1058/23268/6659/6928/7086/51278/90381/5698/26227/471/84958/4282/4522/90417/84823/284403/56889/5829/644815/9136/23218/55591/7469/1605/6636/4791/79709/1045/347734/4830/1316/84722/1981/55611/79090/8476/9894/4176/10565/7037/55074/3615/7760/5886/10280/51013/5426/6599/6472/29941/4598/64225/28989/3326/55651/121642/4435/9274/10575/…
PID_P73PATHWAY	79	0.484301	1.67829	0.0022779	0.0149503	0.00956095	3658	tags=39%, list=19%, signal=32%	2810/6273/5347/983/27113/699/891/9518/890/578/10413/9540/1021/5888/3556/5371/3297/1111/5970/6667/1017/23327/7161/8626/3566/9184/9191/4720/835/54894/1026
LEE_LIVER_CANCER_ACOX1_UP	64	0.502269	1.67963	0.00225734	0.0149503	0.00956095	2381	tags=39%, list=13%, signal=34%	1510/1728/3856/4061/302/6590/3934/1476/1672/6698/10553/6566/8407/5327/6574/54810/100133941/11057/325/3065/3959/3223/5359/873/3484
HAN_SATB1_TARGETS_DN	380	0.394912	1.67999	0.00263158	0.0150912	0.00965105	2099	tags=24%, list=11%, signal=22%	6286/7031/3914/5645/5753/3783/3918/3691/6273/1364/10551/771/8091/6819/1382/6275/7476/3159/25803/3675/5644/266977/124220/3728/2065/5002/9121/7851/3655/2064/10276/10205/1366/57211/50848/6713/9235/794/5266/5328/56937/51090/6934/205/7045/374/8553/6566/1855/5327/1040/6676/10653/4091/5916/79720/8751/24139/6659/11148/684/8644/23541/2634/79628/9289/3887/4862/5698/629/7923/1956/51274/55215/55286/4000/2294…
REACTOME_APOPTOTIC_EXECUTION_PHASE	46	0.531271	1.68064	0.00672646	0.0292404	0.0186997	2509	tags=41%, list=13%, signal=36%	1830/5339/1829/999/5317/9414/100506658/8428/4001/4000/839/840/841/3148/7082/5580/1832/10134/51765
SARTIPY_NORMAL_AT_INSULIN_RESISTANCE_UP	29	0.585915	1.68071	0.00666667	0.0290841	0.0185998	3393	tags=45%, list=18%, signal=37%	6513/9536/2069/8061/205/8553/22822/1848/9592/51602/121053/3156/10678
REACTOME_INTERCONVERSION_OF_NUCLEOTIDE_DI_AND_TRIPHOSPHATES	29	0.586385	1.68206	0.00666667	0.0290841	0.0185998	4516	tags=59%, list=24%, signal=45%	6241/205/7295/2987/1841/4831/7298/79077/51727/4830/6240/56474/204/1635/4832/1503/2936
NIKOLSKY_BREAST_CANCER_1Q21_AMPLICON	37	0.552863	1.68298	0.00678733	0.0292404	0.0186997	3544	tags=54%, list=19%, signal=44%	4582/1944/1945/1942/1163/55974/8751/51043/2224/10712/23623/127579/80308/200185/10654/4580/149095/65005/6464/10067
ALFANO_MYC_TARGETS	232	0.413328	1.68366	0.0025	0.0149503	0.00956095	3112	tags=36%, list=16%, signal=31%	3783/6281/4061/9957/6385/6382/6590/133/652/5339/11343/3655/5329/375790/5834/4605/6662/5768/2041/5328/6934/10627/205/23204/6566/9961/1717/1500/2288/7504/7205/6574/5205/1104/23170/5831/10263/481/4860/3693/301/22822/9144/23645/5782/5050/10733/7052/10938/5829/7414/26292/10606/11079/8165/4681/23173/4861/6941/10131/8607/3484/10092/26574/10452/3927/3225/6632/9188/1743/10969/27249/966/26585/4528/10105/11…
PEDERSEN_METASTASIS_BY_ERBB2_ISOFORM_3	18	0.641284	1.68421	0.0103734	0.0398873	0.0255086	1944	tags=44%, list=10%, signal=40%	4008/2150/79170/5318/23529/1956/81671/8507
FISCHER_DIRECT_P53_TARGETS_META_ANALYSIS	304	0.402312	1.68427	0.00243309	0.0149503	0.00956095	2700	tags=30%, list=14%, signal=26%	5268/2810/3783/6273/1969/3856/3675/1947/53836/7869/1294/4583/64787/84612/83959/8870/3866/27113/307/9518/8553/8797/144455/4088/598/3280/9249/8795/7205/23513/9618/24139/157638/8915/10413/7005/9540/780/9610/6548/54884/3732/51278/25987/5366/84958/5371/134147/5437/127707/283149/116238/4000/80271/7098/55362/84280/51513/51474/23612/85461/1606/128414/57552/284252/1907/5639/9538/3976/5111/1056/5912/10904/…
BOYAULT_LIVER_CANCER_SUBCLASS_G1_UP	113	0.458304	1.6849	0.002331	0.0149503	0.00956095	2988	tags=35%, list=16%, signal=30%	57402/3898/27134/8612/4320/6768/1366/50848/6662/6692/745/1525/79170/2050/9725/10653/55930/780/9289/4000/399664/10765/79026/9580/51635/3993/6223/5362/7718/171586/9448/30851/9887/51133/9654/29911/3703/9019/5603/9939
DACOSTA_UV_RESPONSE_VIA_ERCC3_UP	308	0.402264	1.68533	0.00243902	0.0149503	0.00956095	4396	tags=43%, list=23%, signal=33%	7262/4061/2950/5331/7083/3303/2064/1212/1942/4605/9088/6535/1515/226/9636/6510/10555/8744/990/124222/10140/4192/10312/578/7277/4173/1978/435/1869/7263/8694/81620/9260/9540/4860/4597/6284/6697/5366/5499/6150/80777/5050/7162/6303/23401/7298/5970/5699/10581/898/6626/5111/1017/1632/871/901/6495/14/6737/3489/79143/6183/6184/7844/8793/7009/3418/4794/2237/997/211/7384/10573/5883/2746/6415/29901/5127/572…
FRASOR_TAMOXIFEN_RESPONSE_UP	49	0.522326	1.68702	0.00434783	0.0215682	0.0137932	3403	tags=43%, list=18%, signal=35%	9022/3860/1999/6382/7739/2122/8870/1948/5129/8553/7534/9289/22941/960/3927/6715/7108/6576/4436/10678/5998
DEURIG_T_CELL_PROLYMPHOCYTIC_LEUKEMIA_UP	335	0.399483	1.6874	0.00253807	0.0149503	0.00956095	3264	tags=34%, list=17%, signal=28%	2810/3783/55630/22943/80201/5349/54575/3875/7498/57111/23555/54845/4288/64423/2065/9322/1894/250/11226/80162/10205/7264/54866/9743/9133/8870/27346/6934/891/2050/9768/4173/65108/1978/8694/23513/1495/28969/9314/22925/9780/2023/780/481/7086/6652/4171/11057/8857/240/9319/1663/23645/57175/8767/6150/7923/5371/10164/23246/2820/51097/4831/1358/284403/54892/2335/8531/10419/9650/29088/10434/1591/3145/3959/…
WIEDERSCHAIN_TARGETS_OF_BMI1_AND_PCGF2	57	0.515926	1.68819	0.00678733	0.0292404	0.0186997	1335	tags=33%, list=7%, signal=31%	6273/29984/3675/144347/4316/133/3955/26509/56262/10276/22885/5329/9076/2150/8061/595/5327/1021/100507436
JIANG_HYPOXIA_CANCER	58	0.514225	1.69121	0.00447427	0.0217221	0.0138917	2816	tags=48%, list=15%, signal=41%	1063/7050/9636/83442/24137/481/55092/8801/65993/58472/7052/54892/84650/10094/10362/2335/1907/10419/54682/57222/550/79709/5236/994/10092/27230/8985/7329
PID_AURORA_A_PATHWAY	31	0.580403	1.69205	0.0045045	0.0217221	0.0138917	2844	tags=42%, list=15%, signal=36%	22974/9787/332/6790/84962/5058/1058/9212/10460/994/5901/54998/9793
WANG_TUMOR_INVASIVENESS_UP	355	0.399556	1.69243	0.00258398	0.0149503	0.00956095	5220	tags=53%, list=28%, signal=39%	57402/3880/6277/1382/302/51316/83715/25833/7264/7430/1163/10112/7045/595/9232/3832/2597/9748/5058/9414/2288/118429/3336/3157/3851/5315/2023/26136/4860/2146/57619/7086/83461/10072/1265/64105/6132/51107/9334/7417/22913/10460/5194/10204/25824/10938/8906/10094/10581/7414/2335/10383/10535/8894/5111/10410/22800/10928/476/10808/25994/3148/6184/56888/10963/84661/3069/3182/8540/521/22948/6227/8667/8662/10…
GARCIA_TARGETS_OF_FLI1_AND_DAX1_DN	158	0.436707	1.69338	0.00233645	0.0149503	0.00956095	3159	tags=35%, list=17%, signal=29%	11033/23657/64423/6241/144100/4605/113130/4495/11130/84842/990/5757/51514/1104/84798/1468/10008/55466/55388/4001/80777/79019/1111/119392/51659/7298/9136/157570/898/1017/1404/51287/51642/6941/79590/65003/163071/27166/2237/55055/201254/9894/115708/993/11140/5688/55661/6921/6631/22934/51053/54927/573/7112/4869
REACTOME_EPH_EPHRIN_SIGNALING	92	0.476256	1.69407	0.00228311	0.0149503	0.00956095	4275	tags=57%, list=23%, signal=44%	1969/79784/1947/1944/25791/2051/1945/1212/1942/2041/1948/10627/2050/6714/103910/5058/1943/1946/1072/5879/2049/5663/51107/60/7525/10094/102/10552/10095/2043/8997/10092/55851/8976/10109/71/5747/10096/3984/1175/387/64283/10093/163/7410/5921/998/1211/5062/3265/10097/4627
REACTOME_LAGGING_STRAND_SYNTHESIS	20	0.636442	1.69437	0.00423729	0.0211547	0.0135288	4554	tags=70%, list=24%, signal=53%	57804/5111/5984/2237/6119/5558/5425/5424/5982/10714/5985/23649/1763/3978
QI_HYPOXIA_TARGETS_OF_HIF1A_AND_FOXA2	33	0.566171	1.69475	0.0043573	0.0215857	0.0138044	2806	tags=42%, list=15%, signal=36%	9052/9123/2150/6624/81/598/1500/11221/3098/2011/5496/55818/6415/51586
REACTOME_ANTIGEN_PRESENTATION:_FOLDING_ASSEMBLY_AND_PEPTIDE_LOADING_OF_CLASS_I_MHC	25	0.614683	1.69777	0.00663717	0.0290841	0.0185998	5200	tags=64%, list=28%, signal=46%	6890/2923/10134/6891/64167/3135/811/3134/567/3106/6892/3107/3309/3105/821/6396
BENPORATH_MYC_TARGETS_WITH_EBOX	220	0.420474	1.69856	0.00246914	0.0149503	0.00956095	3991	tags=42%, list=21%, signal=33%	1048/4582/4233/4241/652/2950/5347/2305/3291/1476/8061/27113/891/595/10682/9572/7295/3613/2597/10312/3280/5757/4257/4173/1869/1104/2023/83596/3329/26986/9144/4000/5423/841/60/84823/602/3145/3320/6573/3669/10606/7866/6778/4913/8165/7150/6223/1207/378/4830/9351/3661/7884/2356/5684/375/4176/5245/9804/4691/6173/1622/7037/4610/8878/6715/682/71/10245/6157/5425/10428/3688/10280/7465/3110/4817/5510/5321/6…
NIKOLSKY_BREAST_CANCER_11Q12_Q14_AMPLICON	155	0.440246	1.69904	0.00235294	0.0149503	0.00956095	3165	tags=33%, list=17%, signal=28%	26579/55107/726/192134/2950/6712/54961/65987/595/78999/57804/57010/3177/2017/7481/54843/1717/222/5058/254552/79703/80194/10263/23529/9610/91703/10008/80168/25987/5499/10072/57175/9986/283209/22941/57571/8772/219927/871/65003/1207/9600/9633/5883/55191/25855/26007/10897/6188/79053/81876
PID_ECADHERIN_KERATINOCYTE_PATHWAY	21	0.634318	1.69938	0.0042735	0.02129	0.0136153	1856	tags=52%, list=10%, signal=47%	3728/7408/999/6714/84962/1500/1495/5879/1956/342184/7791
BOYAULT_LIVER_CANCER_SUBCLASS_G123_UP	45	0.539602	1.70029	0.00453515	0.0217449	0.0139062	4135	tags=62%, list=22%, signal=49%	7286/9133/10112/5584/7429/9837/100133941/5445/6628/10051/6635/580/29028/5984/27101/6632/29901/7203/4076/8491/7112/65005/6464/81875/23185/3838/57645/5935
LEE_LIVER_CANCER_MYC_UP	53	0.524215	1.70372	0.00665188	0.0290841	0.0185998	3372	tags=49%, list=18%, signal=40%	1510/8581/4061/3934/983/1476/10553/10112/51203/2222/5327/3157/83461/353/5899/56034/4259/1592/6641/6158/6229/71/6181/25873/6217/6136
REACTOME_TRANSCRIPTIONAL_REGULATION_BY_THE_AP_2_TFAP2_FAMILY_OF_TRANSCRIPTION_FACTORS	38	0.557733	1.70376	0.00228311	0.0149503	0.00956095	2101	tags=42%, list=11%, signal=37%	7020/7039/93659/2064/4605/163732/94115/1082/3329/1956/7022/7422/10765/284252/7341/29028
REACTOME_AFLATOXIN_ACTIVATION_AND_DETOXIFICATION	18	0.648777	1.70388	0.00829876	0.0337724	0.021598	1183	tags=39%, list=6%, signal=36%	22977/1577/95/4257/124975/91703/4258
SESTO_RESPONSE_TO_UV_C8	69	0.502282	1.70407	0.00226757	0.0149503	0.00956095	3434	tags=45%, list=18%, signal=37%	1308/6513/3909/2317/3675/2706/5214/2222/1495/5792/5445/3098/7422/6788/10512/8743/2043/5796/5236/5530/7058/9804/3566/8226/10797/3705/23191/10610/9588/8140/10972
REACTOME_CELL_CELL_JUNCTION_ORGANIZATION	64	0.509681	1.70441	0.00225734	0.0149503	0.00956095	1923	tags=36%, list=10%, signal=32%	51208/1001/81607/1364/3728/1366/84612/50848/9076/999/137075/1015/92359/1500/5584/1495/9069/283/10207/5819/60/56288/5818
VERRECCHIA_RESPONSE_TO_TGFB1_C1	19	0.645857	1.70571	0.00630252	0.0280459	0.0179358	2937	tags=53%, list=16%, signal=44%	3675/8754/6934/5327/3486/5058/2049/4830/960/682
LUI_TARGETS_OF_PAX8_PPARG_FUSION	33	0.570144	1.70664	0.00217865	0.0149503	0.00956095	3928	tags=48%, list=21%, signal=38%	6385/1366/10477/6187/10221/7009/5901/51614/2091/3135/6141/6142/567/3326/10430/57142
REACTOME_INHIBITION_OF_THE_PROTEOLYTIC_ACTIVITY_OF_APC_C_REQUIRED_FOR_THE_ONSET_OF_ANAPHASE_BY_MITOTIC_SPINDLE_CHECKPOINT_COMPONENTS	20	0.641135	1.70686	0.00423729	0.0211547	0.0135288	1200	tags=20%, list=6%, signal=19%	11065/991/701/4085
AFFAR_YY1_TARGETS_DN	248	0.41743	1.70686	0.0025	0.0149503	0.00956095	2285	tags=32%, list=12%, signal=29%	2707/81607/7103/4288/3949/79983/5002/5347/7153/1063/7083/2305/1718/259266/9133/6713/332/10112/6307/699/9055/891/7045/6696/6790/890/11004/990/2222/3832/64151/3161/54101/29128/8986/29127/1062/701/4173/3157/81620/7272/81624/1058/10635/9212/995/1180/79071/5319/122704/10615/4085/26872/83461/4001/9319/3417/9156/6319/4069/7137/8600/79801/10733/4322/1396/83463/8549/57761/3070/2224/3835/63922/50814/5984/3…
MCBRYAN_PUBERTAL_BREAST_6_7WK_DN	76	0.493712	1.70693	0.00221729	0.0149503	0.00956095	2523	tags=39%, list=13%, signal=34%	8581/11065/4288/6382/6590/991/51330/983/2152/891/7050/374/9572/9232/26298/2059/7368/83461/1848/10487/3437/284996/3654/3835/3148/1832/12/54751/6296/84833
REACTOME_RESOLUTION_OF_AP_SITES_VIA_THE_MULTIPLE_NUCLEOTIDE_PATCH_REPLACEMENT_PATHWAY	25	0.618026	1.70701	0.00442478	0.0215857	0.0138044	5210	tags=76%, list=28%, signal=55%	57804/5423/5111/5984/2237/5427/6119/56655/5425/5426/5424/5982/328/10714/5985/54936/3978/54107/10038
KIM_MYCL1_AMPLIFICATION_TARGETS_DN	19	0.646667	1.70785	0.00630252	0.0280459	0.0179358	3078	tags=47%, list=16%, signal=40%	54443/79977/85415/81839/79026/861/54918/4893/55075
HSIAO_HOUSEKEEPING_GENES	383	0.400187	1.70905	0.00258398	0.0149503	0.00956095	4639	tags=49%, list=25%, signal=37%	3958/11065/6281/302/2950/1476/3939/7430/1192/9168/6535/226/7534/7295/23204/2597/8407/3315/5757/5355/2288/824/311/9618/334/5230/1072/2023/5879/4258/3329/26986/471/5720/831/6132/8824/5663/5478/7417/60/3185/10487/7114/3065/3654/826/5269/10410/3320/3669/4697/509/11079/1340/1337/14/1345/8826/805/8887/6187/1312/518/6223/12/5052/7388/10134/378/7009/6227/829/6159/7316/3927/6158/375/1892/4738/8519/55967/9…
KAUFFMANN_DNA_REPAIR_GENES	224	0.420963	1.70947	0.002457	0.0149503	0.00956095	5509	tags=48%, list=29%, signal=35%	7153/6241/10519/57804/9232/2175/10635/9540/9401/5888/10721/4085/143/9156/8438/10039/7979/1111/5423/7341/1022/5111/10856/4350/10051/4913/5984/7011/10036/3148/23583/7150/5932/7374/4331/4255/83990/11284/7516/2237/6240/7161/8626/55247/4521/8379/5883/5427/6749/7329/6119/7520/56655/146956/7517/2177/5425/5886/56852/4436/5426/25788/5424/80198/5982/201299/55120/328/10714/1026/121642/641/1454/11200/5985/21…
AZARE_NEOPLASTIC_TRANSFORMATION_BY_STAT3_DN	18	0.65134	1.71061	0.00622407	0.0278829	0.0178316	1776	tags=56%, list=9%, signal=50%	9052/55057/978/9536/3860/51316/5493/6364/55806/7035
GRAHAM_CML_QUIESCENT_VS_NORMAL_QUIESCENT_UP	89	0.482877	1.7111	0.00229358	0.0149503	0.00956095	1714	tags=37%, list=9%, signal=34%	3557/55165/991/7153/1063/7083/983/6241/9787/9133/51203/9055/9833/645/11130/3832/79682/29127/7504/9768/7263/9837/79071/2146/4357/1033/56992/6364/4000/1111/760/11177/51032
WANG_BARRETTS_ESOPHAGUS_DN	25	0.620324	1.71336	0.00442478	0.0215857	0.0138044	1498	tags=40%, list=8%, signal=37%	688/6707/5650/5653/5017/3728/1992/5355/8428/2013
KARAKAS_TGFB1_SIGNALING	19	0.649227	1.7146	0.00630252	0.0280459	0.0179358	1951	tags=37%, list=10%, signal=33%	8581/5347/332/699/1474/2335/3320
REACTOME_EPH_EPHRIN_MEDIATED_REPULSION_OF_CELLS	51	0.529665	1.71468	0.00441501	0.0215857	0.0138044	1791	tags=39%, list=9%, signal=36%	1969/1947/1944/2051/1945/1212/1942/2041/1948/2050/6714/1943/1946/5879/2049/5663/51107/60/7525/102
BURTON_ADIPOGENESIS_PEAK_AT_16HR	41	0.55792	1.71522	0.00458716	0.0218276	0.0139591	4179	tags=56%, list=22%, signal=44%	3159/1893/6241/990/55723/445/4173/83879/5888/3070/7866/3148/12/133418/2237/4176/9188/63901/5424/4676/283871/4175/23649
BOWIE_RESPONSE_TO_TAMOXIFEN	17	0.660034	1.71525	0.0125261	0.0457851	0.0292803	4182	tags=82%, list=22%, signal=64%	3429/9636/4939/2537/3665/3430/4599/3437/8519/6772/3659/3433/10379/3434
BIOCARTA_MCM_PATHWAY	18	0.653131	1.71532	0.00622407	0.0278829	0.0178316	5027	tags=83%, list=27%, signal=61%	990/4173/81620/4171/23594/898/1017/4254/4176/4999/4998/4175/5000/4174/4172
KEGG_PENTOSE_PHOSPHATE_PATHWAY	26	0.615135	1.71563	0.00443459	0.0215857	0.0138044	3802	tags=54%, list=20%, signal=43%	5214/226/7086/2203/6888/6120/230/5634/5236/51071/22934/2821/5211/55276
REACTOME_RHO_GTPASE_EFFECTORS	263	0.417874	1.71646	0.00251256	0.0149503	0.00956095	3587	tags=40%, list=19%, signal=33%	2810/128239/29984/79784/85415/991/5347/1063/332/699/9055/999/84790/55143/7534/11130/11004/9928/6714/1855/2017/103910/79682/389/5058/1062/57082/701/7277/1495/83540/81624/147841/1535/1058/9212/1072/10403/81930/5879/1729/995/10811/4085/11113/54820/64105/5595/79019/151648/55920/60/5590/3619/10094/6242/9735/10383/220134/54821/114822/10552/2491/10095/151246/8826/5580/79023/147179/55839/5586/1730/55055/…
CAFFAREL_RESPONSE_TO_THC_DN	31	0.588969	1.71702	0.0045045	0.0217221	0.0138917	2980	tags=48%, list=16%, signal=41%	983/6241/10755/10682/890/11130/1717/29128/9768/4860/10808/1595/203068/5055/10105
REACTOME_TP53_REGULATES_TRANSCRIPTION_OF_DEATH_RECEPTORS_AND_LIGANDS	12	0.728594	1.71733	0.00842105	0.0341525	0.0218411	3104	tags=67%, list=16%, signal=56%	8797/3486/8795/8793/7161/8626/124446/7159
HOFMANN_MYELODYSPLASTIC_SYNDROM_RISK_UP	23	0.631766	1.71736	0.00219298	0.0149503	0.00956095	1078	tags=39%, list=6%, signal=37%	9052/7103/7083/7851/8870/928/595/9518/10263
WEIGEL_OXIDATIVE_STRESS_BY_TBH_AND_H2O2	35	0.570218	1.71915	0.00453515	0.0217449	0.0139062	1856	tags=37%, list=10%, signal=34%	3691/4320/652/5768/10653/578/824/1495/995/3693/60/3065/7791
MARKS_ACETYLATED_NON_HISTONE_PROTEINS	15	0.680143	1.71947	0.0102881	0.0395917	0.0253195	1951	tags=27%, list=10%, signal=24%	3159/1869/5970/3320
REACTOME_PCNA_DEPENDENT_LONG_PATCH_BASE_EXCISION_REPAIR	21	0.642774	1.72203	0.00213675	0.0149503	0.00956095	3919	tags=71%, list=21%, signal=57%	57804/5423/5111/5984/2237/5427/6119/56655/5425/5426/5424/5982/328/10714/5985
UROSEVIC_RESPONSE_TO_IMIQUIMOD	20	0.647451	1.72368	0.00423729	0.0211547	0.0135288	2847	tags=60%, list=15%, signal=51%	8638/9636/5920/4939/2537/3665/3430/4599/3669/8519/6772/6373
TONKS_TARGETS_OF_RUNX1_RUNX1T1_FUSION_MONOCYTE_UP	201	0.432734	1.72391	0.00252525	0.0149503	0.00956095	4255	tags=52%, list=23%, signal=41%	3783/10170/7138/28231/2317/4061/4071/26509/26472/745/6934/5214/9518/9636/6566/2063/3315/2059/4312/3965/26010/7205/6574/3336/1978/28969/6659/334/8644/9540/780/6652/6548/3329/9319/60488/1848/6526/64795/4599/4496/2843/9136/7035/57761/10539/10561/1605/7866/84908/5358/50486/55353/25907/7374/30846/63875/4830/521/10964/2131/8662/55686/201254/4191/1892/5427/81892/10969/3624/54815/2935/813/4706/6627/8886/…
REACTOME_APC_CDC20_MEDIATED_DEGRADATION_OF_NEK2A	25	0.62421	1.72409	0.00442478	0.0215857	0.0138044	1200	tags=20%, list=6%, signal=19%	11065/991/4751/701/4085
REACTOME_DECTIN_1_MEDIATED_NONCANONICAL_NF_KB_SIGNALING	62	0.517898	1.72497	0.00225225	0.0149503	0.00956095	5370	tags=71%, list=28%, signal=51%	5721/5696/5698/5720/7979/5970/5699/5719/5686/4791/5971/10213/7316/5707/5684/5710/5706/5688/5702/5687/5685/5713/5691/5704/5682/5690/5714/5692/5709/5715/5695/5693/10197/9040/5708/5717/9491/5700/5701/5683/6233/9861/9039/23198
ISSAEVA_MLL2_TARGETS	56	0.527214	1.72508	0.00451467	0.0217449	0.0139062	1724	tags=39%, list=9%, signal=36%	23650/3914/3872/22943/1999/7869/9121/4907/5328/928/4883/5493/8407/3606/9414/4091/4017/9289/5099/112464/1396/79026
REACTOME_TRANSCRIPTIONAL_REGULATION_BY_RUNX2	119	0.465363	1.72562	0.00235294	0.0149503	0.00956095	4921	tags=55%, list=26%, signal=41%	3958/983/3549/6662/891/595/6714/4488/3280/4091/10413/5721/57154/5696/5698/2101/5720/5595/650/7979/4322/7525/5699/5719/5686/10213/7316/861/5707/5684/11059/5710/6772/5706/5688/23314/5702/5687/5685/5713/5691/5704/5682/860/1277/1026/5690/7291/5714/581/5692/5709/5715/5695/2736/5693/207/10197/5708/5717/9491/865/10273/2932/5700/5701
SIMBULAN_UV_RESPONSE_NORMAL_DN	33	0.576962	1.72705	0.00217865	0.0149503	0.00956095	2006	tags=39%, list=11%, signal=35%	3691/5339/3655/2886/3397/999/22822/1956/899/7422/79026/8507/1849
LIM_MAMMARY_LUMINAL_MATURE_UP	107	0.475986	1.72745	0.00229885	0.0149503	0.00956095	2447	tags=36%, list=13%, signal=31%	54869/10103/81607/150696/6690/79083/25803/2582/221/158158/80736/5002/9121/3291/6820/92840/7477/3158/222/10538/784/154141/26027/11221/55502/10298/26030/256329/8600/7052/149466/7474/352909/79885/6545/3169/55890/27324
KEGG_P53_SIGNALING_PATHWAY	68	0.511903	1.72771	0.00228833	0.0149503	0.00956095	2615	tags=40%, list=14%, signal=34%	5268/2810/983/64065/6241/9133/55240/27113/891/595/3486/8795/9540/1021/3732/5366/51512/1111/841/898/9538/1017/901/54205/7161/64326/51246
KEGG_HUNTINGTONS_DISEASE	171	0.443543	1.72874	0.00245098	0.0149503	0.00956095	5346	tags=53%, list=28%, signal=38%	5468/125965/90993/5331/146754/1212/27113/7416/23186/84699/55567/5437/7417/841/7052/3065/4709/9377/148327/6667/4697/509/1537/1329/1340/1337/1345/518/4715/7388/54205/4710/7384/27089/1349/4725/4716/5978/514/5441/4706/6874/7385/292/4729/1175/4728/4720/5439/1327/4704/6391/6389/10488/6392/163/5440/581/513/517/4717/1351/4694/4722/1211/10476/4705/4723/4713/4726/6390/1173/2902/1350/9167/10126/29796/836/16…
REACTOME_CROSS_PRESENTATION_OF_SOLUBLE_EXOGENOUS_ANTIGENS_ENDOSOMES	49	0.535791	1.73051	0.00434783	0.0215682	0.0137932	5370	tags=76%, list=28%, signal=54%	5721/5696/5698/5720/7979/5699/5719/5686/10213/5707/5684/5710/5706/5688/5702/5687/5685/5713/5691/5704/5682/5690/5714/5692/5709/5715/5695/5693/10197/5708/5717/9491/5700/5701/5683/9861/23198
HIRSCH_CELLULAR_TRANSFORMATION_SIGNATURE_UP	241	0.424774	1.73058	0.00253807	0.0149503	0.00956095	3777	tags=42%, list=20%, signal=34%	768/1969/306/28231/2582/4071/64866/1604/10903/5329/57211/3706/54863/56938/2274/55785/27242/23474/4907/2069/5328/8061/7050/55034/598/976/1992/5033/9414/9618/4860/22822/9111/5366/6890/3556/8767/837/7004/3665/7422/3430/3601/6303/230/22904/4615/51635/602/8531/9181/51700/57162/79792/4350/10617/3669/5836/124583/59307/2181/55236/5359/79155/23327/7378/1716/6675/54704/211/8773/5351/2530/8519/6478/390/7975…
YAMASHITA_LIVER_CANCER_STEM_CELL_UP	47	0.541995	1.73117	0.00441501	0.0215857	0.0138044	1381	tags=38%, list=7%, signal=36%	22943/1364/1999/4320/2886/9133/6662/9076/57715/25825/6934/7534/7855/578/5916/780/3693/3172
BHATI_G2M_ARREST_BY_2METHOXYESTRADIOL_UP	109	0.475673	1.73123	0.00232558	0.0149503	0.00956095	3205	tags=40%, list=17%, signal=34%	22943/4070/991/2591/4751/9787/259266/55655/4605/8870/699/891/6790/2813/54498/990/124975/55872/83540/301/4085/8942/10447/286676/11335/5111/3320/55706/56034/7011/23327/5684/10267/79955/80119/25923/7037/1965/811/4893/51053/4706/6627/3984
LIANG_SILENCED_BY_METHYLATION_UP	29	0.603528	1.73124	0.00444444	0.0216111	0.0138207	297	tags=28%, list=2%, signal=27%	3855/3880/3918/3872/3429/306/3856/653145
CHIARADONNA_NEOPLASTIC_TRANSFORMATION_KRAS_UP	126	0.463864	1.7323	0.0023753	0.0149503	0.00956095	3961	tags=50%, list=21%, signal=40%	3783/25791/7153/3655/6241/2118/2069/1163/1948/8482/6535/595/374/6696/6790/11130/29128/9768/65108/1058/28969/23397/22822/7127/5888/5099/10447/79733/7162/10733/7114/6611/5597/5111/191/6558/5359/7150/8573/571/6240/7884/5684/2530/7058/3251/10625/51614/6749/5905/2079/89797/22928/159013/3184/2230/200734/6418/5921/5985/201161/25976/3149
WATANABE_RECTAL_CANCER_RADIOTHERAPY_RESPONSIVE_UP	108	0.47617	1.73363	0.00228833	0.0149503	0.00956095	3963	tags=42%, list=21%, signal=33%	5834/2877/8842/999/3613/9725/10227/5968/3269/23443/23231/780/4357/100133941/9289/629/80777/7469/476/5580/378/23042/960/521/6240/10625/6173/55661/7520/80347/6137/567/79095/10726/1665/2495/9948/4435/6182/5440/1080/91/5525/5476/7375
FERRARI_RESPONSE_TO_FENRETINIDE_UP	21	0.64711	1.73365	0.00213675	0.0149503	0.00956095	3284	tags=57%, list=17%, signal=47%	9052/5743/54541/8553/9249/6364/650/6482/10512/1649/3659/8140
REACTOME_DEGRADATION_OF_BETA_CATENIN_BY_THE_DESTRUCTION_COMPLEX	84	0.49918	1.7345	0.00232019	0.0149503	0.00956095	5370	tags=61%, list=28%, signal=44%	6934/5721/5696/5698/5720/7979/1488/23401/5699/8312/3065/5719/5686/10213/7316/5707/5684/5710/5706/5688/5702/5687/5685/5713/5691/5704/5682/7090/5690/5714/5525/5692/5709/5715/1499/5695/5693/5529/10197/5708/5518/5717/9491/2932/5700/5701/9978/5683/6233/9861/23198
MARTORIATI_MDM4_TARGETS_FETAL_LIVER_UP	225	0.426963	1.73615	0.00246914	0.0149503	0.00956095	3685	tags=40%, list=20%, signal=32%	3880/771/3099/125965/9123/30001/133/112399/6768/64065/2118/8870/55214/205/3833/5214/54541/8553/153768/3219/5033/283638/2195/51337/1978/5230/2023/9837/22822/10008/4001/5366/6890/29923/80320/7546/648791/55362/8653/4831/22913/26355/23612/10360/8284/63874/148523/10539/9538/116984/10410/79651/131076/79094/5912/23480/25994/9208/387103/4715/4331/5236/23640/997/7378/84833/84722/220042/3251/1747/60412/793…
REACTOME_INTERFERON_ALPHA_BETA_SIGNALING	68	0.51488	1.73776	0.00228833	0.0149503	0.00956095	3555	tags=41%, list=19%, signal=34%	8638/3429/3664/9636/4940/684/2634/4939/5696/2537/3665/3430/4599/3437/10581/4600/10410/3669/3661/8519/6772/3135/3659/3134/54739/3433/3106/3107
MARTORIATI_MDM4_TARGETS_NEUROEPITHELIUM_UP	163	0.448194	1.73957	0.00238663	0.0149503	0.00956095	3916	tags=45%, list=21%, signal=36%	3880/1510/6513/3099/6281/125965/9123/30001/133/112399/64065/3304/3939/3397/55214/205/3833/595/5214/54541/8553/153768/5033/283638/2195/1978/5230/9780/2023/1021/7167/5202/5366/6890/51512/8653/26355/7422/23612/9538/116984/131076/6636/25994/9208/6223/5236/10440/79017/997/84722/220042/387882/60412/79365/1968/2821/87/25873/116372/84261/2584/115908/5784/7867/22891/1026/4026/5440/5211/7164/581/353322
GENTILE_UV_HIGH_DOSE_UP	20	0.653481	1.73973	0.00423729	0.0211547	0.0135288	2986	tags=55%, list=16%, signal=46%	5646/9636/5366/6923/10272/6303/1337/6236/26471/3589/4314
REACTOME_SIGNALING_BY_MET	79	0.502104	1.73999	0.0022779	0.0149503	0.00956095	1494	tags=19%, list=8%, signal=18%	3914/84951/3918/4233/3909/3675/3673/200958/1301/6692/6714/10653/5879/3845/382
CAIRO_PML_TARGETS_BOUND_BY_MYC_DN	12	0.738237	1.74006	0.00842105	0.0341525	0.0218411	611	tags=33%, list=3%, signal=32%	133/2064/3304/595
WEIGEL_OXIDATIVE_STRESS_RESPONSE	33	0.581417	1.74039	0.00217865	0.0149503	0.00956095	2303	tags=33%, list=12%, signal=29%	3694/1001/3159/3397/8870/890/2063/4173/826/1312/8573
REACTOME_TELOMERE_C_STRAND_LAGGING_STRAND_SYNTHESIS	24	0.633358	1.74039	0.00430108	0.0214045	0.0136885	4554	tags=71%, list=24%, signal=54%	57804/5111/5984/2237/5427/6119/56655/5558/5425/5426/5424/5982/10714/5985/23649/1763/3978
SANA_RESPONSE_TO_IFNG_DN	83	0.500077	1.7408	0.00230415	0.0149503	0.00956095	4105	tags=54%, list=22%, signal=43%	3855/22943/1728/22974/389/7277/3068/3329/5445/64399/6611/415116/9538/11014/4697/91768/4259/5052/8793/10440/22948/5901/7037/3624/6633/7203/3956/5425/1434/11082/6175/5036/4319/9645/84916/328/3326/3155/10575/6746/57142/56950/23406/3921/51108
GOTZMANN_EPITHELIAL_TO_MESENCHYMAL_TRANSITION_DN	195	0.436119	1.74174	0.00245098	0.0149503	0.00956095	3908	tags=43%, list=21%, signal=35%	3880/3691/3958/3557/5468/9957/6385/4071/5801/127534/2950/5002/7153/1604/728113/1577/3866/8061/9982/1755/999/7534/6510/2222/3161/10140/2059/6920/311/7416/9314/7086/3732/6284/5720/6150/51274/22913/677/4322/1907/6788/3070/5269/3145/10559/343/191/5744/805/7328/10963/10134/2937/1207/378/5362/10987/8773/55858/6372/9592/7203/10797/9091/6141/7139/7163/51082/5036/22928/6342/1628/6993/9368/1026/1891/3052/1…
KEGG_OXIDATIVE_PHOSPHORYLATION	116	0.471232	1.74209	0.00231481	0.0149503	0.00956095	5346	tags=54%, list=28%, signal=39%	125965/10312/5464/4709/9377/525/4697/509/1537/1329/1340/9551/1337/1345/518/4715/7388/4710/521/27068/7384/27089/1349/4725/527/4716/10063/514/4706/7385/4729/4728/4720/1327/4704/6391/6389/51382/6392/513/517/4717/1351/4694/4722/10476/4705/4723/4713/4726/6390/1355/1350/9167/29796/4695/539/516/4719/4711/440567/4700/506
REACTOME_CONDENSATION_OF_PROPHASE_CHROMOSOMES	13	0.719613	1.74209	0.00821355	0.0336323	0.0215084	2880	tags=54%, list=15%, signal=46%	5347/983/891/54892/10051/387893/23310
FARMER_BREAST_CANCER_CLUSTER_3	16	0.680584	1.74267	0.00829876	0.0337724	0.021598	1378	tags=50%, list=7%, signal=46%	10158/30001/133/7851/55240/9076/8942/1956
VETTER_TARGETS_OF_PRKCA_AND_ETS1_DN	16	0.681412	1.74479	0.00829876	0.0337724	0.021598	2768	tags=62%, list=15%, signal=53%	7262/1728/3303/10643/1469/4312/6672/1472/10109/1470
CAFFAREL_RESPONSE_TO_THC_24HR_5_DN	54	0.535496	1.74536	0.0044843	0.0217221	0.0138917	4084	tags=44%, list=22%, signal=35%	5349/11065/2305/983/6241/51203/10682/10653/9768/4709/9551/378/4830/10465/84833/5055/5902/6472/7301/3191/5862/998/9556/4694
KYNG_ENVIRONMENTAL_STRESS_RESPONSE_DN	17	0.671629	1.74538	0.0104384	0.0401041	0.0256473	1572	tags=35%, list=8%, signal=32%	1308/6662/10256/1500/64841/2526
REACTOME_TFAP2_AP_2_FAMILY_REGULATES_TRANSCRIPTION_OF_GROWTH_FACTORS_AND_THEIR_RECEPTORS	15	0.690445	1.74551	0.00823045	0.0336425	0.0215149	2101	tags=67%, list=11%, signal=59%	7020/7039/93659/2064/94115/1082/1956/7022/7422/29028
LANDEMAINE_LUNG_METASTASIS	21	0.65171	1.74597	0.00213675	0.0149503	0.00956095	2394	tags=38%, list=13%, signal=33%	1001/55612/29842/794/1824/7368/149466/3696
LIANG_SILENCED_BY_METHYLATION_2	53	0.537284	1.74619	0.00443459	0.0215857	0.0138044	3327	tags=55%, list=18%, signal=45%	3872/6275/6590/3934/638/4907/5266/5743/374/4312/4939/2537/6364/6374/6672/3665/4599/3437/4600/10561/8743/6809/10964/6772/6372/3624/5055/54739/3433
BLUM_RESPONSE_TO_SALIRASIB_UP	233	0.427332	1.74736	0.00246914	0.0149503	0.00956095	4789	tags=52%, list=25%, signal=40%	2582/1604/5768/8061/645/6510/598/4312/23764/578/8795/8780/1978/7355/5202/5898/23645/26227/2101/837/5663/5970/2872/3628/955/8894/9181/57761/7791/1022/5597/3669/7251/6992/9616/7328/56888/5971/23423/7374/2673/571/378/57403/7009/1798/8667/8882/6810/10040/1475/27230/22820/6478/3840/8774/26471/586/10066/8878/10797/4528/51160/1054/813/10897/9093/5886/7159/5034/64746/29968/6472/54676/10135/7818/4817/1662…
BROWNE_INTERFERON_RESPONSIVE_GENES	65	0.520463	1.74855	0.00225225	0.0149503	0.00956095	2665	tags=52%, list=14%, signal=45%	8638/3429/9833/9636/5920/684/2634/4939/5696/9111/5698/2537/6890/5371/7098/6672/3665/11177/3430/4599/3437/3601/4615/4600/10561/3669/10616/6737/8743/5359/1890/10964/9246/6772
OSAWA_TNF_TARGETS	10	0.779867	1.74945	0.00852878	0.0345294	0.0220821	3104	tags=70%, list=16%, signal=59%	1942/8870/9170/7127/3026/3576/7159
KEGG_FRUCTOSE_AND_MANNOSE_METABOLISM	34	0.578411	1.74968	0.00441501	0.0215857	0.0138044	2008	tags=35%, list=11%, signal=32%	3099/57016/7264/5214/226/2762/6652/7167/2203/3098/230/5373
RICKMAN_TUMOR_DIFFERENTIATED_MODERATELY_VS_POORLY_UP	122	0.469533	1.75036	0.00230947	0.0149503	0.00956095	3357	tags=37%, list=18%, signal=31%	56649/81607/4070/6277/200879/9743/10053/9572/83442/64151/54843/80223/11015/84798/995/25878/899/55215/57153/25978/55568/26996/54836/9735/79629/8894/6626/666/400916/22906/4681/5480/7975/80178/378/54414/9545/10267/91300/55226/6627/4998/84674/163486/1774
KIM_TIAL1_TARGETS	29	0.610315	1.75071	0.00222222	0.0149503	0.00956095	4172	tags=62%, list=22%, signal=48%	11065/1476/79071/4597/9289/55505/1111/4496/6636/8379/6634/197370/6472/2267/3911/1327/622/7041
REN_ALVEOLAR_RHABDOMYOSARCOMA_DN	405	0.409315	1.7511	0.00268097	0.015151	0.00968933	3495	tags=36%, list=19%, signal=30%	6277/1728/9536/1893/6281/4061/1999/302/4071/90993/822/706/57214/51330/26031/1476/5329/8754/64285/1212/6237/2274/5768/1192/4907/5328/55715/7045/977/595/10682/858/83442/2017/81/4088/4323/27347/8407/5033/5327/389/3486/2762/4017/7355/334/81855/54458/11015/64834/5879/301/29766/6284/26872/60370/3417/57175/1265/831/1956/7171/837/53827/1174/7162/58472/10487/25978/10272/51474/10938/23052/23585/10094/2000/…
LIU_PROSTATE_CANCER_UP	92	0.492371	1.75139	0.00228311	0.0149503	0.00956095	3281	tags=49%, list=17%, signal=41%	90993/6768/54795/4072/6493/6662/2705/26472/128434/9518/401546/51809/9185/65108/2762/57630/28969/6659/5831/353/957/2203/4831/955/10434/6573/3223/901/124583/10221/27102/347734/200916/51280/5530/9545/79017/6675/27230/811/10797/64284/4646/27075/84899
REACTOME_EPHA_MEDIATED_GROWTH_CONE_COLLAPSE	29	0.61095	1.75253	0.00222222	0.0149503	0.00956095	1049	tags=38%, list=6%, signal=36%	1969/79784/1944/25791/1945/1942/2041/6714/103910/1943/1946
ENGELMANN_CANCER_PROGENITORS_DN	64	0.524151	1.7528	0.00225734	0.0149503	0.00956095	2790	tags=41%, list=15%, signal=35%	6286/4680/9022/7033/51195/8714/3860/5653/8437/652/155465/3397/7464/163732/8644/828/94121/25953/55343/2335/4681/29948/960/8693/3566/59341
AMIT_EGF_RESPONSE_120_HELA	68	0.519638	1.75381	0.00228833	0.0149503	0.00956095	2831	tags=41%, list=15%, signal=35%	1969/3728/7039/5329/2152/8061/374/9518/2050/1846/23764/8795/79720/8915/23529/4597/51278/65124/1848/10435/6303/182/1605/10607/5606/8882/3576/56892
REACTOME_TP53_REGULATES_TRANSCRIPTION_OF_CELL_DEATH_GENES	44	0.559882	1.75405	0.00225734	0.0149503	0.00956095	3908	tags=52%, list=21%, signal=42%	64065/79370/55240/27113/332/8797/3486/8795/9540/5366/839/843/8793/27166/7161/8626/124446/637/7159/835/10650/84883/581
REACTOME_RESOLUTION_OF_ABASIC_SITES_AP_SITES	38	0.574483	1.75492	0.00228311	0.0149503	0.00956095	4554	tags=61%, list=24%, signal=46%	57804/5423/5111/4350/4913/5984/23583/7374/11284/2237/5427/6119/56655/5425/5426/5424/5982/328/10714/5985/7515/54936/3978
REACTOME_TP53_REGULATES_TRANSCRIPTION_OF_GENES_INVOLVED_IN_G2_CELL_CYCLE_ARREST	18	0.668404	1.75543	0.00414938	0.0209398	0.0133913	1938	tags=33%, list=10%, signal=30%	2810/983/891/6790/995/5111
MINGUEZ_LIVER_CANCER_VASCULAR_INVASION_UP	13	0.725692	1.75681	0.00821355	0.0336323	0.0215084	3451	tags=62%, list=18%, signal=50%	11065/100133941/1033/7298/3069/10945/26003/4728
NAKAMURA_METASTASIS_MODEL_UP	42	0.567155	1.75735	0.00225225	0.0149503	0.00956095	1039	tags=29%, list=6%, signal=27%	1308/2707/3860/9957/9123/7851/54863/8061/84842/3217/51702/5230
ZHONG_SECRETOME_OF_LUNG_CANCER_AND_MACROPHAGE	72	0.515108	1.75863	0.0022779	0.0149503	0.00956095	2958	tags=44%, list=16%, signal=38%	10232/5646/6385/302/6382/3939/375790/999/7534/1015/1356/5230/2023/7167/629/6888/60/2335/2224/3959/124583/10036/5052/994/1512/22883/4191/9446/83707/5688/5687/5685
PHONG_TNF_RESPONSE_VIA_P38_PARTIAL	162	0.45337	1.76059	0.00235294	0.0149503	0.00956095	3038	tags=40%, list=16%, signal=33%	9052/3783/22943/80117/51316/3949/133/79669/7039/1294/5329/375790/3397/8870/55785/27242/2069/5328/1948/6934/6790/4088/10140/54101/23764/8795/6574/6744/23767/5099/8942/11221/5366/6364/1956/650/6526/11177/8549/2683/3976/7421/23286/901/5744/10512/4791/64778/960/4794/23327/1316/3667/3638/3576/3566/3460/3624/637/56892/8878/5055/10105/7042
SCIBETTA_KDM5B_TARGETS_UP	19	0.667333	1.76242	0.00420168	0.0211124	0.0135017	2377	tags=47%, list=13%, signal=41%	54498/23529/54820/8635/5423/6303/10938/51526/1649
REACTOME_CONDENSATION_OF_PROMETAPHASE_CHROMOSOMES	11	0.76737	1.76521	0.00641026	0.028444	0.0181904	3383	tags=82%, list=18%, signal=67%	983/9133/891/64151/23397/10051/1457/9918/1460
REACTOME_ACTIVATION_OF_NF_KAPPAB_IN_B_CELLS	67	0.523549	1.76627	0.00227273	0.0149503	0.00956095	5370	tags=67%, list=28%, signal=48%	84433/8915/5721/5696/5698/5720/7979/5970/5699/5719/5686/10213/4793/4794/7316/5707/5684/5710/5706/5688/5702/5687/5685/5713/5691/5704/5682/5690/5714/5692/5709/5715/5695/5693/10197/5708/5717/9491/5700/5701/5683/3551/6233/9861/23198
BRUECKNER_TARGETS_OF_MIRLET7A3_DN	75	0.511261	1.76646	0.00220264	0.0149503	0.00956095	3410	tags=44%, list=18%, signal=36%	11199/9536/306/5468/2317/57016/132299/11145/1301/56937/81610/388610/4017/5792/6374/9689/284996/8828/55568/2335/3320/3959/55959/2817/1289/3927/7042/10096/114294/91523/23471/51704/83877
FARDIN_HYPOXIA_11	32	0.597258	1.76735	0.00221239	0.0149503	0.00956095	4464	tags=72%, list=24%, signal=55%	112399/205/54541/8553/3486/5230/51129/7167/26355/7422/230/55818/5236/5351/51537/10318/8974/10628/5163/353322/5210/4601/10397
KANG_CISPLATIN_RESISTANCE_UP	21	0.659715	1.76742	0.00213675	0.0149503	0.00956095	2162	tags=43%, list=11%, signal=38%	113146/3728/3304/51304/4192/23764/51278/7035/3489
MARTINEZ_RESPONSE_TO_TRABECTEDIN_DN	269	0.427299	1.76766	0.00244499	0.0149503	0.00956095	4452	tags=41%, list=24%, signal=32%	6513/54443/11065/10644/55165/5347/7153/983/10276/8061/699/7050/6790/890/3832/598/2059/29089/3336/51514/23186/1104/6744/995/79071/4862/9111/1956/60488/9334/90355/8772/182/9181/8548/29088/1022/6780/5111/51727/9231/25921/10808/2181/81619/5686/7150/5870/5796/10213/5586/83939/79718/23028/8476/81873/58526/9188/5706/115353/7520/5324/1457/4528/5685/5558/26091/23613/9184/56984/7112/10728/10527/28985/7465/…
RADAEVA_RESPONSE_TO_IFNA1_UP	48	0.551734	1.76844	0.00441501	0.0215857	0.0138044	3908	tags=62%, list=21%, signal=50%	3429/9636/684/2537/5720/3665/3430/4599/10581/4600/10561/10410/3959/8743/5359/10964/9246/5245/8519/6772/203068/6373/811/3659/3134/354/5982/3107/1870/581
SEITZ_NEOPLASTIC_TRANSFORMATION_BY_8P_DELETION_UP	73	0.515237	1.76883	0.00226244	0.0149503	0.00956095	2162	tags=38%, list=11%, signal=34%	9052/7031/8638/3429/54575/10874/9957/652/7851/1948/54809/9636/5920/55601/9314/10863/4860/100133941/6652/4939/4599/3437/23585/4600/10561/3669/64135/3489
LEE_LIVER_CANCER_HEPATOBLAST	16	0.690872	1.76901	0.00622407	0.0278829	0.0178316	808	tags=50%, list=4%, signal=48%	3855/3880/3909/5329/2152/7430/5743/4312
REACTOME_ALPHA_DEFENSINS	10	0.789597	1.77127	0.00426439	0.0212673	0.0136008	113	tags=20%, list=1%, signal=20%	5645/5646
REACTOME_ASYMMETRIC_LOCALIZATION_OF_PCP_PROTEINS	64	0.529712	1.7714	0.00225734	0.0149503	0.00956095	5370	tags=69%, list=28%, signal=49%	7855/23513/5721/57154/5696/5698/5720/7979/5699/7474/5719/5686/10213/7316/5707/5684/5710/5706/5688/5702/5687/2535/5685/5713/5691/5704/5682/5690/5714/5692/5709/5715/5695/5693/10197/5708/5717/9491/5700/5701/5683/6233/9861/23198
RHEIN_ALL_GLUCOCORTICOID_THERAPY_DN	360	0.417978	1.77172	0.00258398	0.0149503	0.00956095	3798	tags=45%, list=20%, signal=37%	3159/55165/7153/983/1894/6241/3939/9133/8853/1164/1163/27346/332/51203/9055/928/9833/84790/8553/9232/11130/3832/64151/3161/2597/3315/79682/29127/701/55930/9768/4173/65108/7416/7272/51514/28969/9314/5230/10635/2023/7086/6652/4171/5888/4085/7167/5696/56992/5698/471/5464/25804/60488/79733/6888/1848/6526/1111/5478/51097/4282/4522/79801/51659/7298/29789/55699/6611/5111/1603/11014/29081/509/10606/6635/…
MACLACHLAN_BRCA1_TARGETS_UP	21	0.661335	1.77176	0.00213675	0.0149503	0.00956095	3658	tags=57%, list=19%, signal=46%	4233/3955/7153/2597/5879/5111/7150/1649/997/5127/387/1026
BIOCARTA_SM_PATHWAY	14	0.716116	1.77212	0.00626305	0.0279502	0.0178746	3089	tags=71%, list=16%, signal=60%	6628/6637/6626/6635/6636/6634/6632/6633/6631/6627
DAZARD_UV_RESPONSE_CLUSTER_G28	18	0.675003	1.77276	0.00414938	0.0209398	0.0133913	1343	tags=44%, list=7%, signal=41%	7262/4070/302/8870/4495/5743/5366/6364
ELVIDGE_HIF1A_TARGETS_DN	91	0.500124	1.77369	0.00228833	0.0149503	0.00956095	2041	tags=32%, list=11%, signal=29%	768/113146/6513/3099/6275/30001/133/112399/1944/3866/5768/205/1824/5033/3486/23764/6676/4017/81855/5230/51129/51141/283/29923/1956/26355/230/3669/54985
REACTOME_UCH_PROTEINASES	85	0.510917	1.77701	0.00234192	0.0149503	0.00956095	5370	tags=62%, list=28%, signal=45%	5721/5696/5698/5720/86/7979/60/5699/5719/580/5686/10213/8607/11047/7316/5707/5684/4738/5710/5706/5688/5702/7347/5687/5685/5713/5691/5704/125476/5682/51377/5690/5714/5692/5709/5715/7528/5695/5693/10197/5708/114785/5717/9491/4798/5700/5701/83444/79913/5683/6233/9861/23198
KARLSSON_TGFB1_TARGETS_UP	118	0.480356	1.77703	0.00236407	0.0149503	0.00956095	4752	tags=58%, list=25%, signal=44%	2707/302/51330/6241/56937/8553/4323/6574/9185/3336/1104/26227/5464/7171/23092/84280/11177/23333/8531/8894/7791/10808/27101/2963/960/1316/51388/997/2131/8662/1981/58527/7804/9804/4691/9188/80219/1965/7347/7203/586/26354/7168/5550/87/5747/292/10096/84128/6472/10694/55854/26156/51375/10576/9221/6418/23560/2653/1737/51154/80155/649/9100/10200/54888/55646/6059/79833
MOREAUX_MULTIPLE_MYELOMA_BY_TACI_DN	171	0.456156	1.7779	0.00245098	0.0149503	0.00956095	5577	tags=49%, list=30%, signal=35%	4233/983/6566/29127/2146/4171/25804/86/7979/1111/7298/10856/83940/580/9616/6183/151246/10221/10480/6742/22948/23080/80218/171586/5684/55191/55858/6632/118487/81539/5901/10969/23310/5203/7965/9184/8886/56926/23658/11164/5704/10016/84233/84916/84529/51234/10576/9343/55120/195828/55319/1736/51633/11179/9801/5714/9158/2653/2188/114971/10992/10926/65084/152100/92609/51121/51501/10605/1653/6597/54939/5…
REACTOME_REGULATED_NECROSIS	20	0.667833	1.77794	0.00211864	0.0149503	0.00956095	3000	tags=55%, list=16%, signal=46%	8797/11035/8795/8717/841/8772/330/197259/8743/7316/7186
DORN_ADENOVIRUS_INFECTION_48HR_DN	40	0.576604	1.77807	0.0022779	0.0149503	0.00956095	965	tags=30%, list=5%, signal=29%	5268/3880/1969/51330/1294/1942/8870/2274/595/3861/8412/9618
AKL_HTLV1_INFECTION_UP	27	0.625862	1.77989	0.00214592	0.0149503	0.00956095	2975	tags=56%, list=16%, signal=47%	3958/6281/10276/8673/1495/6659/5315/7923/58472/6303/230/4830/3418/9448/3956
CREIGHTON_ENDOCRINE_THERAPY_RESISTANCE_5	471	0.410954	1.78031	0.00273224	0.0152015	0.00972164	2246	tags=27%, list=12%, signal=24%	1048/5753/4680/4582/10103/1001/1364/150696/4070/10551/58489/8537/306/114569/11033/10753/6382/3955/112399/5874/2591/638/11343/7113/55040/2064/10276/79887/1604/10205/1718/8754/64285/120224/83959/144100/7430/6493/7464/100505989/1192/1948/51090/9914/9518/79170/123036/23508/8673/51809/1500/7855/222/1040/9414/8795/80323/8780/6574/3321/55625/5205/100506658/157638/334/10529/54621/11015/23303/80000/342979…
SESTO_RESPONSE_TO_UV_C1	73	0.518887	1.78136	0.00226244	0.0149503	0.00956095	3383	tags=45%, list=18%, signal=37%	3875/4071/3934/3775/2591/6820/2877/1474/9414/481/7417/55969/3065/5597/3320/7251/5686/6674/5606/9592/5706/7329/10318/2935/5687/1457/6700/5055/4076/6627/6703/10135/1460
WANG_HCP_PROSTATE_CANCER	103	0.495109	1.78155	0.00236967	0.0149503	0.00956095	2001	tags=26%, list=11%, signal=24%	6286/8000/10232/4582/5307/9022/10045/29984/7286/1604/6493/634/55214/445/3486/1869/10529/9540/23645/3206/79101/1396/79026/2335/2683/7474/23286
BEGUM_TARGETS_OF_PAX3_FOXO1_FUSION_DN	45	0.565876	1.78308	0.00226757	0.0149503	0.00956095	2025	tags=40%, list=11%, signal=36%	3691/1969/2317/3675/652/7869/51330/3397/6662/55240/2150/598/7481/4091/29775/7422/7421/23677
TERAMOTO_OPN_TARGETS_CLUSTER_4	14	0.720691	1.78344	0.00626305	0.0279502	0.0178746	1508	tags=43%, list=8%, signal=39%	6275/3939/56937/2168/471/1111
LI_WILMS_TUMOR_VS_FETAL_KIDNEY_1_DN	156	0.461144	1.78441	0.002331	0.0149503	0.00956095	3279	tags=45%, list=17%, signal=37%	8091/1382/22974/4288/991/7153/1063/983/9787/9133/1164/1163/3833/9833/5214/6790/7534/9232/11004/9928/6566/3832/701/9768/7272/784/9700/9212/995/2146/10615/4171/1033/4085/4001/9319/11113/79602/6732/55215/23246/10733/11177/10535/5111/10051/1017/9231/6495/6636/10036/2817/7374/4830/2237/6240/9448/6749/9793/7203/7520/10797/5558/55660/6627/7159/9184/4436/6472/52
PEDERSEN_METASTASIS_BY_ERBB2_ISOFORM_4	106	0.492264	1.78466	0.00230415	0.0149503	0.00956095	2481	tags=38%, list=13%, signal=33%	84985/26579/3918/7262/10331/3898/10551/6277/64063/5468/8714/53836/9123/55971/85414/120224/2274/444/634/23508/445/3606/7277/136/283991/301/642273/59277/11322/760/6303/1303/2335/400793/93185/83990/51280/4477/3892/375791
REACTOME_EXTENSION_OF_TELOMERES	30	0.618299	1.78472	0.00224719	0.0149503	0.00956095	4554	tags=70%, list=24%, signal=53%	57804/5111/10856/5984/8607/2237/5427/6119/56655/5558/5425/5426/5424/5982/10714/55651/1736/5985/23649/1763/3978
FU_INTERACT_WITH_ALKBH8	13	0.737336	1.785	0.00821355	0.0336323	0.0215084	4504	tags=77%, list=24%, signal=59%	3320/22948/1622/7203/908/51504/10694/10576/10575/10574
REACTOME_LEADING_STRAND_SYNTHESIS	14	0.721411	1.78522	0.00626305	0.0279502	0.0178746	4179	tags=71%, list=22%, signal=56%	57804/5111/5984/5558/5425/5424/5982/10714/5985/23649
LINDGREN_BLADDER_CANCER_CLUSTER_1_DN	368	0.420351	1.78795	0.00257069	0.0149503	0.00956095	3373	tags=43%, list=18%, signal=36%	5652/1364/27134/6275/11065/57530/51316/822/2065/5347/7153/1063/7083/51155/983/4751/2064/6241/9787/9133/1942/4605/6713/165545/9235/1163/27346/4495/332/699/9055/3833/891/9833/10682/55143/81610/6790/24137/645/9232/11130/11004/9928/990/3832/8407/79682/29127/1062/285973/1869/3157/8751/7416/81620/3068/283358/55635/1058/4017/25886/10188/5831/8318/2146/83879/5888/3329/5046/57154/128218/9319/9144/157313/3…
WENG_POR_TARGETS_GLOBAL_UP	18	0.680883	1.7882	0.00207469	0.0149503	0.00956095	2503	tags=67%, list=13%, signal=58%	1562/6713/23474/6307/1717/6920/3157/80777/8824/2224/343/1595
LI_CYTIDINE_ANALOG_PATHWAY	17	0.688257	1.78859	0.00417537	0.0210028	0.0134316	3764	tags=59%, list=20%, signal=47%	978/6241/3177/64078/51727/30833/51251/6240/22978/1635
AMIT_SERUM_RESPONSE_480_MCF10A	37	0.587751	1.78918	0.00226244	0.0149503	0.00956095	3119	tags=46%, list=17%, signal=38%	6286/3853/6699/7851/6698/8061/81/100133941/55388/8702/55257/23640/8636/100287932/6700/7168/10280
REACTOME_RESPIRATORY_ELECTRON_TRANSPORT_ATP_SYNTHESIS_BY_CHEMIOSMOTIC_COUPLING_AND_HEAT_PRODUCTION_BY_UNCOUPLING_PROTEINS	110	0.492736	1.7898	0.00235294	0.0149503	0.00956095	5819	tags=65%, list=31%, signal=46%	4709/9377/4697/509/1537/1329/1340/9551/1337/1345/518/2108/4715/7388/54205/4710/10131/521/7384/27089/55967/1349/80219/4725/4716/514/4706/7385/4729/10128/4728/4720/1327/4704/2109/6391/6389/6392/51241/513/517/4717/1351/4694/4722/51300/10476/4705/4723/4713/4726/6390/28976/1350/9167/29796/54539/116228/4695/539/516/4719/4711/4700/506/10632/80224/25915/55863/6834/4696/4707
REACTOME_COMPLEX_I_BIOGENESIS	49	0.55426	1.79017	0.00434783	0.0215682	0.0137932	6261	tags=67%, list=33%, signal=45%	4709/4715/4710/55967/4725/4716/4706/4729/4728/4720/4704/4717/4694/4722/51300/4705/4723/4713/4726/28976/54539/4695/4719/4711/4700/80224/25915/55863/4696/4707/4712/4724/4718
REACTOME_PURINE_CATABOLISM	17	0.688942	1.79038	0.00417537	0.0210028	0.0134316	3301	tags=59%, list=17%, signal=49%	7498/4907/4860/30833/4521/3704/55270/9615/11164/22978
BAE_BRCA1_TARGETS_UP	70	0.528546	1.79104	0.00228311	0.0149503	0.00956095	3905	tags=44%, list=21%, signal=35%	3880/3958/3775/3728/10276/10903/6307/222/3486/4257/10653/301/240/8942/7979/7422/6303/7114/4697/901/6778/8887/6259/6415/7042/10589/23471/11333/27257/7555/6917
DAZARD_RESPONSE_TO_UV_NHEK_UP	208	0.446588	1.79167	0.00245098	0.0149503	0.00956095	3880	tags=42%, list=21%, signal=34%	7262/1364/4070/5646/6690/4061/302/4071/133/89870/6947/7083/6820/7264/1212/8870/1301/634/4495/5743/1474/9572/3158/7295/885/9961/10140/1535/6813/5230/5315/22822/1573/8942/4939/2987/353/23645/5366/6364/27338/7849/22913/10383/826/57152/6635/6778/23480/3489/6187/10221/1890/4331/521/5106/6227/2296/1892/3576/5127/8655/9592/6173/51614/6711/10105/55558/2821/10063/5902/3134/79095/4319/10248/10614/2644/3326…
SCHLOSSER_MYC_AND_SERUM_RESPONSE_SYNERGY	31	0.614732	1.79212	0.00225225	0.0149503	0.00956095	5211	tags=61%, list=28%, signal=44%	8407/5831/23401/6626/6183/10452/2356/9887/4725/56926/92703/10067/6182/11007/23647/2193/23367/5438/8570
REACTOME_SELENOAMINO_ACID_METABOLISM	108	0.492316	1.79242	0.00228833	0.0149503	0.00956095	6647	tags=74%, list=35%, signal=48%	6192/6132/116832/3176/191/6187/6223/200916/51065/6227/6159/6158/6173/6229/6157/6141/6181/7965/6188/6176/25873/6137/6175/6142/6217/22928/6136/6170/6166/2197/6209/11224/6165/9045/6156/6160/1491/9255/3921/6152/6167/6134/6235/6230/6123/6222/51121/2936/6168/6193/6210/6155/27232/6218/6231/6161/6207/6201/6224/6233/4736/7296/6205/6129/6208/6146/6143/6171/6234/6147/23521/6135/875/51091/7311/60678/9521/515…
PID_MYC_ACTIV_PATHWAY	79	0.518514	1.79685	0.0022779	0.0149503	0.00956095	3264	tags=41%, list=17%, signal=34%	6513/3159/7083/3939/8061/332/891/4088/2597/5757/1104/2023/83879/3329/5366/86/4831/11235/3320/10856/6881/8607/4830/1981/4691/993/7037/1965/586/8886/4869/92140
ZHAN_V2_LATE_DIFFERENTIATION_GENES	41	0.584476	1.79687	0.00229358	0.0149503	0.00956095	4093	tags=56%, list=22%, signal=44%	638/5355/5315/2146/1033/3561/2203/6888/3654/1022/826/580/5092/1316/2356/5756/3956/3659/1662/23516/6309/483/1520
GUENTHER_GROWTH_SPHERICAL_VS_ADHERENT_DN	25	0.650701	1.79726	0.00221239	0.0149503	0.00956095	3405	tags=60%, list=18%, signal=49%	4233/1728/5329/9961/5829/7414/2335/4179/5580/960/966/7042/3688/308/1509
CHIARADONNA_NEOPLASTIC_TRANSFORMATION_CDC25_DN	143	0.474165	1.79766	0.00242131	0.0149503	0.00956095	2266	tags=40%, list=12%, signal=35%	10232/3918/3691/51316/822/30001/133/706/11202/64114/375790/728113/144100/2274/57146/1192/10755/307/928/977/8553/57804/6510/10140/5318/311/1978/9314/6717/6284/2987/60370/80777/57104/6888/8824/57140/3382/7004/25953/84270/23612/339665/9181/57761/340371/5269/10434/22906/6778/100820829/2014/10512/4363/55861/4259/2817
FRASOR_RESPONSE_TO_ESTRADIOL_DN	74	0.523286	1.79804	0.00225225	0.0149503	0.00956095	1208	tags=32%, list=6%, signal=30%	9052/3855/4582/8537/306/4071/652/2065/638/9121/2064/1942/8870/54541/23508/4088/1846/578/6623/51141/100133941/3887/4151/8942
REACTOME_HSF1_ACTIVATION	31	0.616915	1.79849	0.00225225	0.0149503	0.00956095	2122	tags=39%, list=11%, signal=34%	3303/3304/27242/3315/2288/3310/3337/3297/162989/3320/871/10808
GHO_ATF5_TARGETS_DN	16	0.703022	1.80012	0.00414938	0.0209398	0.0133913	2970	tags=69%, list=16%, signal=58%	6513/3673/3397/6237/10112/81/9319/6184/54732/390/9524
JIANG_VHL_TARGETS	86	0.515845	1.80022	0.00234742	0.0149503	0.00956095	5230	tags=57%, list=28%, signal=41%	4288/64423/9322/7264/10024/124222/823/26010/26136/8428/29923/6195/25953/4522/23585/29088/64968/5111/1017/51582/8743/54991/7125/55825/8766/3659/55075/1434/5424/8140/6175/27352/55299/23406/51324/9255/51668/51121/5018/92259/10200/51693/27258/8508/2026/821/25962/2764/56683
KIM_WT1_TARGETS_DN	457	0.417124	1.80101	0.0027248	0.0152015	0.00972164	3495	tags=32%, list=19%, signal=27%	5753/652/55165/991/7153/1063/3303/983/4751/10276/64065/7286/80162/3304/9787/55355/10643/259266/3397/55785/2150/1164/10553/10112/6934/699/51203/595/6469/7050/55143/6790/890/54541/57804/11004/9928/23204/3832/64151/598/10140/29127/3216/3280/1062/701/55366/1978/7263/7272/1058/51192/9700/10635/3337/9212/10403/10263/64834/81930/79071/4085/83461/5366/51512/25804/8543/899/373156/6526/54478/7022/51170/798…
HORTON_SREBF_TARGETS	24	0.65596	1.8025	0.00215054	0.0149503	0.00956095	3957	tags=62%, list=21%, signal=49%	3949/255738/6713/2222/3157/79071/55902/230/2224/1595/3638/7108/10654/6309/51478
REACTOME_DECTIN_2_FAMILY	26	0.646535	1.80321	0.00221729	0.0149503	0.00956095	918	tags=35%, list=5%, signal=33%	4586/4582/140453/4585/94025/200958/727897/4584/394263
ANDERSEN_LIVER_CANCER_KRT19_UP	35	0.598261	1.8037	0.00226757	0.0149503	0.00956095	4430	tags=54%, list=23%, signal=42%	1476/4072/1515/55625/26136/11335/805/30834/51602/22934/6157/4321/10576/6993/328/6165/10657/6230/6222
ZWANG_CLASS_1_TRANSIENTLY_INDUCED_BY_EGF	492	0.415702	1.80388	0.0027248	0.0152015	0.00972164	2491	tags=26%, list=13%, signal=23%	8000/3868/9052/3914/3694/3918/195814/7262/4233/3909/27111/55057/140576/64063/6385/4071/6590/85415/3949/7039/116154/64866/56262/26031/7286/84612/3397/6662/2274/2069/5328/8061/1948/9914/8482/4645/10626/374/2635/54498/54541/6461/163732/4088/6192/598/8412/1846/9748/80323/80005/57630/170679/56164/55357/10265/4643/6744/9069/58516/51129/8915/51141/57619/10615/11057/5099/221035/51278/60370/11221/6318/152…
AUNG_GASTRIC_CANCER	54	0.553544	1.80418	0.0044843	0.0217221	0.0138917	3971	tags=50%, list=21%, signal=40%	83998/5349/6819/10562/4605/332/24137/8190/6132/3206/4007/55920/54905/55204/27121/55055/7203/5603/8683/93974/7301/4319/6892/501/83699/54959/2114
SPIELMAN_LYMPHOBLAST_EUROPEAN_VS_ASIAN_UP	475	0.417446	1.80443	0.00278552	0.0153879	0.00984082	4856	tags=48%, list=26%, signal=37%	2810/6282/3099/11065/2582/3775/991/7153/1063/3303/10276/1476/1718/7408/7430/1164/10024/10755/10112/10682/6790/9232/1855/2017/64151/976/95/3315/1717/10312/3280/5757/65108/1978/3157/5205/6813/2175/10403/10263/2146/4357/9401/10615/5721/23594/353/6150/7784/25804/80777/899/86/10099/11161/11322/1051/196/4831/6923/22913/26063/10460/10204/4248/5119/3065/6788/8531/54503/2683/3145/2224/476/23593/54535/3835…
PID_DELTA_NP63_PATHWAY	47	0.565361	1.8058	0.00441501	0.0215857	0.0138044	3043	tags=47%, list=16%, signal=39%	2810/3675/7153/64065/9133/2877/3861/3852/3486/3280/10413/23541/3070/7421/1289/11047/8626/861/11059/6236/1029/3552
DAZARD_UV_RESPONSE_CLUSTER_G2	27	0.635073	1.80608	0.00214592	0.0149503	0.00956095	1407	tags=37%, list=7%, signal=34%	7262/1364/4070/4061/7264/8870/10140/5366/6364/27338
REACTOME_MITOCHONDRIAL_PROTEIN_IMPORT	64	0.540351	1.80698	0.00225734	0.0149503	0.00956095	5966	tags=70%, list=32%, signal=48%	7416/3329/197257/10651/400916/1537/51287/388753/2671/10440/10452/51142/9804/84269/100287932/10245/10063/54927/4580/51025/6901/80273/26521/56993/26520/10165/79145/92609/131118/90639/56942/27235/131474/3421/617/26517/26519/516/506/3313/1678/9512/1431/134266/9868
DELACROIX_RAR_TARGETS_UP	47	0.565846	1.80735	0.00441501	0.0215857	0.0138044	1665	tags=34%, list=9%, signal=31%	10232/5652/771/1382/64063/3159/4071/726/51330/8553/10312/9249/1356/1848/1051/6303
SESTO_RESPONSE_TO_UV_C2	53	0.556415	1.80837	0.00443459	0.0215857	0.0138044	2272	tags=36%, list=12%, signal=32%	306/11254/7020/7739/2065/9322/7264/2152/1525/1846/2195/5782/182/5359/7328/7082/7150/147179/10213
DURCHDEWALD_SKIN_CARCINOGENESIS_DN	256	0.441713	1.80894	0.00255102	0.0149503	0.00956095	3286	tags=34%, list=17%, signal=28%	1830/5655/3783/4233/3909/1382/7498/9957/6590/54716/3655/10276/10205/6713/56937/4645/7045/5743/7534/79695/4084/3161/2059/8412/54101/1500/5058/3157/334/80223/154141/23767/57619/22822/57154/5366/10804/831/5899/51274/123099/7171/342184/5782/7162/56287/55432/84280/9991/10765/644815/6788/5291/5597/2683/5269/10056/116984/3959/25921/50814/10512/10904/4363/7975/286826/54751/8540/57403/960/1316/861/9448/78…
COLLER_MYC_TARGETS_UP	23	0.665518	1.80911	0.00219298	0.0149503	0.00956095	3412	tags=74%, list=18%, signal=61%	1164/205/6566/445/3068/3329/5437/191/50486/10131/4691/2091/7037/10105/2821/10135/80273
TIEN_INTESTINE_PROBIOTICS_6HR_UP	50	0.558937	1.80941	0.00436681	0.0215857	0.0138044	4625	tags=50%, list=24%, signal=38%	688/54575/221/3303/2597/5230/23231/5478/60/6187/6223/7316/23196/6229/6157/6137/6175/567/6170/5862/8073/1984/27297/3146/101410538
DORN_ADENOVIRUS_INFECTION_12HR_DN	30	0.62688	1.80948	0.00224719	0.0149503	0.00956095	1663	tags=40%, list=9%, signal=37%	1999/7153/51330/1294/1942/8870/2274/25825/595/9618/8942/51474
REACTOME_G1_S_SPECIFIC_TRANSCRIPTION	29	0.630895	1.80974	0.00222222	0.0149503	0.00956095	3123	tags=48%, list=17%, signal=40%	7083/983/6241/990/1869/81620/8318/7298/3065/898/5111/286826/993/4998
REACTOME_APC_C:CDC20_MEDIATED_DEGRADATION_OF_CYCLIN_B	23	0.666014	1.81046	0.00219298	0.0149503	0.00956095	598	tags=17%, list=3%, signal=17%	11065/991/983/891
REACTOME_LAMININ_INTERACTIONS	30	0.62767	1.81176	0.00224719	0.0149503	0.00956095	369	tags=27%, list=2%, signal=26%	3914/3918/3691/3909/3675/1294/3673/3655
REACTOME_CYCLIN_A_B1_B2_ASSOCIATED_EVENTS_DURING_G2_M_TRANSITION	25	0.655963	1.81179	0.00221239	0.0149503	0.00956095	4507	tags=72%, list=24%, signal=55%	5347/2305/983/9133/9088/891/890/995/1022/1017/4331/994/993/7465/51400/5520/5518/7514
KAPOSI_LIVER_CANCER_MET_UP	18	0.690681	1.81394	0.00207469	0.0149503	0.00956095	3132	tags=56%, list=17%, signal=46%	3159/55785/1164/4188/29923/5595/10487/10095/3688/308
DOANE_BREAST_CANCER_CLASSES_DN	32	0.613254	1.81469	0.00221239	0.0149503	0.00956095	1376	tags=31%, list=7%, signal=29%	3868/55612/5329/1515/6696/6624/6566/1824/5366/8543
REACTOME_REGULATION_OF_EXPRESSION_OF_SLITS_AND_ROBOS	171	0.465641	1.81486	0.00245098	0.0149503	0.00956095	5370	tags=60%, list=28%, signal=43%	6192/5721/5696/26986/5698/5720/6132/116832/7979/6923/5699/1605/5719/5686/6187/6223/10213/200916/51065/6227/6159/7316/5707/1981/6158/5684/5710/5706/6173/5688/6921/5702/6229/2935/5687/5685/9939/6157/6141/6181/6188/6176/5713/10921/25873/6137/5691/5704/6175/6142/6217/5682/6136/6170/6166/2197/4116/6209/55110/11224/5690/6165/9045/6156/6160/5714/5692/5709/5715/3921/5695/5693/6152/6167/10197/6134/6235/57…
BHAT_ESR1_TARGETS_VIA_AKT1_UP	278	0.437838	1.81629	0.00242131	0.0149503	0.00956095	2812	tags=35%, list=15%, signal=30%	26579/5655/6337/6513/5307/7032/771/27134/3099/51195/9536/79083/2317/11033/3860/221/116844/7739/7869/53834/3291/6820/339366/8870/3866/2274/57834/595/9518/3241/27290/79180/78999/8553/91683/84842/990/6461/29128/9424/9249/2288/58495/11135/51702/23541/9401/8428/25987/64761/10298/55092/123099/84879/7162/84270/2526/677/80139/51659/389792/7052/285489/55806/56893/6804/8312/22904/5833/6242/404550/2683/2328…
REACTOME_ACTIVATION_OF_ATR_IN_RESPONSE_TO_REPLICATION_STRESS	37	0.596688	1.81639	0.00226244	0.0149503	0.00956095	4449	tags=62%, list=24%, signal=48%	990/4173/8318/995/4171/23594/55388/1111/1017/5984/4176/5883/993/4999/6119/4998/5982/63967/5985/4175/84515/10926/5000
REACTOME_CELL_CELL_COMMUNICATION	129	0.485279	1.81705	0.0023753	0.0149503	0.00956095	3116	tags=42%, list=17%, signal=35%	1308/51208/3914/3918/3691/1001/81607/3909/1364/3728/5339/3655/1366/7408/84612/50848/9076/23607/999/977/137075/3861/6714/1015/81/92359/3852/1500/5584/1495/9069/283/729238/10207/5819/60/5829/56288/5291/5818/8826/8573/54751/64398/9071/8976/6711/8935/71/4690/87/5747/23562/3688
SHETH_LIVER_CANCER_VS_TXNIP_LOSS_PAM1	252	0.444397	1.81921	0.00251889	0.0149503	0.00956095	2434	tags=32%, list=13%, signal=28%	7032/8612/128239/3875/3675/10509/55165/79669/991/7153/4751/3710/1476/7408/64285/50848/9076/113130/5328/23607/307/6535/928/977/54997/83442/54541/79644/3832/1179/3280/9414/5916/84501/51192/6659/9260/27076/10188/8915/5831/10413/57619/642273/10008/51278/60370/10226/26227/10447/123099/27338/8824/4000/286676/5050/53630/382/954/7052/440026/644815/128414/23597/10383/6238/57761/54682/8507/666/11344/10051/…
HALMOS_CEBPA_TARGETS_DN	45	0.578222	1.82198	0.00226757	0.0149503	0.00956095	1541	tags=33%, list=8%, signal=31%	6337/1364/1999/2065/2886/10903/2150/5328/976/10140/8412/3280/4091/11221/7022
VIETOR_IFRD1_TARGETS	20	0.684449	1.82217	0.00211864	0.0149503	0.00956095	748	tags=40%, list=4%, signal=38%	3855/1382/7083/10406/6696/10682/9232/4488
PUJANA_BRCA2_PCC_NETWORK	412	0.425055	1.82242	0.00268097	0.015151	0.00968933	3919	tags=40%, list=21%, signal=32%	11065/22974/4288/991/7153/1063/2305/983/2051/6241/9787/9133/2769/4605/1164/10024/23607/699/3833/891/9833/6790/890/9232/11130/11004/9928/990/2222/3832/3161/1062/701/2195/9768/4173/1869/3157/81620/7272/1058/2175/9700/10635/9212/10403/9837/8318/995/23397/2146/10615/4171/1033/4085/4001/1663/51512/8438/25804/6732/80777/6491/899/55215/1841/27338/9986/839/11335/1111/22913/6628/9585/10733/1138/9685/7298/…
SIMBULAN_UV_RESPONSE_IMMORTALIZED_DN	31	0.625637	1.82392	0.00225225	0.0149503	0.00956095	2124	tags=45%, list=11%, signal=40%	1001/3909/5339/3673/3655/6241/3397/2069/595/1956/79026/2335/1849/10512
MEINHOLD_OVARIAN_CANCER_LOW_GRADE_DN	18	0.694776	1.82469	0.00207469	0.0149503	0.00956095	4113	tags=61%, list=22%, signal=48%	22974/9133/9928/1072/6628/6772/4690/6009/65005/5885/4175
PUJANA_BREAST_CANCER_LIT_INT_NETWORK	100	0.50935	1.8265	0.00233645	0.0149503	0.00956095	4062	tags=45%, list=22%, signal=36%	5347/983/2274/891/595/6790/890/4088/701/1869/2175/995/5888/9111/8543/7979/1111/5970/10362/3065/898/6667/1017/580/5984/5606/5932/571/5883/6772/993/6119/1457/2177/4436/4869/5982/7283/63967/3726/641/25920/11200/3838/1263
LY_AGING_PREMATURE_DN	29	0.636761	1.82657	0.00222222	0.0149503	0.00956095	3131	tags=62%, list=17%, signal=52%	2305/4605/1163/9088/5743/11004/1058/4171/899/7298/580/3148/994/3576/2091/5055/4314/5902
PID_P53_DOWNSTREAM_PATHWAY	136	0.484497	1.82688	0.00239808	0.0149503	0.00956095	2590	tags=32%, list=14%, signal=27%	5268/2810/6273/1969/4233/22943/7039/64065/79370/55240/27113/891/6696/9518/54541/8797/598/3486/578/8795/1869/9540/29108/3732/5366/6890/5371/1956/839/843/1907/6667/3976/5111/7421/8793/3169/51065/7161/8626/9448/64326/333926
REACTOME_G0_AND_EARLY_G1	27	0.642557	1.82737	0.00214592	0.0149503	0.00956095	2734	tags=44%, list=14%, signal=38%	7153/983/4605/890/990/1869/3065/898/5111/1017/286826/993
SHAFFER_IRF4_TARGETS_IN_ACTIVATED_B_LYMPHOCYTE	76	0.52869	1.82786	0.00221729	0.0149503	0.00956095	3407	tags=49%, list=18%, signal=40%	3099/3949/51330/3939/6713/6307/6790/2222/976/8407/9569/7416/5230/4860/3417/29923/6319/6732/3845/7422/230/54836/8894/3145/6482/10606/191/54205/6675/1595/3638/2618/55660/3895/3156/52/4598
DITTMER_PTHLH_TARGETS_UP	110	0.503283	1.82811	0.00235294	0.0149503	0.00956095	4147	tags=47%, list=22%, signal=37%	11065/1893/983/64866/2150/1164/5328/374/8553/8673/51809/27347/311/2195/301/4041/7167/83461/1174/51170/7417/10765/7298/182/1472/476/56034/5984/5870/54205/994/51734/378/10440/57403/7384/10318/682/308/10921/1175/23658/93974/4218/3911/11163/10714/5985/1499/2773/8703/8879
BOYAULT_LIVER_CANCER_SUBCLASS_G6_DN	19	0.692623	1.82921	0.00210084	0.0149503	0.00956095	2554	tags=58%, list=14%, signal=50%	6385/3949/89870/51599/999/3280/6574/3628/6238/8743/54918
SESTO_RESPONSE_TO_UV_C0	106	0.504595	1.82937	0.00230415	0.0149503	0.00956095	4109	tags=44%, list=22%, signal=35%	5652/4070/3557/7850/133/51599/2065/3303/5768/5317/9518/23204/1824/9618/4860/301/6318/6890/5119/1022/5111/4697/10808/5684/8655/3840/11140/7037/6921/1965/8878/5685/10105/573/23471/740/2959/3052/10857/5440/6418/7555/6670/6016/3838/7189/1211
FONTAINE_PAPILLARY_THYROID_CARCINOMA_UP	66	0.541521	1.82964	0.00222717	0.0149503	0.00956095	1965	tags=38%, list=10%, signal=34%	8796/1001/6277/3875/8714/1893/6281/10644/6590/5002/2118/8645/120224/9076/54997/6696/2017/1495/9314/7764/7414/898/6637/7469/3959
YUAN_ZNF143_PARTNERS	21	0.683899	1.83221	0.00213675	0.0149503	0.00956095	4506	tags=52%, list=24%, signal=40%	22974/4008/51203/8607/9053/25879/23560/7528/10284/8629/22938
SWEET_KRAS_ONCOGENIC_SIGNATURE	88	0.518046	1.83272	0.00229885	0.0149503	0.00956095	2337	tags=34%, list=12%, signal=30%	7138/7262/3958/3875/3856/3934/7264/7408/634/4188/7045/595/3606/6928/481/22822/26986/10447/6132/5445/23246/1848/5663/5050/8312/6558/5092/6187/10945/7873
DELACROIX_RARG_BOUND_MEF	356	0.432524	1.83272	0.00258398	0.0149503	0.00956095	2998	tags=32%, list=16%, signal=27%	8000/10232/9052/5307/5652/90019/771/113026/1382/3557/362/64063/6275/3159/11065/29984/259173/4071/218/127534/726/64423/51330/2709/4751/26031/64787/1942/50848/6237/2069/55715/595/9518/9572/8553/6624/84842/5493/6714/2017/3209/8407/54509/1846/389/10312/9249/79007/4091/5916/1357/1356/8694/4017/9260/5315/23529/10413/301/60370/754/10039/3206/1848/29775/1051/1488/128272/29957/7422/6303/5119/84727/2335/82…
FARMER_BREAST_CANCER_BASAL_VS_LULMINAL	324	0.434695	1.83311	0.00249377	0.0149503	0.00956095	2124	tags=29%, list=11%, signal=26%	3868/7031/23650/3853/6337/688/10103/10551/771/7033/1728/79083/3875/3856/25803/10644/10753/22974/9957/7020/133/80736/2950/991/5002/22977/2305/11226/10205/8821/55240/51442/5266/699/9620/9833/5214/9603/2568/374/5317/9518/79170/24137/9232/9928/6566/51809/10140/3315/1824/81031/55930/7272/7368/1058/10635/10403/114908/3693/54884/55388/26227/3854/2203/6732/6491/8543/54502/86/6374/7162/1051/1111/51097/951…
DOANE_BREAST_CANCER_ESR1_DN	47	0.574069	1.83362	0.00441501	0.0215857	0.0138044	1378	tags=36%, list=7%, signal=34%	10232/3868/8581/2707/6590/4316/10643/56938/51442/2568/1824/445/3852/7368/8190/3854/1956
KORKOLA_TERATOMA	41	0.596587	1.8341	0.00229358	0.0149503	0.00956095	1120	tags=39%, list=6%, signal=37%	10551/7103/4071/3934/991/9787/1164/891/6790/11130/26298/2059/5327/83540/1058/5284
BHAT_ESR1_TARGETS_NOT_VIA_AKT1_UP	210	0.458253	1.83466	0.0025	0.0149503	0.00956095	2706	tags=33%, list=14%, signal=28%	26579/5655/6337/6513/5307/7032/7262/771/27134/3099/51195/9536/79083/2317/116844/7739/7869/53834/6820/5029/64699/339366/3866/2274/57834/595/27290/54498/8553/84842/990/6461/29128/9424/9249/26010/2288/58495/51702/23541/55388/25987/55092/123099/84879/94121/84270/80139/389792/7052/285489/55806/8312/404550/2683/23286/5373/57475/79709/29948/4477/51388/2296/55686/158046/6478/79000/2444/115708
RAHMAN_TP53_TARGETS_PHOSPHORYLATED	21	0.684971	1.83508	0.00213675	0.0149503	0.00956095	4631	tags=71%, list=25%, signal=54%	2950/301/26227/5464/60/7170/10856/4830/10130/908/5093/55110/3191/5223/51699
SESTO_RESPONSE_TO_UV_C3	19	0.695184	1.83598	0.00210084	0.0149503	0.00956095	2812	tags=63%, list=15%, signal=54%	7262/3304/8870/6662/5743/5366/4615/54205/30851/3576/390/1965
BARIS_THYROID_CANCER_DN	58	0.558301	1.83617	0.00223714	0.0149503	0.00956095	3383	tags=43%, list=18%, signal=35%	688/1001/2125/8714/11065/4008/2886/2064/307/595/95/9414/3068/1495/1848/7414/6636/8743/805/960/4738/3659/4218/29941/1460
SWEET_KRAS_TARGETS_DN	61	0.554677	1.83649	0.0022779	0.0149503	0.00956095	3495	tags=54%, list=19%, signal=44%	4680/22943/8091/218/7851/6241/84612/2150/8061/1846/5757/22822/79849/2049/3845/6374/955/10419/54830/7011/6183/8793/57799/9351/7378/7804/10969/6749/813/7404/7472/51728/10123
DER_IFN_BETA_RESPONSE_UP	101	0.511041	1.8375	0.00234192	0.0149503	0.00956095	4007	tags=48%, list=21%, signal=38%	8638/3673/5329/8754/8061/9636/389/684/4939/143/5696/9111/5698/5366/2537/6890/5720/5371/7979/841/3430/4599/3437/5699/4600/10561/6737/5359/8826/54205/6742/5530/8519/6772/8763/9188/3659/573/10947/567/3433/27000/3107/6726/8566/10379/2114/9830
LANDIS_ERBB2_BREAST_PRENEOPLASTIC_UP	18	0.700179	1.83888	0.00207469	0.0149503	0.00956095	3090	tags=50%, list=16%, signal=42%	3783/3934/1829/6241/3732/1111/391059/58527/7163
REACTOME_MET_ACTIVATES_PTK2_SIGNALING	30	0.637523	1.8402	0.00224719	0.0149503	0.00956095	723	tags=27%, list=4%, signal=26%	3914/3918/4233/3909/3675/3673/1301/6714
GOLDRATH_ANTIGEN_RESPONSE	339	0.436198	1.84045	0.00259067	0.0149503	0.00956095	2435	tags=35%, list=13%, signal=31%	55630/6277/3958/6282/128239/54443/6281/4288/302/6590/822/991/5347/7153/7083/983/1894/4751/64065/6241/79887/9787/259266/9133/6713/8870/2274/1164/113130/101/1163/27346/332/10112/699/307/51203/9055/3833/891/10682/55143/6790/79180/890/24137/8553/11004/7295/990/55723/3832/2597/10809/29127/4257/29089/5355/824/9768/4173/80005/1495/7272/51514/1058/10635/9212/6856/8318/995/23397/2146/301/5888/1033/6284/40…
DORN_ADENOVIRUS_INFECTION_32HR_DN	39	0.599898	1.84058	0.00227273	0.0149503	0.00956095	965	tags=31%, list=5%, signal=29%	5268/3880/1969/51330/1294/1942/8870/2274/595/3861/8412/9618
CHEMNITZ_RESPONSE_TO_PROSTAGLANDIN_E2_DN	363	0.433639	1.84116	0.00259067	0.0149503	0.00956095	2913	tags=33%, list=15%, signal=28%	10232/3855/54869/6337/5652/2525/10103/4233/1364/27134/347735/647024/346389/1999/4008/6590/3934/54716/6768/64129/80736/5357/135932/2591/57228/2528/1829/80162/1366/83451/8645/144100/7430/10406/11145/130340/27237/2041/8842/6469/147798/1525/79170/7348/5493/823/54843/4584/1040/2628/26010/9414/29841/311/2195/2762/3269/91862/100506658/54810/9314/9069/58516/23231/23529/1021/55466/143/128218/114783/55561/…
CROONQUIST_NRAS_VS_STROMAL_STIMULATION_DN	93	0.51842	1.84145	0.0022779	0.0149503	0.00956095	1388	tags=40%, list=7%, signal=37%	11065/22974/4288/991/7083/2305/983/9787/9133/3397/8870/1163/10024/891/7045/6790/890/6624/9232/11004/990/6192/3486/3280/1062/6574/1058/10635/9212/8318/2146/9401/4171/9824/1033/23645/899
REACTOME_CHK1_CHK2_CDS1_MEDIATED_INACTIVATION_OF_CYCLIN_B:CDK1_COMPLEX	13	0.760773	1.84174	0.00616016	0.0277029	0.0177165	1508	tags=46%, list=8%, signal=42%	2810/983/891/7534/995/1111
LOPEZ_MESOTHELIOMA_SURVIVAL_WORST_VS_BEST_UP	14	0.745606	1.8451	0.00626305	0.0279502	0.0178746	3107	tags=71%, list=16%, signal=60%	2317/51155/595/54621/995/55257/84722/23576/55558/11332
CHICAS_RB1_TARGETS_LOW_SERUM	91	0.520348	1.84541	0.00228833	0.0149503	0.00956095	4254	tags=54%, list=23%, signal=42%	5307/9768/4173/1978/81620/4493/51514/55635/51192/6659/83879/4001/1956/6923/6628/134285/4496/7298/6637/10535/7791/3070/140823/6635/1329/1340/9551/387103/100128731/4710/746/521/401466/6227/401115/6173/6119/7468/5441/6166/195828/5271/517/79968/9556/4694/4175/100131801/4494
PHONG_TNF_RESPONSE_NOT_VIA_P38	335	0.436991	1.84583	0.00253807	0.0149503	0.00956095	2430	tags=31%, list=13%, signal=28%	9052/3918/1969/7262/55765/771/9536/5468/28231/6385/3949/3294/64423/9322/3303/7851/3673/64866/10276/3304/22885/5329/1942/8821/6662/56938/9076/27242/5328/6934/4188/11282/10626/25841/9603/1525/79180/54498/8553/6461/4088/976/54509/4312/7855/3280/2288/8795/3321/965/24139/4017/23268/6659/90861/3337/481/2634/4597/7127/9601/51312/51278/26872/9111/9144/5698/64761/8767/6732/1956/54502/1051/6672/9334/9991/1…
DAUER_STAT3_TARGETS_DN	46	0.583658	1.84636	0.00224215	0.0149503	0.00956095	2665	tags=50%, list=14%, signal=43%	8638/3429/3303/3304/27346/54809/9636/3248/4940/55601/3310/4939/64761/7098/3430/4599/3437/10561/64135/8743/85363/8519/6772
REACTOME_DEFENSINS	52	0.571422	1.84701	0.00449438	0.0217221	0.0138917	471	tags=6%, list=2%, signal=6%	5645/5646/1672
WALLACE_PROSTATE_CANCER_UP	20	0.694252	1.84827	0.00211864	0.0149503	0.00956095	3090	tags=55%, list=16%, signal=46%	5652/6768/7264/9518/6659/191/5530/6675/8668/5425/7163
WUNDER_INFLAMMATORY_RESPONSE_AND_CHOLESTEROL_UP	61	0.558496	1.84913	0.0022779	0.0149503	0.00956095	2795	tags=46%, list=15%, signal=39%	3868/5645/140453/3816/7033/51316/30001/1755/6566/2628/4065/684/2634/9601/5721/5696/5698/440387/840/259/5699/10561/6891/7378/6772/6372/7037/129607
JOHNSTONE_PARVB_TARGETS_2_UP	139	0.488405	1.8492	0.00239808	0.0149503	0.00956095	3406	tags=39%, list=18%, signal=32%	9052/26499/8638/3429/6282/3875/3856/1893/4061/51599/11226/2069/977/9636/5920/10555/4088/598/5327/4192/55601/6813/334/5315/1072/23231/57175/53827/5819/60/3437/22904/23043/7791/23286/3489/55861/133418/55611/54918/9246/10267/8519/6173/51614/811/682/71/9034/6576/567/3433/3106/7335
VERNELL_RETINOBLASTOMA_PATHWAY_UP	70	0.545983	1.85013	0.00228311	0.0149503	0.00956095	3847	tags=59%, list=20%, signal=47%	3775/6241/113130/27346/9833/55723/2059/4173/2175/10635/2146/9401/64105/139886/55038/157570/898/56704/5111/580/29028/5984/10036/3148/6941/2237/6240/7884/4176/993/55536/7112/63901/7443/55120/10714/195828/63967/1026/641/1870
PUJANA_XPRSS_INT_NETWORK	166	0.477036	1.85024	0.00241546	0.0149503	0.00956095	3262	tags=37%, list=17%, signal=31%	11065/4288/991/7153/2305/983/4605/3833/6790/890/11130/3161/9768/4173/1058/9700/10635/9212/10403/9837/2146/4171/4085/4001/51512/8438/899/55215/27338/11335/6628/9585/10733/9735/6626/5111/10051/10606/23200/5984/10036/3148/23173/7150/5932/7374/6240/8667/26574/84901/7468/1457/22934/6929/4690/9918/6627/9184/7112/4436/5426/3150
REACTOME_REGULATION_OF_RAS_BY_GAPS	68	0.548474	1.85114	0.00228833	0.0149503	0.00956095	5370	tags=72%, list=28%, signal=52%	8437/5721/5696/5698/5720/3845/7979/5699/5719/5686/10213/7316/5707/5684/5710/5706/5688/5702/22821/5687/4893/5685/5713/5691/5704/5682/161742/5690/200734/5921/5714/5692/5709/5715/3265/5695/5693/10197/9462/5708/5717/9491/5700/5701/9978/5683/6233/9861/23198
SASAKI_ADULT_T_CELL_LEUKEMIA	163	0.477258	1.85238	0.00238663	0.0149503	0.00956095	2383	tags=37%, list=13%, signal=33%	3783/11065/254531/22974/4288/302/7020/5347/7153/1063/7083/2305/9787/1718/9133/2274/891/9636/890/9232/11130/11004/9928/3832/701/10538/9768/481/1033/4939/9111/3417/5499/1265/1741/5437/10039/51097/5074/7298/27243/3065/11235/6667/26292/10651/5111/3669/580/5744/10095/3148/6183/10221/518/2108/23423/5052/4642/8323/4830
WANG_CISPLATIN_RESPONSE_AND_XPC_UP	180	0.471744	1.85301	0.00246305	0.0149503	0.00956095	2905	tags=38%, list=15%, signal=33%	7031/4680/1364/5349/8537/306/3875/3856/11065/2582/5644/4071/7869/983/10643/57211/63910/9235/634/332/928/999/374/6790/3861/8744/9928/3832/4312/3280/9768/3157/7272/5831/5888/4258/4085/9319/1663/629/11322/4051/8906/83463/10535/2224/6573/10051/3835/57475/3148/6184/11001/7873/3484/2237/79017/55210/10452/3638/9894/7058/440145/1622/23093/9688/6119/23310/3703
LI_LUNG_CANCER	41	0.602766	1.85309	0.00229358	0.0149503	0.00956095	1088	tags=32%, list=6%, signal=30%	3880/3872/6273/3875/3856/4316/2950/7534/3832/3315/3486/5230/5879
KEGG_PYRIMIDINE_METABOLISM	97	0.51673	1.85411	0.00226757	0.0149503	0.00956095	4279	tags=47%, list=23%, signal=37%	978/7083/6241/4907/377841/57804/4860/957/5437/1841/4831/7298/955/51727/30833/124583/1890/51251/4830/6240/7378/3704/5427/129607/30834/56655/5558/5425/5441/51082/5426/5424/22978/56474/51728/5439/87178/7084/10714/1635/5440/7371/4832/23649/1503/29922
XU_CREBBP_TARGETS_UP	21	0.692274	1.85465	0.00213675	0.0149503	0.00956095	1865	tags=33%, list=10%, signal=30%	6277/116844/57146/8842/2635/4171/57633
DER_IFN_GAMMA_RESPONSE_UP	71	0.545646	1.85514	0.00230415	0.0149503	0.00956095	3863	tags=48%, list=20%, signal=38%	8061/27113/9636/389/578/684/5696/9111/5698/5366/6890/5720/5371/7979/7004/841/3430/3437/3601/5699/6737/5359/54205/6742/5530/8519/6772/3659/573/567/3433/3107/6726/10379
OLSSON_E2F3_TARGETS_DN	33	0.620146	1.85632	0.00217865	0.0149503	0.00956095	1938	tags=42%, list=10%, signal=38%	114569/22974/55971/5347/983/144501/6241/4605/858/9232/5757/4085/4496/5111
PRAMOONJAGO_SOX4_TARGETS_UP	51	0.574163	1.85874	0.00441501	0.0215857	0.0138044	2675	tags=47%, list=14%, signal=41%	9052/133/8870/55785/205/9518/8553/1846/23764/8780/51141/7162/677/7422/4615/2000/65981/57761/10616/901/55818/79155/81603/390
MOOTHA_VOXPHOS	87	0.529288	1.85905	0.00230947	0.0149503	0.00956095	6390	tags=76%, list=34%, signal=50%	598/4709/9377/4697/509/1537/1329/1340/9551/1337/1345/518/7388/54205/4710/521/7384/27089/1349/4725/514/4706/7385/4728/4720/1327/4704/6391/6389/6392/513/517/4717/1351/4694/4722/10476/4705/4713/4726/6390/1355/1350/9167/29796/617/4695/539/516/4719/4711/55374/4700/506/10632/6834/4696/4707/7381/4712/4724/1347/4718/1528/1155/522
GRANDVAUX_IFN_RESPONSE_NOT_VIA_IRF3	15	0.737605	1.86474	0.00617284	0.0277332	0.0177359	2999	tags=73%, list=16%, signal=62%	2634/2537/3665/3430/4599/4600/10410/3669/8519/6772/3659
KOHOUTEK_CCNT1_TARGETS	47	0.58397	1.86524	0.00441501	0.0215857	0.0138044	1979	tags=38%, list=10%, signal=34%	2810/113146/3691/55630/4070/3875/84419/1212/2274/2877/3861/9961/5225/6284/727957/826/80270/130589
SCHUETZ_BREAST_CANCER_DUCTAL_INVASIVE_DN	83	0.536485	1.86754	0.00230415	0.0149503	0.00956095	1224	tags=28%, list=6%, signal=26%	6337/3909/27134/79083/10158/53836/4071/2065/55040/64065/83451/1672/8842/9620/374/9518/3861/51809/4192/222/80223/5792/51278
DER_IFN_ALPHA_RESPONSE_UP	73	0.544317	1.86867	0.00226244	0.0149503	0.00956095	4007	tags=53%, list=21%, signal=42%	8638/27113/9636/389/684/4939/5696/9111/5698/5366/2537/6890/5720/5371/7979/7004/841/3430/4599/3437/5699/4600/10561/6737/5359/54205/6742/5530/8519/6772/8763/3659/573/567/3107/6726/8566/10379/9830
BIDUS_METASTASIS_UP	210	0.467101	1.87009	0.0025	0.0149503	0.00956095	4777	tags=46%, list=25%, signal=35%	11065/22974/1063/983/1894/6241/9787/9133/6713/332/699/51203/891/6790/890/24137/4084/990/55723/3832/5033/29127/57082/55872/7416/55635/23186/1058/51012/23397/8428/4085/55388/4001/219988/55215/7546/1111/64795/10733/90417/166929/7298/6611/54821/3320/10051/11169/5984/51582/1832/55839/57403/2237/6240/6632/9188/7037/6749/9793/7468/6715/1054/4893/51053/55161/1434/10728/8683/92140/5093/3184/54994/8458/173…
SCHLOSSER_MYC_TARGETS_REPRESSED_BY_SERUM	149	0.489717	1.87014	0.00242718	0.0149503	0.00956095	5680	tags=60%, list=30%, signal=42%	3099/7295/6566/3336/3329/4085/86/11335/1051/64795/90355/55699/8531/9538/10434/509/6636/10213/54205/6742/11222/22948/27230/23196/3704/3251/9804/5901/1965/10196/9688/10797/10130/10939/5203/7023/79053/9184/5902/10728/10541/6599/6741/10694/52/1662/27000/51491/55854/689/9694/10576/9221/10915/22868/1635/7555/91/1454/29889/3838/2271/7528/51499/5223/3093/26135/9100/25983/55905/10269/1653/3178/8624/8883/5…
REACTOME_METABOLISM_OF_NUCLEOTIDES	96	0.521839	1.87183	0.00225225	0.0149503	0.00956095	4237	tags=53%, list=22%, signal=41%	978/7498/7083/6241/4907/377841/205/7295/4860/2987/353/957/471/1841/4831/954/7298/79077/955/10606/51727/30833/1890/51251/4830/6240/7378/1716/4521/2618/3704/8833/3251/8226/3615/55270/9615/132/11164/22978/56474/51292/7084/204/1635/3614/7371/4832/10591/1503/100
ZHAN_MULTIPLE_MYELOMA_SUBGROUPS	30	0.648652	1.87233	0.00224719	0.0149503	0.00956095	6027	tags=73%, list=32%, signal=50%	1163/990/2146/7298/7341/10036/10213/1965/6631/4528/5425/5902/4436/1460/10575/2339/4150/2280/5591/10438/7336/7360
REACTOME_RRNA_MODIFICATION_IN_THE_NUCLEUS_AND_CYTOSOL	60	0.563947	1.87314	0.00226244	0.0149503	0.00956095	5972	tags=63%, list=32%, signal=43%	55505/9136/10607/6187/115939/54433/27042/2091/25879/55127/114049/55226/51602/51504/84128/10813/84916/10885/55651/1736/23160/9790/92856/51077/79050/27341/51202/4839/8602/11056/54555/6201/10436/57647/55272/56902/6208/22984
SMITH_TERT_TARGETS_UP	141	0.494974	1.87317	0.00239808	0.0149503	0.00956095	4154	tags=47%, list=22%, signal=37%	688/1969/1604/4072/1301/101/5743/7050/6510/990/6783/2059/23186/5831/1033/7923/8543/1956/27338/650/196/2000/6788/1537/7251/6992/2961/7150/23016/2937/2673/1716/7718/2297/5710/1965/9793/10797/1054/10953/10782/1029/6627/5713/7936/2120/6472/1662/740/11273/3184/6993/3309/9929/5277/11007/29889/3588/6917/1491/5520/1611/9255/5715/4864/2627
OUELLET_CULTURED_OVARIAN_CANCER_INVASIVE_VS_LMP_UP	67	0.555771	1.87497	0.00227273	0.0149503	0.00956095	3514	tags=46%, list=19%, signal=38%	3855/3880/306/3875/3856/2582/822/653145/1164/1525/1846/3217/481/6717/8543/10099/898/330/191/8766/5710/8226/8836/5425/7965/1434/2314/22928/7132/4728/2959
BIOCARTA_EFP_PATHWAY	16	0.73243	1.87543	0.00207469	0.0149503	0.00956095	2027	tags=50%, list=11%, signal=45%	2810/983/9133/891/1021/57154/1022/1017
YAO_TEMPORAL_RESPONSE_TO_PROGESTERONE_CLUSTER_14	135	0.496997	1.87613	0.00238095	0.0149503	0.00956095	5508	tags=67%, list=29%, signal=48%	26472/27346/51012/5315/9601/54820/5464/1841/64841/7298/7414/79077/3654/8531/130589/871/23173/57222/6184/2923/3069/8815/4830/5707/1981/6634/56005/10960/10969/2091/54815/55173/7203/54663/9091/5550/6627/7163/5902/26003/5691/10694/27000/79095/2584/1509/9343/1388/328/4311/55651/9950/10915/10430/6182/6746/10652/6747/29927/51428/6917/581/56950/5693/9040/396/10010/51522/7922/221545/54888/133619/220988/65…
LEONARD_HYPOXIA	43	0.600351	1.87623	0.00222717	0.0149503	0.00956095	2377	tags=42%, list=13%, signal=37%	4582/6513/9123/7039/2152/1942/205/5214/226/54541/8553/5033/136/5230/7422/901/55818/1649
REACTOME_MET_PROMOTES_CELL_MOTILITY	41	0.610606	1.8772	0.00229358	0.0149503	0.00956095	1088	tags=24%, list=6%, signal=23%	3914/84951/3918/4233/3909/3675/3673/1301/6714/5879
REACTOME_PROGRAMMED_CELL_DEATH	171	0.482384	1.88012	0.00245098	0.0149503	0.00956095	4626	tags=54%, list=25%, signal=41%	1830/2810/5339/1829/27113/999/5317/7534/8797/11035/598/9414/578/8795/1869/100506658/8428/5721/4001/5696/5698/5366/5720/5595/7979/4000/839/8717/148022/840/841/8772/5699/330/197259/5719/8743/3148/5686/7082/5580/1832/10213/54205/10134/7161/8626/51765/7316/5707/5684/5710/8655/572/5706/5688/637/5702/5687/5685/7186/5747/55075/7159/5713/7529/5691/5704/219699/5682/63967/5690/5714/581/5534/5692/5709/5715/…
REACTOME_APOPTOTIC_CLEAVAGE_OF_CELL_ADHESION_PROTEINS	11	0.817648	1.88087	0.00213675	0.0149503	0.00956095	2228	tags=73%, list=12%, signal=64%	1830/1829/999/5317/9414/100506658/7082/1832
ELVIDGE_HIF1A_AND_HIF2A_TARGETS_DN	104	0.521189	1.883	0.00232558	0.0149503	0.00956095	1730	tags=32%, list=9%, signal=29%	9052/768/113146/6513/3099/6275/51316/30001/133/112399/1944/5329/6662/3866/5768/205/8553/79644/1824/5033/3486/6676/4017/81855/5230/51129/51141/283/29923/1956/26355/7422/230
SIMBULAN_PARP1_TARGETS_DN	16	0.736014	1.8846	0.00207469	0.0149503	0.00956095	2150	tags=62%, list=11%, signal=55%	991/9133/891/6696/890/8407/27338/5111/871/3148
TOYOTA_TARGETS_OF_MIR34B_AND_MIR34C	432	0.437237	1.88482	0.00265252	0.0151369	0.00968028	3563	tags=32%, list=19%, signal=27%	4233/4061/4288/129642/83715/23657/5347/1063/2305/53834/4751/6241/3939/9743/118738/4605/27242/27346/90550/6934/51203/3833/9088/891/9833/6790/890/79170/24137/7534/11004/153768/9928/55723/3832/8407/54947/150468/1062/701/127343/79056/7368/147841/51514/91860/1058/91862/9212/219790/1729/11057/83879/5888/9824/3329/51283/4001/56992/9319/90381/157313/10207/26227/51512/8438/23012/6491/899/27338/55722/9989/…
SWEET_LUNG_CANCER_KRAS_UP	448	0.437549	1.88539	0.00273224	0.0152015	0.00972164	2404	tags=30%, list=13%, signal=27%	8000/3914/3855/4582/3918/8581/2707/7138/688/7262/4070/3958/7103/3099/5468/51703/3875/3856/54845/6382/6590/3934/116844/3775/652/2706/2591/79887/3304/29842/1476/7264/1366/3939/4072/2152/7408/57648/92840/1164/1192/26472/634/6692/4188/307/7045/928/595/7050/374/6696/8553/8744/6566/8673/81/2597/10140/161291/10809/1824/51304/92359/23491/3486/3606/5355/2288/4065/1535/6813/7429/5230/5315/5792/10263/2023/6…
QI_HYPOXIA	126	0.50489	1.88551	0.0023753	0.0149503	0.00956095	3032	tags=44%, list=16%, signal=38%	3880/768/6513/29785/3099/2859/129642/726/133/83715/112399/1942/6713/8870/6662/205/5214/54541/8553/8744/5033/3486/5318/285973/11015/4597/26751/55502/6319/79602/3098/839/135228/5050/10435/7422/79660/55902/230/148523/84102/901/50814/25994/2961/5236/22801/1595/3638/5351/29950/6478/338557/8974/2821/3705
REACTOME_ATTENUATION_PHASE	28	0.663359	1.88573	0.00222222	0.0149503	0.00956095	2122	tags=43%, list=11%, signal=38%	3303/3304/27242/3315/2288/3310/3337/3297/162989/3320/871/10808
LOPEZ_MESOTHELIOMA_SURVIVAL_OVERALL_DN	15	0.747219	1.88904	0.00411523	0.020835	0.0133243	2994	tags=73%, list=16%, signal=62%	2317/129642/51155/4751/595/3216/100133941/54478/1289/84722/55558
WANG_METHYLATED_IN_BREAST_CANCER	35	0.626692	1.88941	0.00226757	0.0149503	0.00956095	2783	tags=49%, list=15%, signal=41%	2707/3872/1969/22943/2152/8061/9518/23764/8795/1495/6548/7791/1316/7378/993/203068/3624
NAKAMURA_METASTASIS_MODEL_DN	43	0.604773	1.89005	0.00222717	0.0149503	0.00956095	2388	tags=47%, list=13%, signal=41%	84985/26499/4923/28231/3949/10509/4583/55214/9982/205/1992/5327/81855/831/230/7035/254102/5744/960/83862
RASHI_RESPONSE_TO_IONIZING_RADIATION_2	113	0.514602	1.89187	0.002331	0.0149503	0.00956095	2412	tags=33%, list=13%, signal=29%	3880/3918/688/11187/4070/3958/3934/2065/2709/3664/11343/1366/7050/11130/8407/1824/79720/100506658/9314/6659/58516/8915/301/6284/9056/1848/23612/5970/57761/10890/330/5359/4791/5971/4793/51526/1316
SESTO_RESPONSE_TO_UV_C5	46	0.598153	1.89221	0.00224215	0.0149503	0.00956095	2844	tags=48%, list=15%, signal=41%	3691/8091/6385/3949/6461/9748/3280/23186/9989/7525/9685/182/4363/23173/8826/5932/5586/2131/11059/23196/6772/9793
STONER_ESOPHAGEAL_CARCINOGENESIS_UP	37	0.62178	1.89277	0.00226244	0.0149503	0.00956095	4396	tags=54%, list=23%, signal=42%	7039/255738/54474/699/2017/9768/23645/11235/5358/5606/10959/1176/55330/5687/52/5861/9097/90864/84317/5817
SCHAEFFER_PROSTATE_DEVELOPMENT_48HR_UP	432	0.439083	1.89277	0.00265252	0.0151369	0.00968028	2443	tags=30%, list=13%, signal=27%	8000/57402/3855/3880/3783/6337/3691/11187/10103/150696/4070/10551/80201/26/55107/222171/1728/9536/306/286077/57111/4061/647024/79905/1999/51316/3775/4316/726/64129/57214/79098/7869/57228/7113/768239/26509/56262/7286/29842/4072/3397/11005/6662/3866/2877/7464/4907/634/27237/6692/89944/51090/9914/4188/999/6469/54997/147798/54498/137075/6549/6510/7984/8673/3248/1179/598/6783/222/202915/9249/79720/726…
SCIBETTA_KDM5B_TARGETS_DN	77	0.547072	1.89292	0.00225734	0.0149503	0.00956095	2762	tags=43%, list=15%, signal=37%	6337/7153/983/1894/9787/1718/6662/891/2036/6790/9636/11004/3161/701/55872/7272/10403/23397/83461/7923/4828/4496/10765/23333/6637/3959/11339/5358/3638/6632/10625/6801/203068
KEGG_BASE_EXCISION_REPAIR	33	0.632403	1.893	0.00217865	0.0149503	0.00956095	5210	tags=73%, list=28%, signal=53%	57804/143/10039/5423/5111/4350/4913/23583/7374/2237/55247/5427/56655/5425/5426/5424/328/10714/27301/7515/3978/3146/54107/10038
REACTOME_INFLUENZA_INFECTION	154	0.489599	1.89373	0.00232558	0.0149503	0.00956095	6416	tags=64%, list=34%, signal=43%	3303/9636/6192/402569/6132/5437/116832/3320/55706/6187/6223/79023/200916/2963/51065/6227/6159/6158/3840/5901/6173/6229/9688/811/6157/6141/6181/5441/6188/6176/25873/6137/6175/6142/6217/6136/6170/57122/6166/2197/5439/6209/11224/5440/6165/9045/6156/6160/129401/3838/3921/1211/6152/8106/6167/6134/6235/6230/6123/6222/51121/7514/5610/81929/6168/6193/6210/6155/8480/821/6218/6231/6161/6207/6396/5438/6201/…
REACTOME_ACTIVATION_OF_THE_MRNA_UPON_BINDING_OF_THE_CAP_BINDING_COMPLEX_AND_EIFS_AND_SUBSEQUENT_BINDING_TO_43S	60	0.570384	1.89452	0.00226244	0.0149503	0.00956095	5976	tags=72%, list=32%, signal=49%	6192/1978/26986/8894/6187/10480/6223/51065/6227/8667/8662/1981/8668/1965/6229/1968/6188/6217/8663/2197/6209/8669/3646/3921/7458/6235/6230/6222/6193/6210/8664/6218/6231/6207/6201/6224/6233/8661/1974/6205/27335/6208/8666
SCHAVOLT_TARGETS_OF_TP53_AND_TP63	15	0.749421	1.89461	0.00411523	0.020835	0.0133243	2043	tags=40%, list=11%, signal=36%	2810/1969/9540/5366/5111/5420
REACTOME_ASSEMBLY_OF_COLLAGEN_FIBRILS_AND_OTHER_MULTIMERIC_STRUCTURES	61	0.572479	1.89543	0.0022779	0.0149503	0.00956095	990	tags=23%, list=5%, signal=22%	1308/3914/3918/3691/3909/4316/5339/1294/3655/1301/977/1515/1300/4017
MCBRYAN_PUBERTAL_BREAST_3_4WK_UP	205	0.474692	1.89808	0.00250627	0.0149503	0.00956095	2228	tags=36%, list=12%, signal=32%	3855/3880/8581/150696/4070/3958/7103/362/55107/79083/3875/3856/8714/54845/6382/3934/133/6768/5874/51330/3664/983/7113/64866/64065/3304/29842/1604/4072/57648/120224/2266/6662/10406/634/999/9603/7050/2568/6696/3861/6624/26298/4323/9414/29841/389084/10635/79071/57619/22822/9547/4041/6319/55092/3098/7022/29957/51474/284996/230/9580/2335/525/149466/80221/23286/91768/6558/1312/27315/79885/1832
REACTOME_NUCLEOSOME_ASSEMBLY	28	0.667781	1.8983	0.00222222	0.0149503	0.00956095	3530	tags=54%, list=19%, signal=44%	55355/79682/57082/1058/64105/79019/11339/2491/387103/55839/8607/201254/54069/4869/64946
WANG_BARRETTS_ESOPHAGUS_UP	53	0.584133	1.89845	0.00443459	0.0215857	0.0138044	2153	tags=47%, list=11%, signal=42%	6286/10232/3691/64063/3675/10562/3294/5339/5967/727897/5768/57804/3965/8644/2168/11057/8857/10223/5899/760/7114/5829/11014/3669/6558
PID_INTEGRIN4_PATHWAY	11	0.82546	1.89884	0.00213675	0.0149503	0.00956095	369	tags=45%, list=2%, signal=45%	3914/3918/3691/3909/3655
REACTOME_HEDGEHOG_LIGAND_BIOGENESIS	65	0.565373	1.89943	0.00225225	0.0149503	0.00956095	5370	tags=66%, list=28%, signal=47%	3549/6469/5721/5696/5698/5720/7979/5699/5719/5686/10213/7316/5707/5684/5710/5706/5688/5702/5687/5685/5034/5713/5691/5704/5682/5690/5714/5692/5709/5715/5695/5693/10197/5708/5717/9491/5700/5701/5683/6400/6233/9861/23198
FERREIRA_EWINGS_SARCOMA_UNSTABLE_VS_STABLE_UP	158	0.490191	1.90077	0.00233645	0.0149503	0.00956095	3260	tags=44%, list=17%, signal=36%	54443/22974/55165/64423/7153/1063/9787/55355/51203/891/9833/890/11130/11004/990/64151/79682/1062/57082/29089/9768/9700/10403/81930/23397/9824/10721/1033/4001/56992/64105/837/1111/90355/54892/6804/9735/11169/63922/55706/29028/10036/3148/151246/83990/2237/6634/55010/6632/80119/5901/5427/6119/51602/7517/2177/51053/84057/55660/9918/908/26528/6627/7112/2079/9628/23658/10135/7818
PELLICCIOTTA_HDAC_IN_ANTIGEN_PRESENTATION_UP	61	0.574361	1.90166	0.0022779	0.0149503	0.00956095	4356	tags=57%, list=23%, signal=44%	10279/9601/23645/11014/5719/5686/55204/2923/10134/51280/1649/5707/79090/22820/54732/5710/51614/55829/51371/811/22818/5691/5704/567/10972/26958/1315/3309/5692/5709/51014/5715/5695/9276/5708
SHETH_LIVER_CANCER_VS_TXNIP_LOSS_PAM3	73	0.553973	1.90182	0.00226244	0.0149503	0.00956095	1422	tags=34%, list=8%, signal=32%	26499/8581/150696/7033/7103/6690/11065/4288/6590/3934/51330/3655/11226/5834/8842/891/999/389/23764/91860/780/90060/26227/6319/8824
NIKOLSKY_BREAST_CANCER_16P13_AMPLICON	117	0.513859	1.90238	0.00234742	0.0149503	0.00956095	3018	tags=41%, list=16%, signal=35%	10232/64063/124220/51330/64285/64714/9235/9088/124222/10942/90861/54442/401827/84231/6923/260429/65993/26063/8312/6650/4350/84264/84326/197335/10607/54985/63922/4913/84331/6187/9028/90850/83986/2671/51734/57799/9351/115939/10573/7755/9894/81889/79228/7329/4716/7760/79412/9091
MENSE_HYPOXIA_UP	95	0.530647	1.9024	0.00224215	0.0149503	0.00956095	3361	tags=40%, list=18%, signal=33%	3099/30001/133/444/8553/123036/2017/5033/23764/6676/8780/9314/5230/51129/51141/642273/283/23645/29923/6319/1051/5194/26355/7422/230/54985/55818/3638/8497/2297/55191/25911/79365/8974/2821/10144/10135/5163
RIZ_ERYTHROID_DIFFERENTIATION	79	0.549853	1.90546	0.0022779	0.0149503	0.00956095	3846	tags=42%, list=20%, signal=33%	7153/25833/3397/4605/24137/29128/4091/4173/1869/1058/9212/2146/4171/9156/3297/11335/10401/2000/8531/8928/3148/2237/4176/6772/5427/5424/2355/5861/5439/1032/641/6670/5862
REACTOME_SRP_DEPENDENT_COTRANSLATIONAL_PROTEIN_TARGETING_TO_MEMBRANE	112	0.52014	1.90652	0.00234192	0.0149503	0.00956095	6344	tags=71%, list=34%, signal=47%	6192/6132/116832/23480/6187/6184/6223/200916/51065/6227/6159/6158/6173/6229/6157/6141/6181/6188/6176/25873/6137/6175/6142/28972/23471/6217/6136/6170/6166/2197/6209/6185/11224/6746/6165/6747/9045/6726/29927/6156/6160/9789/3921/6152/6167/1650/6134/6235/6729/6230/6123/6222/51121/6168/23478/6193/6210/6155/6218/6231/6161/6207/6201/6224/6233/4736/60559/58477/6205/6129/6208/6146/6143/6171/6234/6147/2352…
REACTOME_GOLGI_CISTERNAE_PERICENTRIOLAR_STACK_REORGANIZATION	14	0.770468	1.90662	0.00417537	0.0210028	0.0134316	3846	tags=71%, list=20%, signal=57%	5347/983/9133/891/5595/8548/81876/26003/5861/5862
FUJII_YBX1_TARGETS_DN	188	0.482064	1.90807	0.00251889	0.0149503	0.00956095	2993	tags=44%, list=16%, signal=37%	22943/9536/7153/7083/2305/6241/259266/4605/1163/51203/9833/24137/11130/144455/990/55723/3832/79682/29128/701/4173/81620/57630/51514/55635/55789/995/23397/4171/83879/5888/1033/4085/55388/4001/9319/93099/9156/3556/64105/899/55215/1841/1111/79801/10733/51659/11270/54892/7035/10535/3070/56704/9538/11339/1017/29028/5984/10036/6941/55839/3069/7374/83990/2237/22948/6240/55247/2530/5522/4176/55010/5427/9…
REACTOME_MITOTIC_G2_G2_M_PHASES	199	0.478399	1.90883	0.00247525	0.0149503	0.00956095	4435	tags=45%, list=23%, signal=35%	22974/5347/1063/2305/983/4751/9133/4605/9088/891/84790/6790/890/84962/3161/7277/1869/995/22822/5721/5696/5698/54820/5720/51512/55722/7979/10733/653784/5699/10383/1022/3320/1017/5719/5686/286826/10213/4331/994/10133/7316/5707/5684/8636/5710/8655/440145/993/5706/203068/5688/79866/9793/5702/80321/5687/5685/1781/5713/7465/5691/5704/4218/5682/79861/80097/51400/984/7283/3326/1026/5690/10381/1454/5714/5…
BENPORATH_ES_1	376	0.447775	1.90894	0.00253165	0.0149503	0.00956095	3361	tags=41%, list=18%, signal=34%	6337/7138/29785/1382/114569/3159/3856/10644/10874/54845/112399/51599/5331/991/5097/983/1894/3710/1829/2064/6241/9787/2118/10643/4072/3038/11145/113130/10053/2041/8842/332/699/6535/891/9603/1525/890/24137/9232/11004/990/6566/3161/7855/5058/4257/79007/701/55366/4173/81620/5460/23170/10635/58516/9212/23397/83596/79071/100133941/4171/3329/55388/10637/5366/93099/548596/1741/23246/80179/7546/1111/7004/…
TAKAO_RESPONSE_TO_UVB_RADIATION_UP	82	0.546018	1.90957	0.00227273	0.0149503	0.00956095	4394	tags=55%, list=23%, signal=42%	6275/1999/7295/6192/10653/5355/578/6717/5366/7979/6303/9377/4697/1329/1337/6636/1345/6992/518/7873/7316/6415/8655/1349/9592/6173/1622/11140/5687/6157/5441/11332/6175/740/2495/1327/381/11007/1351/3181/2073/10284/51035/1936/6230
LEE_LIVER_CANCER_MYC_TGFA_UP	61	0.576781	1.90967	0.0022779	0.0149503	0.00956095	3372	tags=52%, list=18%, signal=43%	8581/7033/3856/4061/1999/302/6590/3934/1476/4907/10553/595/5493/8407/5327/54810/7429/5899/3489/5359/873/4255/3484/9545/84722/7037/6229/10797/71/4321/93974/6136
WONG_PROTEASOME_GENE_MODULE	49	0.591495	1.91043	0.00217391	0.0149503	0.00956095	4542	tags=61%, list=24%, signal=47%	11065/991/29089/5696/5720/5699/55236/5686/10213/997/5707/6478/5688/5702/7347/8878/5685/5691/5682/10713/5690/5714/7375/5692/5709/9097/10197/9100/54926/6477
MOREAUX_B_LYMPHOCYTE_MATURATION_BY_TACI_DN	75	0.553018	1.91073	0.00220264	0.0149503	0.00956095	5976	tags=65%, list=32%, signal=45%	983/6566/29127/2146/4171/25804/1111/7298/580/9616/6183/151246/6742/22948/55858/118487/81539/5901/10969/23310/7965/23658/11164/84233/84916/51234/10576/9343/195828/1736/5714/9158/114971/152100/92609/51121/1653/51463/22995/10146/128061/115416/5591/55871/84545/8697/120227/29087/8666
REACTOME_DEGRADATION_OF_GLI1_BY_THE_PROTEASOME	60	0.575524	1.91159	0.00226244	0.0149503	0.00956095	5370	tags=70%, list=28%, signal=50%	5721/5696/5698/5720/7979/5699/5719/5686/10213/7316/5707/5684/8650/5710/5706/5688/5702/5687/5685/5713/5691/5704/5682/5690/5714/5692/5709/5715/5695/5693/10197/5708/5717/83737/9491/5700/5701/9978/5683/6233/9861/23198
MALONEY_RESPONSE_TO_17AAG_DN	74	0.556396	1.91181	0.00225225	0.0149503	0.00956095	4109	tags=54%, list=22%, signal=42%	771/11065/5347/6241/3939/1212/5757/4085/7167/6923/6628/7114/6637/509/6635/6636/5686/805/54205/378/3182/521/9141/8655/5688/7520/100287932/6157/908/5441/10728/6741/5036/6217/8443/6166/11224/6156/3838/1211
REACTOME_REGULATION_OF_RUNX2_EXPRESSION_AND_ACTIVITY	73	0.5572	1.91289	0.00226244	0.0149503	0.00956095	5370	tags=71%, list=28%, signal=51%	4488/5721/57154/5696/5698/2101/5720/650/7979/5699/5719/5686/10213/7316/5707/5684/11059/5710/6772/5706/5688/5702/5687/5685/5713/5691/5704/5682/860/5690/7291/5714/5692/5709/5715/5695/5693/10197/5708/5717/9491/865/10273/2932/5700/5701/9978/5683/6233/9861/1749/23198
SERVITJA_LIVER_HNF1A_TARGETS_UP	132	0.507344	1.91385	0.00235294	0.0149503	0.00956095	1742	tags=34%, list=9%, signal=31%	8581/27111/1728/5468/54443/8714/11065/22974/302/6590/57016/991/54795/51330/53834/1894/4751/10643/9133/5834/10112/699/891/148170/55143/890/11004/3832/3613/3161/6783/1992/29127/23436/6574/9212/79071/4171/4258/4085/6319/122970/160335/57486/157570
JI_CARCINOGENESIS_BY_KRAS_AND_STK11_UP	12	0.812065	1.91408	0.00210526	0.0149503	0.00956095	1036	tags=67%, list=5%, signal=63%	1308/3853/53836/7020/101/5317/3852/27076
WEST_ADRENOCORTICAL_TUMOR_MARKERS_UP	22	0.710658	1.91464	0.0021978	0.0149503	0.00956095	1407	tags=59%, list=7%, signal=55%	7153/983/4751/6241/259266/6713/9235/10112/9055/51514/5046/5366/27338
ZWANG_CLASS_3_TRANSIENTLY_INDUCED_BY_EGF	216	0.475869	1.91473	0.00251889	0.0149503	0.00956095	2778	tags=38%, list=15%, signal=32%	6513/1969/1364/4070/3557/346389/1999/4008/51316/5653/133/79669/3673/1604/5329/7430/8870/9076/2150/8853/1755/5743/7050/221393/8553/91683/51809/10140/54101/84002/3280/23764/9414/6574/222584/3269/23268/157638/9314/23645/3556/6364/65124/23012/51274/677/80149/79660/166929/182/22904/57552/602/4664/8548/330/81671/57162/23286/338376/23677/5912/10512/196527/143872/7082/10221/7975/4791/284207/3169/83855/86…
KEGG_DNA_REPLICATION	36	0.633875	1.9176	0.00225225	0.0149503	0.00956095	5054	tags=75%, list=27%, signal=55%	57804/4173/4171/10535/5111/5984/6742/2237/4176/5427/6119/56655/5558/5425/5426/5424/246243/5982/10714/5985/4175/23649/1763/3978/4174/4172/54107
SMID_BREAST_CANCER_RELAPSE_IN_BONE_DN	297	0.457529	1.91792	0.00239808	0.0149503	0.00956095	1460	tags=25%, list=8%, signal=23%	10232/3868/23650/3853/5655/768/3783/2707/3872/688/6273/22943/94025/55612/5650/362/7850/10158/10644/10874/11254/4071/6590/9123/5653/4316/7851/3655/64065/29842/10643/8645/5834/6662/9076/27242/9235/634/51442/5266/9982/5743/2568/5317/3241/7534/3861/6624/6566/3613/4323/8407/1824/3852/8780/1356/1535/5792/2023/3887/3329/8942/51312/27293/8190/26227/3854/6364/79623/8543/1956/2049/6374
KEGG_SPLICEOSOME	126	0.513936	1.91929	0.0023753	0.0149503	0.00956095	6199	tags=63%, list=33%, signal=43%	3303/3304/3310/25804/51639/6628/6637/6626/6635/6636/10262/10465/22827/6634/6632/6633/6631/9939/55660/6627/8175/51503/84321/23658/8683/5093/56259/10713/3183/4116/1665/9092/9343/55110/10915/3306/151903/25949/153527/10992/8896/10285/84844/6429/57819/51690/22938/51691/23451/6629/3178/220988/23350/3192/27258/27339/22916/9416/6428/11338/24148/26121/6432/3190/8559/10450/10189/9775/9785/1659/23450/10084/…
LAMB_CCND1_TARGETS	19	0.726833	1.91956	0.00210084	0.0149503	0.00956095	2122	tags=47%, list=11%, signal=42%	3303/3304/1942/4088/6195/8312/3959/3835/10808
HONRADO_BREAST_CANCER_BRCA1_VS_BRCA2	18	0.731014	1.91986	0.00207469	0.0149503	0.00956095	1792	tags=61%, list=9%, signal=55%	3429/3856/4288/7153/2069/332/891/595/890/1956/898
LIN_APC_TARGETS	70	0.567201	1.92203	0.00228311	0.0149503	0.00956095	3488	tags=49%, list=18%, signal=40%	3855/11187/4061/10205/375790/440603/2705/10755/595/6510/81/4323/823/3852/3336/3068/10195/116832/4000/7052/10362/5111/4363/347734/10134/6274/9894/8519/51608/81876/4296/131601/10217/11333
JOHANSSON_GLIOMAGENESIS_BY_PDGFB_UP	53	0.591507	1.92242	0.00221729	0.0149503	0.00956095	3011	tags=55%, list=16%, signal=46%	4288/991/5347/7153/983/6241/26472/928/595/6696/8407/55872/65108/4171/1841/7171/2335/5111/3148/55959/54991/100128731/51065/1316/1622/83786/7168/3956/9918
HUANG_FOXA2_TARGETS_DN	38	0.629725	1.92368	0.00228311	0.0149503	0.00956095	2387	tags=53%, list=13%, signal=46%	3691/8796/9022/1001/6275/11226/5329/55240/634/7045/6696/5327/4091/4017/1082/3887/7052/412/3489/960
MATTHEWS_SKIN_CARCINOGENESIS_VIA_JUN	16	0.751545	1.92437	0.00207469	0.0149503	0.00956095	1724	tags=50%, list=9%, signal=45%	3909/30001/5329/6696/5916/8824/8717/79026
REACTOME_CELLULAR_RESPONSE_TO_HYPOXIA	75	0.557349	1.9257	0.00220264	0.0149503	0.00956095	5470	tags=65%, list=29%, signal=47%	768/112399/84962/5721/5696/5698/5720/7979/6923/7422/5699/5719/25994/5686/10213/7316/5707/5684/5710/5706/5688/6921/5702/5687/5685/5713/5691/5704/5682/5690/5714/5692/5709/5715/5695/5693/10197/5708/5717/9491/5700/5701/9978/5683/6233/7322/9861/23198/7323
WINTER_HYPOXIA_METAGENE	235	0.471042	1.92584	0.0025	0.0149503	0.00956095	3132	tags=41%, list=17%, signal=35%	3880/768/4582/6513/4233/771/3429/7033/3099/3875/1999/302/4316/133/7039/638/3664/983/3939/5329/2152/1942/5768/4907/25825/5328/6535/7045/5743/6696/226/54541/8553/3861/7295/6566/598/2597/5033/3486/2288/8780/6574/1356/136/5230/5315/51129/2023/4860/301/3329/7167/29923/3098/7162/4282/4322/7422/7052/6303/5970/9136/230/3065/2335/1907/10606/901/10808/10534/4791/5236/1289/10440/1649/3484/394/1950/5684/3638…
YAMASHITA_LIVER_CANCER_WITH_EPCAM_UP	52	0.595861	1.92601	0.00224719	0.0149503	0.00956095	3840	tags=50%, list=20%, signal=40%	22943/1829/10205/4072/6192/4192/7504/7272/7429/6732/5782/79101/191/11222/171586/6159/6158/9804/1371/6711/6229/6188/6175/8443/11224/6160
JEON_SMAD6_TARGETS_DN	18	0.734867	1.92998	0.00207469	0.0149503	0.00956095	1692	tags=56%, list=9%, signal=51%	2065/7153/9133/999/3832/1717/1058/1956/27338/10083
HAHTOLA_MYCOSIS_FUNGOIDES_SKIN_DN	26	0.693508	1.93422	0.00221729	0.0149503	0.00956095	2138	tags=46%, list=11%, signal=41%	5655/5650/1893/7153/3655/307/11130/1824/5584/2683/3959/8743
REACTOME_TIGHT_JUNCTION_INTERACTIONS	29	0.674385	1.93449	0.00222222	0.0149503	0.00956095	2479	tags=48%, list=13%, signal=42%	51208/1364/1366/84612/50848/9076/137075/92359/5584/9069/10207/56288/64398/9071
REACTOME_CHROMOSOME_MAINTENANCE	62	0.580807	1.93451	0.00225225	0.0149503	0.00956095	4672	tags=58%, list=25%, signal=44%	55355/57804/79682/57082/1058/64105/79019/5111/10856/11339/2491/5984/387103/55839/8607/2237/201254/5427/6119/54069/56655/5558/5425/4869/5426/5424/5982/64946/10714/55651/1736/5985/23649/1763/3978/91687
REACTOME_G1_S_DNA_DAMAGE_CHECKPOINTS	68	0.573199	1.93459	0.00228833	0.0149503	0.00956095	5370	tags=72%, list=28%, signal=52%	890/5721/5696/5698/5720/7979/1111/5699/898/1017/5719/5686/10213/7316/5707/5684/64326/5710/993/5706/5688/5702/5687/5685/1029/5713/5691/5704/5682/57060/1026/5690/5714/11200/5692/5709/5715/5695/5693/10197/5708/5717/9491/5700/5701/5683/6233/9861/23198
REACTOME_MITOTIC_PROMETAPHASE	198	0.484736	1.93557	0.00247525	0.0149503	0.00956095	3864	tags=37%, list=20%, signal=30%	991/5347/1063/983/4751/9133/113130/332/699/891/84790/55143/11130/11004/64151/79682/1062/57082/701/7277/83540/147841/1058/9212/10403/81930/23397/4085/54820/64105/55722/79019/151648/55920/10733/3619/653784/9735/10383/220134/54821/3320/10051/2491/151246/79023/55839/55055/8379/8636/8655/440145/203068/9793/80321/1457/5905/9918/1781/9184/9183/79861/1460/57122/10726/80097/64946/7283/79980/10381/1454/549…
REACTOME_DEGRADATION_OF_AXIN	55	0.592682	1.93652	0.00224719	0.0149503	0.00956095	5370	tags=73%, list=28%, signal=52%	5721/5696/5698/5720/7979/5699/8312/5719/5686/10213/7316/5707/5684/5710/5706/5688/5702/5687/5685/5713/5691/5704/5682/5690/5714/5692/5709/5715/5695/5693/10197/5708/5717/9491/5700/5701/5683/6233/9861/23198
HU_GENOTOXIN_ACTION_DIRECT_VS_INDIRECT_24HR	47	0.607365	1.93996	0.00220751	0.0149503	0.00956095	5188	tags=60%, list=27%, signal=43%	90993/7153/55974/5757/3851/65124/11313/3619/10539/509/2014/4691/6801/7203/10953/7936/92140/328/3726/23149/221092/51668/7324/10922/60626/64342/5683/5931
MEISSNER_BRAIN_HCP_WITH_H3K27ME3	262	0.471917	1.94014	0.00251889	0.0149503	0.00956095	2461	tags=25%, list=13%, signal=22%	3855/3880/2300/5307/150696/10331/390874/362/375616/3875/23624/81693/83715/5017/92421/3664/64866/79887/25833/2626/1366/10643/4072/255738/6493/794/6692/7477/9620/59352/5317/4909/3219/113452/3209/161291/92359/3217/3216/55200/127343/65108/54626/3227/6928/7127/162417/3206/126695/7022/134285/3215/147699/602/2306/3207/1591/126969/6495/4861/85474/1045/7780/1592/7161/3221
SCHMIDT_POR_TARGETS_IN_LIMB_BUD_UP	26	0.696105	1.94146	0.00221729	0.0149503	0.00956095	3692	tags=73%, list=20%, signal=59%	3949/6713/6307/2222/1717/3157/79071/4597/2224/50814/1592/2296/1595/3638/7108/4598/2267/39/6309
RICKMAN_HEAD_AND_NECK_CANCER_C	105	0.535337	1.9415	0.00230415	0.0149503	0.00956095	1266	tags=27%, list=7%, signal=25%	84985/5655/6513/22943/5650/8091/978/79148/80117/11254/5653/3294/794/2069/79413/5743/221393/8710/1824/374918/4257/2863/79589/54544/23767/54852/5099/6318
REACTOME_ACTIVATION_OF_THE_PRE_REPLICATIVE_COMPLEX	33	0.649093	1.94296	0.00217865	0.0149503	0.00956095	5054	tags=76%, list=27%, signal=56%	990/4173/81620/8318/4171/23594/55388/1017/4176/5427/4999/6119/56655/5558/51053/4998/5426/4175/84515/23649/10926/5000/4174/4172/54107
ZHANG_RESPONSE_TO_CANTHARIDIN_DN	66	0.575214	1.94347	0.00222717	0.0149503	0.00956095	4367	tags=61%, list=23%, signal=47%	6241/389/9748/24139/7086/5437/4522/10056/6626/10856/10534/518/11001/7388/11222/10131/6240/8662/6159/4176/6632/100287932/6631/10245/5425/6627/5036/51491/3183/1327/7283/5211/5985/517/4722/3921/23438/1503/5223/1936
HINATA_NFKB_TARGETS_KERATINOCYTE_DN	23	0.715482	1.94493	0.00219298	0.0149503	0.00956095	1256	tags=52%, list=7%, signal=49%	9052/1830/4680/8796/5650/5653/7739/6820/7348/5493/1846/3373
PUJANA_BRCA_CENTERED_NETWORK	117	0.525518	1.94555	0.00234742	0.0149503	0.00956095	3197	tags=38%, list=17%, signal=32%	11065/991/7153/983/4605/3833/6790/890/3161/4173/9700/10635/10403/9837/2146/4171/4085/4001/8438/55215/6628/6626/5111/10051/10606/5984/10036/3148/23173/7150/5932/7374/6240/8667/26574/1457/22934/6929/4690/9918/6627/9184/7112/4436/5426
WONG_ENDMETRIUM_CANCER_UP	25	0.704419	1.94563	0.00221239	0.0149503	0.00956095	2487	tags=72%, list=13%, signal=63%	5307/6273/7033/284340/3934/7020/83715/83481/251/7429/684/6364/6374/163782/12/27121/3169/2296
NATSUME_RESPONSE_TO_INTERFERON_BETA_DN	51	0.601241	1.9464	0.00220751	0.0149503	0.00956095	3709	tags=55%, list=20%, signal=44%	6273/302/2950/9168/7295/823/2597/1869/9540/4709/5597/7421/1337/1345/3489/6187/5052/9446/81892/7520/3956/573/6176/9588/6464/2495/1327/3267
CREIGHTON_AKT1_SIGNALING_VIA_MTOR_DN	23	0.716116	1.94666	0.00219298	0.0149503	0.00956095	3883	tags=65%, list=21%, signal=52%	10103/3856/51330/226/10519/1717/5531/5050/4282/10383/527/2821/7529/5211/5476
PUJANA_BREAST_CANCER_WITH_BRCA1_MUTATED_UP	57	0.594935	1.94672	0.00226244	0.0149503	0.00956095	3809	tags=46%, list=20%, signal=37%	991/2305/983/4605/6790/3161/4173/1058/10635/9212/10403/2146/4171/8438/27338/6626/10051/5984/22934/4690/9918/4436/10915/8458/641/10212
PODAR_RESPONSE_TO_ADAPHOSTIN_DN	18	0.741395	1.94713	0.00207469	0.0149503	0.00956095	2977	tags=72%, list=16%, signal=61%	55765/3099/6382/6307/2222/1717/6319/899/898/7374/3638/7037/71
SEIDEN_ONCOGENESIS_BY_MET	89	0.549611	1.94758	0.00229358	0.0149503	0.00956095	3679	tags=44%, list=19%, signal=35%	7103/306/983/3655/8754/2150/2069/6307/307/5033/2059/8780/114908/6374/79101/29957/4179/10434/3320/5358/25994/6240/829/51765/27230/8519/6772/10787/8813/27249/908/10096/4869/10527/23471/6342/10558/253782/10915
YAO_TEMPORAL_RESPONSE_TO_PROGESTERONE_CLUSTER_13	167	0.500502	1.94766	0.00240964	0.0149503	0.00956095	5234	tags=57%, list=28%, signal=42%	6277/6281/302/595/10682/8407/1978/1535/122704/7086/301/5721/2987/10447/6150/80777/11161/5050/6923/84817/54108/27243/4664/140823/28998/1329/1337/23480/388753/4363/5686/5971/6941/23423/347734/65003/10465/84833/9141/10573/8636/4738/1349/3460/1622/9793/5687/11321/3956/514/7385/29968/7818/84299/55168/79042/51728/4720/83658/26521/4704/389362/2109/1891/10542/11054/51241/3191/10994/4717/9556/9158/5935/88…
XU_HGF_SIGNALING_NOT_VIA_AKT1_6HR	25	0.705523	1.94868	0.00221239	0.0149503	0.00956095	2450	tags=60%, list=13%, signal=52%	7262/64063/51599/5329/8853/5328/3241/8795/23268/51129/6303/10938/5829/960/7378
WANG_BARRETTS_ESOPHAGUS_AND_ESOPHAGUS_CANCER_DN	36	0.644223	1.94891	0.00225225	0.0149503	0.00956095	2605	tags=56%, list=14%, signal=48%	23650/3853/6273/1382/978/1893/6317/653145/6820/1476/5493/5916/3851/301/80740/5083/57152/6484/1475/7165
REACTOME_RHO_GTPASES_ACTIVATE_FORMINS	139	0.515136	1.95041	0.00239808	0.0149503	0.00956095	3906	tags=46%, list=21%, signal=37%	29984/991/5347/1063/332/699/84790/55143/11130/11004/6714/1855/79682/389/1062/57082/701/7277/83540/81624/147841/1058/9212/10403/81930/5879/1729/4085/54820/64105/79019/151648/55920/60/3619/9735/10383/220134/54821/2491/151246/79023/55839/1730/55055/8379/8655/9793/5905/71/1781/3688/9184/9183/79861/387/57122/10726/64946/79980/10381/54908/5525/998
ZWANG_EGF_INTERVAL_DN	200	0.489011	1.95115	0.00248139	0.0149503	0.00956095	2205	tags=28%, list=12%, signal=25%	8000/5655/113146/2707/90019/22943/55765/79148/80117/57111/29984/4061/1999/6590/652/116154/2886/29842/1366/84612/144100/79144/5328/25841/5920/26298/163732/8412/54101/3280/58495/6659/29108/128218/11221/55561/51274/116238/2013/1051/148022/7022/760/80149/10765/83463/28987/6242/149466/80346/54985/50862/121512/3993/8743/374395/5580
SEMENZA_HIF1_TARGETS	36	0.645395	1.95246	0.00225225	0.0149503	0.00956095	1730	tags=44%, list=9%, signal=40%	768/6513/3099/133/3939/226/2597/3486/1356/5230/5315/2023/7167/3098/7422/230
KEGG_CELL_CYCLE	124	0.522583	1.95277	0.00232558	0.0149503	0.00956095	4223	tags=42%, list=22%, signal=33%	2810/991/5347/983/9133/699/9088/891/595/890/7534/9232/990/4088/701/4173/1869/7272/9700/8318/995/1021/4171/4085/23594/1111/3065/898/1022/5111/1017/994/8379/4176/993/4999/1029/7042/9184/4998/7529/7465/1032/1026/1030/1870/11200/5885/4175/51343/51529/7532
REACTOME_NONSENSE_MEDIATED_DECAY_NMD	115	0.529695	1.95322	0.00229885	0.0149503	0.00956095	6661	tags=75%, list=35%, signal=49%	6192/26986/6132/116832/6187/6223/200916/51065/6227/6159/1981/6158/9887/6173/6229/2935/9939/6157/6141/6181/6188/6176/10921/25873/6137/6175/6142/6217/23381/6136/6170/6166/2197/4116/6209/55110/11224/6165/9045/6156/6160/56006/5520/3921/6152/6167/6134/6235/5518/6230/6123/6222/51121/5976/6168/22916/6193/6210/6155/23049/6218/6231/6161/6207/6201/6224/6233/4736/9775/6205/6129/6208/5515/6146/6143/6171/6234…
REACTOME_STABILIZATION_OF_P53	57	0.596963	1.95336	0.00226244	0.0149503	0.00956095	5370	tags=74%, list=28%, signal=53%	5721/5696/5698/5720/7979/5699/5719/5686/10213/7316/5707/5684/64326/5710/5706/5688/5702/5687/5685/1029/5713/5691/5704/5682/5690/5714/11200/5692/5709/5715/5695/5693/10197/5708/5717/9491/5700/5701/5683/6233/9861/23198
REACTOME_DNA_STRAND_ELONGATION	32	0.660398	1.95419	0.00221239	0.0149503	0.00956095	5027	tags=78%, list=27%, signal=57%	57804/4173/9837/8318/4171/51659/5111/5984/2237/4176/6119/5558/5425/5424/5982/10714/5985/4175/84515/23649/1763/3978/84296/4174/4172
AMIT_SERUM_RESPONSE_120_MCF10A	65	0.581868	1.95485	0.00225225	0.0149503	0.00956095	2675	tags=38%, list=14%, signal=33%	688/79669/80004/1604/5329/7430/3397/6662/8412/23764/5205/9314/23529/11221/30850/65124/650/23353/3976/5912/29946/6737/55686/1478/390
DAZARD_UV_RESPONSE_CLUSTER_G1	59	0.592267	1.95594	0.00225734	0.0149503	0.00956095	5084	tags=61%, list=27%, signal=45%	302/7083/1301/1474/3158/7295/9961/5230/5315/4939/2987/6635/6778/23480/521/6227/8655/6173/6711/55558/10063/5902/10614/3326/6156/6160/10611/4717/4694/6167/1350/9831/6168/22916/4637/6218
REACTOME_PHOSPHORYLATION_OF_THE_APC_C	19	0.740659	1.95608	0.00210084	0.0149503	0.00956095	598	tags=21%, list=3%, signal=20%	11065/5347/983/891
CHIANG_LIVER_CANCER_SUBCLASS_UNANNOTATED_DN	190	0.492569	1.95776	0.00247525	0.0149503	0.00956095	5531	tags=61%, list=29%, signal=44%	6281/22974/983/1894/9133/226/3613/29089/55872/5230/10635/6856/10413/1033/4085/471/4069/51639/7298/84650/23585/26996/7105/10535/4179/10477/5111/1603/126969/4697/28998/476/10552/51719/50862/5984/6183/5686/10963/79023/7873/1207/2237/51142/6632/55732/5901/25911/8813/5427/1622/6633/5702/6119/7520/3703/10130/51053/292/4436/28985/6217/387/65080/51375/64946/51234/10067/10576/3326/55907/10542/10575/51002/…
BOWIE_RESPONSE_TO_EXTRACELLULAR_MATRIX	16	0.76551	1.96013	0.00207469	0.0149503	0.00956095	3327	tags=81%, list=18%, signal=67%	9636/5696/5698/2537/3665/3430/4599/3437/5699/8519/6772/3659/3433
LI_WILMS_TUMOR_ANAPLASTIC_UP	17	0.755149	1.96243	0.00208768	0.0149503	0.00956095	2123	tags=59%, list=11%, signal=52%	4288/1063/51203/11004/7272/1058/23397/83461/8438/5984
PEDERSEN_METASTASIS_BY_ERBB2_ISOFORM_1	46	0.622435	1.96903	0.00224215	0.0149503	0.00956095	1488	tags=48%, list=8%, signal=44%	26499/388743/1969/23657/57214/7851/3673/10205/57211/27242/2069/8061/374/8553/4084/1846/23764/22822/3887/127845/1848/53630
MOSERLE_IFNA_RESPONSE	30	0.682355	1.96961	0.00224719	0.0149503	0.00956095	2795	tags=57%, list=15%, signal=48%	8638/54809/55601/64108/91351/4939/4599/3437/219285/10561/64135/8743/94240/10964/8519/6772/129607
WANG_RESPONSE_TO_GSK3_INHIBITOR_SB216763_DN	346	0.465047	1.97192	0.00251256	0.0149503	0.00956095	3961	tags=48%, list=21%, signal=39%	3783/6513/92745/28231/4061/3949/30001/7083/3303/6241/3304/2118/1718/7430/4605/6713/1163/127281/6307/699/9088/9833/977/5214/10682/890/9232/11130/144455/990/6566/55723/64151/95/1717/79682/29128/57082/29089/2288/701/7277/55872/3336/4173/84706/1978/3157/83540/81624/147841/51514/90861/10635/58516/23231/9837/8318/3693/4171/283991/22822/5888/4085/23594/55388/9319/90381/9156/6319/3556/64105/8438/86/79733…
FARMER_BREAST_CANCER_APOCRINE_VS_BASAL	324	0.467988	1.97351	0.00249377	0.0149503	0.00956095	3338	tags=40%, list=18%, signal=34%	3868/3855/3853/5753/6337/688/6273/6277/6275/79083/3875/25803/11065/10644/2582/4288/54979/55165/991/5002/7153/7113/7264/1718/83451/5029/8821/56938/27242/5768/8842/10112/6307/6934/205/999/9833/2568/5317/146909/79170/645/3158/9928/6566/2222/3832/51809/4488/5033/1846/81031/222/563/3310/55503/334/23170/23443/23231/9837/1573/54884/6284/8942/11221/5366/3417/3854/6319/6491/8543/54502/5445/10099/9517/4400…
TIEN_INTESTINE_PROBIOTICS_2HR_UP	30	0.684045	1.97449	0.00224719	0.0149503	0.00956095	4188	tags=60%, list=22%, signal=47%	688/771/54575/2050/2597/5230/23231/4041/9208/10945/7316/23196/5747/6175/567/8125/8073/1984
NAGASHIMA_NRG1_SIGNALING_UP	169	0.508133	1.97717	0.00242718	0.0149503	0.00956095	2480	tags=37%, list=13%, signal=32%	2810/3918/1969/7262/3909/1364/6699/28231/3949/133/112399/79669/7869/51330/7286/83481/5329/7430/3397/8870/2274/27242/2150/8061/374/9518/8553/1846/3280/23764/8795/27076/23767/3337/8915/23529/26136/8428/51278/60370/11221/23645/5366/29923/65124/80271/1051/2526/7422/3628/7414/7791/3976/1591/3669/29946/10221/7150/5606/1649/1316/4982
KEGG_RIBOSOME	86	0.567157	1.97929	0.00234742	0.0149503	0.00956095	5369	tags=63%, list=28%, signal=45%	6192/6132/28998/6187/6223/200916/51065/6227/6159/6158/6173/6229/6157/6141/6181/6188/6176/25873/6137/6175/6142/6217/6136/6170/6166/2197/6209/11224/6165/9045/6156/6160/3921/6152/6167/6134/6235/6230/6123/6222/51121/6168/51187/6193/6210/6155/6218/6231/6161/6207/6201/6224/6233/4736
REACTOME_POLO_LIKE_KINASE_MEDIATED_EVENTS	16	0.773134	1.97965	0.00207469	0.0149503	0.00956095	1102	tags=50%, list=6%, signal=47%	5347/1063/2305/9133/4605/9088/891/995
KIM_HYPOXIA	19	0.750084	1.98097	0.00210084	0.0149503	0.00956095	2750	tags=63%, list=15%, signal=54%	6513/3939/2152/5214/226/3486/51129/7167/7422/230/571/2997
BECKER_TAMOXIFEN_RESISTANCE_UP	54	0.608543	1.98344	0.00224215	0.0149503	0.00956095	2160	tags=41%, list=11%, signal=36%	7031/5753/5307/3429/7033/8537/7103/3397/1525/9636/1869/784/684/283/9111/2537/10099/4599/10561/10410/3959/2961
FOURNIER_ACINAR_DEVELOPMENT_LATE_DN	22	0.73633	1.9838	0.0021978	0.0149503	0.00956095	1839	tags=64%, list=10%, signal=58%	1969/55165/2305/6241/259266/1164/9982/6790/64151/1846/1033/9319/60/65981
CHIARADONNA_NEOPLASTIC_TRANSFORMATION_KRAS_CDC25_UP	55	0.608177	1.98714	0.00224719	0.0149503	0.00956095	3368	tags=56%, list=18%, signal=46%	3783/822/706/25791/3655/1192/8482/7045/928/595/374/6696/57804/5355/9768/26136/5888/7114/51123/55353/2817/4254/79017/7378/2530/8636/26471/1965/11332/79095/5154
WONG_MITOCHONDRIA_GENE_MODULE	216	0.494307	1.98892	0.00251889	0.0149503	0.00956095	5346	tags=57%, list=28%, signal=41%	1728/9123/706/9121/3158/6549/1356/481/1159/23246/2820/7417/25824/4709/9377/525/51629/10651/4697/28998/509/1537/1632/1329/1340/9551/1337/1345/23480/518/4715/7374/4710/11222/65003/521/5106/79751/3418/1429/10452/54704/1892/27089/55967/9446/2746/1349/4725/4716/100287932/10797/10105/80263/10245/10063/514/7284/4706/6576/79814/4729/7818/55168/740/6342/10128/4728/4720/51021/26521/1327/4704/51382/204/6182…
ELVIDGE_HYPOXIA_UP	169	0.5118	1.99144	0.00242718	0.0149503	0.00956095	2057	tags=33%, list=11%, signal=29%	9052/3855/768/113146/6513/6273/4233/6277/3099/6275/28231/2317/1999/53836/51316/30001/133/112399/1944/57214/5329/6662/3866/444/5768/205/7045/5214/9518/54541/8553/79644/1824/5033/3486/23764/6676/4017/81855/136/5230/51129/780/51141/283/29923/1956/26355/7422/6303/230/3669/10616/54985/901
CROMER_TUMORIGENESIS_DN	49	0.617237	1.99357	0.00217391	0.0149503	0.00956095	967	tags=41%, list=5%, signal=39%	1048/6286/8000/4680/4582/8796/4585/7033/3557/1893/3860/218/7739/57228/11005/3866/634/5493/2762/3851
COULOUARN_TEMPORAL_TGFB1_SIGNATURE_UP	110	0.548999	1.99417	0.00235294	0.0149503	0.00956095	2322	tags=35%, list=12%, signal=31%	1364/6707/114569/94234/4008/92421/3655/2886/10276/79370/6713/8870/6662/55785/56937/6535/7050/54541/8553/5327/1846/26010/6574/54544/6659/9260/780/51512/55760/54502/51474/7114/11235/602/4664/3145/8826/57222/5891
ONDER_CDH1_TARGETS_1_DN	167	0.512523	1.99443	0.00240964	0.0149503	0.00956095	2655	tags=30%, list=14%, signal=26%	9052/5655/4680/8796/22943/11012/5650/7850/55107/3856/3860/3934/7039/79098/55040/5029/6662/3866/51442/5266/8061/5743/26298/990/6566/1992/1824/3486/55930/4173/3157/54544/55388/1848/6672/841/1138/182/131566/51700/8507/5744/10808/6674/83990/2237/8626/1981/23212/3576
REACTOME_RESPIRATORY_ELECTRON_TRANSPORT	89	0.562963	1.99489	0.00229358	0.0149503	0.00956095	6087	tags=71%, list=32%, signal=48%	4709/9377/4697/1537/1329/1340/1337/1345/2108/4715/7388/54205/4710/10131/7384/27089/55967/1349/80219/4725/4716/4706/7385/4729/10128/4728/4720/1327/4704/2109/6391/6389/6392/51241/4717/1351/4694/4722/51300/4705/4723/4713/4726/6390/28976/1350/9167/29796/54539/116228/4695/4719/4711/4700/80224/25915/55863/6834/4696/4707/7381/4712/4724
MORI_PRE_BI_LYMPHOCYTE_UP	76	0.577139	1.99536	0.00221729	0.0149503	0.00956095	2767	tags=55%, list=15%, signal=47%	11065/4288/991/7153/983/2886/6241/55355/9133/6713/113130/1163/9055/9833/6790/24137/7295/81/29127/7272/51514/10403/23397/4171/83879/5888/4258/83461/4001/26227/79733/4282/10383/10051/133418/3182/23640/6240/4176/10267/203068/1622
REACTOME_THE_ROLE_OF_GTSE1_IN_G2_M_PROGRESSION_AFTER_G2_CHECKPOINT	78	0.576796	1.99766	0.00225225	0.0149503	0.00956095	5416	tags=69%, list=29%, signal=50%	5347/983/9133/891/84790/7277/5721/5696/5698/5720/51512/7979/5699/10383/3320/5719/5686/10213/7316/5707/5684/5710/5706/5688/5702/5687/5685/5713/5691/5704/5682/79861/3326/1026/5690/10381/5714/5692/5709/5715/5695/5693/10197/5708/5717/9491/5700/5701/5683/6233/63943/9861/23198/10376
TOOKER_GEMCITABINE_RESISTANCE_DN	120	0.539669	2.00403	0.00235294	0.0149503	0.00956095	3490	tags=48%, list=18%, signal=40%	9052/306/79083/254531/23657/1604/7430/6662/1474/3241/27347/3315/2288/4091/6574/1978/334/6697/10226/6319/80777/27338/1051/4522/7764/2872/51022/6611/5291/57761/1591/10559/23677/871/56034/2181/51582/3489/27101/7150/8540/3927/10598/7037/8974/26354/1054/3956/10130/4076/10063/29968/6472/8140/9015/28972/8443/23516
YAO_TEMPORAL_RESPONSE_TO_PROGESTERONE_CLUSTER_10	69	0.591326	2.00617	0.00226757	0.0149503	0.00956095	4680	tags=58%, list=25%, signal=44%	1366/3939/2288/3336/10263/5898/7417/5194/56889/7341/6238/5111/1603/27101/5052/27230/10959/8655/6749/100287932/5905/5685/10063/5441/29956/6741/132/6185/29101/29927/58505/8721/2653/372/5828/79145/10236/10574/54888/220988
HUMMERICH_SKIN_CANCER_PROGRESSION_UP	82	0.573699	2.00637	0.00227273	0.0149503	0.00956095	1601	tags=30%, list=8%, signal=28%	3868/3880/3691/4070/6277/1382/3557/3934/51330/64065/4072/101/4323/1992/389/1535/5230/8915/2023/9610/29108/899/4282/841/4322
REACTOME_TERMINATION_OF_O_GLYCAN_BIOSYNTHESIS	23	0.738444	2.00735	0.00219298	0.0149503	0.00956095	2246	tags=57%, list=12%, signal=50%	4586/4582/140453/4585/94025/200958/727897/4584/394263/56667/6482/10071/6484
HARRIS_HYPOXIA	81	0.576837	2.0086	0.00229885	0.0149503	0.00956095	2891	tags=49%, list=15%, signal=42%	768/6513/771/7033/3099/133/7039/638/3939/5329/2152/5743/5214/6696/226/8553/7295/2597/5033/3486/1356/5230/5315/2023/3098/4282/4322/7422/7052/6303/1907/901/1289/1649/3484/3576/7804/7037/6101/7520
DAZARD_UV_RESPONSE_CLUSTER_G24	21	0.749755	2.00864	0.00213675	0.0149503	0.00956095	834	tags=38%, list=4%, signal=36%	1364/3429/5646/1893/4071/6820/5266/3606
CHEN_LUNG_CANCER_SURVIVAL	29	0.701078	2.01106	0.00222222	0.0149503	0.00956095	1600	tags=38%, list=8%, signal=35%	3855/3880/3856/653145/2950/5331/5230/5315/2023/301/60
ZHONG_SECRETOME_OF_LUNG_CANCER_AND_FIBROBLAST	123	0.538991	2.01157	0.00231481	0.0149503	0.00956095	3792	tags=53%, list=20%, signal=43%	10232/5646/3960/1893/6385/822/64129/2950/3939/375790/5768/307/928/999/6696/7534/1015/81/9748/1356/5230/5315/2023/4860/7167/10447/629/440387/4000/60/7414/2335/5269/3959/124583/10512/10036/5686/5480/5052/5684/22883/4191/9446/3251/83707/5688/23549/811/5685/2821/87/197/5034/7529/9588/5691/5682/387/1509/3326/1277/9948/5690/6418
HONMA_DOCETAXEL_RESISTANCE	35	0.668346	2.015	0.00226757	0.0149503	0.00956095	4582	tags=71%, list=24%, signal=54%	6281/2950/26472/2597/1072/2023/353/2537/58472/4599/64968/201562/63875/9141/56005/8655/203068/811/514/6185/3309/1499/4722/1350/8087
BLUM_RESPONSE_TO_SALIRASIB_DN	335	0.477221	2.01576	0.00253807	0.0149503	0.00956095	4129	tags=48%, list=22%, signal=38%	1382/11065/22974/4288/6382/991/5347/7153/1063/7083/51155/983/4751/6241/3939/1718/9133/3397/4605/6493/6662/1164/10024/10112/699/51203/9055/10682/6790/890/24137/7348/9232/11130/11004/990/3832/64151/3161/3315/54101/701/55872/1869/7272/1058/2175/6659/5315/9700/10635/9212/10403/2023/1468/8318/995/2146/9401/10615/4171/5888/1033/4085/23594/7167/56992/9319/9156/6150/6491/899/1841/4000/5050/11335/1111/933…
PID_ECADHERIN_STABILIZATION_PATHWAY	41	0.655842	2.01627	0.00229358	0.0149503	0.00956095	3098	tags=63%, list=16%, signal=53%	1969/4233/362/7408/1942/144100/999/1500/1495/1729/57662/1956/382/5819/51474/4248/7414/7791/1950/6810/10787/10006/60412/4690/87/4646
BILD_MYC_ONCOGENIC_SIGNATURE	197	0.506535	2.01648	0.00249377	0.0149503	0.00956095	3331	tags=39%, list=18%, signal=33%	9052/54869/3918/4486/8714/57530/259173/266977/5339/2065/3303/10903/64285/54961/56938/55785/101/5328/27346/9982/79413/6535/55143/3177/4909/1992/3310/23170/84798/6652/7127/3329/57707/10195/57154/471/26030/23246/115817/9266/7052/55902/23564/1606/9136/79026/148523/81671/10056/6573/56915/5373/10606/1017/901/84331/4791/1289/53905/54704/861/5245/4691/80308/27042/23351/637/26354/54663/7965/8886/4869/1002…
REACTOME_CYCLIN_A:CDK2_ASSOCIATED_EVENTS_AT_S_PHASE_ENTRY	85	0.58079	2.02004	0.00234192	0.0149503	0.00956095	4435	tags=58%, list=23%, signal=44%	5753/1163/595/890/1869/5721/5696/5698/5720/7979/5699/898/1022/1017/5719/91768/5686/286826/10213/4331/994/7316/5707/5684/5710/993/5706/5688/5702/5687/5685/5713/7465/5691/5704/5682/1026/5690/5714/5692/5709/5715/51343/5695/5693/207/10197/5708/5717
YAO_TEMPORAL_RESPONSE_TO_PROGESTERONE_CLUSTER_9	69	0.595751	2.02118	0.00226757	0.0149503	0.00956095	2346	tags=45%, list=12%, signal=39%	3880/3958/7103/57111/1999/85415/7113/9603/9636/105375355/8673/3280/7263/26136/29766/6284/5202/5696/5698/10447/4069/5445/7849/8635/3665/8502/400916/55861/873/4331/133418
REACTOME_FBXL7_DOWN_REGULATES_AURKA_DURING_MITOTIC_ENTRY_AND_IN_EARLY_MITOSIS	55	0.620952	2.02888	0.00224719	0.0149503	0.00956095	5370	tags=75%, list=28%, signal=53%	6790/5721/5696/5698/5720/7979/5699/5719/5686/10213/7316/5707/5684/5710/5706/5688/5702/5687/5685/5713/5691/5704/5682/5690/5714/5692/5709/5715/5695/5693/10197/5708/5717/9491/5700/5701/9978/5683/6233/9861/23198
SESTO_RESPONSE_TO_UV_C7	67	0.602065	2.03115	0.00227273	0.0149503	0.00956095	3424	tags=51%, list=18%, signal=42%	1382/11065/6382/6947/991/7083/7851/3655/9982/6510/445/4312/222/5757/5355/9768/4493/1033/471/4522/3976/873/23016/994/5106/3418/8519/6715/3956/9918/3688/132/4319/5321
REACTOME_DEGRADATION_OF_DVL	57	0.620829	2.03145	0.00226244	0.0149503	0.00956095	5467	tags=74%, list=29%, signal=53%	1855/5721/5696/5698/5720/7979/5699/5719/5686/10213/7316/5707/5684/5710/5706/5688/5702/5687/5685/5713/5691/5704/5682/5690/5714/5692/5709/5715/5695/5693/10197/5708/5717/9491/5700/5701/9978/5683/6233/9861/23198/59349
WHITFIELD_CELL_CYCLE_G2	162	0.523187	2.03172	0.00235294	0.0149503	0.00956095	3147	tags=43%, list=17%, signal=36%	4582/4233/54443/11065/7020/7153/51155/983/55355/57211/55655/51203/3833/9833/55143/81610/890/3832/150468/7277/221150/9700/3337/9212/10403/995/23397/9547/10721/4085/83541/83461/4001/157313/957/6491/899/4828/84904/9585/9266/284403/8772/91433/10383/51700/10051/3835/50862/3148/283643/286827/57650/1316/83695/55247/84722/222643/6772/10293/80119/203068/79866/23310/5905/2177/84057/55075/9184/7112
REACTOME_CHOLESTEROL_BIOSYNTHESIS	25	0.735816	2.03235	0.00221239	0.0149503	0.00956095	3957	tags=76%, list=21%, signal=60%	1718/6713/6307/10682/2222/1717/3157/4597/2224/50814/1595/7108/10654/3156/4598/39/6309/9453/51478
BROWNE_HCMV_INFECTION_2HR_DN	46	0.642503	2.03251	0.00224215	0.0149503	0.00956095	1588	tags=39%, list=8%, signal=36%	3880/11065/3675/302/5801/1063/7083/3673/3655/5329/2152/332/23508/1062/1058/1573/1848/10435
MURAKAMI_UV_RESPONSE_6HR_UP	32	0.686901	2.03262	0.00221239	0.0149503	0.00956095	2775	tags=59%, list=15%, signal=51%	2125/928/8797/5327/7205/5792/5879/837/839/4831/9266/843/5597/1832/4830/5625/10293/390/11140
REACTOME_CELL_JUNCTION_ORGANIZATION	91	0.573542	2.03406	0.00228833	0.0149503	0.00956095	1923	tags=38%, list=10%, signal=35%	1308/51208/3914/3918/3691/1001/81607/3909/1364/3728/5339/3655/1366/7408/84612/50848/9076/999/977/137075/3861/1015/92359/3852/1500/5584/1495/9069/283/10207/5819/60/5829/56288/5818
REACTOME_METABOLISM_OF_POLYAMINES	59	0.616491	2.03593	0.00225734	0.0149503	0.00956095	5370	tags=73%, list=28%, signal=52%	1728/54498/5721/5696/5698/5720/7979/6303/5699/6611/5719/51582/5686/10213/5707/5684/5710/5706/5688/5702/5687/5685/79814/5713/5691/5704/5682/5690/5714/5692/5709/5715/5695/5693/10197/5708/5717/9491/5700/5701/5683/9861/23198
ZHANG_INTERFERON_RESPONSE	22	0.756796	2.03894	0.0021978	0.0149503	0.00956095	3327	tags=73%, list=18%, signal=60%	8638/3429/9636/4940/64108/4939/4599/4600/10561/10410/3669/3661/8519/6772/3659/3433
BENNETT_SYSTEMIC_LUPUS_ERYTHEMATOSUS	28	0.717282	2.03901	0.00222222	0.0149503	0.00956095	3373	tags=68%, list=18%, signal=56%	8638/4061/375790/9636/4939/6890/3665/3430/4599/3437/4600/10410/3959/8743/5359/10964/6772/54739/9582
PYEON_CANCER_HEAD_AND_NECK_VS_CERVICAL_UP	183	0.517488	2.03921	0.00249377	0.0149503	0.00956095	3994	tags=41%, list=21%, signal=33%	3880/1999/158158/1063/3303/983/4751/84612/2122/1525/8553/144455/161291/79682/29128/57082/7504/55930/5205/83540/51514/91860/100506658/10635/23443/9837/2146/83879/4001/56992/8702/5366/64105/79733/3206/152185/1122/9735/412/3070/10051/54535/54830/11169/5634/2491/580/29028/4710/8573/83990/394/84451/8476/51133/2618/64426/2935/54069/1029/7112/6498/3213/79956/55120/10714/195828/54904/5277/1030/23141/5985…
REACTOME_NEGATIVE_REGULATION_OF_NOTCH4_SIGNALING	54	0.625903	2.04002	0.00224215	0.0149503	0.00956095	5335	tags=78%, list=28%, signal=56%	7534/5721/5696/5698/5720/7979/10460/5699/5719/5686/10213/7316/5707/5684/5710/5706/5688/5702/5687/5685/5713/5691/5704/5682/5690/5714/5692/5709/5715/5695/5693/207/10197/5708/5717/9491/5700/5701/9978/5683/6233/9861
REACTOME_M_PHASE	331	0.483822	2.04023	0.00254453	0.0149503	0.00956095	4435	tags=43%, list=23%, signal=33%	11065/991/5347/1063/983/4751/9133/113130/332/10112/699/891/84790/55143/9232/11130/11004/64151/79682/1062/57082/701/7277/83540/147841/1058/9700/9212/10403/81930/23397/4085/5721/4001/5696/5698/54820/5720/64105/5595/55722/79019/7979/4000/151648/55920/64900/10733/3619/653784/140609/54892/5699/9735/10383/220134/8548/54821/3320/10051/2491/5719/55706/151246/5686/79023/10213/55839/8815/55055/7316/5707/56…
REACTOME_NONSENSE_MEDIATED_DECAY_NMD_INDEPENDENT_OF_THE_EXON_JUNCTION_COMPLEX_EJC	95	0.56945	2.04151	0.00224215	0.0149503	0.00956095	6403	tags=73%, list=34%, signal=48%	6192/26986/6132/116832/6187/6223/200916/51065/6227/6159/1981/6158/6173/6229/2935/6157/6141/6181/6188/6176/25873/6137/6175/6142/6217/6136/6170/6166/2197/6209/11224/6165/9045/6156/6160/3921/6152/6167/6134/6235/6230/6123/6222/51121/5976/6168/22916/6193/6210/6155/6218/6231/6161/6207/6201/6224/6233/4736/6205/6129/6208/6146/6143/6171/6234/6147/23521/6135/2107
DANG_MYC_TARGETS_UP	127	0.548062	2.04344	0.00241546	0.0149503	0.00956095	3341	tags=45%, list=18%, signal=37%	3159/11065/7083/1476/3939/1164/8061/891/7295/3613/2597/5757/4257/3336/1869/1104/5831/2023/995/3329/11335/5478/4831/4522/6628/7298/8531/5111/5634/8165/7150/6223/84661/4830/22948/6634/5245/4691/993/1622/7037/1965/586/26354/4893/6157/5550/5425/7965/8886/4436/4869/6137/1662/5036/6217/8663
GENTILE_UV_LOW_DOSE_UP	24	0.745181	2.04767	0.00215054	0.0149503	0.00956095	1792	tags=50%, list=9%, signal=45%	9052/1947/3303/3304/9518/9636/54498/10140/6659/5366/6890/898
REACTOME_CDK_MEDIATED_PHOSPHORYLATION_AND_REMOVAL_OF_CDC6	72	0.599781	2.04771	0.0022779	0.0149503	0.00956095	5370	tags=65%, list=28%, signal=47%	11065/890/990/5721/5696/5698/5720/7979/5699/898/1017/5719/5686/10213/7316/5707/5684/5710/5706/5688/5702/5687/5685/5713/5691/5704/5682/5690/5714/5692/5709/5715/51343/51529/5695/5693/10197/5708/7324/5717/9491/5700/5701/5683/6233/9861/23198
BOYAULT_LIVER_CANCER_SUBCLASS_G23_UP	51	0.632542	2.04773	0.00220751	0.0149503	0.00956095	2782	tags=49%, list=15%, signal=42%	2810/4288/1894/4751/9787/10643/55974/24137/79682/701/7504/1058/5315/4171/27338/7298/7035/11339/10552/2237/6240/7884/81539/7037/5756
MISHRA_CARCINOMA_ASSOCIATED_FIBROBLAST_DN	24	0.745595	2.0488	0.00215054	0.0149503	0.00956095	1126	tags=50%, list=6%, signal=47%	3855/3880/4233/3875/3856/3728/3303/1604/3861/4257/10653/100133941
ZAMORA_NOS2_TARGETS_UP	51	0.633546	2.05098	0.00220751	0.0149503	0.00956095	3171	tags=49%, list=17%, signal=41%	3880/3557/133/4173/3337/5879/4860/4171/353/5464/7298/898/6611/1022/5111/1017/10808/3148/2237/6240/9592/71/9470/51082/7936
YAO_TEMPORAL_RESPONSE_TO_PROGESTERONE_CLUSTER_17	181	0.52192	2.05291	0.00245098	0.0149503	0.00956095	4519	tags=54%, list=24%, signal=42%	55630/2950/1163/2063/8986/824/65108/3157/10072/25804/134147/7171/27338/6888/4000/4831/65993/10401/60/26355/3430/219927/51629/414919/9538/10434/3145/140823/11344/51727/5719/9616/6183/4715/10213/51144/8607/378/27166/10987/22827/51647/10055/4191/27089/58527/81892/203068/5688/54998/7520/3615/4528/200185/4706/10589/573/9470/2079/8266/4729/79039/8683/23471/10169/1460/56945/80273/10972/51728/11333/3184/…
VILLANUEVA_LIVER_CANCER_KRT19_UP	173	0.52666	2.05329	0.002457	0.0149503	0.00956095	1811	tags=31%, list=10%, signal=28%	57402/55765/3099/54443/22974/4288/55165/991/7153/1894/9787/55355/6662/10024/10112/699/9833/55143/24137/9232/11130/11004/64151/150468/1040/1062/9768/7272/6659/55789/10403/81930/9837/23397/2146/55388/83461/4001/387521/56992/54820/8438/6491/55215/79019/2820/9585/10733/9266/29789/8906/80045/9735
CHEMNITZ_RESPONSE_TO_PROSTAGLANDIN_E2_UP	142	0.540953	2.0544	0.00236967	0.0149503	0.00956095	3490	tags=54%, list=18%, signal=44%	128239/11065/22974/4288/7153/1063/7083/6241/9787/55355/259266/9133/1164/332/10112/699/51203/9055/891/6790/9232/990/6566/55723/64151/79682/29128/1062/57082/701/84632/9768/221150/4173/1978/8694/7272/84798/8318/23397/10615/1033/4001/55771/51512/6132/27338/54478/653784/10535/6626/10051/10606/580/29028/10036/151246/5092/83990/401466/6675/220042/10055/8833/376267/10797/22934/84759/7163/4869/1175/6472/5…
LI_DCP2_BOUND_MRNA	85	0.591375	2.05685	0.00234192	0.0149503	0.00956095	5976	tags=69%, list=32%, signal=48%	7263/2023/353/26227/6150/6923/11177/27243/57761/10856/1537/10036/6183/7384/637/5702/55660/54663/327/5441/64746/2314/4580/1175/5510/51042/4728/5982/54512/2109/6182/57798/8566/8721/3921/51154/3163/80155/100/8260/4713/1936/30836/3421/51693/27258/6193/5605/10201/7184/9130/6302/5479/7175/51406/64118/23524/51506/8666
BORLAK_LIVER_CANCER_EGF_UP	53	0.632895	2.05693	0.00221729	0.0149503	0.00956095	2422	tags=57%, list=13%, signal=49%	8581/7033/6282/3875/3856/4288/1999/302/7039/983/1894/6241/1366/3397/891/595/7050/6696/389/7429/780/6319/9056/760/23597/5269/11344/5359/3484/9545
JOHNSTONE_PARVB_TARGETS_3_UP	422	0.477943	2.05977	0.00268097	0.015151	0.00968933	2824	tags=38%, list=15%, signal=33%	3880/64073/113146/6337/3691/9022/6273/1364/4070/771/140576/58489/8612/6819/6275/51703/4241/2317/8714/221/3949/10509/3728/3673/144501/64866/26509/26031/81622/146754/1476/1604/4072/375790/84612/5834/50848/55240/11145/79144/5328/10553/1755/9620/307/11282/7045/928/595/55974/7050/374/3241/79180/54541/8553/57804/3177/8673/9961/4088/823/95/3656/1500/10312/4257/6676/55366/965/4017/23268/9314/334/81855/86…
ROY_WOUND_BLOOD_VESSEL_DN	22	0.765288	2.06182	0.0021978	0.0149503	0.00956095	1126	tags=68%, list=6%, signal=64%	6286/4680/688/11254/653145/2065/79098/6662/3866/8842/2568/3861/5205/481/100133941
REACTOME_REGULATION_OF_RUNX3_EXPRESSION_AND_ACTIVITY	55	0.631146	2.06219	0.00224719	0.0149503	0.00956095	5335	tags=76%, list=28%, signal=55%	6714/5721/57154/5696/5698/5720/7979/5699/5719/5686/10213/7316/5707/5684/5710/5706/5688/5702/5687/5685/1029/5713/5691/5704/5682/5690/5714/5692/5709/5715/5695/5693/10197/5708/5717/9491/865/5700/5701/5683/6233/9861
REACTOME_RRNA_PROCESSING	201	0.517968	2.06346	0.00252525	0.0149503	0.00956095	6344	tags=64%, list=34%, signal=43%	6192/8780/54913/6132/23246/55505/116832/9136/28987/56915/10607/6187/6223/23016/200916/51065/51388/6227/6159/6158/115939/54433/4691/9188/6173/27042/10969/2091/25879/55127/114049/6229/55226/51602/26354/6157/6141/6181/6188/51504/6176/84128/51013/25873/8568/6137/6175/6142/6217/6136/6170/10813/6166/2197/84916/6209/10885/54512/81875/55651/11224/1736/6165/9045/23160/6156/6160/1454/90459/9790/92856/3921/…
HU_GENOTOXIC_DAMAGE_4HR	33	0.68959	2.06419	0.00217865	0.0149503	0.00956095	3356	tags=55%, list=18%, signal=45%	54443/991/1894/4751/1164/699/9055/6790/9232/81620/995/3835/6941/149951/211/10797/3150/23381
REACTOME_MITOTIC_SPINDLE_CHECKPOINT	110	0.569135	2.06731	0.00235294	0.0149503	0.00956095	3864	tags=43%, list=20%, signal=34%	11065/991/5347/1063/332/699/55143/11130/11004/79682/1062/57082/701/83540/147841/1058/9212/10403/81930/4085/54820/64105/79019/151648/55920/3619/9735/220134/54821/2491/151246/79023/55839/55055/8379/8655/9793/5905/1781/9184/9183/57122/10726/64946/79980/54908/5525
LIEN_BREAST_CARCINOMA_METAPLASTIC_VS_DUCTAL_DN	110	0.569327	2.06801	0.00235294	0.0149503	0.00956095	1822	tags=39%, list=10%, signal=36%	3880/4680/10551/771/5349/7033/114569/3875/25803/54979/124220/79977/638/55040/155465/2064/83481/1366/4072/1718/5029/92840/11145/10053/999/1474/79170/92747/92359/563/10653/55930/27198/79258/58495/4151/128218/100131187/126695/122970/22874/2000/148327
MUELLER_METHYLATED_IN_GLIOBLASTOMA	43	0.66205	2.06905	0.00222717	0.0149503	0.00956095	1164	tags=40%, list=6%, signal=37%	6286/3880/2810/3872/1364/978/6275/3934/51599/50848/8870/6692/374/3851/1082/26136/3887
REACTOME_EUKARYOTIC_TRANSLATION_INITIATION	119	0.558422	2.07069	0.00235294	0.0149503	0.00956095	6344	tags=73%, list=34%, signal=49%	6192/1978/26986/6132/116832/8894/6187/10480/6223/200916/51065/6227/8667/8662/6159/1981/6158/6173/8668/1965/6229/8892/1968/6157/6141/6181/6188/6176/25873/6137/6175/6142/6217/8663/6136/6170/6166/2197/6209/9669/11224/6165/9045/6156/6160/8669/3646/3921/7458/6152/6167/6134/6235/6230/6123/6222/51121/6168/6193/6210/6155/8664/6218/6231/6161/6207/6201/6224/6233/8893/4736/8661/1974/6205/27335/6129/6208/866…
REACTOME_DEFECTIVE_CFTR_CAUSES_CYSTIC_FIBROSIS	61	0.626262	2.0735	0.0022779	0.0149503	0.00956095	5370	tags=74%, list=28%, signal=53%	5721/5696/5698/5720/7979/5699/5719/5686/10213/10613/7316/5707/5684/5710/5706/5688/5702/5687/5685/6048/5713/5691/5704/5682/11160/5690/1080/5714/5692/5709/5715/5695/5693/10197/5708/79139/5717/9491/5700/5701/5683/6400/6233/9861/23198
PEDERSEN_METASTASIS_BY_ERBB2_ISOFORM_7	378	0.487744	2.0754	0.0025974	0.0149503	0.00956095	2097	tags=34%, list=11%, signal=31%	54869/3694/4486/9022/6273/10103/4233/27111/771/140576/5349/27134/7033/10045/3099/7850/222171/9536/3675/10644/302/129642/3949/30001/7739/118932/79669/7039/11343/26509/1829/10276/1604/5329/8754/259266/1212/64699/7430/56938/9076/89958/130340/4907/2041/56937/54733/3241/858/83442/8797/144455/6461/3832/2017/64151/54509/1824/8412/79682/4312/84002/79962/222/55366/10538/221150/4173/7263/57630/4017/81855/1…
NIKOLSKY_BREAST_CANCER_8Q23_Q24_AMPLICON	154	0.53674	2.07606	0.00232558	0.0149503	0.00956095	2940	tags=42%, list=16%, signal=36%	8000/84985/8581/55630/654463/114569/286077/4061/5339/93100/83481/7264/6713/26873/4796/57210/79581/51337/23513/225689/137797/157638/116447/26233/9401/84988/81858/312/6132/2875/3297/23246/203054/401474/90990/2843/54108/727957/8928/414919/340371/113655/65263/57152/6482/79792/114822/28998/1537/83940/29028/10221/4715/8667/4982/2131/6641/22827/29894/203062/286053/51236/23144/157769/51160
SENGUPTA_NASOPHARYNGEAL_CARCINOMA_DN	347	0.490109	2.07624	0.00254453	0.0149503	0.00956095	2510	tags=33%, list=13%, signal=29%	6286/3855/56649/64073/4582/113146/9022/4585/10103/50853/94025/55765/10551/27134/7033/93010/222171/79838/1728/10158/55808/57530/10874/221/10753/1999/54979/266977/6590/440335/3934/116844/726/6317/171177/23120/81786/80736/79098/9121/11343/146754/1476/1604/83481/200958/1366/1718/2524/131177/120224/7430/10406/27242/5266/8842/25825/147798/10519/137075/3861/7348/23508/3613/92747/8710/445/81031/222/6920/…
WHITFIELD_CELL_CYCLE_G2_M	199	0.52077	2.07789	0.00247525	0.0149503	0.00956095	3013	tags=43%, list=16%, signal=36%	7033/54443/22974/4288/55165/991/5347/1063/2305/51155/1894/4751/9787/9133/89958/1164/1163/332/699/51203/891/595/7050/6790/890/11004/9928/23204/3161/976/57168/1500/1846/1062/701/55872/4173/1495/7272/83540/55635/1058/25886/11135/55789/81839/3337/10615/25987/83461/55771/9319/11113/10207/54820/1265/51512/650/4000/54478/57153/79801/9585/90417/10362/10383/84262/2683/29899/50862/7251/151246/994/255104/78…
ELVIDGE_HYPOXIA_BY_DMOG_UP	133	0.549829	2.07799	0.00234742	0.0149503	0.00956095	1730	tags=35%, list=9%, signal=32%	9052/768/113146/6513/6273/4233/6277/3099/6275/28231/1999/53836/51316/30001/133/112399/57214/5329/6662/444/5768/205/7045/5214/9518/54541/8553/79644/1824/5033/3486/23764/6676/4017/81855/136/5230/51129/51141/283/29923/1956/26355/7422/6303/230
NOJIMA_SFRP2_TARGETS_DN	25	0.753789	2.08199	0.00221239	0.0149503	0.00956095	2665	tags=68%, list=14%, signal=58%	4233/4070/4316/595/598/1082/684/29108/1663/1956/6374/4599/10098/10561/960/8519/6772
NAKAMURA_TUMOR_ZONE_PERIPHERAL_VS_CENTRAL_UP	274	0.500626	2.08301	0.0023753	0.0149503	0.00956095	3373	tags=43%, list=18%, signal=36%	3855/26579/84951/3694/3918/3909/55612/8091/55107/306/55165/64423/7083/983/132299/56262/10276/7286/6241/347902/2152/9133/7430/2877/2150/56937/54733/332/79413/7045/84790/858/24137/64151/3219/3161/79682/374918/29127/4257/7277/55872/3336/2863/81624/6659/112616/4860/3693/11057/5721/9319/26227/1841/23246/79019/3845/283209/79801/90417/55969/51659/1303/7414/79077/51022/23597/2335/3654/10383/26292/3320/15…
TANG_SENESCENCE_TP53_TARGETS_DN	54	0.639964	2.08585	0.00224215	0.0149503	0.00956095	1598	tags=56%, list=8%, signal=51%	11065/22974/991/7153/7083/983/4751/9133/332/10112/699/51203/9055/890/24137/9232/5493/3832/64151/29127/1062/55872/7272/1058/9212/2146/10615/4001/9585/10733
BORCZUK_MALIGNANT_MESOTHELIOMA_UP	300	0.497757	2.08647	0.00240385	0.0149503	0.00956095	4426	tags=47%, list=23%, signal=36%	6273/6282/1382/3159/11065/22974/302/7153/7083/6713/1164/5768/1163/27346/6307/891/7534/6624/11130/3832/5033/2288/701/9768/7416/3068/23186/4017/5230/5315/5831/5879/9837/4085/5898/26986/6732/5531/899/86/27338/11335/51097/10765/90355/55699/1022/10434/10477/5111/10051/1849/5634/191/6636/23480/5984/24140/51582/201562/10963/6742/11222/8323/4830/22948/8667/4521/10987/23028/10573/22827/8476/7058/6415/3251…
REACTOME_RESOLUTION_OF_SISTER_CHROMATID_COHESION	125	0.55878	2.08679	0.00235294	0.0149503	0.00956095	3864	tags=44%, list=20%, signal=35%	991/5347/1063/983/9133/113130/332/699/891/84790/55143/11130/11004/79682/1062/57082/701/7277/83540/147841/1058/9212/10403/81930/4085/54820/64105/79019/151648/55920/3619/9735/10383/220134/54821/2491/151246/79023/55839/55055/8379/8655/9793/5905/1781/9184/9183/79861/57122/10726/64946/79980/10381/54908/5525
INAMURA_LUNG_CANCER_SCC_UP	13	0.862878	2.08892	0.00205339	0.0149503	0.00956095	1923	tags=77%, list=10%, signal=69%	1830/2810/6513/22974/7153/113130/3861/3852/1825/5818
PECE_MAMMARY_STEM_CELL_UP	133	0.553762	2.09286	0.00234742	0.0149503	0.00956095	4694	tags=57%, list=25%, signal=43%	3868/3914/3872/6273/3856/64065/64787/1476/1212/50848/9168/4495/5317/3861/7295/2597/5757/7277/4493/6659/780/5898/3854/6132/6888/5478/4496/28956/10383/9531/1849/1345/23480/6187/6223/12/521/401466/27013/6158/8655/3566/4725/71/280636/6157/6181/514/6188/6176/6137/51075/6142/6217/79095/6170/6166/2197/26521/1327/4126/6165/8721/3921/6152/100131801/4494/6235/30844/1936/6230/6222/59286/4666/83606/6597
WILCOX_RESPONSE_TO_PROGESTERONE_UP	150	0.547432	2.09517	0.00240964	0.0149503	0.00956095	2553	tags=39%, list=14%, signal=34%	688/3949/55165/991/7153/1063/7083/983/6241/9787/55355/57211/259266/9133/727897/27346/10112/6307/54809/51203/9055/79413/891/374/10682/24137/990/2222/5493/64151/3161/1717/79682/9768/55872/3157/10403/79071/27293/5046/3417/6319/80777/55215/6374/51170/79801/7298/7341/2224/11169/5744/50814/3148/55839/1316/1595/9053/3638
NAKAMURA_CANCER_MICROENVIRONMENT_DN	41	0.682141	2.09712	0.00229358	0.0149503	0.00956095	3988	tags=68%, list=21%, signal=54%	23657/991/9133/699/81610/6790/11004/990/9249/57619/10615/9319/157313/8767/25804/55215/90417/55706/5984/8540/586/29968/5036/10713/4704/5985/1491/23406
LU_EZH2_TARGETS_UP	274	0.50432	2.09837	0.0023753	0.0149503	0.00956095	4243	tags=47%, list=22%, signal=37%	113146/5307/9022/6273/8638/6277/3429/6275/11033/6385/4071/638/84152/93659/7286/1366/50848/8870/26472/9636/54541/5920/85014/54509/94115/7205/6623/684/26136/6284/60370/5696/5698/51657/81858/26227/114783/7784/7171/116238/112464/4000/1174/7004/3665/4831/840/6923/118881/3430/3437/399664/5699/2872/3065/57584/57801/79629/414919/57761/149466/113655/2683/666/4350/84264/55111/54985/59307/50486/84331/10534/…
KOBAYASHI_EGFR_SIGNALING_6HR_DN	18	0.799625	2.10006	0.00207469	0.0149503	0.00956095	1620	tags=67%, list=9%, signal=61%	1969/7262/8091/7039/2152/8870/8061/595/1846/23764/1848/7422
REACTOME_VIF_MEDIATED_DEGRADATION_OF_APOBEC3G	54	0.644606	2.10098	0.00224215	0.0149503	0.00956095	5370	tags=78%, list=28%, signal=56%	5721/5696/5698/5720/7979/6923/5699/5719/5686/10213/7316/5707/5684/5710/5706/5688/6921/5702/5687/5685/5713/5691/5704/5682/5690/5714/5692/5709/5715/5695/5693/10197/5708/5717/9491/5700/5701/9978/5683/6233/9861/23198
KUMAMOTO_RESPONSE_TO_NUTLIN_3A_DN	10	0.937354	2.10273	0.0021322	0.0149503	0.00956095	1192	tags=100%, list=6%, signal=94%	991/1063/1164/3833/891/890/11004/57082/10615/1033
LOPEZ_MESOTELIOMA_SURVIVAL_TIME_UP	14	0.849981	2.10338	0.00208768	0.0149503	0.00956095	1528	tags=79%, list=8%, signal=72%	2317/129642/51155/332/9833/6790/24137/995/9319/55257/54478
RICKMAN_HEAD_AND_NECK_CANCER_E	83	0.605163	2.10661	0.00230415	0.0149503	0.00956095	1013	tags=33%, list=5%, signal=31%	1048/10232/8796/4585/3557/54575/55808/284340/266977/218/144568/79983/23657/7113/94122/200958/10643/50506/120224/1562/4883/7348/1356/8876/13/3851/51702
WACKER_HYPOXIA_TARGETS_OF_VHL	13	0.870361	2.10704	0.00205339	0.0149503	0.00956095	1620	tags=77%, list=9%, signal=70%	768/3099/133/7039/595/5214/5033/3486/1356/7422
PID_FOXM1_PATHWAY	39	0.686754	2.10707	0.00227273	0.0149503	0.00956095	2312	tags=46%, list=12%, signal=41%	7039/5347/1063/2305/983/4751/9133/1163/332/891/595/890/1058/9212/898/6667/1017/994
MITSIADES_RESPONSE_TO_APLIDIN_DN	245	0.516005	2.11016	0.00247525	0.0149503	0.00956095	3015	tags=39%, list=16%, signal=33%	9052/55612/22974/4288/5339/7153/1063/2305/1894/4751/6241/9787/55355/1718/259266/4605/27346/332/699/51203/891/928/9833/55143/146909/6790/890/24137/9232/11130/9928/3613/64151/29127/9748/701/9768/4173/81620/3068/1495/1058/90861/9837/23397/4171/9319/6319/55215/6526/839/11335/79801/10460/7298/54892/79728/898/5291/55608/3070/54821/5597/10434/6626/51727/5420/191/55706/50814/5984/10036/8826/1832/3182/624…
DELPUECH_FOXO3_TARGETS_UP	64	0.63138	2.11138	0.00225734	0.0149503	0.00956095	2210	tags=44%, list=12%, signal=39%	6286/5655/688/7262/1364/10158/2065/7039/2886/1604/5329/27242/928/4084/3248/9961/65108/7263/3854/1848/10435/6303/8549/901/10512/3489/7328/6674
REACTOME_O_LINKED_GLYCOSYLATION_OF_MUCINS	62	0.633953	2.11152	0.00225225	0.0149503	0.00956095	2034	tags=44%, list=11%, signal=39%	4586/4582/140453/4585/94025/10331/11227/93010/9245/192134/2591/11226/200958/727897/79695/51809/4584/84002/394263/79623/10164/9334/56667/55568/56913/6482/10071
CHIN_BREAST_CANCER_COPY_NUMBER_UP	27	0.742951	2.11288	0.00214592	0.0149503	0.00956095	3112	tags=56%, list=16%, signal=46%	3918/7153/2064/4605/5743/595/6790/2017/5058/7764/1591/2131/7042/5747/1434
GU_PDEF_TARGETS_DN	40	0.685435	2.11367	0.0022779	0.0149503	0.00956095	2487	tags=45%, list=13%, signal=39%	3855/3853/3880/3694/3691/1001/3875/3856/999/7855/57154/3854/79837/5291/286887/3169/3696/2296
PELLICCIOTTA_HDAC_IN_ANTIGEN_PRESENTATION_DN	49	0.655171	2.11609	0.00217391	0.0149503	0.00956095	5424	tags=84%, list=29%, signal=60%	3157/5721/5696/5698/6890/5720/5699/2923/10213/10945/6891/5684/27230/64167/5706/5688/5702/5687/5685/10130/5713/5682/3106/6892/3107/5690/5714/5693/10197/79139/5717/9491/468/5700/5701/3105/821/5683/222068/23198/10954
LE_EGR2_TARGETS_UP	101	0.588714	2.11678	0.00234192	0.0149503	0.00956095	2435	tags=49%, list=13%, signal=42%	128239/4288/991/5347/7153/983/1894/6241/9133/7430/27242/1164/26472/1163/332/10112/699/51203/9055/891/595/55143/6790/890/11004/3832/29128/29089/9768/4173/65108/28969/23397/2146/5888/9547/4085/4001/10733/3619/3835/3148/6941/92521/286826/286827/960/57650/6240
KEGG_PROTEASOME	44	0.675801	2.11721	0.00225734	0.0149503	0.00956095	5370	tags=84%, list=28%, signal=60%	5721/5696/5698/5720/7979/5699/5719/5686/10213/5707/5684/5710/5706/5688/5702/51371/5687/5685/5713/5691/5704/5682/5690/5714/5692/5709/5695/5693/10197/5708/5717/9491/5700/5701/5683/9861/23198
TARTE_PLASMA_CELL_VS_PLASMABLAST_DN	299	0.50512	2.11775	0.00238663	0.0149503	0.00956095	4130	tags=56%, list=22%, signal=44%	11065/6281/4288/3949/991/7153/2591/2305/983/4751/6241/9787/1718/1164/1192/9168/1163/27346/10024/3833/891/5214/10682/890/11004/9928/7295/990/6566/2222/3832/3248/9961/3161/1062/578/7277/9768/3336/7416/7272/965/1058/5230/9700/9837/4860/2146/7086/283/1033/4085/5721/8942/4001/5696/9319/471/6150/5531/6491/899/1841/27338/23246/839/11335/4522/10733/7298/898/6637/602/7341/26292/5597/2224/5111/6573/10606/3…
REACTOME_RRNA_PROCESSING_IN_THE_NUCLEUS_AND_CYTOSOL	192	0.533385	2.11792	0.0025	0.0149503	0.00956095	6344	tags=67%, list=34%, signal=45%	6192/8780/54913/6132/23246/55505/116832/9136/28987/56915/10607/6187/6223/23016/200916/51065/51388/6227/6159/6158/115939/54433/4691/9188/6173/27042/10969/2091/25879/55127/114049/6229/55226/51602/26354/6157/6141/6181/6188/51504/6176/84128/51013/25873/8568/6137/6175/6142/6217/6136/6170/10813/6166/2197/84916/6209/10885/54512/81875/55651/11224/1736/6165/9045/23160/6156/6160/1454/90459/9790/92856/3921/…
GARGALOVIC_RESPONSE_TO_OXIDIZED_PHOSPHOLIPIDS_TURQUOISE_DN	55	0.649272	2.12142	0.00224719	0.0149503	0.00956095	3245	tags=58%, list=17%, signal=48%	4288/991/5347/3833/6790/890/2063/9249/701/147841/23170/9700/10403/10263/79071/56992/374393/5371/899/79733/10460/221908/580/151246/55247/23212/55344/79714/7112/54739/63901/60491
REACTOME_REGULATION_OF_APOPTOSIS	53	0.653429	2.12367	0.00221729	0.0149503	0.00956095	5370	tags=79%, list=28%, signal=57%	5721/5696/5698/5720/7979/5699/5719/5686/10213/7316/5707/5684/5710/5706/5688/5702/5687/5685/5713/5691/5704/5682/5690/5714/5692/5709/5715/5062/5695/5693/10197/5708/5717/9491/4976/5700/5701/5683/6233/9861/115209/23198
HOFMANN_MYELODYSPLASTIC_SYNDROM_LOW_RISK_DN	28	0.747356	2.12451	0.00222222	0.0149503	0.00956095	2259	tags=50%, list=12%, signal=44%	9052/10103/3856/302/7851/8870/595/9518/5460/10263/7022/826/5719/10963
REACTOME_REGULATION_OF_MRNA_STABILITY_BY_PROTEINS_THAT_BIND_AU_RICH_ELEMENTS	87	0.605722	2.12751	0.00230947	0.0149503	0.00956095	5370	tags=69%, list=28%, signal=50%	3303/7534/3315/5721/5696/26986/5698/5720/7979/677/5699/56915/5719/5686/5580/10213/23016/7316/5707/1981/5684/5710/5706/5688/5702/5687/5685/5713/51013/7529/5691/5704/5682/5073/3184/54512/8125/5690/6418/5714/5692/5709/5715/5695/5693/207/10197/5708/5717/7514/9491/5700/5701/22894/8741/5683/8570/6233/9861/23198
REN_BOUND_BY_E2F	55	0.651281	2.12798	0.00224719	0.0149503	0.00956095	4340	tags=65%, list=23%, signal=51%	7153/7083/983/890/9232/990/1062/7272/1058/10403/5888/4085/8438/1111/5111/10051/1017/580/5984/7374/2237/6240/993/6119/5558/9184/4998/4436/5424/5982/4676/1870/3149/4175/23649/10926
SMID_BREAST_CANCER_LUMINAL_A_DN	18	0.810325	2.12816	0.00207469	0.0149503	0.00956095	2672	tags=83%, list=14%, signal=72%	3868/22974/991/7153/4605/51442/55143/10403/8318/23397/83461/898/55839/9654/7804
DELPUECH_FOXO3_TARGETS_DN	34	0.703958	2.12946	0.00220751	0.0149503	0.00956095	2943	tags=65%, list=16%, signal=55%	11065/4288/1063/2305/4751/1948/51203/9055/374/6790/11130/5831/4151/1841/7422/10051/3835/5106/26471/3615/10797/1054
WATANABE_COLON_CANCER_MSI_VS_MSS_UP	28	0.749479	2.13054	0.00222222	0.0149503	0.00956095	1637	tags=46%, list=9%, signal=42%	4586/83998/10551/128239/7020/5874/81786/745/1846/4493/2537/7546/1396
REACTOME_SWITCHING_OF_ORIGINS_TO_A_POST_REPLICATIVE_STATE	90	0.602769	2.13329	0.00228311	0.0149503	0.00956095	5472	tags=68%, list=29%, signal=48%	11065/890/990/4173/81620/4171/5721/23594/5696/5698/5720/7979/5699/898/1017/5719/5686/10213/7316/5707/5684/4176/5710/4999/5706/5688/5702/5687/5685/4998/5713/5691/5704/5682/5690/5714/5692/5709/5715/4175/51343/84515/51529/5695/5693/10197/5708/7324/5717/5000/9491/5700/5701/4174/4172/9978/5683/6233/9861/23198/5001
ZHANG_RESPONSE_TO_IKK_INHIBITOR_AND_TNF_UP	219	0.529698	2.13495	0.00251889	0.0149503	0.00956095	3043	tags=43%, list=16%, signal=36%	51208/3914/8638/6707/3557/7850/80117/6385/4071/89870/118932/79669/55359/64423/3664/84419/113278/5329/1942/6698/9076/9235/5266/5328/8482/25841/2635/54541/4084/163732/4088/54509/1992/3656/84002/374918/23764/8795/65108/222584/80223/27076/7127/8942/85441/3854/6890/8767/6364/130367/650/5663/1051/9334/134285/80149/4322/11177/3437/10938/6242/602/330/3976/57162/3669/64135/901/8743/50486/143872/4791/5971/…
AMIT_EGF_RESPONSE_120_MCF10A	41	0.694699	2.13573	0.00229358	0.0149503	0.00956095	2190	tags=46%, list=12%, signal=41%	1969/10045/5329/2069/8061/9518/8986/23764/8915/6364/25804/1848/1174/55257/23612/3976/8507/6737/5092
SCHUHMACHER_MYC_TARGETS_UP	77	0.617836	2.13776	0.00225734	0.0149503	0.00956095	4189	tags=60%, list=22%, signal=47%	3939/27346/205/6566/4257/2288/6574/3336/1104/5831/6652/5437/6732/23246/4522/10606/10607/5634/191/8165/54205/23016/11222/10131/4830/1595/23212/7804/9188/10969/7037/7347/3615/22934/5425/7965/5902/10135/1662/23516/7443/9221/2653/7371/483/1503
SCIAN_CELL_CYCLE_TARGETS_OF_TP53_AND_TP73_DN	21	0.799483	2.14187	0.00213675	0.0149503	0.00956095	2719	tags=86%, list=14%, signal=73%	11065/22974/991/1164/891/6790/890/995/1033/51512/899/1841/3835/1017/50486/994/4176/5901
VANTVEER_BREAST_CANCER_ESR1_DN	262	0.521812	2.14527	0.00251889	0.0149503	0.00956095	3011	tags=41%, list=16%, signal=35%	3868/23650/3855/768/3783/1969/1001/3898/54443/10158/6281/4071/4316/133/6768/55165/991/7851/1476/80115/55355/10205/8645/9133/1672/4605/55240/56938/27242/51442/8842/9168/699/9833/1515/5214/2568/5317/55143/6624/11004/3613/2597/1824/445/84002/221150/84706/3068/7272/7368/81624/1535/1058/55503/2175/114908/2023/26136/80727/83879/57707/83461/387521/55771/9111/90381/26227/3854/9721/8438/6491/8543/4828/797…
REACTOME_SCF_SKP2_MEDIATED_DEGRADATION_OF_P27_P21	60	0.646174	2.14626	0.00226244	0.0149503	0.00956095	5335	tags=75%, list=28%, signal=54%	5753/1163/595/890/5721/5696/5698/5720/7979/5699/898/1017/5719/5686/10213/7316/5707/5684/5710/5706/5688/5702/5687/5685/5713/5691/5704/5682/1026/5690/5714/5692/5709/5715/5695/5693/10197/5708/5717/9491/5700/5701/5683/6233/9861
WANG_BARRETTS_ESOPHAGUS_AND_ESOPHAGUS_CANCER_UP	26	0.770407	2.14869	0.00221729	0.0149503	0.00956095	2050	tags=62%, list=11%, signal=55%	3918/10551/7103/3856/90993/2705/9518/3171/563/1535/5696/4069/57104/1396/10094/871
MOLENAAR_TARGETS_OF_CCND1_AND_CDK4_DN	57	0.65786	2.15263	0.00226244	0.0149503	0.00956095	1706	tags=46%, list=9%, signal=42%	22974/55165/1063/55355/10112/9833/55143/81610/6790/24137/144455/11004/990/3832/57082/9768/51514/8318/23397/83879/9319/157313/64105/9585/9991/23052
REACTOME_ORC1_REMOVAL_FROM_CHROMATIN	71	0.634495	2.15722	0.00230415	0.0149503	0.00956095	5472	tags=79%, list=29%, signal=56%	890/990/4173/81620/4171/5721/23594/5696/5698/5720/7979/5699/1017/5719/5686/10213/7316/5707/5684/4176/5710/4999/5706/5688/5702/5687/5685/4998/5713/5691/5704/5682/5690/5714/5692/5709/5715/4175/84515/5695/5693/10197/5708/5717/5000/9491/5700/5701/4174/4172/9978/5683/6233/9861/23198/5001
REACTOME_REGULATION_OF_MITOTIC_CELL_CYCLE	86	0.618292	2.15774	0.00234742	0.0149503	0.00956095	4435	tags=57%, list=23%, signal=44%	11065/991/5347/983/4751/891/6790/890/9232/701/9212/4085/5721/5696/5698/5720/7979/5699/1017/5719/5686/10213/7316/5707/5684/5710/5706/5688/5702/5687/5685/9184/5713/5691/5704/5682/5690/5714/5692/5709/5715/51343/51529/5695/5693/10197/5708/7324/5717
REACTOME_APC_C:CDH1_MEDIATED_DEGRADATION_OF_CDC20_AND_OTHER_APC_C:CDH1_TARGETED_PROTEINS_IN_LATE_MITOSIS_EARLY_G1	72	0.632716	2.16015	0.0022779	0.0149503	0.00956095	5370	tags=67%, list=28%, signal=48%	11065/991/5347/6790/9232/9212/5721/5696/5698/5720/7979/5699/5719/5686/10213/7316/5707/5684/5710/5706/5688/5702/5687/5685/5713/5691/5704/5682/5690/5714/5692/5709/5715/51343/51529/5695/5693/10197/5708/7324/5717/9491/5700/5701/5683/6233/9861/23198
PID_A6B1_A6B4_INTEGRIN_PATHWAY	46	0.683319	2.16163	0.00224215	0.0149503	0.00956095	1544	tags=37%, list=8%, signal=34%	1308/3914/2810/3918/3691/4486/4233/3909/2065/3655/2064/928/999/7534/5879/1956/840
SONG_TARGETS_OF_IE86_CMV_PROTEIN	53	0.666209	2.1652	0.00221729	0.0149503	0.00956095	3760	tags=60%, list=20%, signal=48%	22974/7083/2305/983/4605/745/9232/11130/3832/9768/1869/81620/4860/2146/4171/4085/7298/898/5111/580/3148/7374/10465/6240/4176/80308/79022/4436/5982/10714/23234/641
TIEN_INTESTINE_PROBIOTICS_24HR_DN	206	0.54045	2.16776	0.00246305	0.0149503	0.00956095	3905	tags=40%, list=21%, signal=32%	6286/3914/688/10551/80201/5646/54575/1728/79083/54845/221/1999/57016/9245/1604/7408/6535/9518/79170/54541/5920/6510/2050/990/5792/10263/23231/26136/9601/26986/23645/1051/7422/6303/182/9650/9181/57761/10342/10808/7328/9208/6187/6223/2923/10945/2673/7873/378/5106/7316/27230/23196/10959/6229/811/8878/10797/1054/71/10130/6157/6188/5034/64746/6137/92140/6175/23471/219699/6136/6170/11163/64225/2495/330…
PID_PLK1_PATHWAY	46	0.685458	2.1684	0.00224215	0.0149503	0.00956095	3655	tags=61%, list=19%, signal=49%	22974/991/5347/983/1894/10112/699/9055/891/6790/79682/5058/1062/701/147841/10403/995/151648/3619/54821/994/79866/7465/387/5861/10726/7283/63967
REACTOME_MITOCHONDRIAL_TRANSLATION	94	0.609287	2.1693	0.00227273	0.0149503	0.00956095	5340	tags=63%, list=28%, signal=45%	122704/6150/60488/64928/65993/219927/29088/64968/28998/6183/51642/11222/79590/65003/51253/63875/10573/118487/54998/64969/55173/4528/7284/57129/7818/64975/65005/55168/740/56945/65080/90480/51021/51258/54948/6182/9801/64960/124995/29093/92399/51263/128308/64951/10884/85476/5018/92259/54460/64983/51073/54148/51069/51264/55052/28957/28973/64965/65008
[truncated: 139 more rows]

## Sheet: C5
Supplementary Table6. Gene set enrichment analysis between high and low risk groups in 165 samples from TCGA PAAD
Description	setSize	enrichmentScore	NES	pvalue	p.adjust	qvalues	rank	leading_edge	core_enrichment
[truncated: 644 more rows]

## Sheet: C6
Supplementary Table6. Gene set enrichment analysis between high and low risk groups in 165 samples from TCGA PAAD
Description	setSize	enrichmentScore	NES	pvalue	p.adjust	qvalues	rank	leading_edge	core_enrichment
[truncated: 95 more rows]
